# Supplementary material for: A 24 h Age Difference Causes Twice as Much Gene Expression Divergence as 100 Generations of Adaptation to a Novel Environment
Source: MDPI journal article supplement (doi:10.3390/genes10020089), 2019-01-28
Supplement: s1 [file s1]

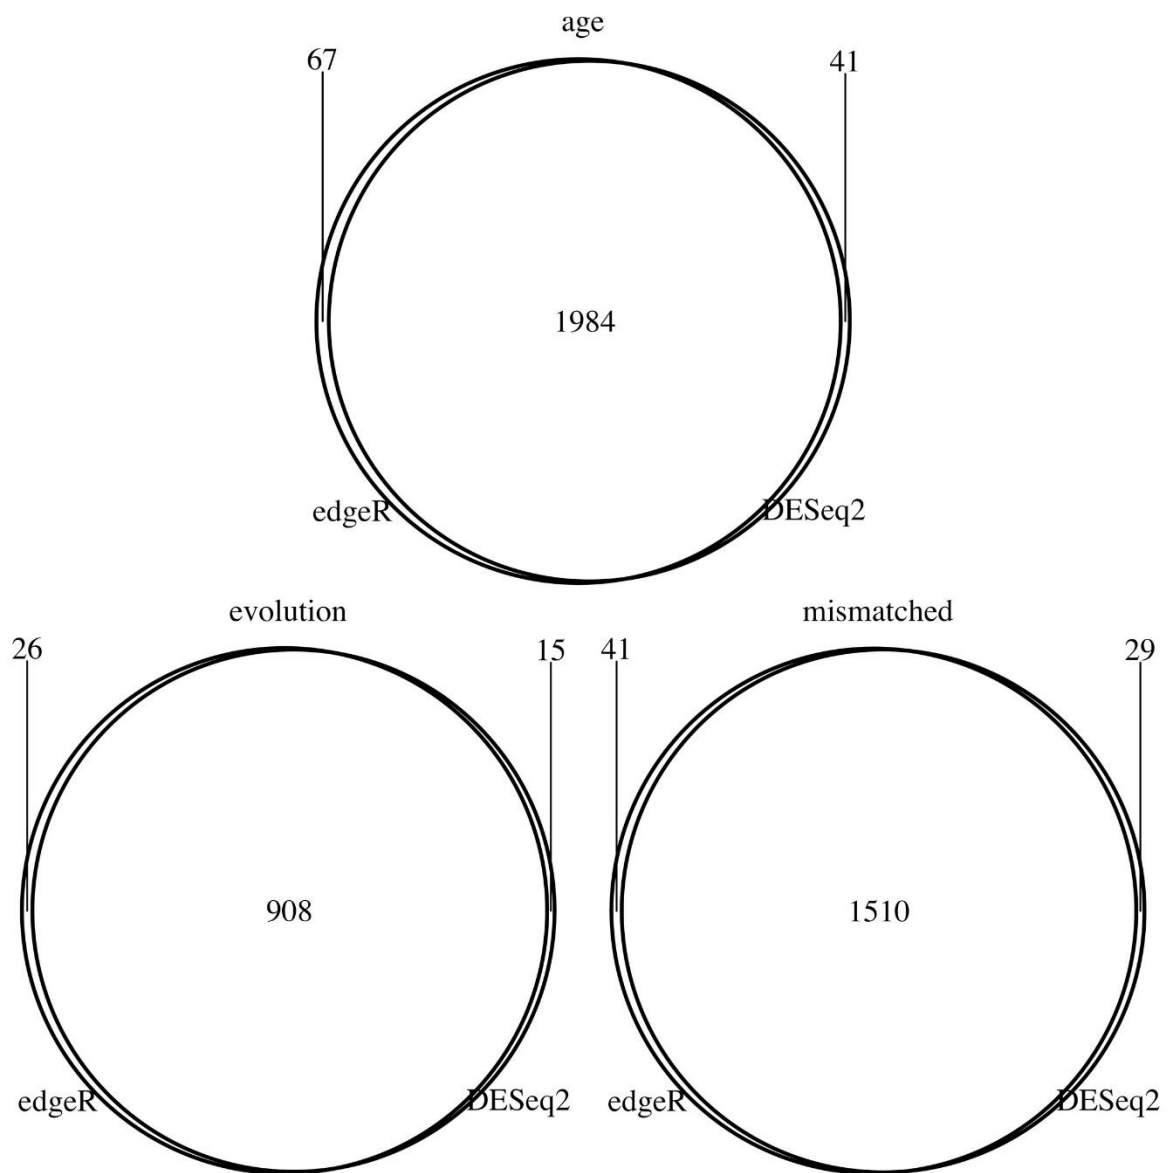

**Figure S1:** Venn diagram of genes identified in different contrasts by DESeq2 and edgeR.

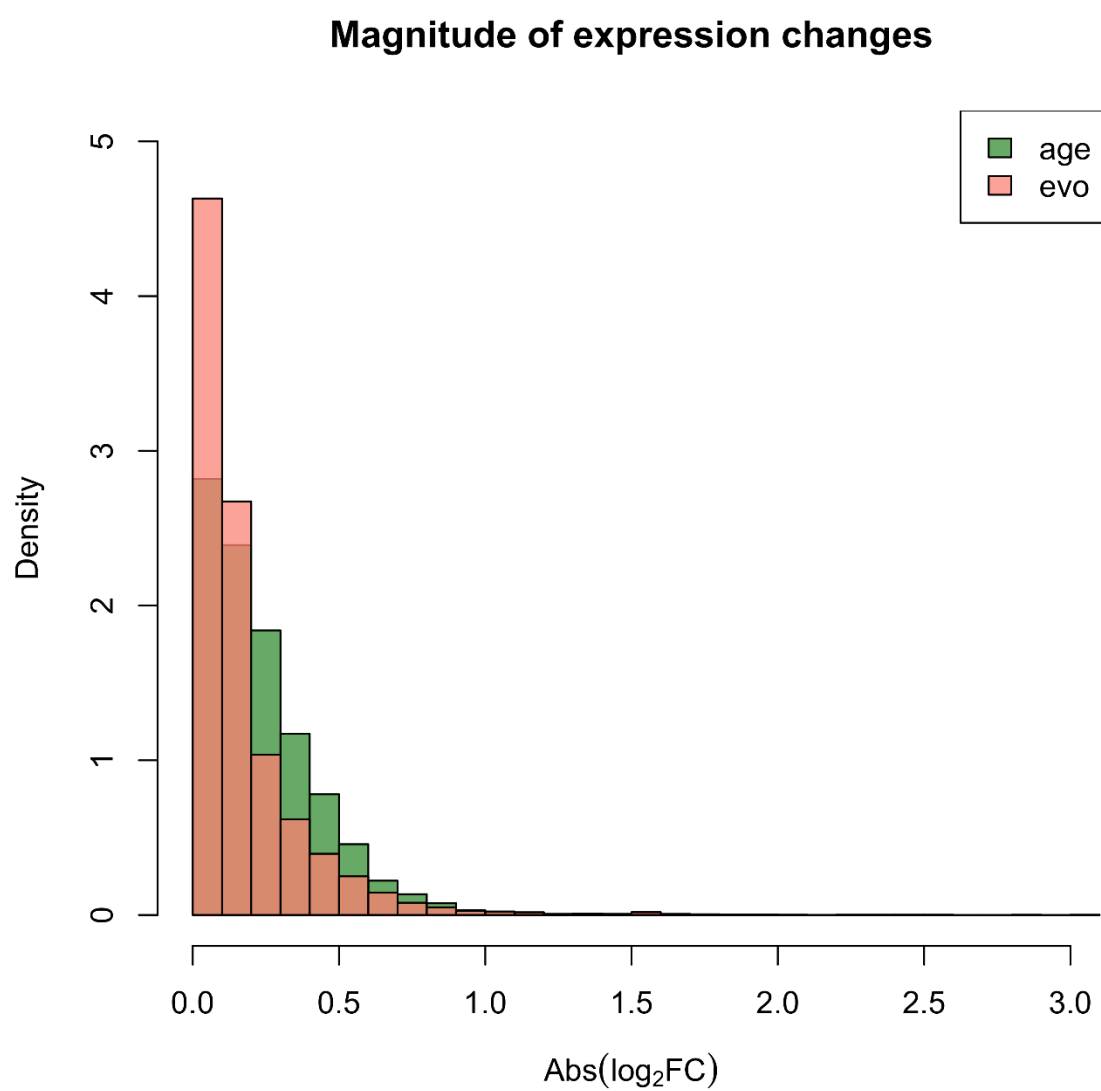

**Figure S2:** Magnitude of expression changes by age difference and evolution.

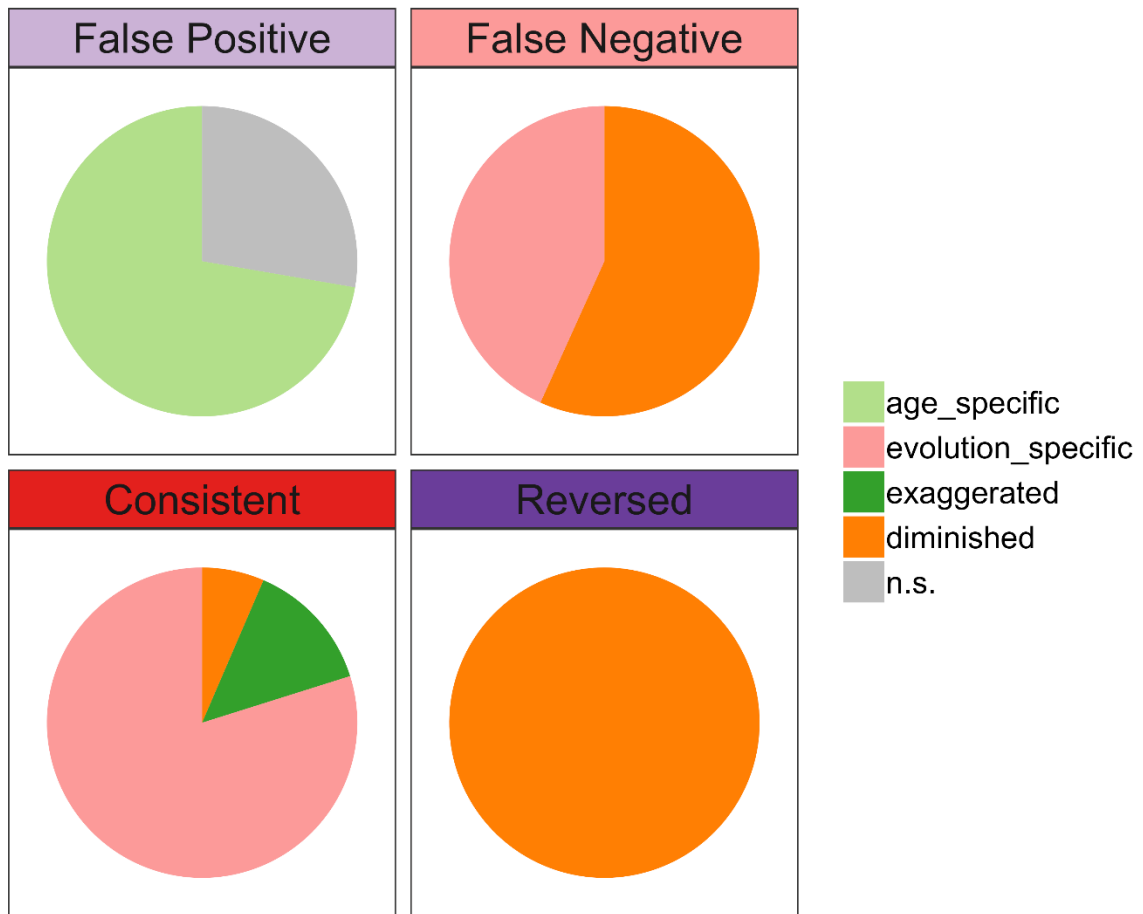

**Figure S3:** Pie chart showing the proportion of age-related effect among the differentially expressed genes in the contrast mismatched.
