# Supplementary material for: A 24 h Age Difference Causes Twice as Much Gene Expression Divergence as 100 Generations of Adaptation to a Novel Environment
Source: Genes (Basel). 2019 Jan 28;10(2):89. doi: 10.3390/genes10020089 (PMC6410183; doi:10.3390/genes10020089)
Supplement: Supplementary file 1 [file genes-10-00089-s001.zip]

Archive with 5 entries (4 files):
- genes-429923-SI/
- genes-429923-SI/genes-429923 supp figures.pdf
- genes-429923-SI/TableS1.mapping_statistics.xlsx
- genes-429923-SI/TableS2.GO_result_of_age_and_evolution_effect.xlsx
- genes-429923-SI/TableS3.GO_result_of_mismatched_contrast.xlsx
