# Supplementary material for: A 24 h Age Difference Causes Twice as Much Gene Expression Divergence as 100 Generations of Adaptation to a Novel Environment
Source: Genes (Basel). 2019 Jan 28;10(2):89. doi: 10.3390/genes10020089 (PMC6410183; doi:10.3390/genes10020089)
Supplement: Supplementary file 1 [file genes-10-00089-s001.zip › genes-429923-SI/TableS1.mapping_statistics.xlsx]

## Sheet: Sheet1
	anc_1_5d	anc_2_5d	anc_3_5d	anc_4_5d	anc_5_5d	evo_1_6d	evo_2_6d	evo_3_6d	evo_4_6d	evo_5_6d	evo_1_5d	evo_2_5d	evo_3_5d	evo_4_5d	evo_5_5d
Assigned	11254507	12887886	13862395	16481652	15522071	11511101	11832788	11488153	13573993	12958743	15004068	12366778	15068317	12960517	14099219
Unassigned_NoFeatures	2452296	2685095	2718676	3504143	2991792	2271573	2266724	1817991	1978637	1947426	2555678	1994319	2318486	1890010	2184653
Unassigned_Ambiguity	58850	67451	75827	86138	79960	63857	64733	60944	72997	71001	84557	64751	80700	67276	74549
total_mapped	13765653	15640432	16656898	20071933	18593823	13846531	14164245	13367088	15625627	14977170	17644303	14425848	17467503	14917803	16358421
total_read	13979940	15830638	16789258	20276388	18746522	14127203	14287237	13543786	15746896	15160702	17783951	14651950	17598703	15276254	16522660
Assigned	0.805047	0.81411	0.82567	0.81285	0.827997	0.814818	0.828207	0.848223	0.862011	0.854759	0.843686	0.844036	0.856217	0.848409	0.853326
Unassigned_NoFeatures	0.175415	0.169614	0.161929	0.172819	0.159592	0.160794	0.158654	0.134231	0.125653	0.128452	0.143707	0.136113	0.131742	0.123722	0.132222
Unassigned_Ambiguity	0.0042096	0.00426079	0.0045164	0.00424819	0.00426532	0.00452014	0.00453083	0.00449978	0.00463564	0.00468323	0.00475468	0.00441928	0.00458557	0.00440396	0.00451192
total_mapped	0.984672	0.987985	0.992116	0.989917	0.991855	0.980133	0.991391	0.986954	0.992299	0.987894	0.992148	0.984568	0.992545	0.976535	0.99006
total_read	1	1	1	1	1	1	1	1	1	1	1	1	1	1	1
