# Supplementary material for: A 24 h Age Difference Causes Twice as Much Gene Expression Divergence as 100 Generations of Adaptation to a Novel Environment
Source: Genes (Basel). 2019 Jan 28;10(2):89. doi: 10.3390/genes10020089 (PMC6410183; doi:10.3390/genes10020089)
Supplement: Supplementary file 1 [file genes-10-00089-s001.zip › genes-429923-SI/TableS2.GO_result_of_age_and_evolution_effect.xlsx]

## Sheet: legend
sheet name	number of genes	contrasts
		age	evolution
GO_age_up	1332	sig. (FC>1.25)	-
GO_age_down	719	sig. (FC<0.8)	-
GO_evo_up	156	-	sig. (FC>1.25)
GO_evo_down	778	-	sig. (FC<0.8)
GO_age_spec_up	926	sig. (FC>1.25)	n.s.
GO_age_spec_down	691	sig. (FC<0.8)	n.s.
GO_evo_spec_up	96	n.s.	sig. (FC>1.25)
GO_evo_spec_down	404	n.s.	sig. (FC<0.8)
GO_exaggerated_up	35	sig. (FC>1.25)	sig. (FC>1.25)
GO_exaggerated_down	3	sig. (FC<0.8)	sig. (FC<0.8)
GO_diminished_up	25	sig. (FC<0.8)	sig. (FC>1.25)
GO_diminished_down	371	sig. (FC>1.25)	sig. (FC<0.8)

## Sheet: GO_age_up
GO.ID	Term	Annotated	Significant	Expected	Rank in Fisher.classic	Fisher.classic	Fisher.weight01
GO:0007156	homophilic cell adhesion via plasma membrane adhesion molecules	29	17	4.16	40	3.9e-08	3.9e-08
GO:0006508	proteolysis	573	93	82.27	695	0.1034	2.6e-07
GO:0007479	leg disc proximal/distal pattern formation	11	9	1.58	63	1.1e-06	1.1e-06
GO:0071805	potassium ion transmembrane transport	40	19	5.74	54	5.4e-07	1.2e-06
GO:0007605	sensory perception of sound	44	19	6.32	77	3.3e-06	3.3e-06
GO:0042391	regulation of membrane potential	78	33	11.2	22	1.5e-09	8.8e-06
GO:0007165	signal transduction	1242	214	178.33	206	0.00107	9.7e-06
GO:0008039	synaptic target recognition	36	15	5.17	122	5.9e-05	1.7e-05
GO:0008406	gonad development	44	20	6.32	59	6.6e-07	4.9e-05
GO:0007432	salivary gland boundary specification	20	11	2.87	100	2.5e-05	5e-05
GO:0007608	sensory perception of smell	42	16	6.03	135	0.00012	8.6e-05
GO:0000122	negative regulation of transcription by RNA polymerase II	134	36	19.24	132	9.8e-05	9.8e-05
GO:0008045	motor neuron axon guidance	56	19	8.04	138	0.00018	0.00018
GO:0007523	larval visceral muscle development	8	6	1.15	140	0.00019	0.00019
GO:0016311	dephosphorylation	135	26	19.38	624	0.06882	0.00021
GO:0007400	neuroblast fate determination	14	8	2.01	149	0.00024	0.00024
GO:0014019	neuroblast development	14	8	2.01	150	0.00024	0.00024
GO:0007305	vitelline membrane formation involved in chorion-containing eggshell formation	11	7	1.58	151	0.00024	0.00024
GO:0007473	wing disc proximal/distal pattern formation	6	5	0.86	164	0.00032	0.00032
GO:0072175	epithelial tube formation	6	5	0.86	165	0.00032	0.00032
GO:0007498	mesoderm development	75	27	10.77	70	2.3e-06	0.00035
GO:0070983	dendrite guidance	22	10	3.16	169	0.00044	0.00044
GO:0007469	antennal development	17	8	2.44	213	0.00128	0.00049
GO:0046845	branched duct epithelial cell fate determination, open tracheal system	9	6	1.29	171	0.00049	0.00049
GO:1900074	negative regulation of neuromuscular synaptic transmission	9	6	1.29	172	0.00049	0.00049
GO:0016348	imaginal disc-derived leg joint morphogenesis	12	7	1.72	173	0.0005	0.0005
GO:0044331	cell-cell adhesion mediated by cadherin	12	7	1.72	174	0.0005	0.0005
GO:0007413	axonal fasciculation	19	9	2.73	181	0.0006	0.0006
GO:0072499	photoreceptor cell axon guidance	27	11	3.88	189	0.00073	0.00073
GO:0016339	calcium-dependent cell-cell adhesion via plasma membrane cell adhesion molecules	16	8	2.3	194	0.00077	0.00077
GO:0030198	extracellular matrix organization	45	19	6.46	78	4.9e-06	0.00092
GO:0042493	response to drug	140	34	20.1	208	0.00113	0.00094
GO:0001752	compound eye photoreceptor fate commitment	45	13	6.46	341	0.00868	0.00098
GO:0007602	phototransduction	51	20	7.32	89	1.1e-05	0.00098
GO:0007503	fat body development	7	5	1.01	202	0.00099	0.00099
GO:0007411	axon guidance	211	64	30.3	19	1.2e-09	0.00125
GO:0016477	cell migration	266	55	38.19	251	0.00269	0.00127
GO:0045944	positive regulation of transcription by RNA polymerase II	230	48	33.02	273	0.00404	0.00172
GO:0055065	metal ion homeostasis	92	20	13.21	501	0.03501	0.00185
GO:0042045	epithelial fluid transport	18	8	2.58	238	0.00201	0.00186
GO:0007313	maternal specification of dorsal/ventral axis, oocyte, soma encoded	5	4	0.72	231	0.00187	0.00187
GO:0035310	notum cell fate specification	5	4	0.72	232	0.00187	0.00187
GO:0042694	muscle cell fate specification	5	4	0.72	233	0.00187	0.00187
GO:0046701	insecticide catabolic process	5	4	0.72	234	0.00187	0.00187
GO:0086010	membrane depolarization during action potential	5	4	0.72	235	0.00187	0.00187
GO:0090288	negative regulation of cellular response to growth factor stimulus	18	5	2.58	704	0.10409	0.00188
GO:0007419	ventral cord development	62	18	8.9	240	0.00207	0.00207
GO:0007482	haltere development	11	6	1.58	241	0.00209	0.00209
GO:0007420	brain development	94	27	13.5	147	0.00022	0.00258
GO:0055114	oxidation-reduction process	433	69	62.17	868	0.18474	0.00271
GO:0007435	salivary gland morphogenesis	81	23	11.63	192	0.00075	0.00275
GO:0007157	heterophilic cell-cell adhesion via plasma membrane cell adhesion molecules	15	7	2.15	252	0.00276	0.00276
GO:0006644	phospholipid metabolic process	122	15	17.52	2012	0.78053	0.00288
GO:0007494	midgut development	27	10	3.88	259	0.00294	0.00294
GO:0050877	nervous system process	365	101	52.41	5	7.9e-12	0.00317
GO:0007548	sex differentiation	80	33	11.49	28	3.4e-09	0.00337
GO:0072002	Malpighian tubule development	52	20	7.47	92	1.5e-05	0.00353
GO:0006629	lipid metabolic process	386	60	55.42	1028	0.26826	0.00367
GO:0008585	female gonad development	12	6	1.72	266	0.00367	0.00367
GO:0010038	response to metal ion	33	9	4.74	506	0.03848	0.00367
GO:0010629	negative regulation of gene expression	472	71	67.77	1150	0.35104	0.00408
GO:0032504	multicellular organism reproduction	898	126	128.94	1647	0.63349	0.00421
GO:0018990	ecdysis, chitin-based cuticle	16	7	2.3	277	0.00431	0.00431
GO:0006032	chitin catabolic process	20	8	2.87	279	0.00445	0.00445
GO:0002052	positive regulation of neuroblast proliferation	9	5	1.29	283	0.00461	0.00461
GO:0035225	determination of genital disc primordium	9	5	1.29	284	0.00461	0.00461
GO:0042693	muscle cell fate commitment	11	8	1.58	98	1.9e-05	0.00492
GO:0006805	xenobiotic metabolic process	12	8	1.72	115	5.1e-05	0.00492
GO:0003407	neural retina development	6	4	0.86	290	0.00498	0.00498
GO:0007425	epithelial cell fate determination, open tracheal system	6	4	0.86	291	0.00498	0.00498
GO:0019226	transmission of nerve impulse	6	4	0.86	292	0.00498	0.00498
GO:0035094	response to nicotine	6	4	0.86	293	0.00498	0.00498
GO:0035224	genital disc anterior/posterior pattern formation	6	4	0.86	294	0.00498	0.00498
GO:0046680	response to DDT	6	4	0.86	295	0.00498	0.00498
GO:0007155	cell adhesion	158	50	22.69	34	1.8e-08	0.00567
GO:0035214	eye-antennal disc development	51	21	7.32	72	2.5e-06	0.00573
GO:0010025	wax biosynthetic process	13	6	1.87	311	0.006	0.006
GO:0042067	establishment of ommatidial planar polarity	50	19	7.18	104	3e-05	0.00618
GO:0070588	calcium ion transmembrane transport	28	10	4.02	271	0.004	0.00626
GO:0042051	compound eye photoreceptor development	81	21	11.63	274	0.00421	0.00626
GO:0035050	embryonic heart tube development	21	8	3.02	316	0.0063	0.0063
GO:0007436	larval salivary gland morphogenesis	10	5	1.44	330	0.00813	0.00813
GO:0022409	positive regulation of cell-cell adhesion	10	5	1.44	331	0.00813	0.00813
GO:0070593	dendrite self-avoidance	10	5	1.44	332	0.00813	0.00813
GO:0042221	response to chemical	788	186	113.14	3	1.2e-13	0.00841
GO:0007455	eye-antennal disc morphogenesis	30	10	4.31	326	0.00699	0.00863
GO:0016318	ommatidial rotation	22	8	3.16	339	0.00867	0.00867
GO:0006030	chitin metabolic process	56	19	8.04	139	0.00018	0.00869
GO:0007416	synapse assembly	149	30	21.39	485	0.03189	0.00903
GO:0035277	spiracle morphogenesis, open tracheal system	18	7	2.58	343	0.00923	0.00923
GO:0044719	regulation of imaginal disc-derived wing size	18	7	2.58	344	0.00923	0.00923
GO:0035336	long-chain fatty-acyl-CoA metabolic process	14	6	2.01	346	0.00925	0.00925
GO:0045494	photoreceptor cell maintenance	14	6	2.01	347	0.00925	0.00925
GO:0035023	regulation of Rho protein signal transduction	30	7	4.31	748	0.12839	0.0093
GO:0035152	regulation of tube architecture, open tracheal system	76	24	10.91	131	9.7e-05	0.00994
GO:0048859	formation of anatomical boundary	42	19	6.03	65	1.4e-06	0.00995
GO:0035215	genital disc development	38	17	5.46	81	6e-06	0.01028
GO:0007380	specification of segmental identity, head	7	4	1.01	351	0.0103	0.0103
GO:0007402	ganglion mother cell fate determination	7	4	1.01	352	0.0103	0.0103
GO:0008584	male gonad development	7	4	1.01	353	0.0103	0.0103
GO:0016057	regulation of membrane potential in photoreceptor cell	7	4	1.01	354	0.0103	0.0103
GO:0061331	epithelial cell proliferation involved in Malpighian tubule morphogenesis	7	4	1.01	355	0.0103	0.0103
GO:0046839	phospholipid dephosphorylation	18	5	2.58	705	0.10409	0.01032
GO:0014017	neuroblast fate commitment	18	11	2.58	82	6.1e-06	0.01037
GO:0001508	action potential	9	7	1.29	108	3.4e-05	0.01045
GO:0007414	axonal defasciculation	9	4	1.29	469	0.02922	0.01053
GO:0031644	regulation of neurological system process	13	4	1.87	696	0.10391	0.01055
GO:1902476	chloride transmembrane transport	23	8	3.3	371	0.01166	0.01166
GO:0043052	thermotaxis	11	5	1.58	380	0.01316	0.01316
GO:0060025	regulation of synaptic activity	11	5	1.58	381	0.01316	0.01316
GO:2000274	regulation of epithelial cell migration, open tracheal system	11	5	1.58	382	0.01316	0.01316
GO:0046928	regulation of neurotransmitter secretion	21	7	3.02	442	0.0229	0.01356
GO:0016319	mushroom body development	63	16	9.05	392	0.01425	0.01425
GO:0007606	sensory perception of chemical stimulus	75	27	10.77	71	2.3e-06	0.01436
GO:0007015	actin filament organization	129	19	18.52	1340	0.49055	0.01484
GO:0016199	axon midline choice point recognition	20	7	2.87	404	0.01737	0.01737
GO:0019233	sensory perception of pain	61	16	8.76	360	0.01041	0.01755
GO:0042659	regulation of cell fate specification	25	10	3.59	223	0.00149	0.01806
GO:0008543	fibroblast growth factor receptor signaling pathway	15	7	2.15	253	0.00276	0.01816
GO:0045924	regulation of female receptivity	16	7	2.3	278	0.00431	0.01817
GO:0009084	glutamine family amino acid biosynthetic process	13	5	1.87	464	0.02865	0.01826
GO:0006941	striated muscle contraction	8	4	1.15	410	0.01828	0.01828
GO:0009642	response to light intensity	8	4	1.15	411	0.01828	0.01828
GO:0016330	second mitotic wave involved in compound eye morphogenesis	8	4	1.15	412	0.01828	0.01828
GO:0050918	positive chemotaxis	8	4	1.15	413	0.01828	0.01828
GO:0061327	anterior Malpighian tubule development	8	4	1.15	414	0.01828	0.01828
GO:0090276	regulation of peptide hormone secretion	8	4	1.15	415	0.01828	0.01828
GO:0006633	fatty acid biosynthetic process	34	11	4.88	314	0.00612	0.01892
GO:0007623	circadian rhythm	129	30	18.52	275	0.0043	0.01903
GO:0035147	branch fusion, open tracheal system	16	6	2.3	422	0.01912	0.01912
GO:0035239	tube morphogenesis	396	88	56.86	87	9.7e-06	0.01939
GO:0048737	imaginal disc-derived appendage development	267	59	38.34	167	0.00034	0.01983
GO:0007509	mesoderm migration involved in gastrulation	12	5	1.72	429	0.01994	0.01994
GO:0042445	hormone metabolic process	49	17	7.04	160	0.00028	0.02027
GO:0030534	adult behavior	124	25	17.8	552	0.04641	0.02038
GO:0030537	larval behavior	35	11	5.03	329	0.0078	0.02043
GO:0050953	sensory perception of light stimulus	24	8	3.45	397	0.01533	0.02049
GO:0019935	cyclic-nucleotide-mediated signaling	34	9	4.88	550	0.04591	0.0205
GO:0040036	regulation of fibroblast growth factor receptor signaling pathway	7	3	1.01	594	0.06598	0.02059
GO:0061041	regulation of wound healing	13	3	1.87	1038	0.28371	0.02062
GO:0007443	Malpighian tubule morphogenesis	37	13	5.31	211	0.00128	0.02082
GO:0006082	organic acid metabolic process	334	40	47.96	2401	0.91417	0.021
GO:0007367	segment polarity determination	30	9	4.31	430	0.02118	0.02118
GO:0021782	glial cell development	30	9	4.31	431	0.02118	0.02118
GO:0007474	imaginal disc-derived wing vein specification	40	11	5.74	439	0.022	0.022
GO:0035159	regulation of tube length, open tracheal system	31	10	4.45	342	0.00902	0.02273
GO:0007426	tracheal outgrowth, open tracheal system	21	7	3.02	443	0.0229	0.0229
GO:0002065	columnar/cuboidal epithelial cell differentiation	288	49	41.35	717	0.1117	0.0232
GO:0010001	glial cell differentiation	35	12	5.03	249	0.00247	0.02326
GO:0010002	cardioblast differentiation	15	8	2.15	168	0.00044	0.02333
GO:1904799	regulation of neuron remodeling	10	5	1.44	333	0.00813	0.02347
GO:0048678	response to axon injury	18	6	2.58	492	0.03446	0.02348
GO:0006723	cuticle hydrocarbon biosynthetic process	5	3	0.72	446	0.02355	0.02355
GO:0007205	protein kinase C-activating G-protein coupled receptor signaling pathway	5	3	0.72	447	0.02355	0.02355
GO:0007451	dorsal/ventral lineage restriction, imaginal disc	5	3	0.72	448	0.02355	0.02355
GO:0007604	phototransduction, UV	5	3	0.72	449	0.02355	0.02355
GO:0042065	glial cell growth	5	3	0.72	450	0.02355	0.02355
GO:0042685	cardioblast cell fate specification	5	3	0.72	451	0.02355	0.02355
GO:0045463	R8 cell development	5	3	0.72	452	0.02355	0.02355
GO:0048104	establishment of body hair or bristle planar orientation	5	3	0.72	453	0.02355	0.02355
GO:0051890	regulation of cardioblast differentiation	5	3	0.72	454	0.02355	0.02355
GO:0060395	SMAD protein signal transduction	5	3	0.72	455	0.02355	0.02355
GO:0060402	calcium ion transport into cytosol	5	3	0.72	456	0.02355	0.02355
GO:0097191	extrinsic apoptotic signaling pathway	5	3	0.72	457	0.02355	0.02355
GO:0034220	ion transmembrane transport	213	54	30.58	90	1.2e-05	0.02645
GO:0045926	negative regulation of growth	93	19	13.35	621	0.06754	0.02838
GO:0006517	protein deglycosylation	13	5	1.87	465	0.02865	0.02865
GO:0045938	positive regulation of circadian sleep/wake cycle, sleep	13	5	1.87	466	0.02865	0.02865
GO:0050805	negative regulation of synaptic transmission	18	10	2.58	118	5.2e-05	0.02878
GO:0007427	epithelial cell migration, open tracheal system	33	12	4.74	216	0.00138	0.02907
GO:0009593	detection of chemical stimulus	17	6	2.44	461	0.02605	0.02914
GO:0048100	wing disc anterior/posterior pattern formation	9	4	1.29	470	0.02922	0.02922
GO:0071322	cellular response to carbohydrate stimulus	9	4	1.29	471	0.02922	0.02922
GO:0007632	visual behavior	22	7	3.16	474	0.02954	0.02954
GO:0040003	chitin-based cuticle development	82	21	11.77	288	0.00492	0.03033
GO:0016203	muscle attachment	34	11	4.88	315	0.00612	0.03098
GO:0008586	imaginal disc-derived wing vein morphogenesis	42	11	6.03	483	0.03116	0.03116
GO:0055085	transmembrane transport	447	95	64.18	103	2.9e-05	0.03266
GO:0048085	adult chitin-containing cuticle pigmentation	28	7	4.02	689	0.09585	0.03452
GO:0008345	larval locomotory behavior	23	7	3.3	503	0.03737	0.03737
GO:0035206	regulation of hemocyte proliferation	34	10	4.88	406	0.01784	0.03827
GO:0007409	axonogenesis	271	79	38.91	9	1.1e-10	0.03868
GO:0007464	R3/R4 cell fate commitment	14	5	2.01	508	0.03944	0.03944
GO:0007610	behavior	423	90	60.73	113	4.6e-05	0.03962
GO:0035220	wing disc development	306	59	43.94	350	0.0094	0.04002
GO:0098609	cell-cell adhesion	89	32	12.78	50	2.7e-07	0.04105
GO:0007480	imaginal disc-derived leg morphogenesis	65	19	9.33	218	0.00144	0.04147
GO:0085029	extracellular matrix assembly	17	10	2.44	101	2.7e-05	0.04154
GO:0007365	periodic partitioning	36	12	5.17	263	0.00323	0.04162
GO:0007603	phototransduction, visible light	25	9	3.59	306	0.00588	0.04177
GO:0045455	ecdysteroid metabolic process	28	9	4.02	387	0.01333	0.04181
GO:0001746	Bolwig's organ morphogenesis	6	3	0.86	512	0.04212	0.04212
GO:0001764	neuron migration	6	3	0.86	513	0.04212	0.04212
GO:0006013	mannose metabolic process	6	3	0.86	514	0.04212	0.04212
GO:0010496	intercellular transport	6	3	0.86	515	0.04212	0.04212
GO:0010862	positive regulation of pathway-restricted SMAD protein phosphorylation	6	3	0.86	516	0.04212	0.04212
GO:0010888	negative regulation of lipid storage	6	3	0.86	517	0.04212	0.04212
GO:0016202	regulation of striated muscle tissue development	6	3	0.86	518	0.04212	0.04212
GO:0032528	microvillus organization	6	3	0.86	519	0.04212	0.04212
GO:0035074	pupation	6	3	0.86	520	0.04212	0.04212
GO:0035155	negative regulation of terminal cell fate specification, open tracheal system	6	3	0.86	521	0.04212	0.04212
GO:0035156	fusion cell fate specification	6	3	0.86	522	0.04212	0.04212
GO:0035292	specification of segmental identity, trunk	6	3	0.86	523	0.04212	0.04212
GO:0042908	xenobiotic transport	6	3	0.86	524	0.04212	0.04212
GO:0043266	regulation of potassium ion transport	6	3	0.86	525	0.04212	0.04212
GO:0046688	response to copper ion	6	3	0.86	526	0.04212	0.04212
GO:0048562	embryonic organ morphogenesis	6	3	0.86	527	0.04212	0.04212
GO:0048636	positive regulation of muscle organ development	6	3	0.86	528	0.04212	0.04212
GO:0097206	nephrocyte filtration	6	3	0.86	529	0.04212	0.04212
GO:0007043	cell-cell junction assembly	51	6	7.32	1981	0.76032	0.04249
GO:0006814	sodium ion transport	27	9	3.88	358	0.01033	0.04293
GO:0050773	regulation of dendrite development	40	10	5.74	559	0.05201	0.04305
GO:0007271	synaptic transmission, cholinergic	15	5	2.15	561	0.05237	0.04324
GO:0003341	cilium movement	10	4	1.44	540	0.04328	0.04328
GO:0031290	retinal ganglion cell axon guidance	10	4	1.44	541	0.04328	0.04328
GO:0035160	maintenance of epithelial integrity, open tracheal system	10	4	1.44	542	0.04328	0.04328
GO:0070509	calcium ion import	10	4	1.44	543	0.04328	0.04328
GO:0007422	peripheral nervous system development	74	16	10.63	577	0.05771	0.0443
GO:0046716	muscle cell cellular homeostasis	24	7	3.45	553	0.04644	0.04644
GO:0048513	animal organ development	968	193	138.99	48	2e-07	0.04993
GO:0071711	basement membrane organization	15	5	2.15	562	0.05237	0.05237
GO:0048732	gland development	151	40	21.68	121	5.8e-05	0.05417
GO:0006813	potassium ion transport	46	22	6.6	42	5.8e-08	0.05449
GO:0051960	regulation of nervous system development	262	47	37.62	580	0.05857	0.05507
GO:0030855	epithelial cell differentiation	347	59	49.82	664	0.08877	0.05508
GO:0022404	molting cycle process	48	16	6.89	188	0.00071	0.05513
GO:0010648	negative regulation of cell communication	278	48	39.92	686	0.09508	0.05521
GO:0023057	negative regulation of signaling	278	48	39.92	687	0.09508	0.05521
GO:0042737	drug catabolic process	51	16	7.32	221	0.00148	0.0555
GO:0008015	blood circulation	28	8	4.02	507	0.03848	0.05565
GO:0044550	secondary metabolite biosynthetic process	26	7	3.73	622	0.06849	0.05572
GO:0035265	organ growth	61	12	8.76	818	0.15685	0.05572
GO:0061319	nephrocyte differentiation	10	4	1.44	544	0.04328	0.05579
GO:0048665	neuron fate specification	12	4	1.72	641	0.08075	0.05582
GO:0046068	cGMP metabolic process	17	4	2.44	942	0.21967	0.05589
GO:0007450	dorsal/ventral pattern formation, imaginal disc	45	8	6.46	1070	0.3146	0.05589
GO:0014009	glial cell proliferation	12	3	1.72	957	0.24222	0.05592
GO:0002758	innate immune response-activating signal transduction	13	3	1.87	1039	0.28371	0.05593
GO:0097306	cellular response to alcohol	20	4	2.87	1072	0.32116	0.05594
GO:0007362	terminal region determination	20	6	2.87	571	0.05603	0.05603
GO:0007614	short-term memory	20	6	2.87	572	0.05603	0.05603
GO:0045216	cell-cell junction organization	75	10	10.77	1656	0.65056	0.05613
GO:0042327	positive regulation of phosphorylation	137	17	19.67	1999	0.77898	0.05633
GO:0045786	negative regulation of cell cycle	94	7	13.5	2747	0.98702	0.05672
GO:0007398	ectoderm development	25	7	3.59	574	0.0568	0.0568
GO:0006697	ecdysone biosynthetic process	11	4	1.58	586	0.06048	0.06048
GO:0007412	axon target recognition	11	4	1.58	587	0.06048	0.06048
GO:0016079	synaptic vesicle exocytosis	48	8	6.89	1205	0.38345	0.06072
GO:0045595	regulation of cell differentiation	290	55	41.64	400	0.01635	0.0641
GO:0048066	developmental pigmentation	93	25	13.35	207	0.00108	0.06443
GO:0035309	wing and notum subfield formation	12	7	1.72	175	0.0005	0.06546
GO:0042749	regulation of circadian sleep/wake cycle	30	9	4.31	432	0.02118	0.06555
GO:0003401	axis elongation	7	3	1.01	595	0.06598	0.06598
GO:0006011	UDP-glucose metabolic process	7	3	1.01	596	0.06598	0.06598
GO:0006541	glutamine metabolic process	7	3	1.01	597	0.06598	0.06598
GO:0007438	oenocyte development	7	3	1.01	598	0.06598	0.06598
GO:0009395	phospholipid catabolic process	7	3	1.01	599	0.06598	0.06598
GO:0016204	determination of muscle attachment site	7	3	1.01	600	0.06598	0.06598
GO:0016486	peptide hormone processing	7	3	1.01	601	0.06598	0.06598
GO:0021675	nerve development	7	3	1.01	602	0.06598	0.06598
GO:0032414	positive regulation of ion transmembrane transporter activity	7	3	1.01	603	0.06598	0.06598
GO:0048789	cytoskeletal matrix organization at active zone	7	3	1.01	604	0.06598	0.06598
GO:0051180	vitamin transport	7	3	1.01	605	0.06598	0.06598
GO:0055083	monovalent inorganic anion homeostasis	7	3	1.01	606	0.06598	0.06598
GO:0097104	postsynaptic membrane assembly	7	3	1.01	607	0.06598	0.06598
GO:0090101	negative regulation of transmembrane receptor protein serine/threonine kinase signaling pathway	20	4	2.87	1073	0.32116	0.06612
GO:0042761	very long-chain fatty acid biosynthetic process	16	5	2.3	614	0.06748	0.06748
GO:0048813	dendrite morphogenesis	131	33	18.81	187	0.00067	0.0675
GO:0007424	open tracheal system development	200	55	28.72	61	6.9e-07	0.06987
GO:0045214	sarcomere organization	32	8	4.59	635	0.07782	0.07782
GO:0007169	transmembrane receptor protein tyrosine kinase signaling pathway	155	33	22.26	369	0.01153	0.07892
GO:0019722	calcium-mediated signaling	17	5	2.44	654	0.08475	0.08069
GO:0010107	potassium ion import	12	4	1.72	642	0.08075	0.08075
GO:0048814	regulation of dendrite morphogenesis	27	6	3.88	862	0.1816	0.08487
GO:0007369	gastrulation	64	15	9.19	498	0.03456	0.09373
GO:0045466	R7 cell differentiation	50	10	7.18	855	0.17175	0.09439
GO:0005975	carbohydrate metabolic process	211	32	30.3	1215	0.3971	0.09453
GO:0007158	neuron cell-cell adhesion	8	3	1.15	670	0.0946	0.0946
GO:0007440	foregut morphogenesis	8	3	1.15	671	0.0946	0.0946
GO:0007458	progression of morphogenetic furrow involved in compound eye morphogenesis	8	3	1.15	672	0.0946	0.0946
GO:0007638	mechanosensory behavior	8	3	1.15	673	0.0946	0.0946
GO:0008343	adult feeding behavior	8	3	1.15	674	0.0946	0.0946
GO:0045705	negative regulation of salivary gland boundary specification	8	3	1.15	675	0.0946	0.0946
GO:0046855	inositol phosphate dephosphorylation	8	3	1.15	676	0.0946	0.0946
GO:0060026	convergent extension	8	3	1.15	677	0.0946	0.0946
GO:0097105	presynaptic membrane assembly	8	3	1.15	678	0.0946	0.0946
GO:1903531	negative regulation of secretion by cell	8	3	1.15	679	0.0946	0.0946
GO:0003007	heart morphogenesis	33	8	4.74	667	0.09041	0.09574
GO:0006909	phagocytosis	50	8	7.18	1240	0.42982	0.09668
GO:0048749	compound eye development	304	66	43.65	155	0.00026	0.0969
GO:0007522	visceral muscle development	12	8	1.72	116	5.1e-05	0.1004
GO:0098661	inorganic anion transmembrane transport	27	10	3.88	260	0.00294	0.10042
GO:0007635	chemosensory behavior	64	15	9.19	499	0.03456	0.10047
GO:0007354	zygotic determination of anterior/posterior axis, embryo	24	8	3.45	398	0.01533	0.1007
GO:0006726	eye pigment biosynthetic process	34	9	4.88	551	0.04591	0.10077
GO:0009755	hormone-mediated signaling pathway	35	9	5.03	570	0.05424	0.1008
GO:0022410	circadian sleep/wake cycle process	29	8	4.16	555	0.0467	0.10082
GO:0006873	cellular ion homeostasis	106	19	15.22	860	0.1784	0.10083
GO:0097305	response to alcohol	108	19	15.51	893	0.20099	0.10088
GO:0007485	imaginal disc-derived male genitalia development	18	6	2.58	493	0.03446	0.10089
GO:0030539	male genitalia development	18	6	2.58	494	0.03446	0.10089
GO:0016056	rhodopsin mediated signaling pathway	19	6	2.73	549	0.04443	0.10092
GO:0050909	sensory perception of taste	9	3	1.29	736	0.12729	0.10119
GO:0017001	antibiotic catabolic process	10	3	1.44	835	0.1633	0.10122
GO:0071684	organism emergence from protective structure	20	4	2.87	1074	0.32116	0.10129
GO:0035162	embryonic hemopoiesis	21	4	3.02	1153	0.35596	0.10132
GO:0007189	adenylate cyclase-activating G-protein coupled receptor signaling pathway	18	5	2.58	706	0.10409	0.10383
GO:0019367	fatty acid elongation, saturated fatty acid	13	4	1.87	697	0.10391	0.10391
GO:0034625	fatty acid elongation, monounsaturated fatty acid	13	4	1.87	698	0.10391	0.10391
GO:0034626	fatty acid elongation, polyunsaturated fatty acid	13	4	1.87	699	0.10391	0.10391
GO:0035002	liquid clearance, open tracheal system	13	4	1.87	700	0.10391	0.10391
GO:0043401	steroid hormone mediated signaling pathway	27	6	3.88	863	0.1816	0.10391
GO:0007475	apposition of dorsal and ventral imaginal disc-derived wing surfaces	18	5	2.58	707	0.10409	0.10409
GO:0035293	chitin-based larval cuticle pattern formation	18	5	2.58	708	0.10409	0.10409
GO:0009617	response to bacterium	170	19	24.41	2391	0.90808	0.10613
GO:0008407	chaeta morphogenesis	29	7	4.16	714	0.11149	0.11149
GO:0008355	olfactory learning	38	8	5.46	853	0.16931	0.11162
GO:0009416	response to light stimulus	127	34	18.23	136	0.00016	0.1233
GO:0006812	cation transport	209	49	30.01	154	0.00025	0.12374
GO:0048565	digestive tract development	85	26	12.2	129	9.1e-05	0.12388
GO:0008362	chitin-based embryonic cuticle biosynthetic process	19	5	2.73	727	0.1254	0.1254
GO:0045167	asymmetric protein localization involved in cell fate determination	19	5	2.73	728	0.1254	0.1254
GO:0045467	R7 cell development	19	5	2.73	729	0.1254	0.1254
GO:0009952	anterior/posterior pattern specification	148	27	21.25	711	0.10911	0.12613
GO:0035222	wing disc pattern formation	60	14	8.61	511	0.04171	0.12625
GO:0007519	skeletal muscle tissue development	9	3	1.29	737	0.12729	0.12729
GO:0035690	cellular response to drug	9	3	1.29	738	0.12729	0.12729
GO:0040015	negative regulation of multicellular organism growth	9	3	1.29	739	0.12729	0.12729
GO:0050708	regulation of protein secretion	20	4	2.87	1075	0.32116	0.12745
GO:0043408	regulation of MAPK cascade	132	17	18.95	1893	0.72441	0.12834
GO:0006520	cellular amino acid metabolic process	145	16	20.82	2352	0.90201	0.12916
GO:0048731	system development	1416	288	203.31	4	3.6e-12	0.12933
GO:0007268	chemical synaptic transmission	234	52	33.6	184	0.00065	0.12953
GO:0016059	deactivation of rhodopsin mediated signaling	14	4	2.01	750	0.1297	0.1297
GO:0048803	imaginal disc-derived male genitalia morphogenesis	14	4	2.01	751	0.1297	0.1297
GO:0006869	lipid transport	58	10	8.33	1071	0.31711	0.1298
GO:0016310	phosphorylation	503	60	72.22	2574	0.95576	0.13498
GO:0035295	tube development	568	125	81.55	49	2e-07	0.13725
GO:0007274	neuromuscular synaptic transmission	67	19	9.62	243	0.00213	0.13741
GO:0120039	plasma membrane bounded cell projection morphogenesis	365	95	52.41	20	1.3e-09	0.13756
GO:0060562	epithelial tube morphogenesis	368	82	52.84	96	1.8e-05	0.1395
GO:0008038	neuron recognition	85	34	12.2	29	5e-09	0.14068
GO:0007449	proximal/distal pattern formation, imaginal disc	15	12	2.15	36	2.2e-08	0.14235
GO:0055080	cation homeostasis	126	26	18.09	490	0.0332	0.1426
GO:0043269	regulation of ion transport	40	13	5.74	256	0.00285	0.1427
GO:0055074	calcium ion homeostasis	39	12	5.6	325	0.0067	0.14282
GO:0009584	detection of visible light	33	11	4.74	286	0.00474	0.14284
GO:0051046	regulation of secretion	69	16	9.91	489	0.03254	0.14286
GO:0120035	regulation of plasma membrane bounded cell projection organization	109	21	15.65	669	0.09431	0.14296
GO:0016198	axon choice point recognition	21	8	3.02	317	0.0063	0.14301
GO:0048512	circadian behavior	84	17	12.06	662	0.08651	0.14302
GO:0034765	regulation of ion transmembrane transport	18	6	2.58	495	0.03446	0.14323
GO:0009589	detection of UV	6	4	0.86	296	0.00498	0.14327
GO:0001742	oenocyte differentiation	8	4	1.15	416	0.01828	0.14331
GO:0007483	genital disc morphogenesis	16	5	2.3	615	0.06748	0.14333
GO:0035112	genitalia morphogenesis	16	5	2.3	616	0.06748	0.14333
GO:0046154	rhodopsin metabolic process	16	5	2.3	617	0.06748	0.14333
GO:0008645	hexose transmembrane transport	17	5	2.44	655	0.08475	0.14335
GO:0046668	regulation of retinal cell programmed cell death	17	5	2.44	656	0.08475	0.14335
GO:0007621	negative regulation of female receptivity	6	3	0.86	530	0.04212	0.14341
GO:0035168	larval lymph gland hemocyte differentiation	13	4	1.87	701	0.10391	0.14341
GO:0072091	regulation of stem cell proliferation	49	9	7.04	987	0.26458	0.14343
GO:0008052	sensory organ boundary specification	15	4	2.15	820	0.15781	0.14345
GO:0050921	positive regulation of chemotaxis	9	3	1.29	740	0.12729	0.14346
GO:0015849	organic acid transport	65	11	9.33	1136	0.32682	0.14347
GO:0021700	developmental maturation	205	31	29.43	1223	0.40639	0.14348
GO:0010721	negative regulation of cell development	67	11	9.62	1164	0.36514	0.14351
GO:0007586	digestion	6	2	0.86	912	0.20849	0.14354
GO:0021953	central nervous system neuron differentiation	6	2	0.86	913	0.20849	0.14354
GO:0007439	ectodermal digestive tract development	8	2	1.15	1086	0.32247	0.14358
GO:0046500	S-adenosylmethionine metabolic process	8	2	1.15	1087	0.32247	0.14358
GO:0048753	pigment granule organization	9	2	1.29	1179	0.37823	0.1436
GO:1903312	negative regulation of mRNA metabolic process	10	2	1.44	1242	0.43196	0.14362
GO:0048139	female germ-line cyst encapsulation	11	2	1.58	1313	0.4831	0.14364
GO:0045859	regulation of protein kinase activity	84	12	12.06	1493	0.55547	0.14371
GO:0035194	posttranscriptional gene silencing by RNA	51	4	7.32	2535	0.94763	0.14416
GO:1901698	response to nitrogen compound	125	14	17.95	2297	0.87618	0.14425
GO:0046395	carboxylic acid catabolic process	86	6	12.35	2767	0.98915	0.14458
GO:0007218	neuropeptide signaling pathway	31	7	4.45	769	0.14648	0.14648
GO:0042059	negative regulation of epidermal growth factor receptor signaling pathway	31	7	4.45	770	0.14648	0.14648
GO:0009056	catabolic process	768	79	110.27	2953	0.99983	0.1485
GO:0035149	lumen formation, open tracheal system	20	5	2.87	773	0.14852	0.14852
GO:0070887	cellular response to chemical stimulus	314	62	45.08	282	0.0046	0.14901
GO:0048865	stem cell fate commitment	26	14	3.73	73	2.6e-06	0.15081
GO:0042753	positive regulation of circadian rhythm	18	7	2.58	345	0.00923	0.15226
GO:0060179	male mating behavior	46	11	6.6	576	0.05699	0.15226
GO:0042684	cardioblast cell fate commitment	10	5	1.44	334	0.00813	0.15247
GO:0035290	trunk segmentation	11	5	1.58	383	0.01316	0.15251
GO:0046847	filopodium assembly	36	7	5.17	976	0.25211	0.1529
GO:0016043	cellular component organization	2219	272	318.61	2941	0.99973	0.15292
GO:0002792	negative regulation of peptide secretion	5	2	0.72	781	0.15303	0.15303
GO:0006551	leucine metabolic process	5	2	0.72	782	0.15303	0.15303
GO:0006689	ganglioside catabolic process	5	2	0.72	783	0.15303	0.15303
GO:0007486	imaginal disc-derived female genitalia development	5	2	0.72	784	0.15303	0.15303
GO:0007561	imaginal disc eversion	5	2	0.72	785	0.15303	0.15303
GO:0010171	body morphogenesis	5	2	0.72	786	0.15303	0.15303
GO:0015837	amine transport	5	2	0.72	787	0.15303	0.15303
GO:0016601	Rac protein signal transduction	5	2	0.72	788	0.15303	0.15303
GO:0023058	adaptation of signaling pathway	5	2	0.72	789	0.15303	0.15303
GO:0032469	endoplasmic reticulum calcium ion homeostasis	5	2	0.72	790	0.15303	0.15303
GO:0032780	negative regulation of ATPase activity	5	2	0.72	791	0.15303	0.15303
GO:0034453	microtubule anchoring	5	2	0.72	792	0.15303	0.15303
GO:0035001	dorsal trunk growth, open tracheal system	5	2	0.72	793	0.15303	0.15303
GO:0035736	cell proliferation involved in compound eye morphogenesis	5	2	0.72	794	0.15303	0.15303
GO:0038061	NIK/NF-kappaB signaling	5	2	0.72	795	0.15303	0.15303
GO:0042688	crystal cell differentiation	5	2	0.72	796	0.15303	0.15303
GO:0045434	negative regulation of female receptivity, post-mating	5	2	0.72	797	0.15303	0.15303
GO:0046663	dorsal closure, leading edge cell differentiation	5	2	0.72	798	0.15303	0.15303
GO:0046692	sperm competition	5	2	0.72	799	0.15303	0.15303
GO:0048052	R1/R6 cell differentiation	5	2	0.72	800	0.15303	0.15303
GO:0048076	regulation of compound eye pigmentation	5	2	0.72	801	0.15303	0.15303
GO:0050886	endocrine process	5	2	0.72	802	0.15303	0.15303
GO:0051282	regulation of sequestering of calcium ion	5	2	0.72	803	0.15303	0.15303
GO:0051780	behavioral response to nutrient	5	2	0.72	804	0.15303	0.15303
GO:0071260	cellular response to mechanical stimulus	5	2	0.72	805	0.15303	0.15303
GO:0090098	positive regulation of decapentaplegic signaling pathway	5	2	0.72	806	0.15303	0.15303
GO:0097327	response to antineoplastic agent	5	2	0.72	807	0.15303	0.15303
GO:1904801	positive regulation of neuron remodeling	5	2	0.72	808	0.15303	0.15303
GO:0033500	carbohydrate homeostasis	35	6	5.03	1209	0.38844	0.15311
GO:2000647	negative regulation of stem cell proliferation	36	4	5.17	2009	0.78037	0.15364
GO:0042981	regulation of apoptotic process	180	25	25.84	1545	0.60516	0.15367
GO:0051129	negative regulation of cellular component organization	136	18	19.53	1757	0.68388	0.15374
GO:0009636	response to toxic substance	122	26	17.52	441	0.02287	0.15511
GO:0031329	regulation of cellular catabolic process	148	13	21.25	2743	0.98558	0.15544
GO:0000902	cell morphogenesis	466	113	66.91	26	3.1e-09	0.15566
GO:0007431	salivary gland development	109	35	15.65	66	1.7e-06	0.15714
GO:0050790	regulation of catalytic activity	292	27	41.93	2866	0.99713	0.15722
GO:0007160	cell-matrix adhesion	15	4	2.15	821	0.15781	0.15781
GO:0016063	rhodopsin biosynthetic process	15	4	2.15	822	0.15781	0.15781
GO:0016266	O-glycan processing	15	4	2.15	823	0.15781	0.15781
GO:0008587	imaginal disc-derived wing margin morphogenesis	44	11	6.32	539	0.04274	0.1581
GO:0006816	calcium ion transport	48	14	6.89	309	0.006	0.16138
GO:1900073	regulation of neuromuscular synaptic transmission	19	9	2.73	182	0.0006	0.16168
GO:0050803	regulation of synapse structure or activity	145	27	20.82	666	0.09018	0.16168
GO:0071482	cellular response to light stimulus	37	11	5.31	374	0.01219	0.16187
GO:0030509	BMP signaling pathway	39	8	5.6	883	0.18799	0.16301
GO:0007601	visual perception	19	5	2.73	730	0.1254	0.16305
GO:0035249	synaptic transmission, glutamatergic	16	4	2.3	872	0.18792	0.16325
GO:0007460	R8 cell fate commitment	10	3	1.44	836	0.1633	0.1633
GO:0007628	adult walking behavior	10	3	1.44	837	0.1633	0.1633
GO:0009744	response to sucrose	10	3	1.44	838	0.1633	0.1633
GO:0010977	negative regulation of neuron projection development	10	3	1.44	839	0.1633	0.1633
GO:0019236	response to pheromone	10	3	1.44	840	0.1633	0.1633
GO:0030322	stabilization of membrane potential	10	3	1.44	841	0.1633	0.1633
GO:0035158	regulation of tube diameter, open tracheal system	10	3	1.44	842	0.1633	0.1633
GO:0042676	compound eye cone cell fate commitment	10	3	1.44	843	0.1633	0.1633
GO:0006952	defense response	298	36	42.79	2337	0.89251	0.16629
GO:0035556	intracellular signal transduction	572	73	82.13	2314	0.88528	0.16679
GO:0030036	actin cytoskeleton organization	238	34	34.17	1486	0.54206	0.17438
GO:0051124	synaptic growth at neuromuscular junction	118	21	16.94	857	0.17207	0.18047
GO:0007399	nervous system development	904	197	129.8	8	6.3e-11	0.18138
GO:0008347	glial cell migration	27	6	3.88	864	0.1816	0.1816
GO:0046323	glucose import	16	4	2.3	873	0.18792	0.18792
GO:0033674	positive regulation of kinase activity	70	10	10.05	1498	0.55924	0.18873
GO:0007224	smoothened signaling pathway	50	6	7.18	1910	0.74293	0.18926
GO:0007417	central nervous system development	204	50	29.29	126	6.7e-05	0.19193
GO:0042048	olfactory behavior	60	13	8.61	638	0.08058	0.19808
GO:0001654	eye development	322	74	46.23	94	1.5e-05	0.19969
GO:0001666	response to hypoxia	46	7	6.6	1358	0.49745	0.20029
GO:0035017	cuticle pattern formation	29	8	4.16	556	0.0467	0.20087
GO:0051240	positive regulation of multicellular organismal process	179	34	25.7	557	0.04999	0.20096
GO:0009996	negative regulation of cell fate specification	17	6	2.44	462	0.02605	0.20098
GO:0040014	regulation of multicellular organism growth	41	9	5.89	725	0.12395	0.20116
GO:0060070	canonical Wnt signaling pathway	66	12	9.48	954	0.23146	0.2014
GO:0002027	regulation of heart rate	11	3	1.58	895	0.20185	0.20185
GO:0007200	phospholipase C-activating G-protein coupled receptor signaling pathway	11	3	1.58	896	0.20185	0.20185
GO:0007428	primary branching, open tracheal system	11	3	1.58	897	0.20185	0.20185
GO:0019432	triglyceride biosynthetic process	11	3	1.58	898	0.20185	0.20185
GO:0030510	regulation of BMP signaling pathway	29	5	4.16	1219	0.40534	0.20209
GO:0007525	somatic muscle development	65	10	9.33	1295	0.45973	0.20581
GO:0008344	adult locomotory behavior	64	12	9.19	890	0.20003	0.20672
GO:0008258	head involution	34	7	4.88	907	0.2072	0.2072
GO:0046514	ceramide catabolic process	11	4	1.58	588	0.06048	0.20809
GO:0015850	organic hydroxy compound transport	26	6	3.73	833	0.15935	0.20813
GO:0050919	negative chemotaxis	16	4	2.3	874	0.18792	0.20831
GO:0072348	sulfur compound transport	16	4	2.3	875	0.18792	0.20831
GO:0001710	mesodermal cell fate commitment	6	2	0.86	914	0.20849	0.20849
GO:0006047	UDP-N-acetylglucosamine metabolic process	6	2	0.86	915	0.20849	0.20849
GO:0006817	phosphate ion transport	6	2	0.86	916	0.20849	0.20849
GO:0007506	gonadal mesoderm development	6	2	0.86	917	0.20849	0.20849
GO:0010469	regulation of signaling receptor activity	6	2	0.86	918	0.20849	0.20849
GO:0030336	negative regulation of cell migration	6	2	0.86	919	0.20849	0.20849
GO:0032875	regulation of DNA endoreduplication	6	2	0.86	920	0.20849	0.20849
GO:0033559	unsaturated fatty acid metabolic process	6	2	0.86	921	0.20849	0.20849
GO:0034067	protein localization to Golgi apparatus	6	2	0.86	922	0.20849	0.20849
GO:0034446	substrate adhesion-dependent cell spreading	6	2	0.86	923	0.20849	0.20849
GO:0035207	negative regulation of hemocyte proliferation	6	2	0.86	924	0.20849	0.20849
GO:0043393	regulation of protein binding	6	2	0.86	925	0.20849	0.20849
GO:0043470	regulation of carbohydrate catabolic process	6	2	0.86	926	0.20849	0.20849
GO:0044036	cell wall macromolecule metabolic process	6	2	0.86	927	0.20849	0.20849
GO:0046665	amnioserosa maintenance	6	2	0.86	928	0.20849	0.20849
GO:0048036	central complex development	6	2	0.86	929	0.20849	0.20849
GO:0048087	positive regulation of developmental pigmentation	6	2	0.86	930	0.20849	0.20849
GO:0060079	excitatory postsynaptic potential	6	2	0.86	931	0.20849	0.20849
GO:0071236	cellular response to antibiotic	6	2	0.86	932	0.20849	0.20849
GO:1900087	positive regulation of G1/S transition of mitotic cell cycle	6	2	0.86	933	0.20849	0.20849
GO:0000086	G2/M transition of mitotic cell cycle	34	5	4.88	1489	0.5512	0.20882
GO:0007423	sensory organ development	383	85	54.99	91	1.5e-05	0.20923
GO:0030716	oocyte fate determination	34	3	4.88	2311	0.88498	0.20946
GO:0007179	transforming growth factor beta receptor signaling pathway	17	4	2.44	943	0.21967	0.21967
GO:0071705	nitrogen compound transport	491	37	70.5	3026	1	0.22034
GO:0008049	male courtship behavior	41	9	5.89	726	0.12395	0.22607
GO:0033227	dsRNA transport	23	5	3.3	949	0.22692	0.22692
GO:0001751	compound eye photoreceptor cell differentiation	140	35	20.1	178	0.00054	0.23583
GO:0007186	G-protein coupled receptor signaling pathway	136	31	19.53	304	0.00513	0.23632
GO:0030707	ovarian follicle cell development	282	46	40.49	885	0.19143	0.23725
GO:0007016	cytoskeletal anchoring at plasma membrane	12	3	1.72	958	0.24222	0.24222
GO:0035567	non-canonical Wnt signaling pathway	12	3	1.72	959	0.24222	0.24222
GO:0035725	sodium ion transmembrane transport	12	3	1.72	960	0.24222	0.24222
GO:0050975	sensory perception of touch	12	3	1.72	961	0.24222	0.24222
GO:0072375	medium-term memory	12	3	1.72	962	0.24222	0.24222
GO:0001709	cell fate determination	120	32	17.23	158	0.00027	0.2451
GO:0001700	embryonic development via the syncytial blastoderm	152	26	21.82	886	0.19308	0.25024
GO:0042052	rhabdomere development	36	7	5.17	977	0.25211	0.25211
GO:0045433	male courtship behavior, veined wing generated song production	18	4	2.58	980	0.25269	0.25269
GO:0008293	torso signaling pathway	24	5	3.45	986	0.25538	0.25538
GO:0006915	apoptotic process	231	33	33.17	1487	0.54227	0.25652
GO:0048736	appendage development	271	60	38.91	161	0.00029	0.26159
GO:0048592	eye morphogenesis	257	58	36.9	145	0.00021	0.2616
GO:0048608	reproductive structure development	67	27	9.62	46	1.6e-07	0.26261
GO:0035218	leg disc development	79	27	11.34	83	7.1e-06	0.26302
GO:0006936	muscle contraction	23	8	3.3	372	0.01166	0.26409
GO:0048645	animal organ formation	42	17	6.03	106	3e-05	0.26414
GO:0007478	leg disc morphogenesis	67	20	9.62	197	0.00082	0.26427
GO:0017085	response to insecticide	14	6	2.01	348	0.00925	0.26436
GO:0042462	eye photoreceptor cell development	84	22	12.06	261	0.00301	0.26437
GO:0033993	response to lipid	64	13	9.19	722	0.12028	0.26442
GO:0008101	decapentaplegic signaling pathway	17	5	2.44	657	0.08475	0.2649
GO:0048864	stem cell development	16	9	2.3	134	0.00011	0.26515
GO:0045664	regulation of neuron differentiation	122	24	17.52	591	0.06394	0.26519
GO:0009649	entrainment of circadian clock	16	4	2.3	876	0.18792	0.26523
GO:0048332	mesoderm morphogenesis	21	9	3.02	219	0.00145	0.26532
GO:1901072	glucosamine-containing compound catabolic process	22	9	3.16	244	0.00214	0.26536
GO:0007622	rhythmic behavior	86	18	12.35	590	0.06063	0.26539
GO:0060438	trachea development	12	3	1.72	963	0.24222	0.26539
GO:0046661	male sex differentiation	24	9	3.45	276	0.0043	0.26542
GO:0048806	genitalia development	25	9	3.59	307	0.00588	0.26546
GO:0001707	mesoderm formation	19	8	2.73	262	0.00305	0.26549
GO:0002028	regulation of sodium ion transport	7	2	1.01	988	0.2655	0.2655
GO:0006123	mitochondrial electron transport, cytochrome c to oxygen	7	2	1.01	989	0.2655	0.2655
GO:0006509	membrane protein ectodomain proteolysis	7	2	1.01	990	0.2655	0.2655
GO:0006825	copper ion transport	7	2	1.01	991	0.2655	0.2655
GO:0007386	compartment pattern specification	7	2	1.01	992	0.2655	0.2655
GO:0007516	hemocyte development	7	2	1.01	993	0.2655	0.2655
GO:0010771	negative regulation of cell morphogenesis involved in differentiation	7	2	1.01	994	0.2655	0.2655
GO:0019934	cGMP-mediated signaling	7	2	1.01	995	0.2655	0.2655
GO:0030856	regulation of epithelial cell differentiation	7	2	1.01	996	0.2655	0.2655
GO:0031034	myosin filament assembly	7	2	1.01	997	0.2655	0.2655
GO:0032413	negative regulation of ion transmembrane transporter activity	7	2	1.01	998	0.2655	0.2655
GO:0035262	gonad morphogenesis	7	2	1.01	999	0.2655	0.2655
GO:0035289	posterior head segmentation	7	2	1.01	1000	0.2655	0.2655
GO:0046672	positive regulation of compound eye retinal cell programmed cell death	7	2	1.01	1001	0.2655	0.2655
GO:0050965	detection of temperature stimulus involved in sensory perception of pain	7	2	1.01	1002	0.2655	0.2655
GO:0060250	germ-line stem-cell niche homeostasis	7	2	1.01	1003	0.2655	0.2655
GO:0060571	morphogenesis of an epithelial fold	7	2	1.01	1004	0.2655	0.2655
GO:0061320	pericardial nephrocyte differentiation	7	2	1.01	1005	0.2655	0.2655
GO:0070286	axonemal dynein complex assembly	7	2	1.01	1006	0.2655	0.2655
GO:1901019	regulation of calcium ion transmembrane transporter activity	7	2	1.01	1007	0.2655	0.2655
GO:1903035	negative regulation of response to wounding	7	2	1.01	1008	0.2655	0.2655
GO:1903578	regulation of ATP metabolic process	7	2	1.01	1009	0.2655	0.2655
GO:1904063	negative regulation of cation transmembrane transport	7	2	1.01	1010	0.2655	0.2655
GO:0042745	circadian sleep/wake cycle	34	10	4.88	407	0.01784	0.26553
GO:0030703	eggshell formation	107	20	15.36	734	0.12685	0.26563
GO:0090100	positive regulation of transmembrane receptor protein serine/threonine kinase signaling pathway	17	7	2.44	323	0.00643	0.26566
GO:0009948	anterior/posterior axis specification	123	18	17.66	1360	0.50463	0.26575
GO:0060911	cardiac cell fate commitment	13	6	1.87	312	0.006	0.26576
GO:0030048	actin filament-based movement	26	4	3.73	1370	0.52479	0.26578
GO:0060573	cell fate specification involved in pattern specification	7	5	1.01	203	0.00099	0.26579
GO:0042551	neuron maturation	49	11	7.04	650	0.08372	0.2658
GO:0045465	R8 cell differentiation	16	6	2.3	423	0.01912	0.26586
GO:1990138	neuron projection extension	48	10	6.89	766	0.14142	0.266
GO:0048103	somatic stem cell division	46	6	6.6	1743	0.66448	0.26611
GO:0045665	negative regulation of neuron differentiation	19	5	2.73	731	0.1254	0.2662
GO:0051208	sequestering of calcium ion	7	3	1.01	608	0.06598	0.26626
GO:0050878	regulation of body fluid levels	14	4	2.01	752	0.1297	0.26626
GO:0051963	regulation of synapse assembly	98	16	14.07	1138	0.32926	0.26627
GO:1901616	organic hydroxy compound catabolic process	15	4	2.15	824	0.15781	0.2663
GO:0043271	negative regulation of ion transport	12	3	1.72	964	0.24222	0.26643
GO:2001233	regulation of apoptotic signaling pathway	20	4	2.87	1076	0.32116	0.26647
GO:0007599	hemostasis	7	2	1.01	1011	0.2655	0.2665
GO:0050817	coagulation	7	2	1.01	1012	0.2655	0.2665
GO:0050982	detection of mechanical stimulus	7	2	1.01	1013	0.2655	0.2665
GO:0030522	intracellular receptor signaling pathway	21	4	3.02	1154	0.35596	0.2665
GO:0044839	cell cycle G2/M phase transition	37	6	5.31	1277	0.44283	0.26657
GO:0060359	response to ammonium ion	10	2	1.44	1243	0.43196	0.2666
GO:0022408	negative regulation of cell-cell adhesion	11	2	1.58	1314	0.4831	0.26663
GO:0046834	lipid phosphorylation	18	3	2.58	1329	0.4892	0.26663
GO:0051047	positive regulation of secretion	25	4	3.59	1341	0.49243	0.26664
GO:0071229	cellular response to acid chemical	12	2	1.72	1377	0.53128	0.26667
GO:0043279	response to alkaloid	19	3	2.73	1374	0.52718	0.26667
GO:0002793	positive regulation of peptide secretion	13	2	1.87	1504	0.57629	0.2667
GO:0051646	mitochondrion localization	23	3	3.3	1670	0.66172	0.2668
GO:0035210	prepupal development	17	2	2.44	1868	0.7242	0.26684
GO:0071417	cellular response to organonitrogen compound	53	7	7.61	1658	0.6543	0.26688
GO:0036294	cellular response to decreased oxygen levels	26	3	3.73	1905	0.74285	0.2669
GO:0072350	tricarboxylic acid metabolic process	34	4	4.88	1899	0.73998	0.26694
GO:0009913	epidermal cell differentiation	42	5	6.03	1902	0.74057	0.26698
GO:0010950	positive regulation of endopeptidase activity	22	2	3.16	2213	0.84549	0.267
GO:0002376	immune system process	373	52	53.56	1614	0.61671	0.26713
GO:0023014	signal transduction by protein phosphorylation	151	20	21.68	1762	0.68834	0.26714
GO:0002775	antimicrobial peptide production	41	4	5.89	2231	0.85965	0.26718
GO:0044782	cilium organization	45	4	6.46	2370	0.90416	0.26731
GO:0030865	cortical cytoskeleton organization	60	6	8.61	2304	0.87932	0.26735
GO:0006650	glycerophospholipid metabolic process	81	7	11.63	2576	0.957	0.26766
GO:0051052	regulation of DNA metabolic process	62	4	8.9	2725	0.98404	0.26789
GO:0031669	cellular response to nutrient levels	61	3	8.76	2838	0.99522	0.26809
GO:0051707	response to other organism	269	33	38.62	2237	0.86197	0.26811
GO:0022411	cellular component disassembly	109	9	15.65	2708	0.98161	0.26845
GO:0006091	generation of precursor metabolites and energy	151	15	21.68	2582	0.95943	0.26848
GO:0006403	RNA localization	166	11	23.83	2933	0.99946	0.26981
GO:0048609	multicellular organismal reproductive process	827	107	118.74	2368	0.90253	0.26986
GO:0010033	response to organic substance	394	77	56.57	246	0.00225	0.27326
GO:0015833	peptide transport	386	22	55.42	3055	1	0.275
GO:0050808	synapse organization	233	44	33.45	484	0.03149	0.27807
GO:0051241	negative regulation of multicellular organismal process	159	30	22.83	613	0.06731	0.28054
GO:0007613	memory	97	19	13.93	685	0.09476	0.28166
GO:0016331	morphogenesis of embryonic epithelium	108	19	15.51	894	0.20099	0.28248
GO:0045610	regulation of hemocyte differentiation	23	5	3.3	950	0.22692	0.28342
GO:0035075	response to ecdysone	40	7	5.74	1147	0.34871	0.28364
GO:0002385	mucosal immune response	13	3	1.87	1040	0.28371	0.28371
GO:0030308	negative regulation of cell growth	13	3	1.87	1041	0.28371	0.28371
GO:0045773	positive regulation of axon extension	13	3	1.87	1042	0.28371	0.28371
GO:0009166	nucleotide catabolic process	30	5	4.31	1272	0.43549	0.28394
GO:0019538	protein metabolic process	1877	200	269.5	3050	1	0.28858
GO:0040011	locomotion	508	118	72.94	35	2e-08	0.2993
GO:0007507	heart development	88	21	12.64	367	0.01146	0.30916
GO:0006811	ion transport	377	82	54.13	112	4.5e-05	0.31009
GO:0008582	regulation of synaptic growth at neuromuscular junction	91	15	13.07	1126	0.32294	0.31395
GO:0070050	neuron cellular homeostasis	26	5	3.73	1068	0.31445	0.31445
GO:0007391	dorsal closure	95	16	13.64	1052	0.28388	0.31652
GO:0007269	neurotransmitter secretion	80	17	11.49	583	0.05933	0.31825
GO:0048675	axon extension	46	9	6.6	904	0.20657	0.32033
GO:0007591	molting cycle, chitin-based cuticle	81	22	11.63	229	0.00183	0.3204
GO:1901570	fatty acid derivative biosynthetic process	21	8	3.02	318	0.0063	0.32066
GO:0030239	myofibril assembly	42	10	6.03	627	0.06942	0.3211
GO:0003014	renal system process	22	7	3.16	475	0.02954	0.32116
GO:0007280	pole cell migration	20	4	2.87	1077	0.32116	0.32116
GO:0042331	phototaxis	20	4	2.87	1078	0.32116	0.32116
GO:0043171	peptide catabolic process	20	4	2.87	1079	0.32116	0.32116
GO:0007204	positive regulation of cytosolic calcium ion concentration	13	5	1.87	467	0.02865	0.32147
GO:0043112	receptor metabolic process	13	3	1.87	1043	0.28371	0.32234
GO:0045570	regulation of imaginal disc growth	27	5	3.88	1146	0.34464	0.32235
GO:0001676	long-chain fatty acid metabolic process	8	2	1.15	1088	0.32247	0.32247
GO:0006071	glycerol metabolic process	8	2	1.15	1089	0.32247	0.32247
GO:0006525	arginine metabolic process	8	2	1.15	1090	0.32247	0.32247
GO:0019221	cytokine-mediated signaling pathway	8	2	1.15	1091	0.32247	0.32247
GO:0031629	synaptic vesicle fusion to presynaptic active zone membrane	8	2	1.15	1092	0.32247	0.32247
GO:0035204	negative regulation of lamellocyte differentiation	8	2	1.15	1093	0.32247	0.32247
GO:0042438	melanin biosynthetic process	8	2	1.15	1094	0.32247	0.32247
GO:0043697	cell dedifferentiation	8	2	1.15	1095	0.32247	0.32247
GO:0046673	negative regulation of compound eye retinal cell programmed cell death	8	2	1.15	1096	0.32247	0.32247
GO:0048682	sprouting of injured axon	8	2	1.15	1097	0.32247	0.32247
GO:0048738	cardiac muscle tissue development	8	2	1.15	1098	0.32247	0.32247
GO:0048800	antennal morphogenesis	8	2	1.15	1099	0.32247	0.32247
GO:0097150	neuronal stem cell population maintenance	8	2	1.15	1100	0.32247	0.32247
GO:0097254	renal tubular secretion	8	2	1.15	1101	0.32247	0.32247
GO:0098659	inorganic cation import across plasma membrane	8	2	1.15	1102	0.32247	0.32247
GO:1900371	regulation of purine nucleotide biosynthetic process	8	2	1.15	1103	0.32247	0.32247
GO:1902669	positive regulation of axon guidance	8	2	1.15	1104	0.32247	0.32247
GO:1904064	positive regulation of cation transmembrane transport	8	2	1.15	1105	0.32247	0.32247
GO:0000302	response to reactive oxygen species	22	4	3.16	1210	0.39073	0.32247
GO:0040001	establishment of mitotic spindle localization	24	3	3.45	1763	0.69066	0.32303
GO:0030833	regulation of actin filament polymerization	52	4	7.47	2547	0.9528	0.32435
GO:0016360	sensory organ precursor cell fate determination	14	3	2.01	1127	0.32571	0.32571
GO:0030713	ovarian follicle cell stalk formation	14	3	2.01	1128	0.32571	0.32571
GO:0051865	protein autoubiquitination	14	3	2.01	1129	0.32571	0.32571
GO:0007476	imaginal disc-derived wing morphogenesis	220	44	31.59	375	0.0124	0.33257
GO:0030148	sphingolipid biosynthetic process	33	6	4.74	1139	0.33399	0.33399
GO:0016485	protein processing	59	12	8.47	756	0.13101	0.33521
GO:0009653	anatomical structure morphogenesis	1229	238	176.46	43	6.7e-08	0.34956
GO:0007304	chorion-containing eggshell formation	105	19	15.08	852	0.16761	0.35389
GO:0007552	metamorphosis	374	75	53.7	210	0.00124	0.35476
GO:0051607	defense response to virus	38	7	5.46	1063	0.29958	0.35557
GO:0051491	positive regulation of filopodium assembly	21	4	3.02	1155	0.35596	0.35596
GO:0001708	cell fate specification	68	26	9.76	62	9.2e-07	0.35837
GO:0001736	establishment of planar polarity	88	27	12.64	123	6.4e-05	0.35948
GO:0007267	cell-cell signaling	391	79	56.14	191	0.00073	0.36702
GO:0048598	embryonic morphogenesis	192	42	27.57	257	0.00285	0.3676
GO:0006727	ommochrome biosynthetic process	15	3	2.15	1165	0.36769	0.36769
GO:0006730	one-carbon metabolic process	15	3	2.15	1166	0.36769	0.36769
GO:0051259	protein complex oligomerization	36	6	5.17	1230	0.41571	0.3677
GO:0015893	drug transport	24	4	3.45	1292	0.45918	0.36786
GO:0009954	proximal/distal pattern formation	18	13	2.58	41	4.4e-08	0.36892
GO:0019730	antimicrobial humoral response	73	9	10.48	1897	0.73953	0.3691
GO:0048619	embryonic hindgut morphogenesis	40	14	5.74	200	0.00088	0.36957
GO:0048638	regulation of developmental growth	188	35	26.99	585	0.06043	0.3696
GO:0035223	leg disc pattern formation	14	10	2.01	69	2.1e-06	0.36966
GO:0009790	embryo development	445	81	63.89	373	0.0119	0.36987
GO:0051093	negative regulation of developmental process	168	31	24.12	646	0.08105	0.36995
GO:0051270	regulation of cellular component movement	51	14	7.32	363	0.01063	0.37005
GO:0040012	regulation of locomotion	52	14	7.47	377	0.01268	0.37009
GO:0048568	embryonic organ development	46	13	6.6	361	0.01056	0.37013
GO:0001763	morphogenesis of a branching structure	50	13	7.18	433	0.02132	0.37031
GO:0060446	branching involved in open tracheal system development	47	12	6.75	477	0.03022	0.37048
GO:0001895	retina homeostasis	17	7	2.44	324	0.00643	0.37069
GO:0055002	striated muscle cell development	54	12	7.75	634	0.07773	0.37078
GO:0009407	toxin catabolic process	8	5	1.15	247	0.00232	0.37091
GO:0007166	cell surface receptor signaling pathway	565	99	81.12	402	0.01665	0.37101
GO:0045596	negative regulation of cell differentiation	95	17	13.64	887	0.19688	0.37105
GO:0035161	imaginal disc lineage restriction	8	4	1.15	417	0.01828	0.37121
GO:0097190	apoptotic signaling pathway	40	8	5.74	909	0.20749	0.37139
GO:0071407	cellular response to organic cyclic compound	56	10	8.04	1032	0.27797	0.37148
GO:0002218	activation of innate immune response	16	4	2.3	877	0.18792	0.37156
GO:0099504	synaptic vesicle cycle	100	16	14.36	1160	0.36044	0.37157
GO:0002118	aggressive behavior	12	3	1.72	965	0.24222	0.37169
GO:0050962	detection of light stimulus involved in sensory perception	12	3	1.72	966	0.24222	0.37169
GO:0015918	sterol transport	20	4	2.87	1080	0.32116	0.37173
GO:0006584	catecholamine metabolic process	14	3	2.01	1130	0.32571	0.37177
GO:0007162	negative regulation of cell adhesion	14	3	2.01	1131	0.32571	0.37177
GO:0048639	positive regulation of developmental growth	70	11	10.05	1232	0.4235	0.37179
GO:0007212	dopamine receptor signaling pathway	8	2	1.15	1106	0.32247	0.37182
GO:0046349	amino sugar biosynthetic process	8	2	1.15	1107	0.32247	0.37182
GO:0046717	acid secretion	8	2	1.15	1108	0.32247	0.37182
GO:0048009	insulin-like growth factor receptor signaling pathway	8	2	1.15	1109	0.32247	0.37182
GO:0050907	detection of chemical stimulus involved in sensory perception	8	2	1.15	1110	0.32247	0.37182
GO:0043067	regulation of programmed cell death	204	30	29.29	1306	0.47403	0.37186
GO:1900426	positive regulation of defense response to bacterium	18	3	2.58	1330	0.4892	0.37195
GO:0046058	cAMP metabolic process	12	2	1.72	1378	0.53128	0.37199
GO:0030518	intracellular steroid hormone receptor signaling pathway	14	2	2.01	1615	0.61805	0.37208
GO:0002807	positive regulation of antimicrobial peptide biosynthetic process	21	3	3.02	1534	0.59813	0.37208
GO:0035069	larval midgut histolysis	26	3	3.73	1906	0.74285	0.37229
GO:0016051	carbohydrate biosynthetic process	47	5	6.75	2139	0.82488	0.3726
GO:0048278	vesicle docking	28	2	4.02	2435	0.92614	0.37268
GO:0007091	metaphase/anaphase transition of mitotic cell cycle	30	2	4.31	2516	0.94269	0.37277
GO:0045886	negative regulation of synaptic growth at neuromuscular junction	41	7	5.89	1174	0.37361	0.37361
GO:0001894	tissue homeostasis	44	14	6.32	250	0.00249	0.37487
GO:0019637	organophosphate metabolic process	339	37	48.67	2692	0.97641	0.37576
GO:0035172	hemocyte proliferation	43	12	6.17	396	0.01524	0.37577
GO:0009611	response to wounding	104	19	14.93	819	0.15719	0.3766
GO:0007619	courtship behavior	50	11	7.18	668	0.0941	0.37673
GO:0009612	response to mechanical stimulus	24	7	3.45	554	0.04644	0.37686
GO:0048067	cuticle pigmentation	40	9	5.74	712	0.10998	0.377
GO:0042446	hormone biosynthetic process	29	7	4.16	715	0.11149	0.37721
GO:0007612	learning	57	11	8.18	871	0.18677	0.37721
GO:0046667	compound eye retinal cell programmed cell death	25	6	3.59	760	0.13839	0.37741
GO:0008016	regulation of heart contraction	20	5	2.87	774	0.14852	0.37755
GO:0000187	activation of MAPK activity	9	2	1.29	1180	0.37823	0.37823
GO:0002121	inter-male aggressive behavior	9	2	1.29	1181	0.37823	0.37823
GO:0006020	inositol metabolic process	9	2	1.29	1182	0.37823	0.37823
GO:0006072	glycerol-3-phosphate metabolic process	9	2	1.29	1183	0.37823	0.37823
GO:0006937	regulation of muscle contraction	9	2	1.29	1184	0.37823	0.37823
GO:0008062	eclosion rhythm	9	2	1.29	1185	0.37823	0.37823
GO:0008090	retrograde axonal transport	9	2	1.29	1186	0.37823	0.37823
GO:0018242	protein O-linked glycosylation via serine	9	2	1.29	1187	0.37823	0.37823
GO:0043153	entrainment of circadian clock by photoperiod	9	2	1.29	1188	0.37823	0.37823
GO:0043704	photoreceptor cell fate specification	9	2	1.29	1189	0.37823	0.37823
GO:0045198	establishment of epithelial cell apical/basal polarity	9	2	1.29	1190	0.37823	0.37823
GO:0045314	regulation of compound eye photoreceptor development	9	2	1.29	1191	0.37823	0.37823
GO:0045571	negative regulation of imaginal disc growth	9	2	1.29	1192	0.37823	0.37823
GO:0050908	detection of light stimulus involved in visual perception	9	2	1.29	1193	0.37823	0.37823
GO:0060361	flight	9	2	1.29	1194	0.37823	0.37823
GO:0097237	cellular response to toxic substance	9	2	1.29	1195	0.37823	0.37823
GO:1902358	sulfate transmembrane transport	9	2	1.29	1196	0.37823	0.37823
GO:2001257	regulation of cation channel activity	9	2	1.29	1197	0.37823	0.37823
GO:0072347	response to anesthetic	17	3	2.44	1282	0.44978	0.3783
GO:0019731	antibacterial humoral response	27	4	3.88	1494	0.55612	0.37851
GO:0050768	negative regulation of neurogenesis	58	8	8.33	1610	0.60633	0.37873
GO:0048149	behavioral response to ethanol	48	8	6.89	1206	0.38345	0.38345
GO:0048523	negative regulation of cellular process	967	126	138.84	2385	0.90666	0.38569
GO:0043065	positive regulation of apoptotic process	50	7	7.18	1530	0.59057	0.39148
GO:0050770	regulation of axonogenesis	41	8	5.89	952	0.22774	0.40827
GO:0009953	dorsal/ventral pattern formation	129	20	18.52	1213	0.3917	0.40867
GO:0045807	positive regulation of endocytosis	29	5	4.16	1220	0.40534	0.40909
GO:0090175	regulation of establishment of planar polarity	16	3	2.3	1226	0.40917	0.40917
GO:0051453	regulation of intracellular pH	32	5	4.59	1348	0.49458	0.40936
GO:0009968	negative regulation of signal transduction	260	37	37.33	1492	0.55175	0.41683
GO:0048646	anatomical structure formation involved in morphogenesis	440	78	63.18	459	0.02447	0.42418
GO:0048167	regulation of synaptic plasticity	23	4	3.3	1234	0.42522	0.42522
GO:0048871	multicellular organismal homeostasis	54	16	7.75	258	0.00287	0.428
GO:0006874	cellular calcium ion homeostasis	38	11	5.46	394	0.01499	0.4294
GO:0010035	response to inorganic substance	45	12	6.46	435	0.02179	0.4294
GO:0006821	chloride transport	33	10	4.74	393	0.01439	0.42955
GO:0048520	positive regulation of behavior	23	7	3.3	504	0.03737	0.43035
GO:0003015	heart process	35	8	5.03	720	0.11888	0.43072
GO:1901701	cellular response to oxygen-containing compound	99	17	14.21	975	0.24877	0.43081
GO:0030162	regulation of proteolysis	105	8	15.08	2761	0.98864	0.43116
GO:0002230	positive regulation of defense response to virus by host	10	2	1.44	1244	0.43196	0.43196
GO:0006721	terpenoid metabolic process	10	2	1.44	1245	0.43196	0.43196
GO:0007026	negative regulation of microtubule depolymerization	10	2	1.44	1246	0.43196	0.43196
GO:0007096	regulation of exit from mitosis	10	2	1.44	1247	0.43196	0.43196
GO:0007615	anesthesia-resistant memory	10	2	1.44	1248	0.43196	0.43196
GO:0016201	synaptic target inhibition	10	2	1.44	1249	0.43196	0.43196
GO:0018243	protein O-linked glycosylation via threonine	10	2	1.44	1250	0.43196	0.43196
GO:0019896	axonal transport of mitochondrion	10	2	1.44	1251	0.43196	0.43196
GO:0030381	chorion-containing eggshell pattern formation	10	2	1.44	1252	0.43196	0.43196
GO:0040034	regulation of development, heterochronic	10	2	1.44	1253	0.43196	0.43196
GO:0043113	receptor clustering	10	2	1.44	1254	0.43196	0.43196
GO:0045742	positive regulation of epidermal growth factor receptor signaling pathway	10	2	1.44	1255	0.43196	0.43196
GO:0048747	muscle fiber development	10	2	1.44	1256	0.43196	0.43196
GO:0090254	cell elongation involved in imaginal disc-derived wing morphogenesis	10	2	1.44	1257	0.43196	0.43196
GO:2000737	negative regulation of stem cell differentiation	10	2	1.44	1258	0.43196	0.43196
GO:2001234	negative regulation of apoptotic signaling pathway	10	2	1.44	1259	0.43196	0.43196
GO:0048542	lymph gland development	46	7	6.6	1359	0.49745	0.43205
GO:0007528	neuromuscular junction development	150	26	21.54	858	0.17448	0.43218
GO:0030031	cell projection assembly	101	13	14.5	1795	0.70848	0.43304
GO:0045995	regulation of embryonic development	74	8	10.63	2227	0.85251	0.43361
GO:0042325	regulation of phosphorylation	231	28	33.17	2236	0.86108	0.43499
GO:0030718	germ-line stem cell population maintenance	65	9	9.33	1539	0.60126	0.43638
GO:0008285	negative regulation of cell proliferation	79	12	11.34	1300	0.46479	0.44286
GO:0032507	maintenance of protein location in cell	29	6	4.16	953	0.22937	0.44894
GO:0030301	cholesterol transport	17	3	2.44	1283	0.44978	0.44978
GO:0033627	cell adhesion mediated by integrin	17	3	2.44	1284	0.44978	0.44978
GO:0045176	apical protein localization	17	3	2.44	1285	0.44978	0.44978
GO:0007088	regulation of mitotic nuclear division	61	7	8.76	2065	0.79236	0.45131
GO:0007298	border follicle cell migration	106	16	15.22	1289	0.45606	0.45606
GO:0007167	enzyme linked receptor protein signaling pathway	217	46	31.16	264	0.00354	0.45699
GO:0009628	response to abiotic stimulus	350	64	50.25	434	0.02165	0.45729
GO:0036335	intestinal stem cell homeostasis	24	4	3.45	1293	0.45918	0.45918
GO:0010557	positive regulation of macromolecule biosynthetic process	356	59	51.11	735	0.12713	0.45942
GO:0010927	cellular component assembly involved in morphogenesis	125	25	17.95	558	0.05043	0.4598
GO:0014070	response to organic cyclic compound	103	21	14.79	578	0.05783	0.4601
GO:0035051	cardiocyte differentiation	21	9	3.02	220	0.00145	0.4602
GO:0060581	cell fate commitment involved in pattern specification	25	9	3.59	308	0.00588	0.4604
GO:0010632	regulation of epithelial cell migration	15	6	2.15	390	0.01357	0.46094
GO:0045597	positive regulation of cell differentiation	86	15	12.35	974	0.24645	0.46135
GO:0035154	terminal cell fate specification, open tracheal system	10	4	1.44	545	0.04328	0.46138
GO:0030497	fatty acid elongation	17	5	2.44	658	0.08475	0.46138
GO:0046165	alcohol biosynthetic process	32	7	4.59	850	0.1657	0.46144
GO:0060795	cell fate commitment involved in formation of primary germ layer	10	3	1.44	844	0.1633	0.46173
GO:0051924	regulation of calcium ion transport	17	4	2.44	944	0.21967	0.46173
GO:1902667	regulation of axon guidance	17	4	2.44	945	0.21967	0.46173
GO:0120034	positive regulation of plasma membrane bounded cell projection assembly	25	5	3.59	1053	0.28462	0.46178
GO:0034097	response to cytokine	12	3	1.72	967	0.24222	0.46183
GO:0035171	lamellocyte differentiation	12	3	1.72	968	0.24222	0.46183
GO:0060828	regulation of canonical Wnt signaling pathway	55	9	7.9	1212	0.39149	0.46189
GO:0051100	negative regulation of binding	10	2	1.44	1260	0.43196	0.46207
GO:1905954	positive regulation of lipid localization	11	2	1.58	1315	0.4831	0.46212
GO:0071901	negative regulation of protein serine/threonine kinase activity	12	2	1.72	1379	0.53128	0.46217
GO:0036465	synaptic vesicle recycling	47	7	6.75	1365	0.52144	0.46218
GO:0046622	positive regulation of organ growth	14	2	2.01	1616	0.61805	0.46227
GO:0007530	sex determination	24	3	3.45	1764	0.69066	0.46242
GO:0072384	organelle transport along microtubule	24	3	3.45	1765	0.69066	0.46242
GO:0051603	proteolysis involved in cellular protein catabolic process	231	15	33.17	2984	0.99995	0.46245
GO:0002684	positive regulation of immune system process	74	10	10.63	1646	0.63314	0.46249
GO:0030705	cytoskeleton-dependent intracellular transport	56	7	8.04	1847	0.71171	0.46263
GO:0032886	regulation of microtubule-based process	44	5	6.32	1996	0.77738	0.46272
GO:0031325	positive regulation of cellular metabolic process	609	85	87.44	1648	0.63474	0.4632
GO:0010604	positive regulation of macromolecule metabolic process	595	82	85.43	1756	0.68084	0.46357
GO:0043069	negative regulation of programmed cell death	97	10	13.93	2384	0.90645	0.46364
GO:0046331	lateral inhibition	31	5	4.45	1301	0.46528	0.46528
GO:0048583	regulation of response to stimulus	818	101	117.45	2609	0.96539	0.46864
GO:0007444	imaginal disc development	457	93	65.62	141	0.00019	0.46956
GO:2000112	regulation of cellular macromolecule biosynthetic process	1021	128	146.6	2633	0.96847	0.4697
GO:0008360	regulation of cell shape	61	8	8.76	1744	0.66494	0.47096
GO:0007517	muscle organ development	76	27	10.91	76	3e-06	0.47459
GO:0030154	cell differentiation	1361	243	195.41	110	3.9e-05	0.47754
GO:0045475	locomotor rhythm	59	9	8.47	1310	0.47811	0.47811
GO:0009880	embryonic pattern specification	185	34	26.56	628	0.07362	0.47924
GO:0016055	Wnt signaling pathway	97	16	13.93	1066	0.31392	0.4822
GO:0007446	imaginal disc growth	38	7	5.46	1064	0.29958	0.48249
GO:0006964	positive regulation of biosynthetic process of antibacterial peptides active against Gram-negative b...	11	2	1.58	1316	0.4831	0.4831
GO:0007295	growth of a germarium-derived egg chamber	11	2	1.58	1317	0.4831	0.4831
GO:0010043	response to zinc ion	11	2	1.58	1318	0.4831	0.4831
GO:0015701	bicarbonate transport	11	2	1.58	1319	0.4831	0.4831
GO:0035332	positive regulation of hippo signaling	11	2	1.58	1320	0.4831	0.4831
GO:0042417	dopamine metabolic process	11	2	1.58	1321	0.4831	0.4831
GO:0046503	glycerolipid catabolic process	11	2	1.58	1322	0.4831	0.4831
GO:0007031	peroxisome organization	18	3	2.58	1331	0.4892	0.4831
GO:0001578	microtubule bundle formation	26	4	3.73	1371	0.52479	0.48318
GO:0010389	regulation of G2/M transition of mitotic cell cycle	28	3	4.02	2015	0.78777	0.48387
GO:0006955	immune response	246	29	35.32	2348	0.89898	0.48683
GO:0008354	germ cell migration	38	7	5.46	1065	0.29958	0.48843
GO:0006491	N-glycan processing	18	3	2.58	1332	0.4892	0.4892
GO:0034333	adherens junction assembly	18	3	2.58	1333	0.4892	0.4892
GO:0046529	imaginal disc fusion, thorax closure	18	3	2.58	1334	0.4892	0.4892
GO:0050830	defense response to Gram-positive bacterium	25	4	3.59	1342	0.49243	0.49243
GO:0090090	negative regulation of canonical Wnt signaling pathway	25	4	3.59	1343	0.49243	0.49243
GO:0003333	amino acid transmembrane transport	32	5	4.59	1349	0.49458	0.49458
GO:0032502	developmental process	2185	392	313.73	33	1.2e-08	0.49697
GO:0050804	modulation of chemical synaptic transmission	94	28	13.5	127	8.4e-05	0.51724
GO:0009058	biosynthetic process	2009	208	288.45	3073	1	0.52158
GO:0050832	defense response to fungus	39	5	5.6	1753	0.67732	0.52549
GO:0007430	terminal branching, open tracheal system	19	3	2.73	1375	0.52718	0.52718
GO:0051050	positive regulation of transport	88	15	12.64	1031	0.27623	0.53011
GO:0006623	protein targeting to vacuole	12	2	1.72	1380	0.53128	0.53128
GO:0006835	dicarboxylic acid transport	12	2	1.72	1381	0.53128	0.53128
GO:0007035	vacuolar acidification	12	2	1.72	1382	0.53128	0.53128
GO:0007193	adenylate cyclase-inhibiting G-protein coupled receptor signaling pathway	12	2	1.72	1383	0.53128	0.53128
GO:0009047	dosage compensation by hyperactivation of X chromosome	12	2	1.72	1384	0.53128	0.53128
GO:0030536	larval feeding behavior	12	2	1.72	1385	0.53128	0.53128
GO:0035072	ecdysone-mediated induction of salivary gland cell autophagic cell death	12	2	1.72	1386	0.53128	0.53128
GO:0043467	regulation of generation of precursor metabolites and energy	12	2	1.72	1387	0.53128	0.53128
GO:0072553	terminal button organization	34	5	4.88	1490	0.5512	0.53136
GO:1903532	positive regulation of secretion by cell	23	3	3.3	1671	0.66172	0.5316
GO:0030010	establishment of cell polarity	48	6	6.89	1793	0.70547	0.53192
GO:0019216	regulation of lipid metabolic process	36	4	5.17	2010	0.78037	0.53208
GO:0032880	regulation of protein localization	77	8	11.06	2306	0.88097	0.53313
GO:0060322	head development	108	32	15.51	105	3e-05	0.5333
GO:0042335	cuticle development	136	35	19.53	163	0.0003	0.53367
GO:0009314	response to radiation	168	35	24.12	386	0.01322	0.53539
GO:0007611	learning or memory	139	27	19.96	581	0.05921	0.53685
GO:0071214	cellular response to abiotic stimulus	63	15	9.05	480	0.03034	0.53728
GO:0022603	regulation of anatomical structure morphogenesis	198	34	28.43	779	0.14896	0.53739
GO:0009792	embryo development ending in birth or egg hatching	157	27	22.54	861	0.17991	0.53782
GO:0006665	sphingolipid metabolic process	54	11	7.75	768	0.14292	0.53829
GO:0030149	sphingolipid catabolic process	16	5	2.3	618	0.06748	0.5385
GO:0060047	heart contraction	25	6	3.59	761	0.13839	0.53861
GO:0051051	negative regulation of transport	32	7	4.59	851	0.1657	0.53861
GO:0045185	maintenance of protein location	34	7	4.88	908	0.2072	0.53871
GO:0090097	regulation of decapentaplegic signaling pathway	10	3	1.44	845	0.1633	0.53892
GO:0035330	regulation of hippo signaling	23	4	3.3	1235	0.42522	0.53924
GO:0046605	regulation of centrosome cycle	10	2	1.44	1261	0.43196	0.53929
GO:0035070	salivary gland histolysis	31	5	4.45	1302	0.46528	0.53929
GO:0000467	exonucleolytic trimming to generate mature 3'-end of 5.8S rRNA from tricistronic rRNA transcript (SS...	5	1	0.72	1401	0.53939	0.53939
GO:0001678	cellular glucose homeostasis	5	1	0.72	1402	0.53939	0.53939
GO:0001706	endoderm formation	5	1	0.72	1403	0.53939	0.53939
GO:0006031	chitin biosynthetic process	5	1	0.72	1404	0.53939	0.53939
GO:0006034	cuticle chitin metabolic process	5	1	0.72	1405	0.53939	0.53939
GO:0006537	glutamate biosynthetic process	5	1	0.72	1406	0.53939	0.53939
GO:0006684	sphingomyelin metabolic process	5	1	0.72	1407	0.53939	0.53939
GO:0006690	icosanoid metabolic process	5	1	0.72	1408	0.53939	0.53939
GO:0006939	smooth muscle contraction	5	1	0.72	1409	0.53939	0.53939
GO:0007191	adenylate cyclase-activating dopamine receptor signaling pathway	5	1	0.72	1410	0.53939	0.53939
GO:0007249	I-kappaB kinase/NF-kappaB signaling	5	1	0.72	1411	0.53939	0.53939
GO:0007415	defasciculation of motor neuron axon	5	1	0.72	1412	0.53939	0.53939
GO:0007487	analia development	5	1	0.72	1413	0.53939	0.53939
GO:0007553	regulation of ecdysteroid metabolic process	5	1	0.72	1414	0.53939	0.53939
GO:0007589	body fluid secretion	5	1	0.72	1415	0.53939	0.53939
GO:0008335	female germline ring canal stabilization	5	1	0.72	1416	0.53939	0.53939
GO:0010635	regulation of mitochondrial fusion	5	1	0.72	1417	0.53939	0.53939
GO:0019099	female germ-line sex determination	5	1	0.72	1418	0.53939	0.53939
GO:0021954	central nervous system neuron development	5	1	0.72	1419	0.53939	0.53939
GO:0022600	digestive system process	5	1	0.72	1420	0.53939	0.53939
GO:0030104	water homeostasis	5	1	0.72	1421	0.53939	0.53939
GO:0030335	positive regulation of cell migration	5	1	0.72	1422	0.53939	0.53939
GO:0030423	targeting of mRNA for destruction involved in RNA interference	5	1	0.72	1423	0.53939	0.53939
GO:0030513	positive regulation of BMP signaling pathway	5	1	0.72	1424	0.53939	0.53939
GO:0031623	receptor internalization	5	1	0.72	1425	0.53939	0.53939
GO:0032222	regulation of synaptic transmission, cholinergic	5	1	0.72	1426	0.53939	0.53939
GO:0034227	tRNA thio-modification	5	1	0.72	1427	0.53939	0.53939
GO:0034284	response to monosaccharide	5	1	0.72	1428	0.53939	0.53939
GO:0034312	diol biosynthetic process	5	1	0.72	1429	0.53939	0.53939
GO:0034501	protein localization to kinetochore	5	1	0.72	1430	0.53939	0.53939
GO:0035626	juvenile hormone mediated signaling pathway	5	1	0.72	1431	0.53939	0.53939
GO:0035721	intraciliary retrograde transport	5	1	0.72	1432	0.53939	0.53939
GO:0042381	hemolymph coagulation	5	1	0.72	1433	0.53939	0.53939
GO:0042423	catecholamine biosynthetic process	5	1	0.72	1434	0.53939	0.53939
GO:0042542	response to hydrogen peroxide	5	1	0.72	1435	0.53939	0.53939
GO:0043433	negative regulation of DNA binding transcription factor activity	5	1	0.72	1436	0.53939	0.53939
GO:0043567	regulation of insulin-like growth factor receptor signaling pathway	5	1	0.72	1437	0.53939	0.53939
GO:0044771	meiotic cell cycle phase transition	5	1	0.72	1438	0.53939	0.53939
GO:0045069	regulation of viral genome replication	5	1	0.72	1439	0.53939	0.53939
GO:0045743	positive regulation of fibroblast growth factor receptor signaling pathway	5	1	0.72	1440	0.53939	0.53939
GO:0046602	regulation of mitotic centrosome separation	5	1	0.72	1441	0.53939	0.53939
GO:0048525	negative regulation of viral process	5	1	0.72	1442	0.53939	0.53939
GO:0048644	muscle organ morphogenesis	5	1	0.72	1443	0.53939	0.53939
GO:0048730	epidermis morphogenesis	5	1	0.72	1444	0.53939	0.53939
GO:0050482	arachidonic acid secretion	5	1	0.72	1445	0.53939	0.53939
GO:0050848	regulation of calcium-mediated signaling	5	1	0.72	1446	0.53939	0.53939
GO:0050911	detection of chemical stimulus involved in sensory perception of smell	5	1	0.72	1447	0.53939	0.53939
GO:0050916	sensory perception of sweet taste	5	1	0.72	1448	0.53939	0.53939
GO:0050974	detection of mechanical stimulus involved in sensory perception	5	1	0.72	1449	0.53939	0.53939
GO:0051569	regulation of histone H3-K4 methylation	5	1	0.72	1450	0.53939	0.53939
GO:0051928	positive regulation of calcium ion transport	5	1	0.72	1451	0.53939	0.53939
GO:0060213	positive regulation of nuclear-transcribed mRNA poly(A) tail shortening	5	1	0.72	1452	0.53939	0.53939
GO:0060439	trachea morphogenesis	5	1	0.72	1453	0.53939	0.53939
GO:0060914	heart formation	5	1	0.72	1454	0.53939	0.53939
GO:0061668	mitochondrial ribosome assembly	5	1	0.72	1455	0.53939	0.53939
GO:0070059	intrinsic apoptotic signaling pathway in response to endoplasmic reticulum stress	5	1	0.72	1456	0.53939	0.53939
GO:0070127	tRNA aminoacylation for mitochondrial protein translation	5	1	0.72	1457	0.53939	0.53939
GO:0070920	regulation of production of small RNA involved in gene silencing by RNA	5	1	0.72	1458	0.53939	0.53939
GO:0071046	nuclear polyadenylation-dependent ncRNA catabolic process	5	1	0.72	1459	0.53939	0.53939
GO:0071689	muscle thin filament assembly	5	1	0.72	1460	0.53939	0.53939
GO:0090382	phagosome maturation	5	1	0.72	1461	0.53939	0.53939
GO:0097374	sensory neuron axon guidance	5	1	0.72	1462	0.53939	0.53939
GO:0097384	cellular lipid biosynthetic process	5	1	0.72	1463	0.53939	0.53939
GO:0098700	neurotransmitter loading into synaptic vesicle	5	1	0.72	1464	0.53939	0.53939
GO:1900078	positive regulation of cellular response to insulin stimulus	5	1	0.72	1465	0.53939	0.53939
GO:1900117	regulation of execution phase of apoptosis	5	1	0.72	1466	0.53939	0.53939
GO:1900407	regulation of cellular response to oxidative stress	5	1	0.72	1467	0.53939	0.53939
GO:2000677	regulation of transcription regulatory region DNA binding	5	1	0.72	1468	0.53939	0.53939
GO:2001022	positive regulation of response to DNA damage stimulus	5	1	0.72	1469	0.53939	0.53939
GO:1990709	presynaptic active zone organization	13	2	1.87	1505	0.57629	0.53945
GO:0032869	cellular response to insulin stimulus	39	5	5.6	1754	0.67732	0.53972
GO:0018108	peptidyl-tyrosine phosphorylation	29	3	4.16	2084	0.80768	0.53993
GO:0006898	receptor-mediated endocytosis	33	3	4.74	2285	0.87219	0.54014
GO:0035195	gene silencing by miRNA	30	2	4.31	2517	0.94269	0.54035
GO:1901565	organonitrogen compound catabolic process	388	40	55.71	2821	0.99381	0.54053
GO:0017145	stem cell division	84	9	12.06	2282	0.87007	0.54064
GO:0000226	microtubule cytoskeleton organization	263	19	37.76	2968	0.99991	0.54065
GO:1902533	positive regulation of intracellular signal transduction	160	18	22.97	2346	0.89709	0.54137
GO:0019439	aromatic compound catabolic process	156	13	22.4	2808	0.99241	0.54303
GO:0031338	regulation of vesicle fusion	27	4	3.88	1495	0.55612	0.55612
GO:0043252	sodium-independent organic anion transport	27	4	3.88	1496	0.55612	0.55612
GO:0006807	nitrogen compound metabolic process	3667	398	526.51	3097	1	0.55787
GO:0044085	cellular component biogenesis	1107	110	158.94	3022	1	0.56039
GO:0044237	cellular metabolic process	3879	411	556.95	3098	1	0.56186
GO:0007390	germ-band shortening	20	3	2.87	1500	0.56353	0.56353
GO:0007314	oocyte anterior/posterior axis specification	81	7	11.63	2577	0.957	0.56686
GO:0042060	wound healing	77	12	11.06	1239	0.42763	0.567
GO:1901700	response to oxygen-containing compound	219	38	31.44	721	0.11949	0.5726
GO:0032147	activation of protein kinase activity	29	5	4.16	1221	0.40534	0.5759
GO:0097164	ammonium ion metabolic process	29	5	4.16	1222	0.40534	0.5759
GO:0036098	male germ-line stem cell population maintenance	13	2	1.87	1506	0.57629	0.57629
GO:0046627	negative regulation of insulin receptor signaling pathway	13	2	1.87	1507	0.57629	0.57629
GO:0008286	insulin receptor signaling pathway	34	4	4.88	1900	0.73998	0.57686
GO:0010004	gastrulation involving germ band extension	29	3	4.16	2085	0.80768	0.57701
GO:0048488	synaptic vesicle endocytosis	42	6	6.03	1502	0.57252	0.57834
GO:0010948	negative regulation of cell cycle process	60	4	8.61	2703	0.98006	0.57895
GO:1901361	organic cyclic compound catabolic process	164	14	23.55	2796	0.99176	0.58179
GO:0090263	positive regulation of canonical Wnt signaling pathway	28	4	4.02	1525	0.58631	0.58631
GO:0031175	neuron projection development	388	100	55.71	16	8.3e-10	0.5876
GO:0002009	morphogenesis of an epithelium	481	104	69.06	80	5.4e-06	0.59127
GO:0044249	cellular biosynthetic process	1954	197	280.56	3081	1	0.59192
GO:0048569	post-embryonic animal organ development	369	74	52.98	214	0.00133	0.59718
GO:0040018	positive regulation of multicellular organism growth	21	3	3.02	1535	0.59813	0.59813
GO:0051260	protein homooligomerization	21	3	3.02	1536	0.59813	0.59813
GO:0007472	wing disc morphogenesis	226	45	32.45	376	0.01247	0.6007
GO:0007616	long-term memory	65	9	9.33	1540	0.60126	0.60126
GO:0034754	cellular hormone metabolic process	34	10	4.88	408	0.01784	0.60368
GO:0023051	regulation of signaling	730	109	104.81	1143	0.33768	0.60388
GO:0030155	regulation of cell adhesion	40	10	5.74	560	0.05201	0.604
GO:0006066	alcohol metabolic process	61	13	8.76	665	0.0896	0.60401
GO:0032870	cellular response to hormone stimulus	84	16	12.06	767	0.14158	0.60412
GO:0045785	positive regulation of cell adhesion	16	6	2.3	424	0.01912	0.60422
GO:0051235	maintenance of location	94	17	13.5	869	0.18479	0.60428
GO:0044283	small molecule biosynthetic process	194	31	27.85	1056	0.286	0.60441
GO:0045746	negative regulation of Notch signaling pathway	36	5	5.17	1541	0.60456	0.60456
GO:0042675	compound eye cone cell differentiation	16	4	2.3	878	0.18792	0.60498
GO:0007584	response to nutrient	11	3	1.58	899	0.20185	0.60509
GO:0007620	copulation	11	3	1.58	900	0.20185	0.60509
GO:0045892	negative regulation of transcription, DNA-templated	277	46	39.77	830	0.15838	0.60526
GO:0017158	regulation of calcium ion-dependent exocytosis	12	2	1.72	1388	0.53128	0.60552
GO:0048846	axon extension involved in axon guidance	12	2	1.72	1389	0.53128	0.60552
GO:0000729	DNA double-strand break processing	6	1	0.86	1546	0.60557	0.60557
GO:0006121	mitochondrial electron transport, succinate to ubiquinone	6	1	0.86	1547	0.60557	0.60557
GO:0006264	mitochondrial DNA replication	6	1	0.86	1548	0.60557	0.60557
GO:0006356	regulation of transcription by RNA polymerase I	6	1	0.86	1549	0.60557	0.60557
GO:0006560	proline metabolic process	6	1	0.86	1550	0.60557	0.60557
GO:0006878	cellular copper ion homeostasis	6	1	0.86	1551	0.60557	0.60557
GO:0006884	cell volume homeostasis	6	1	0.86	1552	0.60557	0.60557
GO:0007348	regulation of syncytial blastoderm mitotic cell cycle	6	1	0.86	1553	0.60557	0.60557
GO:0007477	notum development	6	1	0.86	1554	0.60557	0.60557
GO:0007630	jump response	6	1	0.86	1555	0.60557	0.60557
GO:0009083	branched-chain amino acid catabolic process	6	1	0.86	1556	0.60557	0.60557
GO:0009226	nucleotide-sugar biosynthetic process	6	1	0.86	1557	0.60557	0.60557
GO:0009303	rRNA transcription	6	1	0.86	1558	0.60557	0.60557
GO:0014866	skeletal myofibril assembly	6	1	0.86	1559	0.60557	0.60557
GO:0016078	tRNA catabolic process	6	1	0.86	1560	0.60557	0.60557
GO:0016540	protein autoprocessing	6	1	0.86	1561	0.60557	0.60557
GO:0016558	protein import into peroxisome matrix	6	1	0.86	1562	0.60557	0.60557
GO:0019101	female somatic sex determination	6	1	0.86	1563	0.60557	0.60557
GO:0030382	sperm mitochondrion organization	6	1	0.86	1564	0.60557	0.60557
GO:0030728	ovulation	6	1	0.86	1565	0.60557	0.60557
GO:0030950	establishment or maintenance of actin cytoskeleton polarity	6	1	0.86	1566	0.60557	0.60557
GO:0032922	circadian regulation of gene expression	6	1	0.86	1567	0.60557	0.60557
GO:0032924	activin receptor signaling pathway	6	1	0.86	1568	0.60557	0.60557
GO:0042744	hydrogen peroxide catabolic process	6	1	0.86	1569	0.60557	0.60557
GO:0043392	negative regulation of DNA binding	6	1	0.86	1570	0.60557	0.60557
GO:0043649	dicarboxylic acid catabolic process	6	1	0.86	1571	0.60557	0.60557
GO:0043928	exonucleolytic nuclear-transcribed mRNA catabolic process involved in deadenylation-dependent decay	6	1	0.86	1572	0.60557	0.60557
GO:0044130	negative regulation of growth of symbiont in host	6	1	0.86	1573	0.60557	0.60557
GO:0045332	phospholipid translocation	6	1	0.86	1574	0.60557	0.60557
GO:0048148	behavioral response to cocaine	6	1	0.86	1575	0.60557	0.60557
GO:0048841	regulation of axon extension involved in axon guidance	6	1	0.86	1576	0.60557	0.60557
GO:0051224	negative regulation of protein transport	6	1	0.86	1577	0.60557	0.60557
GO:0051966	regulation of synaptic transmission, glutamatergic	6	1	0.86	1578	0.60557	0.60557
GO:0055078	sodium ion homeostasis	6	1	0.86	1579	0.60557	0.60557
GO:0061099	negative regulation of protein tyrosine kinase activity	6	1	0.86	1580	0.60557	0.60557
GO:0070129	regulation of mitochondrial translation	6	1	0.86	1581	0.60557	0.60557
GO:0070922	small RNA loading onto RISC	6	1	0.86	1582	0.60557	0.60557
GO:0090141	positive regulation of mitochondrial fission	6	1	0.86	1583	0.60557	0.60557
GO:0090481	pyrimidine nucleotide-sugar transmembrane transport	6	1	0.86	1584	0.60557	0.60557
GO:1901216	positive regulation of neuron death	6	1	0.86	1585	0.60557	0.60557
GO:1904747	positive regulation of apoptotic process involved in development	6	1	0.86	1586	0.60557	0.60557
GO:2000104	negative regulation of DNA-dependent DNA replication	6	1	0.86	1587	0.60557	0.60557
GO:2000105	positive regulation of DNA-dependent DNA replication	6	1	0.86	1588	0.60557	0.60557
GO:2000300	regulation of synaptic vesicle exocytosis	6	1	0.86	1589	0.60557	0.60557
GO:2000370	positive regulation of clathrin-dependent endocytosis	6	1	0.86	1590	0.60557	0.60557
GO:0046011	regulation of oskar mRNA translation	14	2	2.01	1617	0.61805	0.60563
GO:0003382	epithelial cell morphogenesis	23	3	3.3	1672	0.66172	0.60574
GO:0006308	DNA catabolic process	17	2	2.44	1869	0.7242	0.60579
GO:0071390	cellular response to ecdysone	17	2	2.44	1870	0.7242	0.60579
GO:0045927	positive regulation of growth	91	12	13.07	1752	0.67108	0.60604
GO:0051294	establishment of spindle orientation	22	2	3.16	2214	0.84549	0.60607
GO:0006959	humoral immune response	85	11	12.2	1788	0.6926	0.60609
GO:0043410	positive regulation of MAPK cascade	85	10	12.2	2071	0.79704	0.60647
GO:0048584	positive regulation of response to stimulus	377	50	54.13	1974	0.7549	0.60728
GO:0050684	regulation of mRNA processing	89	8	12.78	2554	0.95334	0.60745
GO:0031023	microtubule organizing center organization	72	4	10.34	2836	0.99495	0.60804
GO:0032259	methylation	114	9	16.37	2759	0.98817	0.60845
GO:0010628	positive regulation of gene expression	373	61	53.56	772	0.14655	0.60886
GO:0019752	carboxylic acid metabolic process	316	37	45.37	2468	0.93025	0.60893
GO:0051640	organelle localization	207	20	29.72	2724	0.98398	0.6094
GO:0051493	regulation of cytoskeleton organization	133	9	19.1	2891	0.99804	0.6095
GO:0035071	salivary gland cell autophagic cell death	26	4	3.73	1372	0.52479	0.6179
GO:0000028	ribosomal small subunit assembly	14	2	2.01	1618	0.61805	0.61805
GO:0006182	cGMP biosynthetic process	14	2	2.01	1619	0.61805	0.61805
GO:0008594	photoreceptor cell morphogenesis	14	2	2.01	1620	0.61805	0.61805
GO:0015718	monocarboxylic acid transport	22	3	3.16	1641	0.63087	0.61813
GO:0007254	JNK cascade	65	7	9.33	2178	0.84363	0.61936
GO:0008361	regulation of cell size	86	10	12.35	2094	0.8088	0.61937
GO:0046843	dorsal appendage formation	44	6	6.32	1629	0.62008	0.62008
GO:0006914	autophagy	140	12	20.1	2745	0.9866	0.62263
GO:0022402	cell cycle process	482	26	69.21	3082	1	0.62282
GO:0007281	germ cell development	621	75	89.16	2601	0.96257	0.62662
GO:0016322	neuron remodeling	47	10	6.75	747	0.12739	0.62664
GO:0006836	neurotransmitter transport	107	21	15.36	645	0.08081	0.62684
GO:0030431	sleep	62	11	8.9	1029	0.27121	0.62767
GO:0008283	cell proliferation	305	45	43.79	1280	0.44593	0.62844
GO:0007520	myoblast fusion	44	6	6.32	1630	0.62008	0.62984
GO:0009950	dorsal/ventral axis specification	70	10	10.05	1499	0.55924	0.6308
GO:2000331	regulation of terminal button organization	22	3	3.16	1642	0.63087	0.63087
GO:0007219	Notch signaling pathway	117	14	16.8	2092	0.80789	0.63271
GO:0065008	regulation of biological quality	1049	208	150.62	44	9e-08	0.63612
GO:0042594	response to starvation	109	9	15.65	2709	0.98161	0.64873
GO:0035151	regulation of tube size, open tracheal system	46	12	6.6	460	0.02575	0.65349
GO:0051094	positive regulation of developmental process	168	28	24.12	947	0.22271	0.6543
GO:0015711	organic anion transport	127	19	18.23	1299	0.46139	0.65606
GO:0019915	lipid storage	44	6	6.32	1631	0.62008	0.65666
GO:0032879	regulation of localization	351	62	50.4	548	0.04435	0.65762
GO:0035282	segmentation	198	38	28.43	500	0.03477	0.65852
GO:0003012	muscle system process	32	9	4.59	486	0.03191	0.66057
GO:0051480	regulation of cytosolic calcium ion concentration	20	6	2.87	573	0.05603	0.66106
GO:0050769	positive regulation of neurogenesis	64	12	9.19	891	0.20003	0.66118
GO:0043647	inositol phosphate metabolic process	15	4	2.15	825	0.15781	0.66155
GO:0070328	triglyceride homeostasis	23	3	3.3	1673	0.66172	0.66172
GO:0050807	regulation of synapse organization	124	19	17.8	1231	0.41746	0.66179
GO:0050688	regulation of defense response to virus	17	3	2.44	1286	0.44978	0.66204
GO:0006469	negative regulation of protein kinase activity	25	4	3.59	1344	0.49243	0.66209
GO:0006360	transcription by RNA polymerase I	13	2	1.87	1508	0.57629	0.6622
GO:0048260	positive regulation of receptor-mediated endocytosis	13	2	1.87	1509	0.57629	0.6622
GO:0000186	activation of MAPKK activity	7	1	1.01	1676	0.66225	0.66225
GO:0006044	N-acetylglucosamine metabolic process	7	1	1.01	1677	0.66225	0.66225
GO:0006207	'de novo' pyrimidine nucleobase biosynthetic process	7	1	1.01	1678	0.66225	0.66225
GO:0006513	protein monoubiquitination	7	1	1.01	1679	0.66225	0.66225
GO:0006662	glycerol ether metabolic process	7	1	1.01	1680	0.66225	0.66225
GO:0006967	positive regulation of antifungal peptide biosynthetic process	7	1	1.01	1681	0.66225	0.66225
GO:0007050	cell cycle arrest	7	1	1.01	1682	0.66225	0.66225
GO:0007111	meiosis II cytokinesis	7	1	1.01	1683	0.66225	0.66225
GO:0007312	oocyte nucleus migration involved in oocyte dorsal/ventral axis specification	7	1	1.01	1684	0.66225	0.66225
GO:0009074	aromatic amino acid family catabolic process	7	1	1.01	1685	0.66225	0.66225
GO:0010884	positive regulation of lipid storage	7	1	1.01	1686	0.66225	0.66225
GO:0015800	acidic amino acid transport	7	1	1.01	1687	0.66225	0.66225
GO:0018065	protein-cofactor linkage	7	1	1.01	1688	0.66225	0.66225
GO:0021551	central nervous system morphogenesis	7	1	1.01	1689	0.66225	0.66225
GO:0032368	regulation of lipid transport	7	1	1.01	1690	0.66225	0.66225
GO:0033353	S-adenosylmethionine cycle	7	1	1.01	1691	0.66225	0.66225
GO:0033539	fatty acid beta-oxidation using acyl-CoA dehydrogenase	7	1	1.01	1692	0.66225	0.66225
GO:0034475	U4 snRNA 3'-end processing	7	1	1.01	1693	0.66225	0.66225
GO:0035176	social behavior	7	1	1.01	1694	0.66225	0.66225
GO:0035190	syncytial nuclear migration	7	1	1.01	1695	0.66225	0.66225
GO:0035331	negative regulation of hippo signaling	7	1	1.01	1696	0.66225	0.66225
GO:0035335	peptidyl-tyrosine dephosphorylation	7	1	1.01	1697	0.66225	0.66225
GO:0042401	cellular biogenic amine biosynthetic process	7	1	1.01	1698	0.66225	0.66225
GO:0042595	behavioral response to starvation	7	1	1.01	1699	0.66225	0.66225
GO:0043652	engulfment of apoptotic cell	7	1	1.01	1700	0.66225	0.66225
GO:0043984	histone H4-K16 acetylation	7	1	1.01	1701	0.66225	0.66225
GO:0044728	DNA methylation or demethylation	7	1	1.01	1702	0.66225	0.66225
GO:0046533	negative regulation of photoreceptor cell differentiation	7	1	1.01	1703	0.66225	0.66225
GO:0046664	dorsal closure, amnioserosa morphology change	7	1	1.01	1704	0.66225	0.66225
GO:0046902	regulation of mitochondrial membrane permeability	7	1	1.01	1705	0.66225	0.66225
GO:0048042	regulation of post-mating oviposition	7	1	1.01	1706	0.66225	0.66225
GO:0048567	ectodermal digestive tract morphogenesis	7	1	1.01	1707	0.66225	0.66225
GO:0048791	calcium ion-regulated exocytosis of neurotransmitter	7	1	1.01	1708	0.66225	0.66225
GO:0051926	negative regulation of calcium ion transport	7	1	1.01	1709	0.66225	0.66225
GO:0060074	synapse maturation	7	1	1.01	1710	0.66225	0.66225
GO:0061357	positive regulation of Wnt protein secretion	7	1	1.01	1711	0.66225	0.66225
GO:0080009	mRNA methylation	7	1	1.01	1712	0.66225	0.66225
GO:0090527	actin filament reorganization	7	1	1.01	1713	0.66225	0.66225
GO:1900242	regulation of synaptic vesicle endocytosis	7	1	1.01	1714	0.66225	0.66225
GO:1901739	regulation of myoblast fusion	7	1	1.01	1715	0.66225	0.66225
GO:1903076	regulation of protein localization to plasma membrane	7	1	1.01	1716	0.66225	0.66225
GO:1903828	negative regulation of cellular protein localization	7	1	1.01	1717	0.66225	0.66225
GO:0030177	positive regulation of Wnt signaling pathway	35	5	5.03	1520	0.57833	0.66226
GO:0051494	negative regulation of cytoskeleton organization	29	4	4.16	1611	0.61527	0.66231
GO:0003383	apical constriction	17	2	2.44	1871	0.7242	0.66242
GO:0090068	positive regulation of cell cycle process	33	4	4.74	1861	0.71777	0.66253
GO:0035088	establishment or maintenance of apical/basal cell polarity	35	4	5.03	1982	0.76084	0.66264
GO:0034637	cellular carbohydrate biosynthetic process	23	2	3.3	2240	0.86299	0.66274
GO:0045333	cellular respiration	96	10	13.78	2349	0.89975	0.6637
GO:0048812	neuron projection morphogenesis	364	94	52.26	24	2.5e-09	0.66745
GO:0007275	multicellular organism development	1822	342	261.61	17	8.9e-10	0.66942
GO:0071702	organic substance transport	617	59	88.59	2970	0.99992	0.67429
GO:0055088	lipid homeostasis	63	8	9.05	1792	0.70095	0.67771
GO:0006820	anion transport	170	30	24.41	757	0.13102	0.68866
GO:0007526	larval somatic muscle development	24	3	3.45	1766	0.69066	0.69066
GO:0036099	female germ-line stem cell population maintenance	24	3	3.45	1767	0.69066	0.69066
GO:0046329	negative regulation of JNK cascade	24	3	3.45	1768	0.69066	0.69066
GO:0071902	positive regulation of protein serine/threonine kinase activity	35	5	5.03	1521	0.57833	0.69176
GO:0032012	regulation of ARF protein signal transduction	16	2	2.3	1775	0.69191	0.69191
GO:0035212	cell competition in a multicellular organism	16	2	2.3	1776	0.69191	0.69191
GO:0046854	phosphatidylinositol phosphorylation	16	2	2.3	1777	0.69191	0.69191
GO:0009887	animal organ morphogenesis	603	129	86.58	57	6.6e-07	0.69319
GO:0044087	regulation of cellular component biogenesis	269	30	38.62	2542	0.9508	0.69655
GO:0048477	oogenesis	552	69	79.26	2402	0.91463	0.69881
GO:0009408	response to heat	67	6	9.62	2473	0.93336	0.70192
GO:1901576	organic substance biosynthetic process	1984	204	284.87	3074	1	0.70211
GO:0006397	mRNA processing	278	13	39.92	3046	1	0.70655
GO:0006810	transport	1370	204	196.71	1033	0.2793	0.70743
GO:0098930	axonal transport	23	4	3.3	1236	0.42522	0.71048
GO:0006536	glutamate metabolic process	13	2	1.87	1510	0.57629	0.71069
GO:0046173	polyol biosynthetic process	13	2	1.87	1511	0.57629	0.71069
GO:0006376	mRNA splice site selection	8	1	1.15	1796	0.71079	0.71079
GO:0006896	Golgi to vacuole transport	8	1	1.15	1797	0.71079	0.71079
GO:0007215	glutamate receptor signaling pathway	8	1	1.15	1798	0.71079	0.71079
GO:0007289	spermatid nucleus differentiation	8	1	1.15	1799	0.71079	0.71079
GO:0007319	negative regulation of oskar mRNA translation	8	1	1.15	1800	0.71079	0.71079
GO:0007343	egg activation	8	1	1.15	1801	0.71079	0.71079
GO:0007395	dorsal closure, spreading of leading edge cells	8	1	1.15	1802	0.71079	0.71079
GO:0008057	eye pigment granule organization	8	1	1.15	1803	0.71079	0.71079
GO:0008637	apoptotic mitochondrial changes	8	1	1.15	1804	0.71079	0.71079
GO:0009651	response to salt stress	8	1	1.15	1805	0.71079	0.71079
GO:0015807	L-amino acid transport	8	1	1.15	1806	0.71079	0.71079
GO:0018279	protein N-linked glycosylation via asparagine	8	1	1.15	1807	0.71079	0.71079
GO:0030042	actin filament depolymerization	8	1	1.15	1808	0.71079	0.71079
GO:0030206	chondroitin sulfate biosynthetic process	8	1	1.15	1809	0.71079	0.71079
GO:0032239	regulation of nucleobase-containing compound transport	8	1	1.15	1810	0.71079	0.71079
GO:0032387	negative regulation of intracellular transport	8	1	1.15	1811	0.71079	0.71079
GO:0033314	mitotic DNA replication checkpoint	8	1	1.15	1812	0.71079	0.71079
GO:0034427	nuclear-transcribed mRNA catabolic process, exonucleolytic, 3'-5'	8	1	1.15	1813	0.71079	0.71079
GO:0034975	protein folding in endoplasmic reticulum	8	1	1.15	1814	0.71079	0.71079
GO:0042135	neurotransmitter catabolic process	8	1	1.15	1815	0.71079	0.71079
GO:0043407	negative regulation of MAP kinase activity	8	1	1.15	1816	0.71079	0.71079
GO:0045477	regulation of nurse cell apoptotic process	8	1	1.15	1817	0.71079	0.71079
GO:0046686	response to cadmium ion	8	1	1.15	1818	0.71079	0.71079
GO:0048096	chromatin-mediated maintenance of transcription	8	1	1.15	1819	0.71079	0.71079
GO:0048790	maintenance of presynaptic active zone structure	8	1	1.15	1820	0.71079	0.71079
GO:0048935	peripheral nervous system neuron development	8	1	1.15	1821	0.71079	0.71079
GO:0055075	potassium ion homeostasis	8	1	1.15	1822	0.71079	0.71079
GO:0061028	establishment of endothelial barrier	8	1	1.15	1823	0.71079	0.71079
GO:0070072	vacuolar proton-transporting V-type ATPase complex assembly	8	1	1.15	1824	0.71079	0.71079
GO:0072697	protein localization to cell cortex	8	1	1.15	1825	0.71079	0.71079
GO:0098586	cellular response to virus	8	1	1.15	1826	0.71079	0.71079
GO:1903053	regulation of extracellular matrix organization	8	1	1.15	1827	0.71079	0.71079
GO:1904262	negative regulation of TORC1 signaling	8	1	1.15	1828	0.71079	0.71079
GO:2000242	negative regulation of reproductive process	8	1	1.15	1829	0.71079	0.71079
GO:2001235	positive regulation of apoptotic signaling pathway	8	1	1.15	1830	0.71079	0.71079
GO:0045476	nurse cell apoptotic process	16	2	2.3	1778	0.69191	0.71085
GO:0042593	glucose homeostasis	30	4	4.31	1650	0.64292	0.71751
GO:0007317	regulation of pole plasm oskar mRNA localization	25	3	3.59	1851	0.71769	0.71769
GO:0045887	positive regulation of synaptic growth at neuromuscular junction	25	3	3.59	1852	0.71769	0.71769
GO:0033554	cellular response to stress	492	29	70.64	3071	1	0.7189
GO:0008152	metabolic process	4473	546	642.24	3083	1	0.71918
GO:0048190	wing disc dorsal/ventral pattern formation	41	5	5.89	1864	0.72057	0.72057
GO:0044248	cellular catabolic process	696	73	99.93	2931	0.99938	0.72158
GO:0007173	epidermal growth factor receptor signaling pathway	63	11	9.05	1060	0.28943	0.72293
GO:0045471	response to ethanol	65	10	9.33	1296	0.45973	0.72361
GO:0048489	synaptic vesicle transport	65	10	9.33	1297	0.45973	0.72361
GO:0000079	regulation of cyclin-dependent protein serine/threonine kinase activity	17	2	2.44	1872	0.7242	0.7242
GO:0006096	glycolytic process	17	2	2.44	1873	0.7242	0.7242
GO:0006446	regulation of translational initiation	17	2	2.44	1874	0.7242	0.7242
GO:0009312	oligosaccharide biosynthetic process	17	2	2.44	1875	0.7242	0.7242
GO:0035099	hemocyte migration	17	2	2.44	1876	0.7242	0.7242
GO:0048137	spermatocyte division	17	2	2.44	1877	0.7242	0.7242
GO:0007097	nuclear migration	31	4	4.45	1748	0.66924	0.7242
GO:0045184	establishment of protein localization	395	20	56.71	3070	1	0.7248
GO:0002165	instar larval or pupal development	444	90	63.75	159	0.00028	0.74212
GO:0008340	determination of adult lifespan	134	17	19.24	1914	0.74718	0.74718
GO:0007626	locomotory behavior	144	27	20.68	653	0.08439	0.74995
GO:0036011	imaginal disc-derived leg segmentation	21	8	3.02	319	0.0063	0.75047
GO:0030334	regulation of cell migration	31	9	4.45	463	0.02616	0.75063
GO:0045456	ecdysteroid biosynthetic process	20	5	2.87	775	0.14852	0.7515
GO:0046621	negative regulation of organ growth	18	3	2.58	1335	0.4892	0.75211
GO:0030111	regulation of Wnt signaling pathway	75	11	10.77	1361	0.51993	0.75218
GO:0006094	gluconeogenesis	9	1	1.29	1918	0.75236	0.75236
GO:0006122	mitochondrial electron transport, ubiquinol to cytochrome c	9	1	1.29	1919	0.75236	0.75236
GO:0006152	purine nucleoside catabolic process	9	1	1.29	1920	0.75236	0.75236
GO:0006171	cAMP biosynthetic process	9	1	1.29	1921	0.75236	0.75236
GO:0006309	apoptotic DNA fragmentation	9	1	1.29	1922	0.75236	0.75236
GO:0006390	mitochondrial transcription	9	1	1.29	1923	0.75236	0.75236
GO:0006855	drug transmembrane transport	9	1	1.29	1924	0.75236	0.75236
GO:0009086	methionine biosynthetic process	9	1	1.29	1925	0.75236	0.75236
GO:0009253	peptidoglycan catabolic process	9	1	1.29	1926	0.75236	0.75236
GO:0031000	response to caffeine	9	1	1.29	1927	0.75236	0.75236
GO:0033363	secretory granule organization	9	1	1.29	1928	0.75236	0.75236
GO:0045003	double-strand break repair via synthesis-dependent strand annealing	9	1	1.29	1929	0.75236	0.75236
GO:0048140	male germ-line cyst encapsulation	9	1	1.29	1930	0.75236	0.75236
GO:0048679	regulation of axon regeneration	9	1	1.29	1931	0.75236	0.75236
GO:0050686	negative regulation of mRNA processing	9	1	1.29	1932	0.75236	0.75236
GO:0060232	delamination	9	1	1.29	1933	0.75236	0.75236
GO:0060251	regulation of glial cell proliferation	9	1	1.29	1934	0.75236	0.75236
GO:0070278	extracellular matrix constituent secretion	9	1	1.29	1935	0.75236	0.75236
GO:0071028	nuclear mRNA surveillance	9	1	1.29	1936	0.75236	0.75236
GO:0071481	cellular response to X-ray	9	1	1.29	1937	0.75236	0.75236
GO:0090136	epithelial cell-cell adhesion	9	1	1.29	1938	0.75236	0.75236
GO:0090328	regulation of olfactory learning	9	1	1.29	1939	0.75236	0.75236
GO:0009072	aromatic amino acid family metabolic process	16	2	2.3	1779	0.69191	0.75236
GO:0008595	anterior/posterior axis specification, embryo	114	16	16.37	1523	0.58075	0.75239
GO:0034620	cellular response to unfolded protein	27	3	3.88	1987	0.76619	0.75257
GO:1901605	alpha-amino acid metabolic process	88	11	12.64	1896	0.73628	0.75285
GO:0045937	positive regulation of phosphate metabolic process	146	18	20.96	2068	0.79304	0.75334
GO:0007465	R7 cell fate commitment	18	2	2.58	1957	0.75357	0.75357
GO:0015986	ATP synthesis coupled proton transport	18	2	2.58	1958	0.75357	0.75357
GO:0030488	tRNA methylation	18	2	2.58	1959	0.75357	0.75357
GO:0030968	endoplasmic reticulum unfolded protein response	18	2	2.58	1960	0.75357	0.75357
GO:0032436	positive regulation of proteasomal ubiquitin-dependent protein catabolic process	18	2	2.58	1961	0.75357	0.75357
GO:0097352	autophagosome maturation	18	2	2.58	1962	0.75357	0.75357
GO:0035317	imaginal disc-derived wing hair organization	39	4	5.6	2166	0.83142	0.75408
GO:0042078	germ-line stem cell division	37	3	5.31	2421	0.91677	0.75444
GO:0016458	gene silencing	165	7	23.69	3013	1	0.75828
GO:0045747	positive regulation of Notch signaling pathway	35	4	5.03	1983	0.76084	0.76084
GO:0017148	negative regulation of translation	73	7	10.48	2403	0.91561	0.76255
GO:0010506	regulation of autophagy	86	7	12.35	2658	0.9725	0.76386
GO:0022008	neurogenesis	716	162	102.8	12	2.4e-10	0.76448
GO:0035011	melanotic encapsulation of foreign target	27	3	3.88	1988	0.76619	0.76619
GO:0043604	amide biosynthetic process	449	26	64.47	3062	1	0.77324
GO:0031328	positive regulation of cellular biosynthetic process	385	61	55.28	940	0.21595	0.77693
GO:0016192	vesicle-mediated transport	465	43	66.77	2945	0.99976	0.77766
GO:0006979	response to oxidative stress	103	12	14.79	2137	0.82309	0.77878
GO:0045165	cell fate commitment	261	61	37.47	114	5.1e-05	0.7794
GO:0042332	gravitaxis	19	2	2.73	2002	0.7802	0.7802
GO:0045087	innate immune response	164	18	23.55	2424	0.91747	0.7806
GO:0008063	Toll signaling pathway	40	3	5.74	2504	0.94034	0.78118
GO:0002168	instar larval development	60	13	8.61	639	0.08058	0.78463
GO:0007350	blastoderm segmentation	169	32	24.27	579	0.05798	0.78512
GO:0045187	regulation of circadian sleep/wake cycle, sleep	23	6	3.3	692	0.10071	0.7869
GO:0008306	associative learning	48	9	6.89	972	0.24468	0.78709
GO:0051489	regulation of filopodium assembly	31	5	4.45	1303	0.46528	0.78763
GO:0051017	actin filament bundle assembly	28	3	4.02	2016	0.78777	0.78777
GO:0055070	copper ion homeostasis	16	2	2.3	1780	0.69191	0.78792
GO:0000726	non-recombinational repair	10	1	1.44	2020	0.78796	0.78796
GO:0002221	pattern recognition receptor signaling pathway	10	1	1.44	2021	0.78796	0.78796
GO:0003384	apical constriction involved in gastrulation	10	1	1.44	2022	0.78796	0.78796
GO:0007488	histoblast morphogenesis	10	1	1.44	2023	0.78796	0.78796
GO:0016075	rRNA catabolic process	10	1	1.44	2024	0.78796	0.78796
GO:0018230	peptidyl-L-cysteine S-palmitoylation	10	1	1.44	2025	0.78796	0.78796
GO:0030708	germarium-derived female germ-line cyst encapsulation	10	1	1.44	2026	0.78796	0.78796
GO:0030723	ovarian fusome organization	10	1	1.44	2027	0.78796	0.78796
GO:0040020	regulation of meiotic nuclear division	10	1	1.44	2028	0.78796	0.78796
GO:0042246	tissue regeneration	10	1	1.44	2029	0.78796	0.78796
GO:0043488	regulation of mRNA stability	10	1	1.44	2030	0.78796	0.78796
GO:0045292	mRNA cis splicing, via spliceosome	10	1	1.44	2031	0.78796	0.78796
GO:0045572	positive regulation of imaginal disc growth	10	1	1.44	2032	0.78796	0.78796
GO:0045752	positive regulation of Toll signaling pathway	10	1	1.44	2033	0.78796	0.78796
GO:0046889	positive regulation of lipid biosynthetic process	10	1	1.44	2034	0.78796	0.78796
GO:0047496	vesicle transport along microtubule	10	1	1.44	2035	0.78796	0.78796
GO:0048082	regulation of adult chitin-containing cuticle pigmentation	10	1	1.44	2036	0.78796	0.78796
GO:0050775	positive regulation of dendrite morphogenesis	10	1	1.44	2037	0.78796	0.78796
GO:0051085	chaperone cofactor-dependent protein refolding	10	1	1.44	2038	0.78796	0.78796
GO:0060326	cell chemotaxis	10	1	1.44	2039	0.78796	0.78796
GO:0071230	cellular response to amino acid stimulus	10	1	1.44	2040	0.78796	0.78796
GO:1905881	positive regulation of oogenesis	10	1	1.44	2041	0.78796	0.78796
GO:0006576	cellular biogenic amine metabolic process	17	2	2.44	1878	0.7242	0.78796
GO:0006458	'de novo' protein folding	21	2	3.02	2140	0.82598	0.78816
GO:0009620	response to fungus	49	6	7.04	1894	0.72464	0.78817
GO:0007405	neuroblast proliferation	84	10	12.06	2013	0.78475	0.78852
GO:0031330	negative regulation of cellular catabolic process	31	2	4.45	2537	0.94958	0.78865
GO:0044282	small molecule catabolic process	119	11	17.09	2607	0.96511	0.78991
GO:0006260	DNA replication	99	5	14.21	2916	0.99921	0.79096
GO:0048522	positive regulation of cellular process	1032	127	148.18	2722	0.98239	0.79604
GO:0042752	regulation of circadian rhythm	62	14	8.9	568	0.05332	0.80151
GO:0000027	ribosomal large subunit assembly	20	2	2.87	2073	0.80428	0.80428
GO:0006081	cellular aldehyde metabolic process	20	2	2.87	2074	0.80428	0.80428
GO:0007279	pole cell formation	20	2	2.87	2075	0.80428	0.80428
GO:0032102	negative regulation of response to external stimulus	20	2	2.87	2076	0.80428	0.80428
GO:0046580	negative regulation of Ras protein signal transduction	20	2	2.87	2077	0.80428	0.80428
GO:0007286	spermatid development	60	4	8.61	2704	0.98006	0.806
GO:0006120	mitochondrial electron transport, NADH to ubiquinone	29	3	4.16	2086	0.80768	0.80768
GO:0098655	cation transmembrane transport	138	34	19.81	199	0.00086	0.81359
GO:0031146	SCF-dependent proteasomal ubiquitin-dependent protein catabolic process	38	4	5.46	2096	0.81562	0.81562
GO:0055059	asymmetric neuroblast division	38	4	5.46	2097	0.81562	0.81562
GO:1901136	carbohydrate derivative catabolic process	62	14	8.9	569	0.05332	0.81661
GO:0098656	anion transmembrane transport	70	15	10.05	626	0.06909	0.81666
GO:0007379	segment specification	22	6	3.16	652	0.08419	0.81735
GO:0046620	regulation of organ growth	48	8	6.89	1207	0.38345	0.81791
GO:0007110	meiosis I cytokinesis	11	1	1.58	2100	0.81845	0.81845
GO:0007394	dorsal closure, elongation of leading edge cells	11	1	1.58	2101	0.81845	0.81845
GO:0008366	axon ensheathment	11	1	1.58	2102	0.81845	0.81845
GO:0010906	regulation of glucose metabolic process	11	1	1.58	2103	0.81845	0.81845
GO:0030837	negative regulation of actin filament polymerization	11	1	1.58	2104	0.81845	0.81845
GO:0031440	regulation of mRNA 3'-end processing	11	1	1.58	2105	0.81845	0.81845
GO:0034331	cell junction maintenance	11	1	1.58	2106	0.81845	0.81845
GO:0035076	ecdysone receptor-mediated signaling pathway	11	1	1.58	2107	0.81845	0.81845
GO:0042559	pteridine-containing compound biosynthetic process	11	1	1.58	2108	0.81845	0.81845
GO:0046426	negative regulation of JAK-STAT cascade	11	1	1.58	2109	0.81845	0.81845
GO:0046856	phosphatidylinositol dephosphorylation	11	1	1.58	2110	0.81845	0.81845
GO:0048311	mitochondrion distribution	11	1	1.58	2111	0.81845	0.81845
GO:0051181	cofactor transport	11	1	1.58	2112	0.81845	0.81845
GO:0060964	regulation of gene silencing by miRNA	11	1	1.58	2113	0.81845	0.81845
GO:0071480	cellular response to gamma radiation	11	1	1.58	2114	0.81845	0.81845
GO:0090303	positive regulation of wound healing	11	1	1.58	2115	0.81845	0.81845
GO:0097501	stress response to metal ion	11	1	1.58	2116	0.81845	0.81845
GO:2000765	regulation of cytoplasmic translation	11	1	1.58	2117	0.81845	0.81845
GO:0051054	positive regulation of DNA metabolic process	20	2	2.87	2078	0.80428	0.81854
GO:0038202	TORC1 signaling	36	3	5.17	2386	0.90719	0.81896
GO:0031098	stress-activated protein kinase signaling cascade	79	8	11.34	2347	0.8973	0.81934
GO:0009266	response to temperature stimulus	105	15	15.08	1491	0.55147	0.82557
GO:0001737	establishment of imaginal disc-derived wing hair orientation	21	2	3.02	2141	0.82598	0.82598
GO:0007009	plasma membrane organization	21	2	3.02	2142	0.82598	0.82598
GO:0046330	positive regulation of JNK cascade	21	2	3.02	2143	0.82598	0.82598
GO:0031532	actin cytoskeleton reorganization	28	3	4.02	2017	0.78777	0.82598
GO:0008380	RNA splicing	243	10	34.89	3047	1	0.82633
GO:0006790	sulfur compound metabolic process	128	16	18.38	1986	0.76368	0.82659
GO:0022416	chaeta development	60	10	8.61	1158	0.35736	0.84136
GO:0045089	positive regulation of innate immune response	47	7	6.75	1366	0.52144	0.84193
GO:0006099	tricarboxylic acid cycle	31	3	4.45	2173	0.84278	0.84278
GO:0045727	positive regulation of translation	31	3	4.45	2174	0.84278	0.84278
GO:2000027	regulation of organ morphogenesis	75	15	10.77	713	0.11124	0.84306
GO:1901607	alpha-amino acid biosynthetic process	37	7	5.31	1030	0.27558	0.84383
GO:0031032	actomyosin structure organization	86	13	12.35	1304	0.46688	0.84414
GO:0006470	protein dephosphorylation	84	9	12.06	2283	0.87007	0.84416
GO:0007297	ovarian follicle cell migration	118	17	16.94	1398	0.53454	0.84432
GO:0017157	regulation of exocytosis	24	3	3.45	1769	0.69066	0.84447
GO:0000060	protein import into nucleus, translocation	12	1	1.72	2180	0.84456	0.84456
GO:0002098	tRNA wobble uridine modification	12	1	1.72	2181	0.84456	0.84456
GO:0006998	nuclear envelope organization	12	1	1.72	2182	0.84456	0.84456
GO:0007032	endosome organization	12	1	1.72	2183	0.84456	0.84456
GO:0007220	Notch receptor processing	12	1	1.72	2184	0.84456	0.84456
GO:0008069	dorsal/ventral axis specification, ovarian follicular epithelium	12	1	1.72	2185	0.84456	0.84456
GO:0009065	glutamine family amino acid catabolic process	12	1	1.72	2186	0.84456	0.84456
GO:0009855	determination of bilateral symmetry	12	1	1.72	2187	0.84456	0.84456
GO:0016082	synaptic vesicle priming	12	1	1.72	2188	0.84456	0.84456
GO:0018023	peptidyl-lysine trimethylation	12	1	1.72	2189	0.84456	0.84456
GO:0018107	peptidyl-threonine phosphorylation	12	1	1.72	2190	0.84456	0.84456
GO:0032483	regulation of Rab protein signal transduction	12	1	1.72	2191	0.84456	0.84456
GO:0034389	lipid particle organization	12	1	1.72	2192	0.84456	0.84456
GO:0034614	cellular response to reactive oxygen species	12	1	1.72	2193	0.84456	0.84456
GO:0035304	regulation of protein dephosphorylation	12	1	1.72	2194	0.84456	0.84456
GO:0043001	Golgi to plasma membrane protein transport	12	1	1.72	2195	0.84456	0.84456
GO:0043687	post-translational protein modification	12	1	1.72	2196	0.84456	0.84456
GO:0045175	basal protein localization	12	1	1.72	2197	0.84456	0.84456
GO:0045676	regulation of R7 cell differentiation	12	1	1.72	2198	0.84456	0.84456
GO:0046835	carbohydrate phosphorylation	12	1	1.72	2199	0.84456	0.84456
GO:0055069	zinc ion homeostasis	12	1	1.72	2200	0.84456	0.84456
GO:1905515	non-motile cilium assembly	12	1	1.72	2201	0.84456	0.84456
GO:0016476	regulation of embryonic cell shape	23	2	3.3	2241	0.86299	0.84473
GO:0061057	peptidoglycan recognition protein signaling pathway	22	2	3.16	2215	0.84549	0.84549
GO:0009116	nucleoside metabolic process	48	3	6.89	2689	0.97639	0.84551
GO:0009062	fatty acid catabolic process	44	2	6.32	2787	0.991	0.84563
GO:0006749	glutathione metabolic process	40	4	5.74	2219	0.84609	0.84609
GO:0090305	nucleic acid phosphodiester bond hydrolysis	69	3	9.91	2896	0.99828	0.84641
GO:0006518	peptide metabolic process	497	34	71.36	3049	1	0.8559
GO:0007099	centriole replication	23	2	3.3	2242	0.86299	0.86299
GO:0031122	cytoplasmic microtubule organization	23	2	3.3	2243	0.86299	0.86299
GO:0035096	larval midgut cell programmed cell death	23	2	3.3	2244	0.86299	0.86299
GO:0051302	regulation of cell division	23	2	3.3	2245	0.86299	0.86299
GO:0046777	protein autophosphorylation	37	3	5.31	2422	0.91677	0.86338
GO:0016042	lipid catabolic process	96	11	13.78	2169	0.83167	0.86357
GO:0002237	response to molecule of bacterial origin	13	1	1.87	2255	0.86691	0.86691
GO:0007527	adult somatic muscle development	13	1	1.87	2256	0.86691	0.86691
GO:0015696	ammonium transport	13	1	1.87	2257	0.86691	0.86691
GO:0030514	negative regulation of BMP signaling pathway	13	1	1.87	2258	0.86691	0.86691
GO:0030720	oocyte localization involved in germarium-derived egg chamber formation	13	1	1.87	2259	0.86691	0.86691
GO:0045880	positive regulation of smoothened signaling pathway	13	1	1.87	2260	0.86691	0.86691
GO:0046427	positive regulation of JAK-STAT cascade	13	1	1.87	2261	0.86691	0.86691
GO:0000245	spliceosomal complex assembly	21	2	3.02	2144	0.82598	0.86695
GO:0006090	pyruvate metabolic process	30	3	4.31	2159	0.82599	0.86703
GO:0010508	positive regulation of autophagy	28	2	4.02	2436	0.92614	0.86723
GO:0042127	regulation of cell proliferation	192	31	27.57	1027	0.26559	0.86985
GO:0006796	phosphate-containing compound metabolic process	815	99	117.02	2694	0.97688	0.87218
GO:0001745	compound eye morphogenesis	247	54	35.46	195	0.00078	0.87392
GO:0008104	protein localization	570	42	81.84	3045	1	0.87648
GO:0007310	oocyte dorsal/ventral axis specification	40	7	5.74	1148	0.34871	0.87768
GO:0071456	cellular response to hypoxia	24	2	3.45	2298	0.87866	0.87866
GO:0006487	protein N-linked glycosylation	32	3	4.59	2228	0.85815	0.87871
GO:2000736	regulation of stem cell differentiation	26	5	3.73	1069	0.31445	0.88547
GO:0007631	feeding behavior	33	6	4.74	1140	0.33399	0.88547
GO:0010529	negative regulation of transposition	14	1	2.01	2317	0.88605	0.88605
GO:0016081	synaptic vesicle docking	14	1	2.01	2318	0.88605	0.88605
GO:0030422	production of siRNA involved in RNA interference	14	1	2.01	2319	0.88605	0.88605
GO:0038083	peptidyl-tyrosine autophosphorylation	14	1	2.01	2320	0.88605	0.88605
GO:0042026	protein refolding	14	1	2.01	2321	0.88605	0.88605
GO:0045840	positive regulation of mitotic nuclear division	14	1	2.01	2322	0.88605	0.88605
GO:1900180	regulation of protein localization to nucleus	14	1	2.01	2323	0.88605	0.88605
GO:2000134	negative regulation of G1/S transition of mitotic cell cycle	14	1	2.01	2324	0.88605	0.88605
GO:0016334	establishment or maintenance of polarity of follicular epithelium	26	2	3.73	2374	0.90514	0.88624
GO:0035006	melanization defense response	41	4	5.89	2232	0.85965	0.88628
GO:0016246	RNA interference	30	2	4.31	2518	0.94269	0.88639
GO:0044255	cellular lipid metabolic process	302	39	43.36	2064	0.79066	0.88695
GO:0007018	microtubule-based movement	88	12	12.64	1635	0.6236	0.89234
GO:1901606	alpha-amino acid catabolic process	37	3	5.31	2423	0.91677	0.8929
GO:0006417	regulation of translation	144	15	20.68	2485	0.93603	0.89404
GO:0022607	cellular component assembly	945	105	135.68	2921	0.99928	0.89448
GO:0006996	organelle organization	1453	113	208.62	3099	1	0.8962
GO:0019991	septate junction assembly	35	3	5.03	2344	0.89662	0.89662
GO:0006468	protein phosphorylation	370	41	53.13	2667	0.97564	0.89857
GO:0061024	membrane organization	202	19	29	2757	0.98738	0.89976
GO:0043901	negative regulation of multi-organism process	26	3	3.73	1907	0.74285	0.90235
GO:0006282	regulation of DNA repair	15	1	2.15	2353	0.90245	0.90245
GO:0007303	cytoplasmic transport, nurse cell to oocyte	15	1	2.15	2354	0.90245	0.90245
GO:0007629	flight behavior	15	1	2.15	2355	0.90245	0.90245
GO:0008630	intrinsic apoptotic signaling pathway in response to DNA damage	15	1	2.15	2356	0.90245	0.90245
GO:0016239	positive regulation of macroautophagy	15	1	2.15	2357	0.90245	0.90245
GO:0032968	positive regulation of transcription elongation from RNA polymerase II promoter	15	1	2.15	2358	0.90245	0.90245
GO:0035073	pupariation	15	1	2.15	2359	0.90245	0.90245
GO:0048132	female germ-line stem cell asymmetric division	15	1	2.15	2360	0.90245	0.90245
GO:0044272	sulfur compound biosynthetic process	33	3	4.74	2286	0.87219	0.90258
GO:0090630	activation of GTPase activity	26	2	3.73	2375	0.90514	0.90514
GO:0007059	chromosome segregation	170	6	24.41	3027	1	0.9065
GO:0006302	double-strand break repair	69	3	9.91	2897	0.99828	0.90674
GO:0007346	regulation of mitotic cell cycle	172	15	24.7	2791	0.99114	0.90994
GO:0006351	transcription, DNA-templated	933	116	133.96	2637	0.96916	0.91077
GO:0008284	positive regulation of cell proliferation	58	9	8.33	1290	0.4566	0.91182
GO:0070374	positive regulation of ERK1 and ERK2 cascade	46	4	6.6	2395	0.91312	0.91312
GO:0040008	regulation of growth	261	44	37.47	764	0.13995	0.91474
GO:0042023	DNA endoreduplication	22	3	3.16	1643	0.63087	0.91624
GO:0008593	regulation of Notch signaling pathway	95	11	13.64	2136	0.82141	0.91648
GO:0000132	establishment of mitotic spindle orientation	16	1	2.3	2410	0.91648	0.91648
GO:0007370	ventral furrow formation	16	1	2.3	2411	0.91648	0.91648
GO:0033692	cellular polysaccharide biosynthetic process	16	1	2.3	2412	0.91648	0.91648
GO:0035025	positive regulation of Rho protein signal transduction	16	1	2.3	2413	0.91648	0.91648
GO:0035196	production of miRNAs involved in gene silencing by miRNA	16	1	2.3	2414	0.91648	0.91648
GO:0051642	centrosome localization	16	1	2.3	2415	0.91648	0.91648
GO:0001510	RNA methylation	41	4	5.89	2233	0.85965	0.91661
GO:0030097	hemopoiesis	72	8	10.34	2163	0.83067	0.91671
GO:0006575	cellular modified amino acid metabolic process	63	6	9.05	2382	0.90589	0.91686
GO:0008298	intracellular mRNA localization	77	5	11.06	2777	0.99038	0.91751
GO:0030163	protein catabolic process	258	16	37.04	3008	0.99999	0.92076
GO:0098662	inorganic cation transmembrane transport	125	33	17.95	156	0.00027	0.92517
GO:0045454	cell redox homeostasis	28	2	4.02	2437	0.92614	0.92614
GO:0045793	positive regulation of cell size	28	2	4.02	2438	0.92614	0.92614
GO:0030261	chromosome condensation	48	3	6.89	2690	0.97639	0.92663
GO:0034613	cellular protein localization	440	25	63.18	3063	1	0.92665
GO:0006641	triglyceride metabolic process	28	4	4.02	1526	0.58631	0.92822
GO:0051568	histone H3-K4 methylation	22	2	3.16	2216	0.84549	0.92845
GO:0006887	exocytosis	78	10	11.2	1791	0.69994	0.92845
GO:0007041	lysosomal transport	17	1	2.44	2448	0.9285	0.9285
GO:0007282	cystoblast division	17	1	2.44	2449	0.9285	0.9285
GO:0035019	somatic stem cell population maintenance	17	1	2.44	2450	0.9285	0.9285
GO:0042136	neurotransmitter biosynthetic process	17	1	2.44	2451	0.9285	0.9285
GO:0060856	establishment of blood-brain barrier	17	1	2.44	2452	0.9285	0.9285
GO:1904263	positive regulation of TORC1 signaling	17	1	2.44	2453	0.9285	0.9285
GO:0030100	regulation of endocytosis	52	6	7.47	1993	0.77683	0.92851
GO:0010647	positive regulation of cell communication	311	37	44.65	2399	0.91375	0.92976
GO:0023056	positive regulation of signaling	311	37	44.65	2400	0.91375	0.92976
GO:0090407	organophosphate biosynthetic process	182	9	26.13	3005	0.99999	0.93157
GO:0044271	cellular nitrogen compound biosynthetic process	1531	149	219.82	3066	1	0.93346
GO:0000723	telomere maintenance	29	2	4.16	2479	0.93491	0.93491
GO:0016321	female meiosis chromosome segregation	29	2	4.16	2480	0.93491	0.93491
GO:0016567	protein ubiquitination	154	13	22.11	2790	0.99106	0.93579
GO:0098754	detoxification	26	6	3.73	834	0.15935	0.93811
GO:0007163	establishment or maintenance of cell polarity	185	27	26.56	1353	0.49569	0.93843
GO:0045197	establishment or maintenance of epithelial cell apical/basal polarity	27	3	3.88	1989	0.76619	0.93867
GO:0034332	adherens junction organization	36	4	5.17	2011	0.78037	0.93872
GO:0030011	maintenance of cell polarity	18	1	2.58	2490	0.93879	0.93879
GO:0030433	ubiquitin-dependent ERAD pathway	18	1	2.58	2491	0.93879	0.93879
GO:0031507	heterochromatin assembly	18	1	2.58	2492	0.93879	0.93879
GO:0043280	positive regulation of cysteine-type endopeptidase activity involved in apoptotic process	18	1	2.58	2493	0.93879	0.93879
GO:0006400	tRNA modification	48	4	6.89	2464	0.92883	0.93902
GO:0031647	regulation of protein stability	48	3	6.89	2691	0.97639	0.9392
GO:0051495	positive regulation of cytoskeleton organization	52	2	7.47	2864	0.997	0.93948
GO:0009967	positive regulation of signal transduction	292	36	41.93	2253	0.86412	0.93959
GO:0018105	peptidyl-serine phosphorylation	40	3	5.74	2505	0.94034	0.94034
GO:0033108	mitochondrial respiratory chain complex assembly	30	2	4.31	2519	0.94269	0.94269
GO:0050821	protein stabilization	30	2	4.31	2520	0.94269	0.94269
GO:0050829	defense response to Gram-negative bacterium	82	8	11.77	2425	0.91824	0.94419
GO:0016579	protein deubiquitination	41	3	5.89	2526	0.94672	0.94672
GO:0006950	response to stress	956	94	137.26	3015	1	0.94673
GO:0006839	mitochondrial transport	77	5	11.06	2778	0.99038	0.9475
GO:0043523	regulation of neuron apoptotic process	19	1	2.73	2527	0.9476	0.9476
GO:0045792	negative regulation of cell size	19	1	2.73	2528	0.9476	0.9476
GO:0007406	negative regulation of neuroblast proliferation	31	2	4.45	2538	0.94958	0.94958
GO:0043547	positive regulation of GTPase activity	57	4	8.18	2656	0.9723	0.94994
GO:0007010	cytoskeleton organization	500	55	71.79	2785	0.99061	0.95013
GO:0000413	protein peptidyl-prolyl isomerization	20	1	2.87	2557	0.95514	0.95514
GO:0000915	actomyosin contractile ring assembly	20	1	2.87	2558	0.95514	0.95514
GO:0007076	mitotic chromosome condensation	20	1	2.87	2559	0.95514	0.95514
GO:0015991	ATP hydrolysis coupled proton transport	20	1	2.87	2560	0.95514	0.95514
GO:0045879	negative regulation of smoothened signaling pathway	20	1	2.87	2561	0.95514	0.95514
GO:0006396	RNA processing	524	25	75.24	3091	1	0.95533
GO:0018205	peptidyl-lysine modification	133	6	19.1	2978	0.99995	0.95676
GO:0007293	germarium-derived egg chamber formation	89	4	12.78	2929	0.99936	0.95683
GO:0033365	protein localization to organelle	169	8	24.27	3002	0.99999	0.95721
GO:0000209	protein polyubiquitination	63	5	9.05	2580	0.95903	0.95903
GO:1901362	organic cyclic compound biosynthetic process	1183	139	169.86	2893	0.99812	0.95988
GO:0051604	protein maturation	80	13	11.49	1159	0.36017	0.96114
GO:0007266	Rho protein signal transduction	51	8	7.32	1287	0.4529	0.96125
GO:0034976	response to endoplasmic reticulum stress	71	5	10.19	2710	0.9818	0.96148
GO:0010507	negative regulation of autophagy	21	1	3.02	2589	0.9616	0.9616
GO:0045451	pole plasm oskar mRNA localization	46	4	6.6	2396	0.91312	0.96168
GO:0034968	histone lysine methylation	43	3	6.17	2579	0.9576	0.96175
GO:0016050	vesicle organization	108	11	15.51	2430	0.92232	0.96193
GO:0007264	small GTPase mediated signal transduction	212	16	30.44	2922	0.99931	0.96322
GO:0000381	regulation of alternative mRNA splicing, via spliceosome	74	6	10.63	2605	0.96478	0.96478
GO:0007291	sperm individualization	34	2	4.88	2610	0.96582	0.96582
GO:0006997	nucleus organization	54	4	7.75	2597	0.96177	0.96596
GO:0000041	transition metal ion transport	29	3	4.16	2087	0.80768	0.96702
GO:0070868	heterochromatin organization involved in chromatin silencing	22	1	3.16	2621	0.96713	0.96713
GO:0008356	asymmetric cell division	94	7	13.5	2748	0.98702	0.96764
GO:0006355	regulation of transcription, DNA-templated	872	113	125.2	2379	0.90565	0.96801
GO:0006661	phosphatidylinositol biosynthetic process	35	2	5.03	2640	0.97001	0.97001
GO:0035167	larval lymph gland hemopoiesis	36	5	5.17	1542	0.60456	0.97164
GO:0007062	sister chromatid cohesion	23	1	3.3	2646	0.97186	0.97186
GO:1901215	negative regulation of neuron death	23	1	3.3	2647	0.97186	0.97186
GO:0018130	heterocycle biosynthetic process	1147	131	164.69	2925	0.99933	0.9755
GO:0000470	maturation of LSU-rRNA	24	1	3.45	2668	0.97592	0.97592
GO:0005977	glycogen metabolic process	24	1	3.45	2669	0.97592	0.97592
GO:0043966	histone H3 acetylation	24	1	3.45	2670	0.97592	0.97592
GO:1902115	regulation of organelle assembly	24	1	3.45	2671	0.97592	0.97592
GO:0030866	cortical actin cytoskeleton organization	51	2	7.32	2858	0.99655	0.97618
GO:0043066	negative regulation of apoptotic process	89	8	12.78	2555	0.95334	0.97808
GO:0051726	regulation of cell cycle	268	22	38.48	2926	0.99935	0.97848
GO:0018193	peptidyl-amino acid modification	282	19	40.49	3000	0.99998	0.98095
GO:0009306	protein secretion	66	6	9.48	2445	0.92726	0.98233
GO:0031935	regulation of chromatin silencing	40	2	5.74	2729	0.98455	0.98455
GO:0030307	positive regulation of cell growth	40	4	5.74	2220	0.84609	0.98482
GO:0006906	vesicle fusion	60	6	8.61	2305	0.87932	0.98488
GO:0000422	autophagy of mitochondrion	27	1	3.88	2731	0.9849	0.9849
GO:0007131	reciprocal meiotic recombination	27	1	3.88	2732	0.9849	0.9849
GO:0030071	regulation of mitotic metaphase/anaphase transition	27	1	3.88	2733	0.9849	0.9849
GO:0031396	regulation of protein ubiquitination	27	1	3.88	2734	0.9849	0.9849
GO:0032456	endocytic recycling	27	1	3.88	2735	0.9849	0.9849
GO:0034605	cellular response to heat	27	1	3.88	2736	0.9849	0.9849
GO:0007306	eggshell chorion assembly	71	7	10.19	2350	0.90097	0.98492
GO:0032482	Rab protein signal transduction	39	2	5.6	2714	0.98234	0.98495
GO:0045893	positive regulation of transcription, DNA-templated	313	54	44.94	647	0.08158	0.98507
GO:0061982	meiosis I cell cycle process	86	3	12.35	2951	0.99982	0.98532
GO:0007005	mitochondrion organization	160	8	22.97	2993	0.99997	0.98569
GO:0046579	positive regulation of Ras protein signal transduction	57	3	8.18	2803	0.99211	0.98659
GO:0006414	translational elongation	28	1	4.02	2749	0.98707	0.98707
GO:0007112	male meiosis cytokinesis	28	1	4.02	2750	0.98707	0.98707
GO:0007294	germarium-derived oocyte fate determination	28	1	4.02	2751	0.98707	0.98707
GO:0048134	germ-line cyst formation	28	1	4.02	2752	0.98707	0.98707
GO:0007349	cellularization	81	5	11.63	2820	0.99378	0.98729
GO:0006511	ubiquitin-dependent protein catabolic process	203	12	29.15	2991	0.99996	0.98749
GO:0006612	protein targeting to membrane	29	1	4.16	2763	0.98894	0.98894
GO:0006626	protein targeting to mitochondrion	29	1	4.16	2764	0.98894	0.98894
GO:0043087	regulation of GTPase activity	86	5	12.35	2857	0.99644	0.98915
GO:0006366	transcription by RNA polymerase II	566	87	81.27	984	0.25455	0.99009
GO:0006464	cellular protein modification process	1011	86	145.16	3068	1	0.99037
GO:0007030	Golgi organization	77	5	11.06	2779	0.99038	0.99038
GO:0000212	meiotic spindle organization	30	1	4.31	2780	0.99053	0.99053
GO:0070925	organelle assembly	269	23	38.62	2908	0.99879	0.9911
GO:0007283	spermatogenesis	153	10	21.97	2919	0.99927	0.9914
GO:0006897	endocytosis	181	22	25.99	2171	0.83205	0.99399
GO:0000045	autophagosome assembly	33	1	4.74	2825	0.99407	0.99407
GO:0045088	regulation of innate immune response	81	8	11.63	2394	0.91171	0.99492
GO:0000077	DNA damage checkpoint	34	1	4.88	2831	0.99492	0.99492
GO:0030838	positive regulation of actin filament polymerization	34	1	4.88	2832	0.99492	0.99492
GO:0031401	positive regulation of protein modification process	166	16	23.83	2662	0.97403	0.99503
GO:0048193	Golgi vesicle transport	118	4	16.94	3001	0.99998	0.99517
GO:0032386	regulation of intracellular transport	47	2	6.75	2822	0.99402	0.99567
GO:0010639	negative regulation of organelle organization	80	6	11.49	2706	0.98021	0.99656
GO:0017144	drug metabolic process	275	44	39.48	955	0.23775	0.99712
GO:0016482	cytosolic transport	53	2	7.61	2872	0.99739	0.9973
GO:0006497	protein lipidation	54	2	7.75	2879	0.99773	0.9973
GO:0016570	histone modification	172	5	24.7	3034	1	0.99752
GO:0000281	mitotic cytokinesis	54	2	7.75	2880	0.99773	0.99773
GO:0030951	establishment or maintenance of microtubule cytoskeleton polarity	40	1	5.74	2885	0.99801	0.99801
GO:0002181	cytoplasmic translation	103	6	14.79	2895	0.99822	0.99822
GO:0009267	cellular response to starvation	59	2	8.47	2909	0.99887	0.99887
GO:0016197	endosomal transport	87	3	12.49	2954	0.99984	0.99905
GO:0006357	regulation of transcription by RNA polymerase II	530	86	76.1	719	0.11431	0.99936
GO:0022618	ribonucleoprotein complex assembly	120	9	17.23	2816	0.99316	0.99944
GO:0051276	chromosome organization	503	16	72.22	3100	1	0.99948
GO:0042274	ribosomal small subunit biogenesis	63	3	9.05	2855	0.99629	0.99951
GO:0043161	proteasome-mediated ubiquitin-dependent protein catabolic process	159	10	22.83	2936	0.9996	0.99956
GO:0009108	coenzyme biosynthetic process	73	3	10.48	2912	0.99898	0.99959
GO:0007052	mitotic spindle organization	68	2	9.76	2938	0.99969	0.99969
GO:0010638	positive regulation of organelle organization	125	4	17.95	3010	0.99999	0.99975
GO:0000278	mitotic cell cycle	419	22	60.16	3072	1	0.99977
GO:1901137	carbohydrate derivative biosynthetic process	238	17	34.17	2956	0.99984	0.99985
GO:0065004	protein-DNA complex assembly	58	1	8.33	2961	0.99988	0.99988
GO:0006888	ER to Golgi vesicle-mediated transport	60	1	8.61	2969	0.99991	0.99991
GO:0051225	spindle assembly	61	1	8.76	2973	0.99992	0.99992
GO:0006457	protein folding	112	4	16.08	2994	0.99997	0.99993
GO:0006364	rRNA processing	132	4	18.95	3017	1	0.99998
GO:0050658	RNA transport	95	6	13.64	2846	0.99576	0.99999
GO:0006281	DNA repair	155	5	22.26	3024	1	1
GO:0006886	intracellular protein transport	310	12	44.51	3076	1	1
GO:0000398	mRNA splicing, via spliceosome	226	9	32.45	3037	1	1
GO:0000002	mitochondrial genome maintenance	10	1	1.44	2042	0.78796	1
GO:0000003	reproduction	994	147	142.72	1151	0.35379	1
GO:0000038	very long-chain fatty acid metabolic process	19	5	2.73	732	0.1254	1
GO:0000070	mitotic sister chromatid segregation	96	3	13.78	2985	0.99995	1
GO:0000075	cell cycle checkpoint	58	1	8.33	2962	0.99988	1
GO:0000076	DNA replication checkpoint	14	1	2.01	2325	0.88605	1
GO:0000082	G1/S transition of mitotic cell cycle	34	3	4.88	2312	0.88498	1
GO:0000096	sulfur amino acid metabolic process	19	2	2.73	2003	0.7802	1
GO:0000097	sulfur amino acid biosynthetic process	10	1	1.44	2043	0.78796	1
GO:0000165	MAPK cascade	149	19	21.39	1915	0.74804	1
GO:0000266	mitochondrial fission	12	1	1.72	2202	0.84456	1
GO:0000270	peptidoglycan metabolic process	9	1	1.29	1940	0.75236	1
GO:0000271	polysaccharide biosynthetic process	16	1	2.3	2416	0.91648	1
GO:0000280	nuclear division	262	10	37.62	3058	1	1
GO:0000288	nuclear-transcribed mRNA catabolic process, deadenylation-dependent decay	27	2	3.88	2404	0.91625	1
GO:0000289	nuclear-transcribed mRNA poly(A) tail shortening	13	1	1.87	2262	0.86691	1
GO:0000291	nuclear-transcribed mRNA catabolic process, exonucleolytic	10	1	1.44	2044	0.78796	1
GO:0000375	RNA splicing, via transesterification reactions	226	9	32.45	3038	1	1
GO:0000377	RNA splicing, via transesterification reactions with bulged adenosine as nucleophile	226	9	32.45	3039	1	1
GO:0000380	alternative mRNA splicing, via spliceosome	74	6	10.63	2606	0.96478	1
GO:0000459	exonucleolytic trimming involved in rRNA processing	5	1	0.72	1470	0.53939	1
GO:0000460	maturation of 5.8S rRNA	24	1	3.45	2672	0.97592	1
GO:0000466	maturation of 5.8S rRNA from tricistronic rRNA transcript (SSU-rRNA, 5.8S rRNA, LSU-rRNA)	13	1	1.87	2263	0.86691	1
GO:0000469	cleavage involved in rRNA processing	19	1	2.73	2529	0.9476	1
GO:0000578	embryonic axis specification	119	16	17.09	1657	0.65259	1
GO:0000724	double-strand break repair via homologous recombination	38	1	5.46	2868	0.99728	1
GO:0000725	recombinational repair	38	1	5.46	2869	0.99728	1
GO:0000737	DNA catabolic process, endonucleolytic	11	1	1.58	2118	0.81845	1
GO:0000768	syncytium formation by plasma membrane fusion	44	6	6.32	1632	0.62008	1
GO:0000819	sister chromatid segregation	109	3	15.65	3009	0.99999	1
GO:0000904	cell morphogenesis involved in differentiation	386	98	55.42	25	3e-09	1
GO:0000910	cytokinesis	94	3	13.5	2976	0.99994	1
GO:0000912	assembly of actomyosin apparatus involved in cytokinesis	20	1	2.87	2562	0.95514	1
GO:0000956	nuclear-transcribed mRNA catabolic process	54	2	7.75	2881	0.99773	1
GO:0000959	mitochondrial RNA metabolic process	21	2	3.02	2145	0.82598	1
GO:0001101	response to acid chemical	15	2	2.15	1660	0.65657	1
GO:0001505	regulation of neurotransmitter levels	110	19	15.79	948	0.22488	1
GO:0001558	regulation of cell growth	68	8	9.76	2001	0.77955	1
GO:0001573	ganglioside metabolic process	5	2	0.72	809	0.15303	1
GO:0001655	urogenital system development	59	23	8.47	74	2.6e-06	1
GO:0001667	ameboidal-type cell migration	160	32	22.97	476	0.02982	1
GO:0001703	gastrulation with mouth forming first	29	3	4.16	2088	0.80768	1
GO:0001704	formation of primary germ layer	24	10	3.45	205	0.00103	1
GO:0001738	morphogenesis of a polarized epithelium	100	28	14.36	157	0.00027	1
GO:0001754	eye photoreceptor cell differentiation	145	36	20.82	176	0.00053	1
GO:0001775	cell activation	11	1	1.58	2119	0.81845	1
GO:0001885	endothelial cell development	9	1	1.29	1941	0.75236	1
GO:0001932	regulation of protein phosphorylation	213	24	30.58	2431	0.92363	1
GO:0001933	negative regulation of protein phosphorylation	62	7	8.9	2080	0.80625	1
GO:0001934	positive regulation of protein phosphorylation	132	15	18.95	2281	0.86961	1
GO:0001941	postsynaptic membrane organization	13	3	1.87	1044	0.28371	1
GO:0002064	epithelial cell development	311	50	44.65	939	0.2097	1
GO:0002066	columnar/cuboidal epithelial cell development	283	46	40.63	888	0.19846	1
GO:0002097	tRNA wobble base modification	13	1	1.87	2264	0.86691	1
GO:0002164	larval development	130	24	18.67	718	0.11337	1
GO:0002225	positive regulation of antimicrobial peptide production	25	3	3.59	1853	0.71769	1
GO:0002251	organ or tissue specific immune response	13	3	1.87	1045	0.28371	1
GO:0002252	immune effector process	107	12	15.36	2235	0.85993	1
GO:0002253	activation of immune response	17	4	2.44	946	0.21967	1
GO:0002440	production of molecular mediator of immune response	42	4	6.03	2289	0.87219	1
GO:0002520	immune system development	82	10	11.77	1976	0.7586	1
GO:0002682	regulation of immune system process	187	24	26.85	1975	0.75665	1
GO:0002683	negative regulation of immune system process	52	4	7.47	2548	0.9528	1
GO:0002697	regulation of immune effector process	52	5	7.47	2315	0.88552	1
GO:0002699	positive regulation of immune effector process	25	3	3.59	1854	0.71769	1
GO:0002700	regulation of production of molecular mediator of immune response	40	3	5.74	2506	0.94034	1
GO:0002702	positive regulation of production of molecular mediator of immune response	25	3	3.59	1855	0.71769	1
GO:0002757	immune response-activating signal transduction	13	3	1.87	1046	0.28371	1
GO:0002759	regulation of antimicrobial humoral response	44	3	6.32	2600	0.96223	1
GO:0002760	positive regulation of antimicrobial humoral response	25	3	3.59	1856	0.71769	1
GO:0002764	immune response-regulating signaling pathway	16	3	2.3	1227	0.40917	1
GO:0002777	antimicrobial peptide biosynthetic process	31	3	4.45	2175	0.84278	1
GO:0002778	antibacterial peptide production	18	2	2.58	1963	0.75357	1
GO:0002780	antibacterial peptide biosynthetic process	18	2	2.58	1964	0.75357	1
GO:0002781	antifungal peptide production	10	1	1.44	2045	0.78796	1
GO:0002783	antifungal peptide biosynthetic process	7	1	1.01	1718	0.66225	1
GO:0002784	regulation of antimicrobial peptide production	39	3	5.6	2471	0.93328	1
GO:0002786	regulation of antibacterial peptide production	18	2	2.58	1965	0.75357	1
GO:0002788	regulation of antifungal peptide production	10	1	1.44	2046	0.78796	1
GO:0002790	peptide secretion	72	8	10.34	2164	0.83067	1
GO:0002791	regulation of peptide secretion	25	6	3.59	762	0.13839	1
GO:0002803	positive regulation of antibacterial peptide production	15	2	2.15	1661	0.65657	1
GO:0002804	positive regulation of antifungal peptide production	10	1	1.44	2047	0.78796	1
GO:0002805	regulation of antimicrobial peptide biosynthetic process	31	3	4.45	2176	0.84278	1
GO:0002808	regulation of antibacterial peptide biosynthetic process	18	2	2.58	1966	0.75357	1
GO:0002810	regulation of antifungal peptide biosynthetic process	7	1	1.01	1719	0.66225	1
GO:0002812	biosynthetic process of antibacterial peptides active against Gram-negative bacteria	13	2	1.87	1512	0.57629	1
GO:0002813	regulation of biosynthetic process of antibacterial peptides active against Gram-negative bacteria	13	2	1.87	1513	0.57629	1
GO:0002831	regulation of response to biotic stimulus	64	6	9.19	2398	0.91355	1
GO:0002833	positive regulation of response to biotic stimulus	28	4	4.02	1527	0.58631	1
GO:0002920	regulation of humoral immune response	45	3	6.46	2615	0.96637	1
GO:0002922	positive regulation of humoral immune response	25	3	3.59	1857	0.71769	1
GO:0003002	regionalization	372	76	53.41	186	0.00066	1
GO:0003006	developmental process involved in reproduction	699	101	100.36	1339	0.48947	1
GO:0003008	system process	450	123	64.61	2	8.4e-14	1
GO:0003013	circulatory system process	38	10	5.46	505	0.03778	1
GO:0003156	regulation of animal organ formation	9	3	1.29	741	0.12729	1
GO:0003158	endothelium development	9	1	1.29	1942	0.75236	1
GO:0003381	epithelial cell morphogenesis involved in gastrulation	10	1	1.44	2048	0.78796	1
GO:0005976	polysaccharide metabolic process	35	2	5.03	2641	0.97001	1
GO:0005996	monosaccharide metabolic process	49	5	7.04	2225	0.85173	1
GO:0006006	glucose metabolic process	29	2	4.16	2481	0.93491	1
GO:0006022	aminoglycan metabolic process	82	21	11.77	289	0.00492	1
GO:0006023	aminoglycan biosynthetic process	19	2	2.73	2004	0.7802	1
GO:0006024	glycosaminoglycan biosynthetic process	11	1	1.58	2120	0.81845	1
GO:0006026	aminoglycan catabolic process	29	9	4.16	403	0.01692	1
GO:0006027	glycosaminoglycan catabolic process	9	1	1.29	1943	0.75236	1
GO:0006029	proteoglycan metabolic process	18	1	2.58	2494	0.93879	1
GO:0006040	amino sugar metabolic process	67	21	9.62	162	0.00029	1
GO:0006073	cellular glucan metabolic process	24	1	3.45	2673	0.97592	1
GO:0006101	citrate metabolic process	32	3	4.59	2229	0.85815	1
GO:0006109	regulation of carbohydrate metabolic process	21	3	3.02	1537	0.59813	1
GO:0006112	energy reserve metabolic process	24	1	3.45	2674	0.97592	1
GO:0006119	oxidative phosphorylation	63	7	9.05	2135	0.81941	1
GO:0006139	nucleobase-containing compound metabolic process	1946	171	279.41	3101	1	1
GO:0006140	regulation of nucleotide metabolic process	13	2	1.87	1514	0.57629	1
GO:0006163	purine nucleotide metabolic process	152	15	21.82	2599	0.96207	1
GO:0006164	purine nucleotide biosynthetic process	75	6	10.77	2632	0.96795	1
GO:0006165	nucleoside diphosphate phosphorylation	21	2	3.02	2146	0.82598	1
GO:0006206	pyrimidine nucleobase metabolic process	13	1	1.87	2265	0.86691	1
GO:0006259	DNA metabolic process	283	12	40.63	3057	1	1
GO:0006261	DNA-dependent DNA replication	82	4	11.77	2904	0.99848	1
GO:0006275	regulation of DNA replication	27	2	3.88	2405	0.91625	1
GO:0006304	DNA modification	8	1	1.15	1831	0.71079	1
GO:0006310	DNA recombination	74	1	10.63	3006	0.99999	1
GO:0006323	DNA packaging	86	3	12.35	2952	0.99982	1
GO:0006325	chromatin organization	327	10	46.95	3089	1	1
GO:0006333	chromatin assembly or disassembly	47	1	6.75	2923	0.99933	1
GO:0006338	chromatin remodeling	102	2	14.65	3018	1	1
GO:0006342	chromatin silencing	99	3	14.21	2995	0.99997	1
GO:0006354	DNA-templated transcription, elongation	34	1	4.88	2833	0.99492	1
GO:0006368	transcription elongation from RNA polymerase II promoter	30	1	4.31	2781	0.99053	1
GO:0006399	tRNA metabolic process	120	6	17.23	2944	0.99974	1
GO:0006401	RNA catabolic process	83	3	11.92	2942	0.99973	1
GO:0006402	mRNA catabolic process	70	3	10.05	2905	0.99849	1
GO:0006412	translation	396	21	56.86	3061	1	1
GO:0006413	translational initiation	54	2	7.75	2882	0.99773	1
GO:0006418	tRNA aminoacylation for protein translation	40	1	5.74	2886	0.99801	1
GO:0006473	protein acetylation	79	2	11.34	2975	0.99994	1
GO:0006475	internal protein amino acid acetylation	75	2	10.77	2965	0.99988	1
GO:0006479	protein methylation	69	4	9.91	2809	0.99282	1
GO:0006486	protein glycosylation	80	7	11.49	2551	0.95309	1
GO:0006493	protein O-linked glycosylation	35	4	5.03	1984	0.76084	1
GO:0006534	cysteine metabolic process	9	1	1.29	1944	0.75236	1
GO:0006555	methionine metabolic process	16	2	2.3	1781	0.69191	1
GO:0006582	melanin metabolic process	49	6	7.04	1895	0.72464	1
GO:0006605	protein targeting	84	5	12.06	2843	0.99555	1
GO:0006606	protein import into nucleus	57	1	8.18	2958	0.99986	1
GO:0006625	protein targeting to peroxisome	7	1	1.01	1720	0.66225	1
GO:0006631	fatty acid metabolic process	91	14	13.07	1271	0.43451	1
GO:0006635	fatty acid beta-oxidation	32	1	4.59	2812	0.99307	1
GO:0006637	acyl-CoA metabolic process	34	6	4.88	1162	0.36116	1
GO:0006638	neutral lipid metabolic process	31	4	4.45	1749	0.66924	1
GO:0006639	acylglycerol metabolic process	31	4	4.45	1750	0.66924	1
GO:0006643	membrane lipid metabolic process	89	11	12.78	1917	0.74988	1
GO:0006664	glycolipid metabolic process	50	2	7.18	2848	0.99604	1
GO:0006672	ceramide metabolic process	20	4	2.87	1081	0.32116	1
GO:0006687	glycosphingolipid metabolic process	17	2	2.44	1879	0.7242	1
GO:0006694	steroid biosynthetic process	30	5	4.31	1273	0.43549	1
GO:0006720	isoprenoid metabolic process	22	2	3.16	2217	0.84549	1
GO:0006725	cellular aromatic compound metabolic process	2055	185	295.06	3102	1	1
GO:0006732	coenzyme metabolic process	120	10	17.23	2727	0.98431	1
GO:0006733	oxidoreduction coenzyme metabolic process	45	2	6.46	2805	0.99214	1
GO:0006753	nucleoside phosphate metabolic process	197	18	28.29	2776	0.99023	1
GO:0006754	ATP biosynthetic process	38	4	5.46	2098	0.81562	1
GO:0006757	ATP generation from ADP	17	2	2.44	1880	0.7242	1
GO:0006793	phosphorus metabolic process	857	109	123.05	2484	0.93594	1
GO:0006865	amino acid transport	39	6	5.6	1354	0.49618	1
GO:0006875	cellular metal ion homeostasis	69	12	9.91	1035	0.28187	1
GO:0006885	regulation of pH	33	5	4.74	1368	0.52326	1
GO:0006892	post-Golgi vesicle-mediated transport	27	2	3.88	2406	0.91625	1
GO:0006893	Golgi to plasma membrane transport	14	1	2.01	2326	0.88605	1
GO:0006904	vesicle docking involved in exocytosis	25	1	3.59	2699	0.97939	1
GO:0006911	phagocytosis, engulfment	12	1	1.72	2203	0.84456	1
GO:0006913	nucleocytoplasmic transport	109	1	15.65	3041	1	1
GO:0006921	cellular component disassembly involved in execution phase of apoptosis	9	1	1.29	1945	0.75236	1
GO:0006928	movement of cell or subcellular component	532	117	76.39	52	5.3e-07	1
GO:0006935	chemotaxis	233	70	33.45	13	3.2e-10	1
GO:0006949	syncytium formation	44	6	6.32	1633	0.62008	1
GO:0006963	positive regulation of antibacterial peptide biosynthetic process	15	2	2.15	1662	0.65657	1
GO:0006970	response to osmotic stress	9	1	1.29	1946	0.75236	1
GO:0006974	cellular response to DNA damage stimulus	191	6	27.42	3044	1	1
GO:0006986	response to unfolded protein	29	3	4.16	2089	0.80768	1
GO:0007006	mitochondrial membrane organization	23	1	3.3	2648	0.97186	1
GO:0007017	microtubule-based process	322	25	46.23	2974	0.99993	1
GO:0007019	microtubule depolymerization	17	2	2.44	1881	0.7242	1
GO:0007028	cytoplasm organization	68	4	9.76	2802	0.99194	1
GO:0007033	vacuole organization	50	1	7.18	2934	0.99958	1
GO:0007034	vacuolar transport	42	3	6.03	2544	0.95245	1
GO:0007049	cell cycle	646	36	92.75	3092	1	1
GO:0007051	spindle organization	108	3	15.51	3007	0.99999	1
GO:0007093	mitotic cell cycle checkpoint	42	1	6.03	2907	0.99854	1
GO:0007098	centrosome cycle	65	3	9.33	2865	0.99712	1
GO:0007100	mitotic centrosome separation	12	1	1.72	2204	0.84456	1
GO:0007127	meiosis I	50	1	7.18	2935	0.99958	1
GO:0007140	male meiotic nuclear division	57	1	8.18	2959	0.99986	1
GO:0007143	female meiotic nuclear division	62	2	8.9	2917	0.99926	1
GO:0007154	cell communication	1452	252	208.48	143	0.00021	1
GO:0007164	establishment of tissue polarity	88	27	12.64	124	6.4e-05	1
GO:0007178	transmembrane receptor protein serine/threonine kinase signaling pathway	62	13	8.9	691	0.09922	1
GO:0007187	G-protein coupled receptor signaling pathway, coupled to cyclic nucleotide second messenger	33	6	4.74	1141	0.33399	1
GO:0007188	adenylate cyclase-modulating G-protein coupled receptor signaling pathway	31	6	4.45	1034	0.28057	1
GO:0007259	JAK-STAT cascade	37	2	5.31	2695	0.97696	1
GO:0007265	Ras protein signal transduction	185	15	26.56	2861	0.99688	1
GO:0007272	ensheathment of neurons	12	1	1.72	2205	0.84456	1
GO:0007276	gamete generation	759	87	108.98	2824	0.99407	1
GO:0007277	pole cell development	28	2	4.02	2439	0.92614	1
GO:0007292	female gamete generation	608	72	87.3	2661	0.974	1
GO:0007300	ovarian nurse cell to oocyte transport	29	1	4.16	2765	0.98894	1
GO:0007308	oocyte construction	121	13	17.37	2369	0.90274	1
GO:0007309	oocyte axis specification	118	13	16.94	2307	0.88312	1
GO:0007315	pole plasm assembly	61	4	8.76	2712	0.98216	1
GO:0007316	pole plasm RNA localization	50	4	7.18	2509	0.94193	1
GO:0007320	insemination	5	2	0.72	810	0.15303	1
GO:0007338	single fertilization	27	1	3.88	2737	0.9849	1
GO:0007351	tripartite regional subdivision	114	16	16.37	1524	0.58075	1
GO:0007389	pattern specification process	403	79	57.86	228	0.00181	1
GO:0007392	initiation of dorsal closure	16	3	2.3	1228	0.40917	1
GO:0007442	hindgut morphogenesis	46	14	6.6	269	0.00393	1
GO:0007445	determination of imaginal disc primordium	9	5	1.29	285	0.00461	1
GO:0007447	imaginal disc pattern formation	83	25	11.92	137	0.00016	1
GO:0007448	anterior/posterior pattern specification, imaginal disc	16	6	2.3	425	0.01912	1
GO:0007484	imaginal disc-derived genitalia development	20	7	2.87	405	0.01737	1
GO:0007492	endoderm development	6	1	0.86	1591	0.60557	1
GO:0007538	primary sex determination	11	1	1.58	2121	0.81845	1
GO:0007542	primary sex determination, germ-line	5	1	0.72	1471	0.53939	1
GO:0007549	dosage compensation	17	2	2.44	1882	0.7242	1
GO:0007560	imaginal disc morphogenesis	312	66	44.8	179	0.00056	1
GO:0007562	eclosion	16	2	2.3	1782	0.69191	1
GO:0007564	regulation of chitin-based cuticle tanning	10	1	1.44	2049	0.78796	1
GO:0007568	aging	140	17	20.1	2093	0.80794	1
GO:0007593	chitin-based cuticle sclerotization	29	7	4.16	716	0.11149	1
GO:0007600	sensory perception	206	66	29.58	7	4.8e-11	1
GO:0007617	mating behavior	71	20	10.19	227	0.0018	1
GO:0007618	mating	75	21	10.77	224	0.00152	1
GO:0008033	tRNA processing	71	4	10.19	2829	0.99432	1
GO:0008037	cell recognition	87	34	12.49	32	1e-08	1
GO:0008053	mitochondrial fusion	8	1	1.15	1832	0.71079	1
GO:0008055	ocellus pigment biosynthetic process	15	3	2.15	1167	0.36769	1
GO:0008064	regulation of actin polymerization or depolymerization	56	4	8.04	2634	0.96913	1
GO:0008078	mesodermal cell migration	15	5	2.15	563	0.05237	1
GO:0008088	axo-dendritic transport	34	4	4.88	1901	0.73998	1
GO:0008150	biological_process	7299	1048	1048	3103	1	1
GO:0008154	actin polymerization or depolymerization	64	5	9.19	2602	0.96288	1
GO:0008156	negative regulation of DNA replication	13	1	1.87	2266	0.86691	1
GO:0008202	steroid metabolic process	43	9	6.17	815	0.15456	1
GO:0008205	ecdysone metabolic process	12	4	1.72	643	0.08075	1
GO:0008213	protein alkylation	69	4	9.91	2810	0.99282	1
GO:0008219	cell death	318	42	45.66	1916	0.74869	1
GO:0008272	sulfate transport	10	2	1.44	1262	0.43196	1
GO:0008277	regulation of G-protein coupled receptor protein signaling pathway	21	4	3.02	1156	0.35596	1
GO:0008358	maternal determination of anterior/posterior axis, embryo	84	7	12.06	2619	0.96704	1
GO:0008363	larval chitin-based cuticle development	22	5	3.16	889	0.19949	1
GO:0008544	epidermis development	50	6	7.18	1911	0.74293	1
GO:0008589	regulation of smoothened signaling pathway	34	2	4.88	2611	0.96582	1
GO:0008592	regulation of Toll signaling pathway	21	1	3.02	2590	0.9616	1
GO:0008610	lipid biosynthetic process	167	21	23.98	1998	0.77826	1
GO:0008643	carbohydrate transport	20	5	2.87	776	0.14852	1
GO:0008652	cellular amino acid biosynthetic process	41	7	5.89	1175	0.37361	1
GO:0008654	phospholipid biosynthetic process	68	2	9.76	2939	0.99969	1
GO:0009057	macromolecule catabolic process	399	30	57.29	3011	0.99999	1
GO:0009059	macromolecule biosynthetic process	1569	151	225.28	3077	1	1
GO:0009060	aerobic respiration	43	5	6.17	1978	0.75951	1
GO:0009063	cellular amino acid catabolic process	39	3	5.6	2472	0.93328	1
GO:0009064	glutamine family amino acid metabolic process	28	5	4.02	1178	0.375	1
GO:0009066	aspartate family amino acid metabolic process	28	2	4.02	2440	0.92614	1
GO:0009067	aspartate family amino acid biosynthetic process	13	1	1.87	2267	0.86691	1
GO:0009069	serine family amino acid metabolic process	22	1	3.16	2622	0.96713	1
GO:0009081	branched-chain amino acid metabolic process	8	2	1.15	1111	0.32247	1
GO:0009100	glycoprotein metabolic process	119	14	17.09	2162	0.82712	1
GO:0009101	glycoprotein biosynthetic process	95	8	13.64	2655	0.97198	1
GO:0009112	nucleobase metabolic process	26	1	3.73	2718	0.98236	1
GO:0009117	nucleotide metabolic process	195	18	28	2762	0.98872	1
GO:0009119	ribonucleoside metabolic process	31	1	4.45	2799	0.9919	1
GO:0009123	nucleoside monophosphate metabolic process	123	11	17.66	2664	0.97442	1
GO:0009124	nucleoside monophosphate biosynthetic process	54	4	7.75	2598	0.96177	1
GO:0009126	purine nucleoside monophosphate metabolic process	113	11	16.22	2524	0.94547	1
GO:0009127	purine nucleoside monophosphate biosynthetic process	45	4	6.46	2371	0.90416	1
GO:0009132	nucleoside diphosphate metabolic process	23	2	3.3	2246	0.86299	1
GO:0009135	purine nucleoside diphosphate metabolic process	18	2	2.58	1967	0.75357	1
GO:0009141	nucleoside triphosphate metabolic process	115	11	16.51	2549	0.95289	1
GO:0009142	nucleoside triphosphate biosynthetic process	43	4	6.17	2308	0.88375	1
GO:0009144	purine nucleoside triphosphate metabolic process	112	11	16.08	2507	0.94139	1
GO:0009145	purine nucleoside triphosphate biosynthetic process	42	4	6.03	2290	0.87219	1
GO:0009150	purine ribonucleotide metabolic process	149	15	21.39	2556	0.95366	1
GO:0009152	purine ribonucleotide biosynthetic process	73	6	10.48	2588	0.96133	1
GO:0009156	ribonucleoside monophosphate biosynthetic process	50	4	7.18	2510	0.94193	1
GO:0009161	ribonucleoside monophosphate metabolic process	119	11	17.09	2608	0.96511	1
GO:0009164	nucleoside catabolic process	11	1	1.58	2122	0.81845	1
GO:0009165	nucleotide biosynthetic process	98	6	14.07	2862	0.99693	1
GO:0009167	purine ribonucleoside monophosphate metabolic process	113	11	16.22	2525	0.94547	1
GO:0009168	purine ribonucleoside monophosphate biosynthetic process	45	4	6.46	2372	0.90416	1
GO:0009179	purine ribonucleoside diphosphate metabolic process	18	2	2.58	1968	0.75357	1
GO:0009185	ribonucleoside diphosphate metabolic process	18	2	2.58	1969	0.75357	1
GO:0009187	cyclic nucleotide metabolic process	22	4	3.16	1211	0.39073	1
GO:0009190	cyclic nucleotide biosynthetic process	17	2	2.44	1883	0.7242	1
GO:0009199	ribonucleoside triphosphate metabolic process	111	11	15.94	2487	0.93704	1
GO:0009201	ribonucleoside triphosphate biosynthetic process	42	4	6.03	2291	0.87219	1
GO:0009205	purine ribonucleoside triphosphate metabolic process	111	11	15.94	2488	0.93704	1
GO:0009206	purine ribonucleoside triphosphate biosynthetic process	42	4	6.03	2292	0.87219	1
GO:0009225	nucleotide-sugar metabolic process	17	5	2.44	659	0.08475	1
GO:0009259	ribonucleotide metabolic process	154	15	22.11	2618	0.9669	1
GO:0009260	ribonucleotide biosynthetic process	78	6	11.2	2683	0.97595	1
GO:0009308	amine metabolic process	21	2	3.02	2147	0.82598	1
GO:0009309	amine biosynthetic process	7	1	1.01	1721	0.66225	1
GO:0009311	oligosaccharide metabolic process	25	2	3.59	2338	0.89266	1
GO:0009404	toxin metabolic process	10	5	1.44	335	0.00813	1
GO:0009410	response to xenobiotic stimulus	29	10	4.16	305	0.00533	1
GO:0009411	response to UV	23	4	3.3	1237	0.42522	1
GO:0009451	RNA modification	88	6	12.64	2792	0.99116	1
GO:0009453	energy taxis	20	4	2.87	1082	0.32116	1
GO:0009566	fertilization	30	1	4.31	2782	0.99053	1
GO:0009581	detection of external stimulus	71	25	10.19	84	8.4e-06	1
GO:0009582	detection of abiotic stimulus	71	25	10.19	85	8.4e-06	1
GO:0009583	detection of light stimulus	58	21	8.33	102	2.7e-05	1
GO:0009605	response to external stimulus	721	144	103.52	86	8.5e-06	1
GO:0009607	response to biotic stimulus	269	33	38.62	2238	0.86197	1
GO:0009615	response to virus	44	7	6.32	1281	0.44843	1
GO:0009629	response to gravity	19	2	2.73	2005	0.7802	1
GO:0009648	photoperiodism	10	2	1.44	1263	0.43196	1
GO:0009712	catechol-containing compound metabolic process	14	3	2.01	1132	0.32571	1
GO:0009713	catechol-containing compound biosynthetic process	5	1	0.72	1472	0.53939	1
GO:0009719	response to endogenous stimulus	184	38	26.42	370	0.01165	1
GO:0009725	response to hormone	108	20	15.51	758	0.13582	1
GO:0009743	response to carbohydrate	17	5	2.44	660	0.08475	1
GO:0009791	post-embryonic development	502	96	72.08	217	0.0014	1
GO:0009794	regulation of mitotic cell cycle, embryonic	14	1	2.01	2327	0.88605	1
GO:0009798	axis specification	176	24	25.27	1649	0.64199	1
GO:0009799	specification of symmetry	12	1	1.72	2206	0.84456	1
GO:0009826	unidimensional cell growth	21	3	3.02	1538	0.59813	1
GO:0009886	post-embryonic animal morphogenesis	369	74	52.98	215	0.00133	1
GO:0009888	tissue development	860	173	123.48	53	5.3e-07	1
GO:0009889	regulation of biosynthetic process	1065	130	152.91	2758	0.9877	1
GO:0009890	negative regulation of biosynthetic process	364	52	52.26	1485	0.54015	1
GO:0009891	positive regulation of biosynthetic process	385	61	55.28	941	0.21595	1
GO:0009892	negative regulation of metabolic process	628	78	90.17	2486	0.93628	1
GO:0009893	positive regulation of metabolic process	647	86	92.9	2081	0.80674	1
GO:0009894	regulation of catabolic process	169	13	24.27	2874	0.99749	1
GO:0009895	negative regulation of catabolic process	33	2	4.74	2583	0.96107	1
GO:0009896	positive regulation of catabolic process	78	5	11.2	2794	0.99137	1
GO:0009914	hormone transport	12	4	1.72	644	0.08075	1
GO:0009966	regulation of signal transduction	645	83	92.61	2309	0.8838	1
GO:0009987	cellular process	5560	710	798.31	3088	1	1
GO:0009991	response to extracellular stimulus	126	11	18.09	2702	0.97986	1
GO:0009994	oocyte differentiation	155	13	22.26	2797	0.99176	1
GO:0010160	formation of animal organ boundary	35	15	5.03	111	4e-05	1
GO:0010165	response to X-ray	12	1	1.72	2207	0.84456	1
[truncated: 1,861 more rows]

## Sheet: GO_age_down
GO.ID	Term	Annotated	Significant	Expected	Rank in Fisher.classic	Fisher.classic	Fisher.weight01
GO:0006270	DNA replication initiation	23	17	1.9	35	1.9e-14	1.9e-14
GO:0006281	DNA repair	155	59	12.78	13	1.7e-25	1.5e-10
GO:0007140	male meiotic nuclear division	57	17	4.7	114	1.8e-06	3.1e-09
GO:0007052	mitotic spindle organization	68	23	5.61	73	1.8e-09	5.2e-09
GO:0007076	mitotic chromosome condensation	20	12	1.65	78	6.1e-09	6.1e-09
GO:0006355	regulation of transcription, DNA-templated	872	132	71.92	39	3e-13	5.9e-07
GO:0034508	centromere complex assembly	7	6	0.58	116	2e-06	2e-06
GO:0000724	double-strand break repair via homologous recombination	38	14	3.13	108	8.7e-07	8.8e-06
GO:0016321	female meiosis chromosome segregation	29	11	2.39	134	9.6e-06	9.6e-06
GO:0006334	nucleosome assembly	22	11	1.81	99	3.3e-07	1.4e-05
GO:0006357	regulation of transcription by RNA polymerase II	530	67	43.71	186	0.00021	1.6e-05
GO:0000281	mitotic cytokinesis	54	15	4.45	141	1.9e-05	1.9e-05
GO:0032837	distributive segregation	6	5	0.49	142	2.1e-05	2.1e-05
GO:0007099	centriole replication	23	9	1.9	159	4.7e-05	4.7e-05
GO:0008156	negative regulation of DNA replication	13	7	1.07	151	2.8e-05	6.8e-05
GO:0000070	mitotic sister chromatid segregation	96	38	7.92	29	1.8e-17	6.9e-05
GO:0045931	positive regulation of mitotic cell cycle	33	9	2.72	231	0.00106	9.8e-05
GO:0006284	base-excision repair	11	6	0.91	172	9.9e-05	9.9e-05
GO:0007131	reciprocal meiotic recombination	27	11	2.23	125	4.2e-06	0.0001
GO:0030261	chromosome condensation	48	23	3.96	42	3.4e-13	0.00012
GO:0033314	mitotic DNA replication checkpoint	8	5	0.66	178	0.00017	0.00017
GO:0006298	mismatch repair	12	6	0.99	180	0.00018	0.00018
GO:0016233	telomere capping	12	6	0.99	181	0.00018	0.00018
GO:0090305	nucleic acid phosphodiester bond hydrolysis	69	10	5.69	405	0.05521	0.00019
GO:0007307	eggshell chorion gene amplification	17	7	1.4	187	0.00023	0.00023
GO:0016572	histone phosphorylation	13	6	1.07	196	0.00032	0.00032
GO:0031573	intra-S DNA damage checkpoint	9	5	0.74	203	0.00036	0.00036
GO:0007018	microtubule-based movement	88	13	7.26	370	0.02746	0.00038
GO:0006260	DNA replication	99	46	8.17	14	1.8e-24	0.00051
GO:0007348	regulation of syncytial blastoderm mitotic cell cycle	6	4	0.49	213	0.0006	0.0006
GO:0007062	sister chromatid cohesion	23	11	1.9	103	5.9e-07	0.00064
GO:0032465	regulation of cytokinesis	10	5	0.82	215	0.00067	0.00067
GO:0042766	nucleosome mobilization	10	5	0.82	216	0.00067	0.00067
GO:0045005	DNA-dependent DNA replication maintenance of fidelity	10	5	0.82	217	0.00067	0.00067
GO:0045143	homologous chromosome segregation	10	5	0.82	218	0.00067	0.00067
GO:0007113	endomitotic cell cycle	11	5	0.91	232	0.00114	0.00114
GO:0042023	DNA endoreduplication	22	7	1.81	242	0.00142	0.00119
GO:0051445	regulation of meiotic cell cycle	17	8	1.4	148	2.5e-05	0.00128
GO:0016925	protein sumoylation	7	4	0.58	237	0.00131	0.00131
GO:0019985	translesion synthesis	7	4	0.58	238	0.00131	0.00131
GO:0045835	negative regulation of meiotic nuclear division	7	4	0.58	239	0.00131	0.00131
GO:0051383	kinetochore organization	7	4	0.58	240	0.00131	0.00131
GO:0007100	mitotic centrosome separation	12	5	0.99	246	0.00182	0.00182
GO:0051306	mitotic sister chromatid separation	34	10	2.8	192	0.00029	0.00205
GO:0036297	interstrand cross-link repair	8	4	0.66	254	0.00245	0.00245
GO:0006289	nucleotide-excision repair	24	7	1.98	257	0.0025	0.0025
GO:0007080	mitotic metaphase plate congression	14	5	1.15	267	0.00401	0.00401
GO:2000134	negative regulation of G1/S transition of mitotic cell cycle	14	5	1.15	268	0.00401	0.00401
GO:0007095	mitotic G2 DNA damage checkpoint	9	4	0.74	271	0.00412	0.00412
GO:0040015	negative regulation of multicellular organism growth	9	4	0.74	272	0.00412	0.00412
GO:0051304	chromosome separation	49	17	4.04	94	1.6e-07	0.00468
GO:0009314	response to radiation	168	18	13.86	550	0.15064	0.00488
GO:0007057	spindle assembly involved in female meiosis I	5	3	0.41	276	0.00492	0.00492
GO:0009949	polarity specification of anterior/posterior axis	5	3	0.41	277	0.00492	0.00492
GO:0010032	meiotic chromosome condensation	5	3	0.41	278	0.00492	0.00492
GO:0040016	embryonic cleavage	5	3	0.41	279	0.00492	0.00492
GO:0051177	meiotic sister chromatid cohesion	5	3	0.41	280	0.00492	0.00492
GO:0006974	cellular response to DNA damage stimulus	191	69	15.75	10	4.2e-28	0.00523
GO:0007346	regulation of mitotic cell cycle	172	53	14.19	25	3.6e-18	0.00548
GO:0048132	female germ-line stem cell asymmetric division	15	5	1.24	283	0.00561	0.00561
GO:0090307	mitotic spindle assembly	28	7	2.31	289	0.00641	0.00641
GO:0008608	attachment of spindle microtubules to kinetochore	10	4	0.82	290	0.00643	0.00643
GO:0000075	cell cycle checkpoint	58	22	4.78	68	3.3e-10	0.00645
GO:1902749	regulation of cell cycle G2/M phase transition	30	12	2.47	115	1.9e-06	0.00662
GO:0006277	DNA amplification	19	9	1.57	130	7.2e-06	0.00667
GO:1901989	positive regulation of cell cycle phase transition	21	5	1.73	367	0.02516	0.00676
GO:0051231	spindle elongation	12	4	0.99	320	0.01327	0.00677
GO:0070868	heterochromatin organization involved in chromatin silencing	22	6	1.81	293	0.00728	0.00728
GO:0008356	asymmetric cell division	94	17	7.75	245	0.00155	0.00731
GO:0006261	DNA-dependent DNA replication	82	38	6.76	20	2.4e-20	0.00797
GO:0045132	meiotic chromosome segregation	63	27	5.2	36	9e-14	0.00842
GO:0043486	histone exchange	23	6	1.9	297	0.00918	0.00918
GO:0006336	DNA replication-independent nucleosome assembly	6	3	0.49	300	0.00924	0.00924
GO:0009951	polarity specification of dorsal/ventral axis	6	3	0.49	301	0.00924	0.00924
GO:0040019	positive regulation of embryonic development	6	3	0.49	302	0.00924	0.00924
GO:0051255	spindle midzone assembly	6	3	0.49	303	0.00924	0.00924
GO:0001578	microtubule bundle formation	26	8	2.14	226	0.00084	0.0093
GO:0006919	activation of cysteine-type endopeptidase activity involved in apoptotic process	11	4	0.91	305	0.00945	0.00945
GO:0035222	wing disc pattern formation	60	7	4.95	632	0.22287	0.00951
GO:0006338	chromatin remodeling	102	25	8.41	102	4.8e-07	0.0097
GO:0051276	chromosome organization	503	126	41.49	4	< 1e-30	0.01094
GO:0043966	histone H3 acetylation	24	6	1.98	314	0.01141	0.01141
GO:0007088	regulation of mitotic nuclear division	61	14	5.03	201	0.00034	0.01253
GO:0000122	negative regulation of transcription by RNA polymerase II	134	19	11.05	323	0.01347	0.01347
GO:0007056	spindle assembly involved in female meiosis	12	6	0.99	182	0.00018	0.01501
GO:0010332	response to gamma radiation	18	6	1.48	253	0.00241	0.01504
GO:0000712	resolution of meiotic recombination intermediates	7	3	0.58	325	0.01518	0.01518
GO:0006272	leading strand elongation	7	3	0.58	326	0.01518	0.01518
GO:0006348	chromatin silencing at telomere	7	3	0.58	327	0.01518	0.01518
GO:0007060	male meiosis chromosome segregation	7	3	0.58	328	0.01518	0.01518
GO:0007141	male meiosis I	7	3	0.58	329	0.01518	0.01518
GO:0007288	sperm axoneme assembly	7	3	0.58	330	0.01518	0.01518
GO:0044728	DNA methylation or demethylation	7	3	0.58	331	0.01518	0.01518
GO:0070193	synaptonemal complex organization	7	3	0.58	332	0.01518	0.01518
GO:0080009	mRNA methylation	7	3	0.58	333	0.01518	0.01518
GO:0032774	RNA biosynthetic process	936	136	77.2	50	2.9e-12	0.01539
GO:0006325	chromatin organization	327	66	26.97	48	2.7e-12	0.01591
GO:0065004	protein-DNA complex assembly	58	19	4.78	90	8.6e-08	0.01681
GO:0000077	DNA damage checkpoint	34	14	2.8	95	1.7e-07	0.01711
GO:0000723	telomere maintenance	29	11	2.39	135	9.6e-06	0.01737
GO:0006342	chromatin silencing	99	21	8.17	156	4.3e-05	0.01759
GO:0035065	regulation of histone acetylation	13	4	1.07	341	0.01794	0.01794
GO:0031445	regulation of heterochromatin assembly	11	4	0.91	306	0.00945	0.01918
GO:0030717	oocyte karyosome formation	27	6	2.23	347	0.02032	0.02032
GO:0000915	actomyosin contractile ring assembly	20	5	1.65	352	0.02053	0.02053
GO:0009794	regulation of mitotic cell cycle, embryonic	14	7	1.15	160	5.1e-05	0.02247
GO:0007064	mitotic sister chromatid cohesion	8	3	0.66	356	0.02283	0.02283
GO:0007343	egg activation	8	3	0.66	357	0.02283	0.02283
GO:0009631	cold acclimation	8	3	0.66	358	0.02283	0.02283
GO:0043484	regulation of RNA splicing	86	9	7.09	688	0.27696	0.02287
GO:0010468	regulation of gene expression	1188	158	97.98	62	4.9e-11	0.02299
GO:0007094	mitotic spindle assembly checkpoint	14	4	1.15	361	0.02351	0.02351
GO:0016360	sensory organ precursor cell fate determination	14	4	1.15	362	0.02351	0.02351
GO:0001737	establishment of imaginal disc-derived wing hair orientation	21	5	1.73	368	0.02516	0.02516
GO:0035186	syncytial blastoderm mitotic cell cycle	21	8	1.73	175	0.00016	0.02945
GO:0045893	positive regulation of transcription, DNA-templated	313	37	25.82	336	0.01562	0.03009
GO:0016458	gene silencing	165	28	13.61	179	0.00017	0.03047
GO:0051298	centrosome duplication	32	12	2.64	127	4.3e-06	0.03119
GO:0006312	mitotic recombination	9	3	0.74	378	0.03218	0.03218
GO:2000779	regulation of double-strand break repair	9	3	0.74	379	0.03218	0.03218
GO:0061982	meiosis I cell cycle process	86	29	7.09	57	1.5e-11	0.03412
GO:0044773	mitotic DNA damage checkpoint	19	10	1.57	105	6.3e-07	0.03565
GO:0007135	meiosis II	9	5	0.74	204	0.00036	0.03613
GO:0051307	meiotic chromosome separation	11	5	0.91	233	0.00114	0.03615
GO:0000018	regulation of DNA recombination	15	5	1.24	284	0.00561	0.03618
GO:0070988	demethylation	12	4	0.99	321	0.01327	0.03627
GO:0045478	fusome organization	14	3	1.15	476	0.10268	0.0364
GO:0048024	regulation of mRNA splicing, via spliceosome	78	6	6.43	1309	0.63144	0.03666
GO:0030097	hemopoiesis	72	6	5.94	1160	0.55167	0.03801
GO:0007488	histoblast morphogenesis	10	3	0.82	390	0.04321	0.04321
GO:0045737	positive regulation of cyclin-dependent protein serine/threonine kinase activity	10	3	0.82	391	0.04321	0.04321
GO:0046605	regulation of centrosome cycle	10	3	0.82	392	0.04321	0.04321
GO:0007143	female meiotic nuclear division	62	22	5.11	71	1.5e-09	0.05134
GO:0045930	negative regulation of mitotic cell cycle	62	24	5.11	59	3.1e-11	0.05441
GO:0031937	positive regulation of chromatin silencing	18	5	1.48	318	0.01301	0.05554
GO:0007110	meiosis I cytokinesis	11	3	0.91	411	0.05587	0.05587
GO:0071480	cellular response to gamma radiation	11	3	0.91	412	0.05587	0.05587
GO:0051310	metaphase plate congression	19	7	1.57	209	0.00052	0.05675
GO:0060968	regulation of gene silencing	69	10	5.69	406	0.05521	0.05695
GO:0030317	flagellated sperm motility	12	5	0.99	247	0.00182	0.057
GO:0045910	negative regulation of DNA recombination	11	3	0.91	413	0.05587	0.05734
GO:0000727	double-strand break repair via break-induced replication	5	2	0.41	417	0.05742	0.05742
GO:0009071	serine family amino acid catabolic process	5	2	0.41	418	0.05742	0.05742
GO:0009301	snRNA transcription	5	2	0.41	419	0.05742	0.05742
GO:0030702	chromatin silencing at centromere	5	2	0.41	420	0.05742	0.05742
GO:0042682	regulation of compound eye cone cell fate specification	5	2	0.41	421	0.05742	0.05742
GO:0044380	protein localization to cytoskeleton	5	2	0.41	422	0.05742	0.05742
GO:0044771	meiotic cell cycle phase transition	5	2	0.41	423	0.05742	0.05742
GO:0051418	microtubule nucleation by microtubule organizing center	5	2	0.41	424	0.05742	0.05742
GO:0060213	positive regulation of nuclear-transcribed mRNA poly(A) tail shortening	5	2	0.41	425	0.05742	0.05742
GO:0071168	protein localization to chromatin	5	2	0.41	426	0.05742	0.05742
GO:0090224	regulation of spindle organization	5	2	0.41	427	0.05742	0.05742
GO:0032502	developmental process	2185	178	180.21	1239	0.59758	0.05835
GO:0030182	neuron differentiation	601	37	49.57	2203	0.98157	0.06013
GO:0008283	cell proliferation	305	32	25.16	469	0.0917	0.06477
GO:0006506	GPI anchor biosynthetic process	27	5	2.23	433	0.06656	0.06656
GO:0000212	meiotic spindle organization	30	10	2.47	171	8.9e-05	0.06852
GO:0000082	G1/S transition of mitotic cell cycle	34	10	2.8	193	0.00029	0.06861
GO:0018107	peptidyl-threonine phosphorylation	12	3	0.99	435	0.07007	0.07007
GO:0034587	piRNA metabolic process	12	3	0.99	436	0.07007	0.07007
GO:1905515	non-motile cilium assembly	12	3	0.99	437	0.07007	0.07007
GO:0001751	compound eye photoreceptor cell differentiation	140	10	11.55	1512	0.72885	0.0711
GO:0050789	regulation of biological process	2987	294	246.36	146	2.5e-05	0.07164
GO:0044770	cell cycle phase transition	109	29	8.99	79	8e-09	0.07982
GO:0000076	DNA replication checkpoint	14	7	1.15	161	5.1e-05	0.08048
GO:0006282	regulation of DNA repair	15	5	1.24	285	0.00561	0.08097
GO:0006308	DNA catabolic process	17	4	1.4	397	0.04593	0.08125
GO:0051294	establishment of spindle orientation	22	4	1.81	474	0.10223	0.08135
GO:0051053	negative regulation of DNA metabolic process	24	10	1.98	133	9.1e-06	0.0815
GO:0016540	protein autoprocessing	6	2	0.49	448	0.08152	0.08152
GO:0030728	ovulation	6	2	0.49	449	0.08152	0.08152
GO:0042770	signal transduction in response to DNA damage	6	2	0.49	450	0.08152	0.08152
GO:0045678	positive regulation of R7 cell differentiation	6	2	0.49	451	0.08152	0.08152
GO:0048133	male germ-line stem cell asymmetric division	6	2	0.49	452	0.08152	0.08152
GO:1900087	positive regulation of G1/S transition of mitotic cell cycle	6	2	0.49	453	0.08152	0.08152
GO:2000104	negative regulation of DNA-dependent DNA replication	6	2	0.49	454	0.08152	0.08152
GO:0006401	RNA catabolic process	83	8	6.85	835	0.37698	0.0816
GO:0034504	protein localization to nucleus	63	6	5.2	918	0.41989	0.08169
GO:0033045	regulation of sister chromatid segregation	37	9	3.05	259	0.00253	0.08178
GO:2001251	negative regulation of chromosome organization	40	9	3.3	273	0.00445	0.08182
GO:0031577	spindle checkpoint	15	5	1.24	286	0.00561	0.08209
GO:0014074	response to purine-containing compound	10	3	0.82	393	0.04321	0.0823
GO:0006313	transposition, DNA-mediated	7	2	0.58	484	0.10805	0.08241
GO:0032185	septin cytoskeleton organization	8	2	0.66	520	0.13646	0.08242
GO:1901407	regulation of phosphorylation of RNA polymerase II C-terminal domain	8	2	0.66	521	0.13646	0.08242
GO:1904375	regulation of protein localization to cell periphery	8	2	0.66	522	0.13646	0.08242
GO:0048581	negative regulation of post-embryonic development	9	2	0.74	569	0.16625	0.08243
GO:0046939	nucleotide phosphorylation	22	3	1.81	681	0.27078	0.08244
GO:0051236	establishment of RNA localization	96	8	7.92	1150	0.54192	0.08259
GO:0032970	regulation of actin filament-based process	89	6	7.34	1556	0.75387	0.08279
GO:0009144	purine nucleoside triphosphate metabolic process	112	4	9.24	2229	0.98578	0.08333
GO:0006163	purine nucleotide metabolic process	152	5	12.54	2316	0.99628	0.08366
GO:0035214	eye-antennal disc development	51	5	4.21	908	0.41314	0.0861
GO:0007266	Rho protein signal transduction	51	8	4.21	410	0.05551	0.08852
GO:0030718	germ-line stem cell population maintenance	65	7	5.36	698	0.2873	0.09665
GO:0000910	cytokinesis	94	22	7.75	128	5.4e-06	0.10407
GO:0006367	transcription initiation from RNA polymerase II promoter	76	8	6.27	700	0.28838	0.10608
GO:0090068	positive regulation of cell cycle process	33	7	2.72	339	0.01615	0.10717
GO:0007406	negative regulation of neuroblast proliferation	31	5	2.56	480	0.10732	0.10732
GO:0033260	nuclear DNA replication	12	3	0.99	438	0.07007	0.10787
GO:0007282	cystoblast division	17	3	1.4	558	0.16026	0.108
GO:0006273	lagging strand elongation	7	2	0.58	485	0.10805	0.10805
GO:0006398	mRNA 3'-end processing by stem-loop binding and cleavage	7	2	0.58	486	0.10805	0.10805
GO:0006662	glycerol ether metabolic process	7	2	0.58	487	0.10805	0.10805
GO:0006967	positive regulation of antifungal peptide biosynthetic process	7	2	0.58	488	0.10805	0.10805
GO:0007050	cell cycle arrest	7	2	0.58	489	0.10805	0.10805
GO:0009220	pyrimidine ribonucleotide biosynthetic process	7	2	0.58	490	0.10805	0.10805
GO:0009263	deoxyribonucleotide biosynthetic process	7	2	0.58	491	0.10805	0.10805
GO:0070076	histone lysine demethylation	7	2	0.58	492	0.10805	0.10805
GO:0090309	positive regulation of methylation-dependent chromatin silencing	7	2	0.58	493	0.10805	0.10805
GO:0016573	histone acetylation	74	16	6.1	189	0.00027	0.11437
GO:0031122	cytoplasmic microtubule organization	23	4	1.9	505	0.1161	0.1161
GO:0008630	intrinsic apoptotic signaling pathway in response to DNA damage	15	3	1.24	509	0.12085	0.12085
GO:0051091	positive regulation of DNA binding transcription factor activity	15	3	1.24	510	0.12085	0.12085
GO:0023052	signaling	1426	84	117.61	2428	0.99993	0.12171
GO:1902115	regulation of organelle assembly	24	4	1.98	516	0.13075	0.13075
GO:0007098	centrosome cycle	65	20	5.36	92	1.3e-07	0.13347
GO:0006302	double-strand break repair	69	20	5.69	100	3.8e-07	0.13363
GO:0070507	regulation of microtubule cytoskeleton organization	40	11	3.3	191	0.00028	0.13405
GO:0010529	negative regulation of transposition	14	3	1.15	477	0.10268	0.13627
GO:0000916	actomyosin contractile ring contraction	8	2	0.66	523	0.13646	0.13646
GO:0006544	glycine metabolic process	8	2	0.66	524	0.13646	0.13646
GO:0016578	histone deubiquitination	8	2	0.66	525	0.13646	0.13646
GO:0018410	C-terminal protein amino acid modification	8	2	0.66	526	0.13646	0.13646
GO:0031453	positive regulation of heterochromatin assembly	8	2	0.66	527	0.13646	0.13646
GO:0042135	neurotransmitter catabolic process	8	2	0.66	528	0.13646	0.13646
GO:0048096	chromatin-mediated maintenance of transcription	8	2	0.66	529	0.13646	0.13646
GO:0072697	protein localization to cell cortex	8	2	0.66	530	0.13646	0.13646
GO:0097150	neuronal stem cell population maintenance	8	2	0.66	531	0.13646	0.13646
GO:0007369	gastrulation	64	5	5.28	1286	0.61697	0.13707
GO:2000736	regulation of stem cell differentiation	26	4	2.14	565	0.16213	0.13999
GO:0035025	positive regulation of Rho protein signal transduction	16	3	1.32	542	0.14008	0.14008
GO:0051642	centrosome localization	16	3	1.32	543	0.14008	0.14008
GO:1903047	mitotic cell cycle process	288	85	23.75	11	2.7e-27	0.14228
GO:0030163	protein catabolic process	258	18	21.28	1696	0.80622	0.14271
GO:0051726	regulation of cell cycle	268	74	22.1	17	7.5e-22	0.14272
GO:0008258	head involution	34	5	2.8	546	0.14424	0.14424
GO:0090090	negative regulation of canonical Wnt signaling pathway	25	4	2.06	547	0.14611	0.14611
GO:0010564	regulation of cell cycle process	143	45	11.79	32	5.7e-16	0.14984
GO:0007017	microtubule-based process	322	63	26.56	61	3.7e-11	0.15006
GO:2000113	negative regulation of cellular macromolecule biosynthetic process	353	56	29.11	110	1e-06	0.15127
GO:0051225	spindle assembly	61	16	5.03	144	2.3e-05	0.15491
GO:0051303	establishment of chromosome localization	21	8	1.73	176	0.00016	0.15679
GO:0033047	regulation of mitotic sister chromatid segregation	32	8	2.64	264	0.00363	0.15702
GO:0006271	DNA strand elongation involved in DNA replication	15	6	1.24	223	0.0008	0.15717
GO:0045862	positive regulation of proteolysis	49	8	4.04	396	0.04535	0.15737
GO:0006310	DNA recombination	74	27	6.1	53	9e-12	0.15748
GO:0010952	positive regulation of peptidase activity	24	5	1.98	389	0.04288	0.15761
GO:0045747	positive regulation of Notch signaling pathway	35	5	2.89	554	0.15762	0.15762
GO:0035264	multicellular organism growth	43	6	3.55	540	0.13934	0.15775
GO:1905268	negative regulation of chromatin organization	21	4	1.73	465	0.08917	0.1578
GO:0016180	snRNA processing	24	4	1.98	517	0.13075	0.15786
GO:1903322	positive regulation of protein modification by small protein conjugation or removal	14	3	1.15	478	0.10268	0.15791
GO:0032231	regulation of actin filament bundle assembly	10	2	0.82	601	0.19701	0.15808
GO:0046364	monosaccharide biosynthetic process	11	2	0.91	639	0.22838	0.1581
GO:1901616	organic hydroxy compound catabolic process	15	2	1.24	826	0.35438	0.15818
GO:0060811	intracellular mRNA localization involved in anterior/posterior axis specification	58	5	4.78	1102	0.52747	0.15832
GO:0006913	nucleocytoplasmic transport	109	8	8.99	1436	0.68677	0.15863
GO:0070201	regulation of establishment of protein localization	50	3	4.12	1651	0.79293	0.15866
GO:0002682	regulation of immune system process	187	14	15.42	1438	0.68833	0.15874
GO:0042326	negative regulation of phosphorylation	64	2	5.28	2159	0.97311	0.1592
GO:0009996	negative regulation of cell fate specification	17	3	1.4	559	0.16026	0.16026
GO:0045448	mitotic cell cycle, embryonic	37	13	3.05	123	4e-06	0.16237
GO:0030154	cell differentiation	1361	113	112.25	1022	0.48536	0.16299
GO:0043044	ATP-dependent chromatin remodeling	32	8	2.64	265	0.00363	0.16442
GO:0051299	centrosome separation	21	7	1.73	230	0.00104	0.16446
GO:0051028	mRNA transport	42	5	3.46	672	0.26288	0.16613
GO:0031000	response to caffeine	9	2	0.74	570	0.16625	0.16625
GO:0032508	DNA duplex unwinding	9	2	0.74	571	0.16625	0.16625
GO:0034644	cellular response to UV	9	2	0.74	572	0.16625	0.16625
GO:0045003	double-strand break repair via synthesis-dependent strand annealing	9	2	0.74	573	0.16625	0.16625
GO:0045314	regulation of compound eye photoreceptor development	9	2	0.74	574	0.16625	0.16625
GO:0035172	hemocyte proliferation	43	4	3.55	1018	0.4787	0.16661
GO:0045746	negative regulation of Notch signaling pathway	36	5	2.97	581	0.17148	0.17148
GO:0000226	microtubule cytoskeleton organization	263	55	21.69	63	5e-11	0.18071
GO:0035293	chitin-based larval cuticle pattern formation	18	3	1.48	588	0.18124	0.18124
GO:0046529	imaginal disc fusion, thorax closure	18	3	1.48	589	0.18124	0.18124
GO:0007443	Malpighian tubule morphogenesis	37	5	3.05	594	0.1858	0.1858
GO:0045944	positive regulation of transcription by RNA polymerase II	230	23	18.97	598	0.19246	0.18721
GO:0008284	positive regulation of cell proliferation	58	7	4.78	617	0.19866	0.18762
GO:0000022	mitotic spindle elongation	10	2	0.82	602	0.19701	0.19701
GO:0007026	negative regulation of microtubule depolymerization	10	2	0.82	603	0.19701	0.19701
GO:0007096	regulation of exit from mitosis	10	2	0.82	604	0.19701	0.19701
GO:0030708	germarium-derived female germ-line cyst encapsulation	10	2	0.82	605	0.19701	0.19701
GO:0031062	positive regulation of histone methylation	10	2	0.82	606	0.19701	0.19701
GO:0045742	positive regulation of epidermal growth factor receptor signaling pathway	10	2	0.82	607	0.19701	0.19701
GO:0031146	SCF-dependent proteasomal ubiquitin-dependent protein catabolic process	38	5	3.13	619	0.20053	0.20053
GO:0007304	chorion-containing eggshell formation	105	18	8.66	251	0.00214	0.20693
GO:0006396	RNA processing	524	35	43.22	2001	0.92798	0.21003
GO:1903046	meiotic cell cycle process	175	53	14.43	28	8.5e-18	0.21413
GO:0045892	negative regulation of transcription, DNA-templated	277	44	22.85	137	1.5e-05	0.21841
GO:0010389	regulation of G2/M transition of mitotic cell cycle	28	10	2.31	158	4.5e-05	0.22459
GO:0007279	pole cell formation	20	3	1.65	634	0.22513	0.22513
GO:0006275	regulation of DNA replication	27	10	2.23	152	3.1e-05	0.22517
GO:0006139	nucleobase-containing compound metabolic process	1946	271	160.5	15	3e-24	0.22585
GO:0007091	metaphase/anaphase transition of mitotic cell cycle	30	7	2.47	310	0.00954	0.2263
GO:0009566	fertilization	30	7	2.47	311	0.00954	0.2263
GO:0000731	DNA synthesis involved in DNA repair	10	5	0.82	219	0.00067	0.22643
GO:0001672	regulation of chromatin assembly or disassembly	15	5	1.24	287	0.00561	0.22657
GO:0007144	female meiosis I	8	4	0.66	255	0.00245	0.22672
GO:0007338	single fertilization	27	6	2.23	348	0.02032	0.22684
GO:0090329	regulation of DNA-dependent DNA replication	15	4	1.24	372	0.03002	0.22692
GO:0031114	regulation of microtubule depolymerization	13	3	1.07	460	0.08572	0.22721
GO:0016055	Wnt signaling pathway	97	11	8	584	0.17402	0.22727
GO:0051262	protein tetramerization	8	2	0.66	532	0.13646	0.22741
GO:0070734	histone H3-K27 methylation	9	2	0.74	575	0.16625	0.22744
GO:1903321	negative regulation of protein modification by small protein conjugation or removal	9	2	0.74	576	0.16625	0.22744
GO:0000726	non-recombinational repair	10	2	0.82	608	0.19701	0.22747
GO:0051098	regulation of binding	23	3	1.9	714	0.29398	0.22749
GO:0035017	cuticle pattern formation	29	5	2.39	459	0.08566	0.2275
GO:0061647	histone H3-K9 modification	12	2	0.99	662	0.26004	0.22752
GO:0060070	canonical Wnt signaling pathway	66	8	5.44	585	0.17433	0.22753
GO:0006584	catecholamine metabolic process	14	2	1.15	729	0.32324	0.22758
GO:0019395	fatty acid oxidation	35	3	2.89	1170	0.56031	0.22784
GO:0030952	establishment or maintenance of cytoskeleton polarity	49	4	4.04	1227	0.58392	0.22789
GO:0048278	vesicle docking	28	2	2.31	1418	0.68474	0.22798
GO:0000737	DNA catabolic process, endonucleolytic	11	2	0.91	640	0.22838	0.22838
GO:0016973	poly(A)+ mRNA export from nucleus	11	2	0.91	641	0.22838	0.22838
GO:0051663	oocyte nucleus localization involved in oocyte dorsal/ventral axis specification	11	2	0.91	642	0.22838	0.22838
GO:0090303	positive regulation of wound healing	11	2	0.91	643	0.22838	0.22838
GO:0010259	multicellular organism aging	137	9	11.3	1697	0.80756	0.22869
GO:0050767	regulation of neurogenesis	175	12	14.43	1648	0.78927	0.22874
GO:0090174	organelle membrane fusion	63	2	5.2	2155	0.97106	0.22899
GO:0031098	stress-activated protein kinase signaling cascade	79	5	6.52	1650	0.79153	0.22989
GO:0008219	cell death	318	20	26.23	1980	0.92405	0.23014
GO:0018105	peptidyl-serine phosphorylation	40	5	3.3	651	0.23109	0.23109
GO:0009408	response to heat	67	6	5.53	1020	0.47974	0.23236
GO:0070925	organelle assembly	269	37	22.19	235	0.00127	0.23675
GO:0007275	multicellular organism development	1822	141	150.27	1746	0.83156	0.2445
GO:0007419	ventral cord development	62	7	5.11	660	0.24805	0.24805
GO:0010212	response to ionizing radiation	39	10	3.22	229	0.00095	0.25638
GO:0045595	regulation of cell differentiation	290	25	23.92	931	0.43874	0.25999
GO:0006998	nuclear envelope organization	12	2	0.99	663	0.26004	0.26004
GO:0035234	ectopic germ cell programmed cell death	12	2	0.99	664	0.26004	0.26004
GO:0043001	Golgi to plasma membrane protein transport	12	2	0.99	665	0.26004	0.26004
GO:0009062	fatty acid catabolic process	44	4	3.63	1025	0.49701	0.26044
GO:0007422	peripheral nervous system development	74	8	6.1	676	0.26403	0.26403
GO:0034472	snRNA 3'-end processing	22	3	1.81	682	0.27078	0.27078
GO:0007399	nervous system development	904	62	74.56	2099	0.95678	0.28452
GO:0006333	chromatin assembly or disassembly	47	17	3.88	88	7.9e-08	0.28603
GO:0070192	chromosome organization involved in meiotic cell cycle	40	12	3.3	164	5.8e-05	0.28792
GO:0046785	microtubule polymerization	20	5	1.65	353	0.02053	0.29021
GO:0007019	microtubule depolymerization	17	4	1.4	398	0.04593	0.29053
GO:0008380	RNA splicing	243	22	20.04	832	0.35466	0.29078
GO:0042386	hemocyte differentiation	36	4	2.97	754	0.34535	0.29119
GO:0070372	regulation of ERK1 and ERK2 cascade	50	5	4.12	851	0.39632	0.29126
GO:0051452	intracellular pH reduction	16	2	1.32	840	0.38499	0.29134
GO:1905330	regulation of morphogenesis of an epithelium	20	2	1.65	1065	0.50004	0.29148
GO:0070897	DNA-templated transcriptional preinitiation complex assembly	21	2	1.73	1090	0.52659	0.29151
GO:0007527	adult somatic muscle development	13	2	1.07	701	0.29173	0.29173
GO:0016575	histone deacetylation	13	2	1.07	702	0.29173	0.29173
GO:0030237	female sex determination	13	2	1.07	703	0.29173	0.29173
GO:0030720	oocyte localization involved in germarium-derived egg chamber formation	13	2	1.07	704	0.29173	0.29173
GO:0031145	anaphase-promoting complex-dependent catabolic process	13	2	1.07	705	0.29173	0.29173
GO:0046427	positive regulation of JAK-STAT cascade	13	2	1.07	706	0.29173	0.29173
GO:0033993	response to lipid	64	5	5.28	1287	0.61697	0.29175
GO:0030705	cytoskeleton-dependent intracellular transport	56	4	4.62	1440	0.68962	0.29189
GO:0031334	positive regulation of protein complex assembly	53	3	4.37	1739	0.82459	0.29221
GO:0045597	positive regulation of cell differentiation	86	5	7.09	1785	0.8484	0.29253
GO:0046843	dorsal appendage formation	44	5	3.63	716	0.29558	0.29558
GO:0015031	protein transport	379	20	31.26	2263	0.99124	0.30051
GO:0051301	cell division	225	43	18.56	91	1.1e-07	0.30541
GO:0007444	imaginal disc development	457	39	37.69	930	0.43532	0.30665
GO:0000278	mitotic cell cycle	419	107	34.56	8	2e-28	0.31428
GO:0007059	chromosome segregation	170	65	14.02	9	3.6e-28	0.31435
GO:0009411	response to UV	23	4	1.9	506	0.1161	0.32232
GO:0008589	regulation of smoothened signaling pathway	34	4	2.8	719	0.30679	0.32298
GO:0007464	R3/R4 cell fate commitment	14	2	1.15	730	0.32324	0.32324
GO:0042026	protein refolding	14	2	1.15	731	0.32324	0.32324
GO:0007254	JNK cascade	65	3	5.36	1948	0.91308	0.3256
GO:0017148	negative regulation of translation	73	7	6.02	854	0.39704	0.32618
GO:0048749	compound eye development	304	22	25.07	1611	0.77323	0.33551
GO:0010948	negative regulation of cell cycle process	60	21	4.95	76	4.6e-09	0.34222
GO:0070828	heterochromatin organization	44	11	3.63	221	0.00068	0.34651
GO:0030071	regulation of mitotic metaphase/anaphase transition	27	6	2.23	349	0.02032	0.34827
GO:0043281	regulation of cysteine-type endopeptidase activity involved in apoptotic process	23	5	1.9	382	0.03632	0.3486
GO:0070816	phosphorylation of RNA polymerase II C-terminal domain	13	3	1.07	461	0.08572	0.34917
GO:0007283	spermatogenesis	153	15	12.62	690	0.27899	0.34945
GO:0006479	protein methylation	69	7	5.69	751	0.34161	0.34947
GO:0030706	germarium-derived oocyte differentiation	33	4	2.72	699	0.28766	0.34949
GO:0009888	tissue development	860	72	70.93	1003	0.46448	0.34957
GO:0051438	regulation of ubiquitin-protein transferase activity	11	2	0.91	644	0.22838	0.34958
GO:0035304	regulation of protein dephosphorylation	12	2	0.99	666	0.26004	0.34962
GO:0007549	dosage compensation	17	2	1.4	911	0.41495	0.34982
GO:0000290	deadenylation-dependent decapping of nuclear-transcribed mRNA	5	1	0.41	757	0.34982	0.34982
GO:0000467	exonucleolytic trimming to generate mature 3'-end of 5.8S rRNA from tricistronic rRNA transcript (SS...	5	1	0.41	758	0.34982	0.34982
GO:0001678	cellular glucose homeostasis	5	1	0.41	759	0.34982	0.34982
GO:0001706	endoderm formation	5	1	0.41	760	0.34982	0.34982
GO:0002701	negative regulation of production of molecular mediator of immune response	5	1	0.41	761	0.34982	0.34982
GO:0006265	DNA topological change	5	1	0.41	762	0.34982	0.34982
GO:0006627	protein processing involved in protein targeting to mitochondrion	5	1	0.41	763	0.34982	0.34982
GO:0006677	glycosylceramide metabolic process	5	1	0.41	764	0.34982	0.34982
GO:0006939	smooth muscle contraction	5	1	0.41	765	0.34982	0.34982
GO:0007004	telomere maintenance via telomerase	5	1	0.41	766	0.34982	0.34982
GO:0007053	spindle assembly involved in male meiosis	5	1	0.41	767	0.34982	0.34982
GO:0007415	defasciculation of motor neuron axon	5	1	0.41	768	0.34982	0.34982
GO:0009147	pyrimidine nucleoside triphosphate metabolic process	5	1	0.41	769	0.34982	0.34982
GO:0010955	negative regulation of protein processing	5	1	0.41	770	0.34982	0.34982
GO:0015014	heparan sulfate proteoglycan biosynthetic process, polysaccharide chain biosynthetic process	5	1	0.41	771	0.34982	0.34982
GO:0015858	nucleoside transport	5	1	0.41	772	0.34982	0.34982
GO:0016926	protein desumoylation	5	1	0.41	773	0.34982	0.34982
GO:0019320	hexose catabolic process	5	1	0.41	774	0.34982	0.34982
GO:0030037	actin filament reorganization involved in cell cycle	5	1	0.41	775	0.34982	0.34982
GO:0030423	targeting of mRNA for destruction involved in RNA interference	5	1	0.41	776	0.34982	0.34982
GO:0031061	negative regulation of histone methylation	5	1	0.41	777	0.34982	0.34982
GO:0031112	positive regulation of microtubule polymerization or depolymerization	5	1	0.41	778	0.34982	0.34982
GO:0031113	regulation of microtubule polymerization	5	1	0.41	779	0.34982	0.34982
GO:0034284	response to monosaccharide	5	1	0.41	780	0.34982	0.34982
GO:0034453	microtubule anchoring	5	1	0.41	781	0.34982	0.34982
GO:0035721	intraciliary retrograde transport	5	1	0.41	782	0.34982	0.34982
GO:0042364	water-soluble vitamin biosynthetic process	5	1	0.41	783	0.34982	0.34982
GO:0042423	catecholamine biosynthetic process	5	1	0.41	784	0.34982	0.34982
GO:0042688	crystal cell differentiation	5	1	0.41	785	0.34982	0.34982
GO:0043388	positive regulation of DNA binding	5	1	0.41	786	0.34982	0.34982
GO:0045823	positive regulation of heart contraction	5	1	0.41	787	0.34982	0.34982
GO:0045943	positive regulation of transcription by RNA polymerase I	5	1	0.41	788	0.34982	0.34982
GO:0046132	pyrimidine ribonucleoside biosynthetic process	5	1	0.41	789	0.34982	0.34982
GO:0048383	mesectoderm development	5	1	0.41	790	0.34982	0.34982
GO:0050482	arachidonic acid secretion	5	1	0.41	791	0.34982	0.34982
GO:0050848	regulation of calcium-mediated signaling	5	1	0.41	792	0.34982	0.34982
GO:0051013	microtubule severing	5	1	0.41	793	0.34982	0.34982
GO:0051036	regulation of endosome size	5	1	0.41	794	0.34982	0.34982
GO:0051289	protein homotetramerization	5	1	0.41	795	0.34982	0.34982
GO:0051569	regulation of histone H3-K4 methylation	5	1	0.41	796	0.34982	0.34982
GO:0061060	negative regulation of peptidoglycan recognition protein signaling pathway	5	1	0.41	797	0.34982	0.34982
GO:0061088	regulation of sequestering of zinc ion	5	1	0.41	798	0.34982	0.34982
GO:0061668	mitochondrial ribosome assembly	5	1	0.41	799	0.34982	0.34982
GO:0071046	nuclear polyadenylation-dependent ncRNA catabolic process	5	1	0.41	800	0.34982	0.34982
GO:0072595	maintenance of protein localization in organelle	5	1	0.41	801	0.34982	0.34982
GO:0097327	response to antineoplastic agent	5	1	0.41	802	0.34982	0.34982
GO:0097384	cellular lipid biosynthetic process	5	1	0.41	803	0.34982	0.34982
GO:1900117	regulation of execution phase of apoptosis	5	1	0.41	804	0.34982	0.34982
GO:1901070	guanosine-containing compound biosynthetic process	5	1	0.41	805	0.34982	0.34982
GO:1902969	mitotic DNA replication	5	1	0.41	806	0.34982	0.34982
GO:2000117	negative regulation of cysteine-type endopeptidase activity	5	1	0.41	807	0.34982	0.34982
GO:2001022	positive regulation of response to DNA damage stimulus	5	1	0.41	808	0.34982	0.34982
GO:0007188	adenylate cyclase-modulating G-protein coupled receptor signaling pathway	31	3	2.56	1014	0.477	0.34989
GO:0050777	negative regulation of immune response	38	3	3.13	1290	0.61725	0.35018
GO:0042278	purine nucleoside metabolic process	27	2	2.23	1366	0.66512	0.35022
GO:0000578	embryonic axis specification	119	7	9.81	1838	0.87076	0.3515
GO:0010941	regulation of cell death	228	16	18.8	1628	0.78741	0.35152
GO:0045165	cell fate commitment	261	24	21.53	724	0.31718	0.353
GO:0007629	flight behavior	15	2	1.24	827	0.35438	0.35438
GO:0032940	secretion by cell	175	5	14.43	2384	0.99916	0.35479
GO:0016567	protein ubiquitination	154	12	12.7	1307	0.62559	0.35853
GO:0051321	meiotic cell cycle	184	55	15.18	26	3.8e-18	0.38161
GO:0033674	positive regulation of kinase activity	70	8	5.77	630	0.21742	0.38372
GO:0055059	asymmetric neuroblast division	38	4	3.13	839	0.38401	0.38401
GO:0000132	establishment of mitotic spindle orientation	16	2	1.32	841	0.38499	0.38499
GO:0008298	intracellular mRNA localization	77	7	6.35	942	0.45244	0.38502
GO:0006997	nucleus organization	54	6	4.45	693	0.28458	0.38627
GO:0006366	transcription by RNA polymerase II	566	71	46.68	177	0.00017	0.39311
GO:0031023	microtubule organizing center organization	72	21	5.94	96	1.7e-07	0.39559
GO:0000086	G2/M transition of mitotic cell cycle	34	11	2.8	162	5.4e-05	0.39935
GO:0031401	positive regulation of protein modification process	166	19	13.69	466	0.08918	0.40086
GO:0071479	cellular response to ionizing radiation	17	4	1.4	399	0.04593	0.40236
GO:0042675	compound eye cone cell differentiation	16	3	1.32	544	0.14008	0.40286
GO:0031057	negative regulation of histone modification	11	2	0.91	645	0.22838	0.40317
GO:0031398	positive regulation of protein ubiquitination	12	2	0.99	667	0.26004	0.40321
GO:0072348	sulfur compound transport	16	2	1.32	842	0.38499	0.40339
GO:0000335	negative regulation of transposition, DNA-mediated	6	1	0.49	861	0.40349	0.40349
GO:0000729	DNA double-strand break processing	6	1	0.49	862	0.40349	0.40349
GO:0006012	galactose metabolic process	6	1	0.49	863	0.40349	0.40349
GO:0006801	superoxide metabolic process	6	1	0.49	864	0.40349	0.40349
GO:0007477	notum development	6	1	0.49	865	0.40349	0.40349
GO:0009303	rRNA transcription	6	1	0.49	866	0.40349	0.40349
GO:0009394	2'-deoxyribonucleotide metabolic process	6	1	0.49	867	0.40349	0.40349
GO:0010586	miRNA metabolic process	6	1	0.49	868	0.40349	0.40349
GO:0030950	establishment or maintenance of actin cytoskeleton polarity	6	1	0.49	869	0.40349	0.40349
GO:0031397	negative regulation of protein ubiquitination	6	1	0.49	870	0.40349	0.40349
GO:0031990	mRNA export from nucleus in response to heat stress	6	1	0.49	871	0.40349	0.40349
GO:0032233	positive regulation of actin filament bundle assembly	6	1	0.49	872	0.40349	0.40349
GO:0032875	regulation of DNA endoreduplication	6	1	0.49	873	0.40349	0.40349
GO:0034629	cellular protein-containing complex localization	6	1	0.49	874	0.40349	0.40349
GO:0036065	fucosylation	6	1	0.49	875	0.40349	0.40349
GO:0038203	TORC2 signaling	6	1	0.49	876	0.40349	0.40349
GO:0040031	snRNA modification	6	1	0.49	877	0.40349	0.40349
GO:0043393	regulation of protein binding	6	1	0.49	878	0.40349	0.40349
GO:0043519	regulation of myosin II filament organization	6	1	0.49	879	0.40349	0.40349
GO:0046039	GTP metabolic process	6	1	0.49	880	0.40349	0.40349
GO:0048526	imaginal disc-derived wing expansion	6	1	0.49	881	0.40349	0.40349
GO:0051205	protein insertion into membrane	6	1	0.49	882	0.40349	0.40349
GO:0051443	positive regulation of ubiquitin-protein transferase activity	6	1	0.49	883	0.40349	0.40349
GO:0051492	regulation of stress fiber assembly	6	1	0.49	884	0.40349	0.40349
GO:0051781	positive regulation of cell division	6	1	0.49	885	0.40349	0.40349
GO:0061085	regulation of histone H3-K27 methylation	6	1	0.49	886	0.40349	0.40349
GO:0097320	plasma membrane tubulation	6	1	0.49	887	0.40349	0.40349
GO:1901216	positive regulation of neuron death	6	1	0.49	888	0.40349	0.40349
GO:1903078	positive regulation of protein localization to plasma membrane	6	1	0.49	889	0.40349	0.40349
GO:2000105	positive regulation of DNA-dependent DNA replication	6	1	0.49	890	0.40349	0.40349
GO:0060548	negative regulation of cell death	109	9	8.99	1156	0.54962	0.40376
GO:0043410	positive regulation of MAPK cascade	85	7	7.01	1169	0.55921	0.40376
GO:0042176	regulation of protein catabolic process	55	4	4.54	1413	0.67577	0.40405
GO:0007472	wing disc morphogenesis	226	18	18.64	1240	0.59864	0.40412
GO:0001932	regulation of protein phosphorylation	213	16	17.57	1442	0.69074	0.40463
GO:0032870	cellular response to hormone stimulus	84	3	6.93	2170	0.97401	0.40588
GO:1901575	organic substance catabolic process	633	43	52.21	2018	0.93194	0.40915
GO:0007112	male meiosis cytokinesis	28	3	2.31	903	0.41002	0.41002
GO:0007294	germarium-derived oocyte fate determination	28	3	2.31	904	0.41002	0.41002
GO:0043066	negative regulation of apoptotic process	89	8	7.34	997	0.45425	0.41134
GO:0060271	cilium assembly	42	8	3.46	346	0.01964	0.41161
GO:0035019	somatic stem cell population maintenance	17	2	1.4	912	0.41495	0.41495
GO:1904263	positive regulation of TORC1 signaling	17	2	1.4	913	0.41495	0.41495
GO:0048477	oogenesis	552	53	45.53	518	0.13177	0.41533
GO:0007474	imaginal disc-derived wing vein specification	40	4	3.3	921	0.42238	0.42238
GO:0043087	regulation of GTPase activity	86	5	7.09	1786	0.8484	0.43566
GO:0042078	germ-line stem cell division	37	9	3.05	260	0.00253	0.4394
GO:0007051	spindle organization	108	32	8.91	64	6.3e-11	0.43943
GO:0006383	transcription by RNA polymerase III	18	2	1.48	933	0.44417	0.44417
GO:0032436	positive regulation of proteasomal ubiquitin-dependent protein catabolic process	18	2	1.48	934	0.44417	0.44417
GO:0044719	regulation of imaginal disc-derived wing size	18	2	1.48	935	0.44417	0.44417
GO:0031507	heterochromatin assembly	18	5	1.48	319	0.01301	0.45095
GO:0000079	regulation of cyclin-dependent protein serine/threonine kinase activity	17	4	1.4	400	0.04593	0.45148
GO:0007020	microtubule nucleation	12	3	0.99	439	0.07007	0.45181
GO:0043244	regulation of protein complex disassembly	25	4	2.06	548	0.14611	0.45185
GO:0048580	regulation of post-embryonic development	16	3	1.32	545	0.14008	0.452
GO:0031058	positive regulation of histone modification	17	3	1.4	560	0.16026	0.45205
GO:0006044	N-acetylglucosamine metabolic process	7	1	0.58	943	0.45272	0.45272
GO:0006303	double-strand break repair via nonhomologous end joining	7	1	0.58	944	0.45272	0.45272
GO:0006388	tRNA splicing, via endonucleolytic cleavage and ligation	7	1	0.58	945	0.45272	0.45272
GO:0006415	translational termination	7	1	0.58	946	0.45272	0.45272
GO:0006541	glutamine metabolic process	7	1	0.58	947	0.45272	0.45272
GO:0007111	meiosis II cytokinesis	7	1	0.58	948	0.45272	0.45272
GO:0007311	maternal specification of dorsal/ventral axis, oocyte, germ-line encoded	7	1	0.58	949	0.45272	0.45272
GO:0007516	hemocyte development	7	1	0.58	950	0.45272	0.45272
GO:0009130	pyrimidine nucleoside monophosphate biosynthetic process	7	1	0.58	951	0.45272	0.45272
GO:0010771	negative regulation of cell morphogenesis involved in differentiation	7	1	0.58	952	0.45272	0.45272
GO:0019934	cGMP-mediated signaling	7	1	0.58	953	0.45272	0.45272
GO:0021551	central nervous system morphogenesis	7	1	0.58	954	0.45272	0.45272
GO:0031053	primary miRNA processing	7	1	0.58	955	0.45272	0.45272
GO:0031106	septin ring organization	7	1	0.58	956	0.45272	0.45272
GO:0034126	positive regulation of MyD88-dependent toll-like receptor signaling pathway	7	1	0.58	957	0.45272	0.45272
GO:0035176	social behavior	7	1	0.58	958	0.45272	0.45272
GO:0035190	syncytial nuclear migration	7	1	0.58	959	0.45272	0.45272
GO:0035308	negative regulation of protein dephosphorylation	7	1	0.58	960	0.45272	0.45272
GO:0035335	peptidyl-tyrosine dephosphorylation	7	1	0.58	961	0.45272	0.45272
GO:0042401	cellular biogenic amine biosynthetic process	7	1	0.58	962	0.45272	0.45272
GO:0042595	behavioral response to starvation	7	1	0.58	963	0.45272	0.45272
GO:0045842	positive regulation of mitotic metaphase/anaphase transition	7	1	0.58	964	0.45272	0.45272
GO:0046533	negative regulation of photoreceptor cell differentiation	7	1	0.58	965	0.45272	0.45272
GO:0046672	positive regulation of compound eye retinal cell programmed cell death	7	1	0.58	966	0.45272	0.45272
GO:0048567	ectodermal digestive tract morphogenesis	7	1	0.58	967	0.45272	0.45272
GO:0061357	positive regulation of Wnt protein secretion	7	1	0.58	968	0.45272	0.45272
GO:0071218	cellular response to misfolded protein	7	1	0.58	969	0.45272	0.45272
GO:1901409	positive regulation of phosphorylation of RNA polymerase II C-terminal domain	7	1	0.58	970	0.45272	0.45272
GO:0030177	positive regulation of Wnt signaling pathway	35	3	2.89	1171	0.56031	0.4529
GO:0034637	cellular carbohydrate biosynthetic process	23	2	1.9	1175	0.57677	0.45291
GO:0001738	morphogenesis of a polarized epithelium	100	8	8.25	1231	0.58947	0.45311
GO:0035088	establishment or maintenance of apical/basal cell polarity	35	2	2.89	1658	0.79689	0.45348
GO:0071695	anatomical structure maturation	56	3	4.62	1797	0.85202	0.4539
GO:0007367	segment polarity determination	30	3	2.47	998	0.45503	0.45503
GO:0002009	morphogenesis of an epithelium	481	35	39.67	1702	0.81131	0.45584
GO:0040003	chitin-based cuticle development	82	7	6.76	1085	0.52011	0.46053
GO:0048666	neuron development	512	24	42.23	2403	0.99958	0.4641
GO:0000387	spliceosomal snRNP assembly	19	2	1.57	1007	0.47255	0.47255
GO:0043967	histone H4 acetylation	19	2	1.57	1008	0.47255	0.47255
GO:0044275	cellular carbohydrate catabolic process	19	2	1.57	1009	0.47255	0.47255
GO:0045167	asymmetric protein localization involved in cell fate determination	19	2	1.57	1010	0.47255	0.47255
GO:0045792	negative regulation of cell size	19	2	1.57	1011	0.47255	0.47255
GO:0008063	Toll signaling pathway	40	3	3.3	1356	0.65233	0.47321
GO:0006099	tricarboxylic acid cycle	31	3	2.56	1015	0.477	0.477
GO:0045089	positive regulation of innate immune response	47	4	3.88	1157	0.55017	0.47736
GO:0000398	mRNA splicing, via spliceosome	226	19	18.64	1071	0.50081	0.47968
GO:0007420	brain development	94	4	7.75	2100	0.95743	0.48178
GO:0048522	positive regulation of cellular process	1032	98	85.12	434	0.06708	0.48911
GO:0006807	nitrogen compound metabolic process	3667	363	302.44	93	1.5e-07	0.49468
GO:2000027	regulation of organ morphogenesis	75	10	6.19	463	0.08708	0.4958
GO:0035082	axoneme assembly	15	4	1.24	373	0.03002	0.49645
GO:0000289	nuclear-transcribed mRNA poly(A) tail shortening	13	3	1.07	462	0.08572	0.49695
GO:0031060	regulation of histone methylation	26	4	2.14	566	0.16213	0.49699
GO:0007277	pole cell development	28	4	2.31	599	0.19591	0.49709
GO:0034968	histone lysine methylation	43	5	3.55	691	0.27913	0.49723
GO:0040001	establishment of mitotic spindle localization	24	3	1.98	725	0.3173	0.4975
GO:0006071	glycerol metabolic process	8	1	0.66	1026	0.49791	0.49791
GO:0006525	arginine metabolic process	8	1	0.66	1027	0.49791	0.49791
GO:0006896	Golgi to vacuole transport	8	1	0.66	1028	0.49791	0.49791
GO:0007289	spermatid nucleus differentiation	8	1	0.66	1029	0.49791	0.49791
GO:0007319	negative regulation of oskar mRNA translation	8	1	0.66	1030	0.49791	0.49791
GO:0007440	foregut morphogenesis	8	1	0.66	1031	0.49791	0.49791
GO:0007458	progression of morphogenetic furrow involved in compound eye morphogenesis	8	1	0.66	1032	0.49791	0.49791
GO:0008057	eye pigment granule organization	8	1	0.66	1033	0.49791	0.49791
GO:0008348	negative regulation of antimicrobial humoral response	8	1	0.66	1034	0.49791	0.49791
GO:0032496	response to lipopolysaccharide	8	1	0.66	1035	0.49791	0.49791
GO:0035041	sperm chromatin decondensation	8	1	0.66	1036	0.49791	0.49791
GO:0035204	negative regulation of lamellocyte differentiation	8	1	0.66	1037	0.49791	0.49791
GO:0043144	snoRNA processing	8	1	0.66	1038	0.49791	0.49791
GO:0043697	cell dedifferentiation	8	1	0.66	1039	0.49791	0.49791
GO:0045035	sensory organ precursor cell division	8	1	0.66	1040	0.49791	0.49791
GO:0045705	negative regulation of salivary gland boundary specification	8	1	0.66	1041	0.49791	0.49791
GO:0048738	cardiac muscle tissue development	8	1	0.66	1042	0.49791	0.49791
GO:0060026	convergent extension	8	1	0.66	1043	0.49791	0.49791
GO:0072332	intrinsic apoptotic signaling pathway by p53 class mediator	8	1	0.66	1044	0.49791	0.49791
GO:1902669	positive regulation of axon guidance	8	1	0.66	1045	0.49791	0.49791
GO:1904262	negative regulation of TORC1 signaling	8	1	0.66	1046	0.49791	0.49791
GO:2001235	positive regulation of apoptotic signaling pathway	8	1	0.66	1047	0.49791	0.49791
GO:0006402	mRNA catabolic process	70	5	5.77	1445	0.69569	0.49858
GO:0030951	establishment or maintenance of microtubule cytoskeleton polarity	40	2	3.3	1801	0.85384	0.49889
GO:0000413	protein peptidyl-prolyl isomerization	20	2	1.65	1066	0.50004	0.50004
GO:0045879	negative regulation of smoothened signaling pathway	20	2	1.65	1067	0.50004	0.50004
GO:0008104	protein localization	570	38	47.01	2035	0.93765	0.5105
GO:0042594	response to starvation	109	7	8.99	1694	0.80602	0.51814
GO:0006165	nucleoside diphosphate phosphorylation	21	2	1.73	1091	0.52659	0.52659
GO:0007264	small GTPase mediated signal transduction	212	17	17.49	1230	0.58622	0.52732
GO:0070374	positive regulation of ERK1 and ERK2 cascade	46	4	3.79	1103	0.53277	0.53277
GO:0051302	regulation of cell division	23	6	1.9	298	0.00918	0.53697
GO:0002064	epithelial cell development	311	29	25.65	679	0.26848	0.53737
GO:0030111	regulation of Wnt signaling pathway	75	8	6.19	686	0.27613	0.53839
GO:0048565	digestive tract development	85	8	7.01	856	0.40277	0.53891
GO:0045937	positive regulation of phosphate metabolic process	146	13	12.04	923	0.42888	0.53892
GO:0110020	regulation of actomyosin structure organization	15	2	1.24	828	0.35438	0.53905
GO:0000187	activation of MAPK activity	9	1	0.74	1106	0.53936	0.53936
GO:0005991	trehalose metabolic process	9	1	0.74	1107	0.53936	0.53936
GO:0006020	inositol metabolic process	9	1	0.74	1108	0.53936	0.53936
GO:0006094	gluconeogenesis	9	1	0.74	1109	0.53936	0.53936
GO:0006390	mitochondrial transcription	9	1	0.74	1110	0.53936	0.53936
GO:0006465	signal peptide processing	9	1	0.74	1111	0.53936	0.53936
GO:0006515	protein quality control for misfolded or incompletely synthesized proteins	9	1	0.74	1112	0.53936	0.53936
GO:0006614	SRP-dependent cotranslational protein targeting to membrane	9	1	0.74	1113	0.53936	0.53936
GO:0006937	regulation of muscle contraction	9	1	0.74	1114	0.53936	0.53936
GO:0010312	detoxification of zinc ion	9	1	0.74	1115	0.53936	0.53936
GO:0031936	negative regulation of chromatin silencing	9	1	0.74	1116	0.53936	0.53936
GO:0043462	regulation of ATPase activity	9	1	0.74	1117	0.53936	0.53936
GO:0045198	establishment of epithelial cell apical/basal polarity	9	1	0.74	1118	0.53936	0.53936
GO:0046479	glycosphingolipid catabolic process	9	1	0.74	1119	0.53936	0.53936
GO:0048100	wing disc anterior/posterior pattern formation	9	1	0.74	1120	0.53936	0.53936
GO:0051567	histone H3-K9 methylation	9	1	0.74	1121	0.53936	0.53936
GO:0060232	delamination	9	1	0.74	1122	0.53936	0.53936
GO:0060361	flight	9	1	0.74	1123	0.53936	0.53936
GO:0060401	cytosolic calcium ion transport	9	1	0.74	1124	0.53936	0.53936
GO:0071322	cellular response to carbohydrate stimulus	9	1	0.74	1125	0.53936	0.53936
GO:0090328	regulation of olfactory learning	9	1	0.74	1126	0.53936	0.53936
GO:1902358	sulfate transmembrane transport	9	1	0.74	1127	0.53936	0.53936
GO:0045088	regulation of innate immune response	81	6	6.68	1371	0.66806	0.53995
GO:0007219	Notch signaling pathway	117	13	9.65	568	0.1657	0.54918
GO:0048813	dendrite morphogenesis	131	11	10.8	1088	0.52162	0.54924
GO:0007310	oocyte dorsal/ventral axis specification	40	5	3.3	652	0.23109	0.55076
GO:0008654	phospholipid biosynthetic process	68	7	5.61	738	0.32788	0.55104
GO:0070983	dendrite guidance	22	2	1.81	1161	0.55218	0.55218
GO:0051241	negative regulation of multicellular organismal process	159	17	13.11	564	0.16107	0.55583
GO:0006468	protein phosphorylation	370	35	30.52	629	0.21692	0.56328
GO:0007306	eggshell chorion assembly	71	13	5.86	275	0.0048	0.57294
GO:0045995	regulation of embryonic development	74	12	6.1	340	0.01711	0.57374
GO:0007405	neuroblast proliferation	84	11	6.93	458	0.08318	0.57491
GO:0045860	positive regulation of protein kinase activity	54	6	4.45	694	0.28458	0.57653
GO:0043279	response to alkaloid	19	3	1.57	623	0.20291	0.57661
GO:1902476	chloride transmembrane transport	23	2	1.9	1176	0.57677	0.57677
GO:0035075	response to ecdysone	40	3	3.3	1357	0.65233	0.57715
GO:0030727	germarium-derived female germ-line cyst formation	20	2	1.65	1068	0.50004	0.57729
GO:0000002	mitochondrial genome maintenance	10	1	0.82	1182	0.5774	0.5774
GO:0003384	apical constriction involved in gastrulation	10	1	0.82	1183	0.5774	0.5774
GO:0007615	anesthesia-resistant memory	10	1	0.82	1184	0.5774	0.5774
GO:0010977	negative regulation of neuron projection development	10	1	0.82	1185	0.5774	0.5774
GO:0015695	organic cation transport	10	1	0.82	1186	0.5774	0.5774
GO:0017001	antibiotic catabolic process	10	1	0.82	1187	0.5774	0.5774
GO:0018230	peptidyl-L-cysteine S-palmitoylation	10	1	0.82	1188	0.5774	0.5774
GO:0019236	response to pheromone	10	1	0.82	1189	0.5774	0.5774
GO:0030381	chorion-containing eggshell pattern formation	10	1	0.82	1190	0.5774	0.5774
GO:0030589	pseudocleavage involved in syncytial blastoderm formation	10	1	0.82	1191	0.5774	0.5774
GO:0030723	ovarian fusome organization	10	1	0.82	1192	0.5774	0.5774
GO:0040034	regulation of development, heterochronic	10	1	0.82	1193	0.5774	0.5774
GO:0042246	tissue regeneration	10	1	0.82	1194	0.5774	0.5774
GO:0043488	regulation of mRNA stability	10	1	0.82	1195	0.5774	0.5774
GO:0045292	mRNA cis splicing, via spliceosome	10	1	0.82	1196	0.5774	0.5774
GO:0045498	sex comb development	10	1	0.82	1197	0.5774	0.5774
GO:0045752	positive regulation of Toll signaling pathway	10	1	0.82	1198	0.5774	0.5774
GO:0046174	polyol catabolic process	10	1	0.82	1199	0.5774	0.5774
GO:0047496	vesicle transport along microtubule	10	1	0.82	1200	0.5774	0.5774
GO:0048082	regulation of adult chitin-containing cuticle pigmentation	10	1	0.82	1201	0.5774	0.5774
GO:0048142	germarium-derived cystoblast division	10	1	0.82	1202	0.5774	0.5774
GO:0060326	cell chemotaxis	10	1	0.82	1203	0.5774	0.5774
GO:0060795	cell fate commitment involved in formation of primary germ layer	10	1	0.82	1204	0.5774	0.5774
GO:0070509	calcium ion import	10	1	0.82	1205	0.5774	0.5774
GO:2000737	negative regulation of stem cell differentiation	10	1	0.82	1206	0.5774	0.5774
GO:0009116	nucleoside metabolic process	48	3	3.96	1605	0.76928	0.57812
GO:0048542	lymph gland development	46	2	3.79	1916	0.90279	0.57865
GO:0032956	regulation of actin cytoskeleton organization	88	5	7.26	1810	0.86207	0.57895
GO:0007507	heart development	88	6	7.26	1525	0.74411	0.58137
GO:0022008	neurogenesis	716	47	59.05	2136	0.96682	0.5859
GO:0032507	maintenance of protein location in cell	29	3	2.39	928	0.43269	0.5998
GO:0007097	nuclear migration	31	3	2.56	1016	0.477	0.59996
GO:0007526	larval somatic muscle development	24	2	1.98	1245	0.60035	0.60035
GO:0036099	female germ-line stem cell population maintenance	24	2	1.98	1246	0.60035	0.60035
GO:0036335	intestinal stem cell homeostasis	24	2	1.98	1247	0.60035	0.60035
GO:1902692	regulation of neuroblast proliferation	42	6	3.46	514	0.12827	0.61074
GO:0007530	sex determination	24	3	1.98	726	0.3173	0.61171
GO:0051222	positive regulation of protein transport	22	2	1.81	1162	0.55218	0.61224
GO:0007200	phospholipase C-activating G-protein coupled receptor signaling pathway	11	1	0.91	1256	0.6123	0.6123
GO:0007394	dorsal closure, elongation of leading edge cells	11	1	0.91	1257	0.6123	0.6123
GO:0007412	axon target recognition	11	1	0.91	1258	0.6123	0.6123
GO:0015701	bicarbonate transport	11	1	0.91	1259	0.6123	0.6123
GO:0019432	triglyceride biosynthetic process	11	1	0.91	1260	0.6123	0.6123
GO:0030725	germline ring canal formation	11	1	0.91	1261	0.6123	0.6123
GO:0035076	ecdysone receptor-mediated signaling pathway	11	1	0.91	1262	0.6123	0.6123
GO:0035290	trunk segmentation	11	1	0.91	1263	0.6123	0.6123
GO:0042417	dopamine metabolic process	11	1	0.91	1264	0.6123	0.6123
GO:0046426	negative regulation of JAK-STAT cascade	11	1	0.91	1265	0.6123	0.6123
GO:0046514	ceramide catabolic process	11	1	0.91	1266	0.6123	0.6123
GO:0051181	cofactor transport	11	1	0.91	1267	0.6123	0.6123
GO:0060964	regulation of gene silencing by miRNA	11	1	0.91	1268	0.6123	0.6123
GO:0061343	cell adhesion involved in heart morphogenesis	11	1	0.91	1269	0.6123	0.6123
GO:2000648	positive regulation of stem cell proliferation	11	1	0.91	1270	0.6123	0.6123
GO:0098656	anion transmembrane transport	70	5	5.77	1446	0.69569	0.61286
GO:0009880	embryonic pattern specification	185	13	15.26	1575	0.76753	0.61384
GO:0048585	negative regulation of response to stimulus	304	21	25.07	1757	0.83484	0.61507
GO:0006399	tRNA metabolic process	120	5	9.9	2172	0.97443	0.61552
GO:0006955	immune response	246	15	20.29	1973	0.91885	0.61584
GO:0042737	drug catabolic process	51	4	4.21	1285	0.61616	0.61616
GO:0006891	intra-Golgi vesicle-mediated transport	25	2	2.06	1293	0.62294	0.62294
GO:0007317	regulation of pole plasm oskar mRNA localization	25	2	2.06	1294	0.62294	0.62294
GO:0009306	protein secretion	66	4	5.44	1673	0.80519	0.6365
GO:0030010	establishment of cell polarity	48	6	3.96	621	0.20072	0.64303
GO:0019439	aromatic compound catabolic process	156	14	12.87	907	0.41129	0.6436
GO:0050832	defense response to fungus	39	4	3.22	858	0.40325	0.64366
GO:0051259	protein complex oligomerization	36	4	2.97	755	0.34535	0.64368
GO:0097194	execution phase of apoptosis	17	2	1.4	914	0.41495	0.64395
GO:0016476	regulation of embryonic cell shape	23	2	1.9	1177	0.57677	0.64427
GO:0000060	protein import into nucleus, translocation	12	1	0.99	1318	0.64433	0.64433
GO:0006623	protein targeting to vacuole	12	1	0.99	1319	0.64433	0.64433
GO:0006911	phagocytosis, engulfment	12	1	0.99	1320	0.64433	0.64433
GO:0007035	vacuolar acidification	12	1	0.99	1321	0.64433	0.64433
GO:0007193	adenylate cyclase-inhibiting G-protein coupled receptor signaling pathway	12	1	0.99	1322	0.64433	0.64433
GO:0007220	Notch receptor processing	12	1	0.99	1323	0.64433	0.64433
GO:0009047	dosage compensation by hyperactivation of X chromosome	12	1	0.99	1324	0.64433	0.64433
GO:0009855	determination of bilateral symmetry	12	1	0.99	1325	0.64433	0.64433
GO:0010165	response to X-ray	12	1	0.99	1326	0.64433	0.64433
GO:0032483	regulation of Rab protein signal transduction	12	1	0.99	1327	0.64433	0.64433
GO:0034097	response to cytokine	12	1	0.99	1328	0.64433	0.64433
GO:0035567	non-canonical Wnt signaling pathway	12	1	0.99	1329	0.64433	0.64433
GO:0045450	bicoid mRNA localization	12	1	0.99	1330	0.64433	0.64433
GO:0060261	positive regulation of transcription initiation from RNA polymerase II promoter	12	1	0.99	1331	0.64433	0.64433
GO:0071577	zinc ion transmembrane transport	12	1	0.99	1332	0.64433	0.64433
GO:0072375	medium-term memory	12	1	0.99	1333	0.64433	0.64433
GO:0006378	mRNA polyadenylation	26	2	2.14	1347	0.64452	0.64452
GO:0043954	cellular component maintenance	26	2	2.14	1348	0.64452	0.64452
GO:0032880	regulation of protein localization	77	6	6.35	1291	0.61873	0.64456
GO:0030155	regulation of cell adhesion	40	2	3.3	1802	0.85384	0.64517
GO:0043900	regulation of multi-organism process	116	8	9.57	1553	0.7516	0.64535
GO:0048569	post-embryonic animal organ development	369	28	30.43	1481	0.70991	0.64598
GO:0008593	regulation of Notch signaling pathway	95	11	7.84	557	0.15768	0.66195
GO:0032482	Rab protein signal transduction	39	3	3.22	1315	0.63508	0.66511
GO:0007494	midgut development	27	2	2.23	1367	0.66512	0.66512
GO:0030307	positive regulation of cell growth	40	3	3.3	1358	0.65233	0.66518
GO:0061077	chaperone-mediated protein folding	41	3	3.38	1375	0.66899	0.66899
GO:0051124	synaptic growth at neuromuscular junction	118	3	9.73	2336	0.99753	0.67116
GO:0031935	regulation of chromatin silencing	40	7	3.3	388	0.04286	0.6713
GO:0033365	protein localization to organelle	169	14	13.94	1105	0.53447	0.67363
GO:0002385	mucosal immune response	13	1	1.07	1380	0.67371	0.67371
GO:0006517	protein deglycosylation	13	1	1.07	1381	0.67371	0.67371
GO:0007204	positive regulation of cytosolic calcium ion concentration	13	1	1.07	1382	0.67371	0.67371
GO:0009084	glutamine family amino acid biosynthetic process	13	1	1.07	1383	0.67371	0.67371
GO:0010025	wax biosynthetic process	13	1	1.07	1384	0.67371	0.67371
GO:0034198	cellular response to amino acid starvation	13	1	1.07	1385	0.67371	0.67371
GO:0036098	male germ-line stem cell population maintenance	13	1	1.07	1386	0.67371	0.67371
GO:0045773	positive regulation of axon extension	13	1	1.07	1387	0.67371	0.67371
GO:0046173	polyol biosynthetic process	13	1	1.07	1388	0.67371	0.67371
GO:0010004	gastrulation involving germ band extension	29	2	2.39	1473	0.70341	0.67391
GO:0098655	cation transmembrane transport	138	3	11.38	2395	0.99943	0.67904
GO:0048468	cell development	1169	89	96.42	1711	0.82035	0.67926
GO:0007525	somatic muscle development	65	6	5.36	940	0.44999	0.68387
GO:0010033	response to organic substance	394	16	32.5	2413	0.99976	0.68454
GO:0051348	negative regulation of transferase activity	28	2	2.31	1419	0.68474	0.68474
GO:0090263	positive regulation of canonical Wnt signaling pathway	28	2	2.31	1420	0.68474	0.68474
GO:0008586	imaginal disc-derived wing vein morphogenesis	42	3	3.46	1431	0.68505	0.68505
GO:0007349	cellularization	81	6	6.68	1372	0.66806	0.68508
GO:0006915	apoptotic process	231	16	19.05	1670	0.80394	0.68732
GO:0007498	mesoderm development	75	6	6.19	1235	0.59258	0.69485
GO:0001708	cell fate specification	68	6	5.61	1024	0.49444	0.69949
GO:0035023	regulation of Rho protein signal transduction	30	4	2.47	654	0.2316	0.69961
GO:1902533	positive regulation of intracellular signal transduction	160	14	13.2	939	0.44955	0.70006
GO:0016246	RNA interference	30	3	2.47	999	0.45503	0.70024
GO:0072384	organelle transport along microtubule	24	2	1.98	1248	0.60035	0.70056
GO:0006182	cGMP biosynthetic process	14	1	1.15	1452	0.70067	0.70067
GO:0008594	photoreceptor cell morphogenesis	14	1	1.15	1453	0.70067	0.70067
GO:0030422	production of siRNA involved in RNA interference	14	1	1.15	1454	0.70067	0.70067
GO:0035336	long-chain fatty-acyl-CoA metabolic process	14	1	1.15	1455	0.70067	0.70067
GO:0038083	peptidyl-tyrosine autophosphorylation	14	1	1.15	1456	0.70067	0.70067
GO:2000243	positive regulation of reproductive process	14	1	1.15	1457	0.70067	0.70067
GO:0045732	positive regulation of protein catabolic process	40	3	3.3	1359	0.65233	0.70076
GO:0006405	RNA export from nucleus	61	4	5.03	1554	0.75255	0.70122
GO:0009952	anterior/posterior pattern specification	148	11	12.21	1434	0.686	0.70135
GO:0035006	melanization defense response	41	2	3.38	1826	0.86332	0.70144
GO:0007314	oocyte anterior/posterior axis specification	81	5	6.68	1699	0.80928	0.70164
GO:0035282	segmentation	198	13	16.33	1780	0.84261	0.70271
GO:0060322	head development	108	5	8.91	2064	0.95022	0.70305
GO:0007423	sensory organ development	383	26	31.59	1857	0.87939	0.70425
GO:0001700	embryonic development via the syncytial blastoderm	152	11	12.54	1488	0.71934	0.70446
GO:0006793	phosphorus metabolic process	857	60	70.68	2020	0.93275	0.70808
GO:0040011	locomotion	508	27	41.9	2324	0.99666	0.71045
GO:0010629	negative regulation of gene expression	472	59	38.93	220	0.00067	0.71949
GO:0006368	transcription elongation from RNA polymerase II promoter	30	2	2.47	1489	0.72115	0.72115
GO:2000241	regulation of reproductive process	71	12	5.86	317	0.01251	0.72142
GO:0007447	imaginal disc pattern formation	83	8	6.85	836	0.37698	0.72454
GO:0007009	plasma membrane organization	21	2	1.73	1092	0.52659	0.72509
GO:0061057	peptidoglycan recognition protein signaling pathway	22	2	1.81	1163	0.55218	0.72515
GO:0006730	one-carbon metabolic process	15	1	1.24	1495	0.72541	0.72541
GO:0006963	positive regulation of antibacterial peptide biosynthetic process	15	1	1.24	1496	0.72541	0.72541
GO:0007040	lysosome organization	15	1	1.24	1497	0.72541	0.72541
GO:0016063	rhodopsin biosynthetic process	15	1	1.24	1498	0.72541	0.72541
GO:0016239	positive regulation of macroautophagy	15	1	1.24	1499	0.72541	0.72541
GO:0016266	O-glycan processing	15	1	1.24	1500	0.72541	0.72541
GO:0035073	pupariation	15	1	1.24	1501	0.72541	0.72541
GO:0043524	negative regulation of neuron apoptotic process	15	1	1.24	1502	0.72541	0.72541
GO:0072523	purine-containing compound catabolic process	15	1	1.24	1503	0.72541	0.72541
GO:0007265	Ras protein signal transduction	185	15	15.26	1172	0.56763	0.72543
GO:0043902	positive regulation of multi-organism process	43	3	3.55	1448	0.70053	0.7256
GO:0019730	antimicrobial humoral response	73	4	6.02	1825	0.86322	0.72651
GO:0007350	blastoderm segmentation	169	11	13.94	1754	0.83462	0.72711
GO:0006351	transcription, DNA-templated	933	134	76.95	55	1.1e-11	0.72721
GO:0002164	larval development	130	7	10.72	1974	0.92028	0.72758
GO:0051603	proteolysis involved in cellular protein catabolic process	231	13	19.05	2069	0.95083	0.72908
GO:0006606	protein import into nucleus	57	4	4.7	1472	0.70305	0.72972
GO:0042752	regulation of circadian rhythm	62	3	5.11	1892	0.89586	0.73934
GO:0009953	dorsal/ventral pattern formation	129	12	10.64	834	0.37534	0.74708
GO:0048646	anatomical structure formation involved in morphogenesis	440	43	36.29	519	0.13431	0.74732
GO:0007224	smoothened signaling pathway	50	5	4.12	852	0.39632	0.74738
GO:0014070	response to organic cyclic compound	103	9	8.5	1019	0.47956	0.7476
GO:0051453	regulation of intracellular pH	32	3	2.64	1061	0.49854	0.74769
GO:0072659	protein localization to plasma membrane	32	3	2.64	1062	0.49854	0.74769
GO:0051260	protein homooligomerization	21	2	1.73	1093	0.52659	0.74775
GO:0007155	cell adhesion	158	8	13.03	2097	0.95542	0.74797
GO:0051346	negative regulation of hydrolase activity	39	3	3.22	1316	0.63508	0.74804
GO:0006555	methionine metabolic process	16	1	1.32	1529	0.7481	0.7481
GO:0007370	ventral furrow formation	16	1	1.32	1530	0.7481	0.7481
GO:0035212	cell competition in a multicellular organism	16	1	1.32	1531	0.7481	0.7481
GO:0042074	cell migration involved in gastrulation	16	1	1.32	1532	0.7481	0.7481
GO:0045476	nurse cell apoptotic process	16	1	1.32	1533	0.7481	0.7481
GO:0055070	copper ion homeostasis	16	1	1.32	1534	0.7481	0.7481
GO:0090175	regulation of establishment of planar polarity	16	1	1.32	1535	0.7481	0.7481
GO:0050770	regulation of axonogenesis	41	2	3.38	1827	0.86332	0.74874
GO:0006816	calcium ion transport	48	2	3.96	1952	0.91537	0.74909
GO:0009611	response to wounding	104	6	8.58	1833	0.869	0.74948
GO:0044087	regulation of cellular component biogenesis	269	17	22.19	1920	0.90444	0.75113
GO:0006820	anion transport	170	7	14.02	2249	0.98937	0.7522
GO:0003333	amino acid transmembrane transport	32	2	2.64	1559	0.75395	0.75395
GO:0006487	protein N-linked glycosylation	32	2	2.64	1560	0.75395	0.75395
GO:0006635	fatty acid beta-oxidation	32	2	2.64	1561	0.75395	0.75395
GO:0034599	cellular response to oxidative stress	32	2	2.64	1562	0.75395	0.75395
GO:0045214	sarcomere organization	32	2	2.64	1563	0.75395	0.75395
GO:0043436	oxoacid metabolic process	332	16	27.38	2289	0.99517	0.75499
GO:0048812	neuron projection morphogenesis	364	18	30.02	2298	0.99536	0.75542
GO:0071705	nitrogen compound transport	491	27	40.5	2276	0.99366	0.75648
GO:0042127	regulation of cell proliferation	192	18	15.84	728	0.319	0.76663
GO:0051017	actin filament bundle assembly	28	3	2.31	905	0.41002	0.76828
GO:0010951	negative regulation of endopeptidase activity	22	2	1.81	1164	0.55218	0.76858
GO:0006446	regulation of translational initiation	17	1	1.4	1578	0.76892	0.76892
GO:0007179	transforming growth factor beta receptor signaling pathway	17	1	1.4	1579	0.76892	0.76892
GO:0007469	antennal development	17	1	1.4	1580	0.76892	0.76892
GO:0009225	nucleotide-sugar metabolic process	17	1	1.4	1581	0.76892	0.76892
GO:0009312	oligosaccharide biosynthetic process	17	1	1.4	1582	0.76892	0.76892
GO:0035099	hemocyte migration	17	1	1.4	1583	0.76892	0.76892
GO:0042136	neurotransmitter biosynthetic process	17	1	1.4	1584	0.76892	0.76892
GO:0051123	RNA polymerase II transcriptional preinitiation complex assembly	17	1	1.4	1585	0.76892	0.76892
GO:0042067	establishment of ommatidial planar polarity	50	3	4.12	1652	0.79293	0.76935
GO:0007173	epidermal growth factor receptor signaling pathway	63	4	5.2	1612	0.77481	0.76939
GO:0007030	Golgi organization	77	5	6.35	1609	0.77253	0.77253
GO:0009887	animal organ morphogenesis	603	39	49.73	2116	0.96225	0.77797
GO:0035206	regulation of hemocyte proliferation	34	2	2.8	1619	0.78337	0.78337
GO:0035317	imaginal disc-derived wing hair organization	39	6	3.22	472	0.09778	0.78615
GO:0051494	negative regulation of cytoskeleton organization	29	3	2.39	929	0.43269	0.7874
GO:0048085	adult chitin-containing cuticle pigmentation	28	2	2.31	1421	0.68474	0.78793
GO:0006612	protein targeting to membrane	29	2	2.39	1474	0.70341	0.78797
GO:0006491	N-glycan processing	18	1	1.48	1630	0.78802	0.78802
GO:0007189	adenylate cyclase-activating G-protein coupled receptor signaling pathway	18	1	1.48	1631	0.78802	0.78802
GO:0007465	R7 cell fate commitment	18	1	1.48	1632	0.78802	0.78802
GO:0015748	organophosphate ester transport	18	1	1.48	1633	0.78802	0.78802
GO:0042753	positive regulation of circadian rhythm	18	1	1.48	1634	0.78802	0.78802
GO:0006874	cellular calcium ion homeostasis	38	2	3.13	1747	0.83306	0.7884
GO:0008354	germ cell migration	38	2	3.13	1748	0.83306	0.7884
GO:1990542	mitochondrial transmembrane transport	35	2	2.89	1659	0.79689	0.79689
GO:0030707	ovarian follicle cell development	282	27	23.26	655	0.23281	0.79947
GO:0030162	regulation of proteolysis	105	11	8.66	658	0.24661	0.80392
GO:0006379	mRNA cleavage	19	1	1.57	1675	0.80555	0.80555
GO:0007413	axonal fasciculation	19	1	1.57	1676	0.80555	0.80555
GO:0008362	chitin-based embryonic cuticle biosynthetic process	19	1	1.57	1677	0.80555	0.80555
GO:0042332	gravitaxis	19	1	1.57	1678	0.80555	0.80555
GO:0046165	alcohol biosynthetic process	32	2	2.64	1564	0.75395	0.80559
GO:0050829	defense response to Gram-negative bacterium	82	5	6.76	1710	0.81769	0.81769
GO:1901361	organic cyclic compound catabolic process	164	14	13.53	1023	0.48763	0.82103
GO:0007398	ectoderm development	25	2	2.06	1295	0.62294	0.82132
GO:0006006	glucose metabolic process	29	2	2.39	1475	0.70341	0.82149
GO:0032147	activation of protein kinase activity	29	2	2.39	1476	0.70341	0.82149
GO:0007280	pole cell migration	20	1	1.65	1712	0.82163	0.82163
GO:0007362	terminal region determination	20	1	1.65	1713	0.82163	0.82163
GO:0007390	germ-band shortening	20	1	1.65	1714	0.82163	0.82163
GO:0015918	sterol transport	20	1	1.65	1715	0.82163	0.82163
GO:0042331	phototaxis	20	1	1.65	1716	0.82163	0.82163
GO:0046580	negative regulation of Ras protein signal transduction	20	1	1.65	1717	0.82163	0.82163
GO:0006493	protein O-linked glycosylation	35	2	2.89	1660	0.79689	0.82176
GO:0006644	phospholipid metabolic process	122	8	10.06	1665	0.79918	0.8224
GO:0008361	regulation of cell size	86	5	7.09	1787	0.8484	0.82241
GO:0007446	imaginal disc growth	38	2	3.13	1749	0.83306	0.83306
GO:0031532	actin cytoskeleton reorganization	28	2	2.31	1422	0.68474	0.83617
GO:0000245	spliceosomal complex assembly	21	1	1.73	1758	0.83638	0.83638
GO:0010821	regulation of mitochondrion organization	21	1	1.73	1759	0.83638	0.83638
GO:0035050	embryonic heart tube development	21	1	1.73	1760	0.83638	0.83638
GO:0036011	imaginal disc-derived leg segmentation	21	1	1.73	1761	0.83638	0.83638
GO:0040018	positive regulation of multicellular organism growth	21	1	1.73	1762	0.83638	0.83638
GO:0046330	positive regulation of JNK cascade	21	1	1.73	1763	0.83638	0.83638
GO:0045451	pole plasm oskar mRNA localization	46	3	3.79	1522	0.74347	0.83642
GO:0044249	cellular biosynthetic process	1954	213	161.16	107	7.5e-07	0.83699
GO:0007613	memory	97	5	8	1945	0.91143	0.83756
GO:0006796	phosphate-containing compound metabolic process	815	58	67.22	1925	0.90737	0.84126
GO:0048519	negative regulation of biological process	1129	126	93.12	174	0.00012	0.84227
GO:0001709	cell fate determination	120	12	9.9	697	0.28493	0.84898
GO:1903827	regulation of cellular protein localization	43	3	3.55	1449	0.70053	0.84978
GO:0016318	ommatidial rotation	22	1	1.81	1788	0.84992	0.84992
GO:0030032	lamellipodium assembly	22	1	1.81	1789	0.84992	0.84992
GO:2000331	regulation of terminal button organization	22	1	1.81	1790	0.84992	0.84992
GO:0042048	olfactory behavior	60	2	4.95	2121	0.96399	0.85097
GO:0006418	tRNA aminoacylation for protein translation	40	2	3.3	1803	0.85384	0.85384
GO:0046579	positive regulation of Ras protein signal transduction	57	5	4.7	1074	0.51167	0.86223
GO:0033227	dsRNA transport	23	1	1.9	1813	0.86233	0.86233
GO:0048520	positive regulation of behavior	23	1	1.9	1814	0.86233	0.86233
GO:0046777	protein autophosphorylation	37	2	3.05	1732	0.82171	0.86241
GO:0048190	wing disc dorsal/ventral pattern formation	41	2	3.38	1828	0.86332	0.86332
GO:0000381	regulation of alternative mRNA splicing, via spliceosome	74	4	6.1	1834	0.87018	0.87018
GO:0030866	cortical actin cytoskeleton organization	51	7	4.21	512	0.1235	0.872
GO:0007608	sensory perception of smell	42	2	3.46	1839	0.87224	0.87224
GO:0008340	determination of adult lifespan	134	8	11.05	1842	0.87331	0.87331
GO:0008293	torso signaling pathway	24	1	1.98	1843	0.87372	0.87372
GO:0009612	response to mechanical stimulus	24	1	1.98	1844	0.87372	0.87372
GO:0017157	regulation of exocytosis	24	1	1.98	1845	0.87372	0.87372
GO:0046716	muscle cell cellular homeostasis	24	1	1.98	1846	0.87372	0.87372
GO:0098609	cell-cell adhesion	89	3	7.34	2201	0.98137	0.87525
GO:0008285	negative regulation of cell proliferation	79	7	6.52	1021	0.47981	0.87939
GO:0022411	cellular component disassembly	109	7	8.99	1695	0.80602	0.88089
GO:0009950	dorsal/ventral axis specification	70	9	5.77	508	0.11997	0.88229
GO:0007169	transmembrane receptor protein tyrosine kinase signaling pathway	155	8	12.78	2061	0.94879	0.88257
GO:0022416	chaeta development	60	3	4.95	1861	0.88274	0.88274
GO:0006904	vesicle docking involved in exocytosis	25	1	2.06	1863	0.88417	0.88417
GO:0042147	retrograde transport, endosome to Golgi	25	1	2.06	1864	0.88417	0.88417
GO:0045824	negative regulation of innate immune response	25	1	2.06	1865	0.88417	0.88417
GO:0045887	positive regulation of synaptic growth at neuromuscular junction	25	1	2.06	1866	0.88417	0.88417
GO:0050830	defense response to Gram-positive bacterium	25	1	2.06	1867	0.88417	0.88417
GO:0006464	cellular protein modification process	1011	97	83.38	403	0.05511	0.88655
GO:0008406	gonad development	44	2	3.63	1877	0.88848	0.88848
GO:0007480	imaginal disc-derived leg morphogenesis	65	3	5.36	1949	0.91308	0.8889
GO:0019233	sensory perception of pain	61	3	5.03	1882	0.88947	0.88947
GO:0051128	regulation of cellular component organization	675	61	55.67	656	0.23656	0.89082
GO:0005975	carbohydrate metabolic process	211	11	17.4	2137	0.96718	0.89241
GO:0070050	neuron cellular homeostasis	26	1	2.14	1887	0.89376	0.89376
GO:0007391	dorsal closure	95	5	7.84	1902	0.90204	0.90077
GO:0008347	glial cell migration	27	1	2.23	1903	0.90255	0.90255
GO:0010501	RNA secondary structure unwinding	27	1	2.23	1904	0.90255	0.90255
GO:0032456	endocytic recycling	27	1	2.23	1905	0.90255	0.90255
GO:0034620	cellular response to unfolded protein	27	1	2.23	1906	0.90255	0.90255
GO:0035011	melanotic encapsulation of foreign target	27	1	2.23	1907	0.90255	0.90255
GO:0016477	cell migration	266	12	21.94	2284	0.99459	0.90715
GO:0000902	cell morphogenesis	466	23	38.43	2358	0.99842	0.90836
GO:0016322	neuron remodeling	47	2	3.88	1932	0.90928	0.90928
GO:0045454	cell redox homeostasis	28	1	2.31	1936	0.91062	0.91062
GO:0045793	positive regulation of cell size	28	1	2.31	1937	0.91062	0.91062
GO:0070588	calcium ion transmembrane transport	28	1	2.31	1938	0.91062	0.91062
GO:0006470	protein dephosphorylation	84	6	6.93	1469	0.70229	0.91223
GO:0007616	long-term memory	65	3	5.36	1950	0.91308	0.91308
GO:0050877	nervous system process	365	13	30.1	2430	0.99993	0.91664
GO:0007591	molting cycle, chitin-based cuticle	81	6	6.68	1373	0.66806	0.91777
GO:0007156	homophilic cell adhesion via plasma membrane adhesion molecules	29	1	2.39	1963	0.91802	0.91802
GO:0007300	ovarian nurse cell to oocyte transport	29	1	2.39	1964	0.91802	0.91802
GO:0022410	circadian sleep/wake cycle process	29	1	2.39	1965	0.91802	0.91802
GO:0042742	defense response to bacterium	149	8	12.29	2021	0.93288	0.91907
GO:0045087	innate immune response	164	10	13.53	1858	0.87967	0.92178
GO:0007409	axonogenesis	271	9	22.35	2411	0.99975	0.92232
GO:0006090	pyruvate metabolic process	30	1	2.47	1983	0.92481	0.92481
GO:0007455	eye-antennal disc morphogenesis	30	1	2.47	1984	0.92481	0.92481
GO:0009166	nucleotide catabolic process	30	1	2.47	1985	0.92481	0.92481
GO:0021782	glial cell development	30	1	2.47	1986	0.92481	0.92481
GO:0033108	mitochondrial respiratory chain complex assembly	30	1	2.47	1987	0.92481	0.92481
GO:0035329	hippo signaling	30	1	2.47	1988	0.92481	0.92481
GO:0042749	regulation of circadian sleep/wake cycle	30	1	2.47	1989	0.92481	0.92481
GO:0007435	salivary gland morphogenesis	81	3	6.68	2140	0.96836	0.9271
GO:0007424	open tracheal system development	200	7	16.5	2348	0.99809	0.92817
GO:0044248	cellular catabolic process	696	40	57.4	2322	0.99658	0.93054
GO:0035070	salivary gland histolysis	31	1	2.56	2004	0.93103	0.93103
GO:0035159	regulation of tube length, open tracheal system	31	1	2.56	2005	0.93103	0.93103
GO:0042059	negative regulation of epidermal growth factor receptor signaling pathway	31	1	2.56	2006	0.93103	0.93103
GO:0043409	negative regulation of MAPK cascade	31	1	2.56	2007	0.93103	0.93103
GO:0046331	lateral inhibition	31	1	2.56	2008	0.93103	0.93103
GO:0065002	intracellular protein transmembrane transport	31	1	2.56	2009	0.93103	0.93103
GO:0006417	regulation of translation	144	10	11.88	1573	0.76039	0.93128
GO:0006839	mitochondrial transport	77	4	6.35	1879	0.88923	0.93129
GO:0010628	positive regulation of gene expression	373	39	30.76	441	0.07091	0.93154
GO:0051240	positive regulation of multicellular organismal process	179	12	14.76	1703	0.81369	0.93166
GO:0007417	central nervous system development	204	14	16.83	1669	0.80234	0.93169
GO:0016325	oocyte microtubule cytoskeleton organization	32	1	2.64	2030	0.93675	0.93675
GO:0018193	peptidyl-amino acid modification	282	34	23.26	335	0.01521	0.93819
GO:0006979	response to oxidative stress	103	5	8.5	2024	0.93503	0.94027
GO:0016485	protein processing	59	5	4.87	1151	0.54304	0.94145
GO:0016579	protein deubiquitination	41	3	3.38	1376	0.66899	0.9416
GO:0000045	autophagosome assembly	33	1	2.72	2041	0.94199	0.94199
GO:0007427	epithelial cell migration, open tracheal system	33	1	2.72	2042	0.94199	0.94199
GO:0042060	wound healing	77	5	6.35	1610	0.77253	0.94414
GO:0007166	cell surface receptor signaling pathway	565	41	46.6	1752	0.83411	0.94492
GO:0016192	vesicle-mediated transport	465	13	38.35	2452	1	0.94529
GO:0001510	RNA methylation	41	4	3.38	932	0.44135	0.94613
GO:0007291	sperm individualization	34	1	2.8	2049	0.94679	0.94679
GO:0008286	insulin receptor signaling pathway	34	1	2.8	2050	0.94679	0.94679
GO:0016203	muscle attachment	34	1	2.8	2051	0.94679	0.94679
GO:0006030	chitin metabolic process	56	2	4.62	2080	0.95193	0.95193
GO:0008045	motor neuron axon guidance	56	2	4.62	2081	0.95193	0.95193
GO:0008039	synaptic target recognition	36	1	2.97	2088	0.95525	0.95525
GO:0034332	adherens junction organization	36	1	2.97	2089	0.95525	0.95525
GO:0042052	rhabdomere development	36	1	2.97	2090	0.95525	0.95525
GO:0043547	positive regulation of GTPase activity	57	2	4.7	2096	0.95526	0.95526
GO:0001745	compound eye morphogenesis	247	16	20.37	1856	0.87673	0.95582
GO:0007163	establishment or maintenance of cell polarity	185	13	15.26	1576	0.76753	0.95901
GO:0006413	translational initiation	54	2	4.45	2046	0.94454	0.95905
GO:0007552	metamorphosis	374	27	30.85	1664	0.79725	0.9594
GO:0008360	regulation of cell shape	61	3	5.03	1883	0.88947	0.96234
GO:0006909	phagocytosis	50	2	4.12	1995	0.92641	0.96236
GO:0032273	positive regulation of protein polymerization	38	1	3.13	2117	0.96236	0.96236
GO:0006810	transport	1370	56	112.99	2463	1	0.96241
GO:0022618	ribonucleoprotein complex assembly	120	5	9.9	2173	0.97443	0.96296
GO:0009966	regulation of signal transduction	645	48	53.2	1668	0.80223	0.9631
GO:0006888	ER to Golgi vesicle-mediated transport	60	2	4.95	2122	0.96399	0.96399
GO:0030509	BMP signaling pathway	39	1	3.22	2126	0.96548	0.96548
GO:0008152	metabolic process	4473	397	368.92	296	0.00767	0.96801
GO:0042981	regulation of apoptotic process	180	13	14.85	1515	0.73296	0.96826
GO:0006749	glutathione metabolic process	40	1	3.3	2138	0.96834	0.96834
GO:0030431	sleep	62	2	5.11	2143	0.96887	0.96887
GO:1902905	positive regulation of supramolecular fiber organization	47	2	3.88	1933	0.90928	0.97088
GO:0008049	male courtship behavior	41	1	3.38	2149	0.97097	0.97097
GO:0000209	protein polyubiquitination	63	2	5.2	2156	0.97106	0.97106
GO:0006511	ubiquitin-dependent protein catabolic process	203	12	16.74	1972	0.91812	0.9714
GO:0009206	purine ribonucleoside triphosphate biosynthetic process	42	1	3.46	2163	0.97338	0.97338
GO:0009968	negative regulation of signal transduction	260	18	21.44	1708	0.81614	0.97504
GO:0007165	signal transduction	1242	80	102.44	2315	0.99615	0.97624
GO:0007476	imaginal disc-derived wing morphogenesis	220	17	18.14	1355	0.64862	0.97634
GO:0007520	myoblast fusion	44	1	3.63	2182	0.97761	0.97761
GO:0008587	imaginal disc-derived wing margin morphogenesis	44	1	3.63	2183	0.97761	0.97761
GO:0007015	actin filament organization	129	5	10.64	2221	0.98482	0.97806
GO:0035220	wing disc development	306	24	25.24	1314	0.63501	0.98097
GO:0001666	response to hypoxia	46	1	3.79	2196	0.98117	0.98117
GO:0006813	potassium ion transport	46	1	3.79	2197	0.98117	0.98117
GO:0009267	cellular response to starvation	59	2	4.87	2112	0.96128	0.98118
GO:0016311	dephosphorylation	135	7	11.13	2029	0.93672	0.98135
GO:0006400	tRNA modification	48	1	3.96	2216	0.98417	0.98417
GO:0031647	regulation of protein stability	48	1	3.96	2217	0.98417	0.98417
GO:0008344	adult locomotory behavior	64	3	5.28	1926	0.90765	0.9854
GO:0009156	ribonucleoside monophosphate biosynthetic process	50	1	4.12	2234	0.98669	0.98669
GO:0010506	regulation of autophagy	86	2	7.09	2287	0.99486	0.98688
GO:1901136	carbohydrate derivative catabolic process	62	2	5.11	2144	0.96887	0.98972
GO:0015711	organic anion transport	127	5	10.47	2211	0.98293	0.98991
GO:0042391	regulation of membrane potential	78	2	6.43	2258	0.99054	0.99054
GO:0032543	mitochondrial translation	102	3	8.41	2266	0.99233	0.99233
GO:0043161	proteasome-mediated ubiquitin-dependent protein catabolic process	159	11	13.11	1608	0.77202	0.99382
GO:0009152	purine ribonucleotide biosynthetic process	73	2	6.02	2232	0.98621	0.99391
GO:0046394	carboxylic acid biosynthetic process	100	2	8.25	2350	0.99826	0.99403
GO:0007298	border follicle cell migration	106	3	8.74	2279	0.9942	0.9942
GO:0048640	negative regulation of developmental growth	69	5	5.69	1417	0.68338	0.99424
GO:0006906	vesicle fusion	60	1	4.95	2280	0.99441	0.99441
GO:1901565	organonitrogen compound catabolic process	388	23	32	2145	0.9689	0.99512
GO:0046907	intracellular transport	553	24	45.61	2431	0.99994	0.99529
GO:0016319	mushroom body development	63	1	5.2	2306	0.99569	0.99569
GO:0022904	respiratory electron transport chain	65	1	5.36	2318	0.99638	0.99638
GO:0097305	response to alcohol	108	4	8.91	2204	0.98175	0.9964
GO:0032504	multicellular organism reproduction	898	91	74.06	344	0.0185	0.99698
GO:0006457	protein folding	112	4	9.24	2230	0.98578	0.99786
GO:0007186	G-protein coupled receptor signaling pathway	136	5	11.22	2256	0.99	0.99797
GO:0007600	sensory perception	206	6	16.99	2404	0.9996	0.99816
GO:0009108	coenzyme biosynthetic process	73	1	6.02	2349	0.99819	0.99819
GO:0007411	axon guidance	211	7	17.4	2378	0.99901	0.99834
GO:0007005	mitochondrion organization	160	4	13.2	2396	0.99943	0.99842
GO:0035556	intracellular signal transduction	572	37	47.18	2104	0.95817	0.99844
GO:0006886	intracellular protein transport	310	14	25.57	2331	0.99692	0.99871
GO:0055114	oxidation-reduction process	433	17	35.71	2427	0.99992	0.99877
GO:0046034	ATP metabolic process	105	2	8.66	2373	0.99882	0.99882
GO:0006897	endocytosis	181	5	14.93	2398	0.99944	0.99907
GO:0060627	regulation of vesicle-mediated transport	112	2	9.24	2390	0.99932	0.99952
GO:0065008	regulation of biological quality	1049	47	86.52	2455	1	0.99973
GO:0055085	transmembrane transport	447	12	36.87	2453	1	0.99998
GO:0042493	response to drug	140	4	11.55	2342	0.99772	0.99998
GO:0006508	proteolysis	573	30	47.26	2363	0.99849	0.99999
GO:0007268	chemical synaptic transmission	234	2	19.3	2457	1	1
GO:0000003	reproduction	994	115	81.98	163	5.4e-05	1
GO:0000041	transition metal ion transport	29	1	2.39	1966	0.91802	1
GO:0000096	sulfur amino acid metabolic process	19	1	1.57	1679	0.80555	1
GO:0000165	MAPK cascade	149	10	12.29	1657	0.79611	1
GO:0000271	polysaccharide biosynthetic process	16	1	1.32	1536	0.7481	1
GO:0000280	nuclear division	262	83	21.61	6	4.6e-29	1
GO:0000288	nuclear-transcribed mRNA catabolic process, deadenylation-dependent decay	27	4	2.23	586	0.17875	1
GO:0000337	regulation of transposition, DNA-mediated	6	1	0.49	891	0.40349	1
GO:0000375	RNA splicing, via transesterification reactions	226	19	18.64	1072	0.50081	1
GO:0000377	RNA splicing, via transesterification reactions with bulged adenosine as nucleophile	226	19	18.64	1073	0.50081	1
GO:0000380	alternative mRNA splicing, via spliceosome	74	4	6.1	1835	0.87018	1
GO:0000394	RNA splicing, via endonucleolytic cleavage and ligation	9	1	0.74	1128	0.53936	1
GO:0000459	exonucleolytic trimming involved in rRNA processing	5	1	0.41	809	0.34982	1
GO:0000460	maturation of 5.8S rRNA	24	1	1.98	1847	0.87372	1
GO:0000466	maturation of 5.8S rRNA from tricistronic rRNA transcript (SSU-rRNA, 5.8S rRNA, LSU-rRNA)	13	1	1.07	1389	0.67371	1
GO:0000469	cleavage involved in rRNA processing	19	1	1.57	1680	0.80555	1
GO:0000725	recombinational repair	38	14	3.13	109	8.7e-07	1
GO:0000768	syncytium formation by plasma membrane fusion	44	1	3.63	2184	0.97761	1
GO:0000819	sister chromatid segregation	109	45	8.99	19	2.3e-21	1
GO:0000904	cell morphogenesis involved in differentiation	386	19	31.84	2321	0.99651	1
GO:0000912	assembly of actomyosin apparatus involved in cytokinesis	20	5	1.65	354	0.02053	1
GO:0000956	nuclear-transcribed mRNA catabolic process	54	4	4.45	1363	0.66149	1
GO:0000959	mitochondrial RNA metabolic process	21	1	1.73	1764	0.83638	1
GO:0001505	regulation of neurotransmitter levels	110	3	9.07	2305	0.99563	1
GO:0001558	regulation of cell growth	68	3	5.61	1998	0.92767	1
GO:0001654	eye development	322	22	26.56	1800	0.85357	1
GO:0001655	urogenital system development	59	5	4.87	1152	0.54304	1
GO:0001667	ameboidal-type cell migration	160	5	13.2	2343	0.99776	1
GO:0001703	gastrulation with mouth forming first	29	2	2.39	1477	0.70341	1
GO:0001704	formation of primary germ layer	24	1	1.98	1848	0.87372	1
GO:0001736	establishment of planar polarity	88	7	7.26	1236	0.59684	1
GO:0001752	compound eye photoreceptor fate commitment	45	2	3.71	1893	0.89586	1
GO:0001754	eye photoreceptor cell differentiation	145	10	11.96	1577	0.76787	1
GO:0001775	cell activation	11	3	0.91	414	0.05587	1
GO:0001933	negative regulation of protein phosphorylation	62	1	5.11	2293	0.9953	1
GO:0001934	positive regulation of protein phosphorylation	132	12	10.89	902	0.40635	1
GO:0002065	columnar/cuboidal epithelial cell differentiation	288	27	23.75	678	0.26823	1
GO:0002066	columnar/cuboidal epithelial cell development	283	27	23.34	657	0.23856	1
GO:0002165	instar larval or pupal development	444	28	36.62	2082	0.95203	1
GO:0002168	instar larval development	60	3	4.95	1862	0.88274	1
GO:0002218	activation of innate immune response	16	1	1.32	1537	0.7481	1
GO:0002221	pattern recognition receptor signaling pathway	10	1	0.82	1207	0.5774	1
GO:0002224	toll-like receptor signaling pathway	9	1	0.74	1129	0.53936	1
GO:0002225	positive regulation of antimicrobial peptide production	25	2	2.06	1296	0.62294	1
GO:0002237	response to molecule of bacterial origin	13	1	1.07	1390	0.67371	1
GO:0002251	organ or tissue specific immune response	13	1	1.07	1391	0.67371	1
GO:0002252	immune effector process	107	4	8.83	2195	0.98058	1
GO:0002253	activation of immune response	17	1	1.4	1586	0.76892	1
GO:0002376	immune system process	373	23	30.76	2063	0.94959	1
GO:0002440	production of molecular mediator of immune response	42	3	3.46	1432	0.68505	1
GO:0002520	immune system development	82	7	6.76	1086	0.52011	1
GO:0002683	negative regulation of immune system process	52	4	4.29	1311	0.63168	1
GO:0002684	positive regulation of immune system process	74	6	6.1	1222	0.57916	1
GO:0002697	regulation of immune effector process	52	3	4.29	1705	0.81453	1
GO:0002698	negative regulation of immune effector process	5	1	0.41	810	0.34982	1
GO:0002699	positive regulation of immune effector process	25	2	2.06	1297	0.62294	1
GO:0002700	regulation of production of molecular mediator of immune response	40	3	3.3	1360	0.65233	1
GO:0002702	positive regulation of production of molecular mediator of immune response	25	2	2.06	1298	0.62294	1
GO:0002755	MyD88-dependent toll-like receptor signaling pathway	8	1	0.66	1048	0.49791	1
GO:0002757	immune response-activating signal transduction	13	1	1.07	1392	0.67371	1
GO:0002758	innate immune response-activating signal transduction	13	1	1.07	1393	0.67371	1
GO:0002759	regulation of antimicrobial humoral response	44	3	3.63	1483	0.71542	1
GO:0002760	positive regulation of antimicrobial humoral response	25	2	2.06	1299	0.62294	1
GO:0002764	immune response-regulating signaling pathway	16	1	1.32	1538	0.7481	1
GO:0002775	antimicrobial peptide production	41	2	3.38	1829	0.86332	1
GO:0002777	antimicrobial peptide biosynthetic process	31	2	2.56	1519	0.73799	1
GO:0002778	antibacterial peptide production	18	1	1.48	1635	0.78802	1
GO:0002780	antibacterial peptide biosynthetic process	18	1	1.48	1636	0.78802	1
GO:0002781	antifungal peptide production	10	2	0.82	609	0.19701	1
GO:0002783	antifungal peptide biosynthetic process	7	2	0.58	494	0.10805	1
GO:0002784	regulation of antimicrobial peptide production	39	2	3.22	1781	0.84377	1
GO:0002786	regulation of antibacterial peptide production	18	1	1.48	1637	0.78802	1
GO:0002788	regulation of antifungal peptide production	10	2	0.82	610	0.19701	1
GO:0002790	peptide secretion	72	4	5.94	1808	0.85596	1
GO:0002791	regulation of peptide secretion	25	1	2.06	1868	0.88417	1
GO:0002793	positive regulation of peptide secretion	13	1	1.07	1394	0.67371	1
GO:0002803	positive regulation of antibacterial peptide production	15	1	1.24	1504	0.72541	1
GO:0002804	positive regulation of antifungal peptide production	10	2	0.82	611	0.19701	1
GO:0002805	regulation of antimicrobial peptide biosynthetic process	31	2	2.56	1520	0.73799	1
GO:0002807	positive regulation of antimicrobial peptide biosynthetic process	21	2	1.73	1094	0.52659	1
GO:0002808	regulation of antibacterial peptide biosynthetic process	18	1	1.48	1638	0.78802	1
GO:0002810	regulation of antifungal peptide biosynthetic process	7	2	0.58	495	0.10805	1
GO:0002831	regulation of response to biotic stimulus	64	4	5.28	1627	0.78533	1
GO:0002832	negative regulation of response to biotic stimulus	14	2	1.15	732	0.32324	1
GO:0002833	positive regulation of response to biotic stimulus	28	2	2.31	1423	0.68474	1
GO:0002920	regulation of humoral immune response	45	3	3.71	1513	0.72973	1
GO:0002921	negative regulation of humoral immune response	9	1	0.74	1130	0.53936	1
GO:0002922	positive regulation of humoral immune response	25	2	2.06	1300	0.62294	1
GO:0003002	regionalization	372	33	30.68	831	0.35462	1
GO:0003006	developmental process involved in reproduction	699	67	57.65	473	0.102	1
GO:0003007	heart morphogenesis	33	1	2.72	2043	0.94199	1
GO:0003008	system process	450	15	37.11	2444	1	1
GO:0003012	muscle system process	32	1	2.64	2031	0.93675	1
GO:0003013	circulatory system process	38	1	3.13	2118	0.96236	1
GO:0003015	heart process	35	1	2.89	2070	0.9512	1
GO:0003156	regulation of animal organ formation	9	1	0.74	1131	0.53936	1
GO:0003381	epithelial cell morphogenesis involved in gastrulation	10	1	0.82	1208	0.5774	1
GO:0003382	epithelial cell morphogenesis	23	1	1.9	1815	0.86233	1
GO:0003383	apical constriction	17	1	1.4	1587	0.76892	1
GO:0005976	polysaccharide metabolic process	35	1	2.89	2071	0.9512	1
GO:0005984	disaccharide metabolic process	10	1	0.82	1209	0.5774	1
GO:0005996	monosaccharide metabolic process	49	3	4.04	1617	0.78137	1
GO:0006022	aminoglycan metabolic process	82	2	6.76	2271	0.99302	1
GO:0006029	proteoglycan metabolic process	18	1	1.48	1639	0.78802	1
GO:0006040	amino sugar metabolic process	67	3	5.53	1977	0.92307	1
GO:0006066	alcohol metabolic process	61	3	5.03	1884	0.88947	1
GO:0006082	organic acid metabolic process	334	16	27.55	2303	0.99558	1
GO:0006091	generation of precursor metabolites and energy	151	3	12.45	2418	0.99978	1
GO:0006101	citrate metabolic process	32	3	2.64	1063	0.49854	1
GO:0006164	purine nucleotide biosynthetic process	75	2	6.19	2240	0.98813	1
GO:0006213	pyrimidine nucleoside metabolic process	9	1	0.74	1132	0.53936	1
GO:0006220	pyrimidine nucleotide metabolic process	13	2	1.07	707	0.29173	1
GO:0006221	pyrimidine nucleotide biosynthetic process	13	2	1.07	708	0.29173	1
GO:0006259	DNA metabolic process	283	108	23.34	1	< 1e-30	1
GO:0006278	RNA-dependent DNA biosynthetic process	5	1	0.41	811	0.34982	1
GO:0006301	postreplication repair	11	4	0.91	307	0.00945	1
GO:0006304	DNA modification	8	3	0.66	359	0.02283	1
GO:0006323	DNA packaging	86	38	7.09	23	1.9e-19	1
GO:0006346	methylation-dependent chromatin silencing	8	2	0.66	533	0.13646	1
GO:0006352	DNA-templated transcription, initiation	85	9	7.01	677	0.26567	1
GO:0006354	DNA-templated transcription, elongation	34	2	2.8	1620	0.78337	1
GO:0006356	regulation of transcription by RNA polymerase I	6	1	0.49	892	0.40349	1
GO:0006360	transcription by RNA polymerase I	13	1	1.07	1395	0.67371	1
GO:0006364	rRNA processing	132	1	10.89	2441	0.99999	1
GO:0006397	mRNA processing	278	22	22.93	1284	0.61462	1
GO:0006403	RNA localization	166	15	13.69	849	0.39487	1
GO:0006406	mRNA export from nucleus	33	3	2.72	1077	0.51963	1
GO:0006412	translation	396	15	32.66	2425	0.99991	1
GO:0006473	protein acetylation	79	16	6.52	212	0.0006	1
GO:0006475	internal protein amino acid acetylation	75	16	6.19	197	0.00032	1
GO:0006476	protein deacetylation	13	2	1.07	709	0.29173	1
GO:0006482	protein demethylation	8	2	0.66	534	0.13646	1
GO:0006486	protein glycosylation	80	3	6.6	2130	0.96623	1
GO:0006497	protein lipidation	54	6	4.45	695	0.28458	1
GO:0006505	GPI anchor metabolic process	28	5	2.31	445	0.07578	1
GO:0006518	peptide metabolic process	497	19	40.99	2440	0.99998	1
GO:0006520	cellular amino acid metabolic process	145	7	11.96	2111	0.9609	1
GO:0006575	cellular modified amino acid metabolic process	63	1	5.2	2307	0.99569	1
GO:0006576	cellular biogenic amine metabolic process	17	1	1.4	1588	0.76892	1
GO:0006582	melanin metabolic process	49	2	4.04	1975	0.92107	1
GO:0006605	protein targeting	84	4	6.93	1981	0.92446	1
GO:0006611	protein export from nucleus	56	3	4.62	1798	0.85202	1
GO:0006613	cotranslational protein targeting to membrane	11	1	0.91	1271	0.6123	1
GO:0006626	protein targeting to mitochondrion	29	1	2.39	1967	0.91802	1
GO:0006629	lipid metabolic process	386	14	31.84	2432	0.99994	1
GO:0006631	fatty acid metabolic process	91	4	7.51	2062	0.94928	1
GO:0006637	acyl-CoA metabolic process	34	1	2.8	2052	0.94679	1
GO:0006638	neutral lipid metabolic process	31	1	2.56	2010	0.93103	1
GO:0006639	acylglycerol metabolic process	31	1	2.56	2011	0.93103	1
GO:0006641	triglyceride metabolic process	28	1	2.31	1939	0.91062	1
GO:0006643	membrane lipid metabolic process	89	6	7.34	1557	0.75387	1
GO:0006650	glycerophospholipid metabolic process	81	5	6.68	1700	0.80928	1
GO:0006661	phosphatidylinositol biosynthetic process	35	5	2.89	555	0.15762	1
GO:0006664	glycolipid metabolic process	50	6	4.12	636	0.22767	1
GO:0006665	sphingolipid metabolic process	54	1	4.45	2260	0.99059	1
GO:0006672	ceramide metabolic process	20	1	1.65	1718	0.82163	1
GO:0006687	glycosphingolipid metabolic process	17	1	1.4	1589	0.76892	1
GO:0006725	cellular aromatic compound metabolic process	2055	275	169.49	18	7.7e-22	1
GO:0006726	eye pigment biosynthetic process	34	1	2.8	2053	0.94679	1
GO:0006732	coenzyme metabolic process	120	2	9.9	2407	0.99964	1
GO:0006753	nucleoside phosphate metabolic process	197	9	16.25	2223	0.98532	1
GO:0006766	vitamin metabolic process	12	1	0.99	1334	0.64433	1
GO:0006767	water-soluble vitamin metabolic process	10	1	0.82	1210	0.5774	1
GO:0006790	sulfur compound metabolic process	128	3	10.56	2372	0.9988	1
GO:0006811	ion transport	377	10	31.09	2448	1	1
GO:0006812	cation transport	209	4	17.24	2439	0.99998	1
GO:0006821	chloride transport	33	2	2.72	1602	0.76907	1
GO:0006829	zinc ion transport	12	1	0.99	1335	0.64433	1
GO:0006865	amino acid transport	39	2	3.22	1782	0.84377	1
GO:0006869	lipid transport	58	2	4.78	2105	0.95837	1
GO:0006873	cellular ion homeostasis	106	6	8.74	1859	0.8803	1
GO:0006875	cellular metal ion homeostasis	69	3	5.69	2019	0.93201	1
GO:0006882	cellular zinc ion homeostasis	9	1	0.74	1133	0.53936	1
GO:0006885	regulation of pH	33	3	2.72	1078	0.51963	1
GO:0006887	exocytosis	78	1	6.43	2374	0.99883	1
GO:0006892	post-Golgi vesicle-mediated transport	27	3	2.23	845	0.38708	1
GO:0006893	Golgi to plasma membrane transport	14	2	1.15	733	0.32324	1
GO:0006914	autophagy	140	3	11.55	2400	0.99951	1
GO:0006928	movement of cell or subcellular component	532	37	43.88	1876	0.88838	1
GO:0006935	chemotaxis	233	10	19.22	2282	0.99452	1
GO:0006936	muscle contraction	23	1	1.9	1816	0.86233	1
GO:0006949	syncytium formation	44	1	3.63	2185	0.97761	1
GO:0006950	response to stress	956	106	78.85	211	0.00059	1
GO:0006952	defense response	298	14	24.58	2283	0.99458	1
GO:0006959	humoral immune response	85	4	7.01	2002	0.92857	1
GO:0006986	response to unfolded protein	29	1	2.39	1968	0.91802	1
GO:0006996	organelle organization	1453	202	119.84	31	1.2e-16	1
GO:0007010	cytoskeleton organization	500	67	41.24	153	3.4e-05	1
GO:0007028	cytoplasm organization	68	3	5.61	1999	0.92767	1
GO:0007033	vacuole organization	50	2	4.12	1996	0.92641	1
GO:0007034	vacuolar transport	42	1	3.46	2164	0.97338	1
GO:0007049	cell cycle	646	152	53.28	3	< 1e-30	1
GO:0007093	mitotic cell cycle checkpoint	42	17	3.46	81	1.1e-08	1
GO:0007127	meiosis I	50	22	4.12	54	9.7e-12	1
GO:0007154	cell communication	1452	84	119.76	2435	0.99997	1
GO:0007162	negative regulation of cell adhesion	14	1	1.15	1458	0.70067	1
GO:0007164	establishment of tissue polarity	88	7	7.26	1237	0.59684	1
GO:0007167	enzyme linked receptor protein signaling pathway	217	9	17.9	2285	0.99473	1
GO:0007178	transmembrane receptor protein serine/threonine kinase signaling pathway	62	1	5.11	2294	0.9953	1
GO:0007187	G-protein coupled receptor signaling pathway, coupled to cyclic nucleotide second messenger	33	3	2.72	1079	0.51963	1
GO:0007259	JAK-STAT cascade	37	3	3.05	1241	0.59884	1
GO:0007267	cell-cell signaling	391	15	32.25	2422	0.99989	1
GO:0007276	gamete generation	759	89	62.6	190	0.00028	1
GO:0007281	germ cell development	621	60	51.22	479	0.10496	1
GO:0007286	spermatid development	60	5	4.95	1168	0.55837	1
GO:0007292	female gamete generation	608	74	50.15	195	0.00031	1
GO:0007293	germarium-derived egg chamber formation	89	9	7.34	721	0.31159	1
GO:0007297	ovarian follicle cell migration	118	3	9.73	2337	0.99753	1
GO:0007308	oocyte construction	121	9	9.98	1414	0.67644	1
GO:0007309	oocyte axis specification	118	9	9.73	1354	0.64679	1
GO:0007315	pole plasm assembly	61	3	5.03	1885	0.88947	1
GO:0007316	pole plasm RNA localization	50	3	4.12	1653	0.79293	1
GO:0007351	tripartite regional subdivision	114	6	9.4	1961	0.91762	1
GO:0007354	zygotic determination of anterior/posterior axis, embryo	24	1	1.98	1849	0.87372	1
GO:0007365	periodic partitioning	36	3	2.97	1223	0.57985	1
GO:0007389	pattern specification process	403	35	33.24	855	0.39868	1
GO:0007392	initiation of dorsal closure	16	1	1.32	1539	0.7481	1
GO:0007414	axonal defasciculation	9	1	0.74	1134	0.53936	1
GO:0007416	synapse assembly	149	3	12.29	2410	0.99975	1
GO:0007431	salivary gland development	109	4	8.99	2209	0.98285	1
GO:0007432	salivary gland boundary specification	20	1	1.65	1719	0.82163	1
GO:0007439	ectodermal digestive tract development	8	1	0.66	1049	0.49791	1
GO:0007442	hindgut morphogenesis	46	5	3.79	739	0.32891	1
GO:0007448	anterior/posterior pattern specification, imaginal disc	16	1	1.32	1540	0.7481	1
GO:0007450	dorsal/ventral pattern formation, imaginal disc	45	2	3.71	1894	0.89586	1
GO:0007478	leg disc morphogenesis	67	3	5.53	1978	0.92307	1
GO:0007492	endoderm development	6	1	0.49	893	0.40349	1
GO:0007517	muscle organ development	76	1	6.27	2368	0.99861	1
GO:0007528	neuromuscular junction development	150	3	12.37	2415	0.99977	1
GO:0007548	sex differentiation	80	2	6.6	2264	0.99187	1
GO:0007560	imaginal disc morphogenesis	312	25	25.73	1233	0.59249	1
GO:0007564	regulation of chitin-based cuticle tanning	10	1	0.82	1211	0.5774	1
GO:0007568	aging	140	9	11.55	1743	0.82702	1
GO:0007593	chitin-based cuticle sclerotization	29	2	2.39	1478	0.70341	1
GO:0007606	sensory perception of chemical stimulus	75	2	6.19	2241	0.98813	1
GO:0007610	behavior	423	9	34.89	2462	1	1
GO:0007611	learning or memory	139	6	11.46	2179	0.97714	1
GO:0007612	learning	57	1	4.7	2267	0.99275	1
GO:0007617	mating behavior	71	1	5.86	2344	0.99785	1
GO:0007618	mating	75	1	6.19	2359	0.99848	1
GO:0007619	courtship behavior	50	1	4.12	2235	0.98669	1
GO:0007622	rhythmic behavior	86	1	7.09	2394	0.99942	1
GO:0007623	circadian rhythm	129	3	10.64	2375	0.99889	1
GO:0007626	locomotory behavior	144	3	11.88	2406	0.99963	1
GO:0007635	chemosensory behavior	64	2	5.28	2160	0.97311	1
GO:0008015	blood circulation	28	1	2.31	1940	0.91062	1
GO:0008016	regulation of heart contraction	20	1	1.65	1720	0.82163	1
GO:0008033	tRNA processing	71	2	5.86	2215	0.98398	1
GO:0008037	cell recognition	87	2	7.18	2290	0.99524	1
GO:0008038	neuron recognition	85	2	7.01	2281	0.99445	1
GO:0008052	sensory organ boundary specification	15	4	1.24	374	0.03002	1
GO:0008150	biological_process	7299	602	602	2464	1	1
GO:0008213	protein alkylation	69	7	5.69	752	0.34161	1
GO:0008214	protein dealkylation	8	2	0.66	535	0.13646	1
GO:0008272	sulfate transport	10	1	0.82	1212	0.5774	1
GO:0008306	associative learning	48	1	3.96	2218	0.98417	1
GO:0008334	histone mRNA metabolic process	7	2	0.58	496	0.10805	1
GO:0008355	olfactory learning	38	1	3.13	2119	0.96236	1
GO:0008358	maternal determination of anterior/posterior axis, embryo	84	5	6.93	1751	0.83362	1
GO:0008363	larval chitin-based cuticle development	22	3	1.81	683	0.27078	1
GO:0008544	epidermis development	50	6	4.12	637	0.22767	1
GO:0008582	regulation of synaptic growth at neuromuscular junction	91	1	7.51	2405	0.99962	1
GO:0008592	regulation of Toll signaling pathway	21	1	1.73	1765	0.83638	1
GO:0008595	anterior/posterior axis specification, embryo	114	6	9.4	1962	0.91762	1
GO:0008610	lipid biosynthetic process	167	9	13.77	2038	0.94083	1
GO:0008652	cellular amino acid biosynthetic process	41	1	3.38	2150	0.97097	1
GO:0009056	catabolic process	768	46	63.34	2286	0.99484	1
GO:0009057	macromolecule catabolic process	399	30	32.91	1516	0.73368	1
GO:0009058	biosynthetic process	2009	214	165.7	126	4.2e-06	1
GO:0009059	macromolecule biosynthetic process	1569	199	129.41	52	4.2e-12	1
GO:0009060	aerobic respiration	43	3	3.55	1450	0.70053	1
GO:0009063	cellular amino acid catabolic process	39	2	3.22	1783	0.84377	1
GO:0009064	glutamine family amino acid metabolic process	28	2	2.31	1424	0.68474	1
GO:0009066	aspartate family amino acid metabolic process	28	1	2.31	1941	0.91062	1
GO:0009069	serine family amino acid metabolic process	22	2	1.81	1165	0.55218	1
GO:0009100	glycoprotein metabolic process	119	5	9.81	2158	0.97293	1
GO:0009101	glycoprotein biosynthetic process	95	4	7.84	2108	0.95986	1
GO:0009110	vitamin biosynthetic process	7	1	0.58	971	0.45272	1
GO:0009117	nucleotide metabolic process	195	9	16.08	2214	0.9838	1
GO:0009119	ribonucleoside metabolic process	31	1	2.56	2012	0.93103	1
GO:0009123	nucleoside monophosphate metabolic process	123	3	10.14	2353	0.99828	1
GO:0009124	nucleoside monophosphate biosynthetic process	54	1	4.45	2261	0.99059	1
GO:0009126	purine nucleoside monophosphate metabolic process	113	2	9.32	2391	0.99938	1
GO:0009129	pyrimidine nucleoside monophosphate metabolic process	7	1	0.58	972	0.45272	1
GO:0009132	nucleoside diphosphate metabolic process	23	2	1.9	1178	0.57677	1
GO:0009141	nucleoside triphosphate metabolic process	115	4	9.48	2243	0.98824	1
GO:0009142	nucleoside triphosphate biosynthetic process	43	1	3.55	2176	0.97558	1
GO:0009145	purine nucleoside triphosphate biosynthetic process	42	1	3.46	2165	0.97338	1
GO:0009150	purine ribonucleotide metabolic process	149	4	12.29	2371	0.99877	1
GO:0009161	ribonucleoside monophosphate metabolic process	119	3	9.81	2341	0.9977	1
GO:0009163	nucleoside biosynthetic process	20	1	1.65	1721	0.82163	1
GO:0009165	nucleotide biosynthetic process	98	5	8.08	1959	0.91582	1
GO:0009167	purine ribonucleoside monophosphate metabolic process	113	2	9.32	2392	0.99938	1
GO:0009187	cyclic nucleotide metabolic process	22	1	1.81	1791	0.84992	1
GO:0009190	cyclic nucleotide biosynthetic process	17	1	1.4	1590	0.76892	1
GO:0009199	ribonucleoside triphosphate metabolic process	111	3	9.15	2311	0.99592	1
GO:0009201	ribonucleoside triphosphate biosynthetic process	42	1	3.46	2166	0.97338	1
GO:0009205	purine ribonucleoside triphosphate metabolic process	111	3	9.15	2312	0.99592	1
GO:0009218	pyrimidine ribonucleotide metabolic process	7	2	0.58	497	0.10805	1
GO:0009247	glycolipid biosynthetic process	39	5	3.22	627	0.21564	1
GO:0009259	ribonucleotide metabolic process	154	5	12.7	2327	0.99672	1
GO:0009260	ribonucleotide biosynthetic process	78	3	6.43	2113	0.96155	1
GO:0009262	deoxyribonucleotide metabolic process	9	3	0.74	380	0.03218	1
GO:0009266	response to temperature stimulus	105	8	8.66	1353	0.64535	1
GO:0009308	amine metabolic process	21	1	1.73	1766	0.83638	1
GO:0009309	amine biosynthetic process	7	1	0.58	973	0.45272	1
GO:0009311	oligosaccharide metabolic process	25	2	2.06	1301	0.62294	1
GO:0009409	response to cold	10	3	0.82	394	0.04321	1
GO:0009410	response to xenobiotic stimulus	29	2	2.39	1479	0.70341	1
GO:0009416	response to light stimulus	127	5	10.47	2212	0.98293	1
GO:0009451	RNA modification	88	6	7.26	1526	0.74411	1
GO:0009453	energy taxis	20	1	1.65	1722	0.82163	1
GO:0009605	response to external stimulus	721	29	59.47	2449	1	1
GO:0009607	response to biotic stimulus	269	12	22.19	2295	0.99532	1
GO:0009617	response to bacterium	170	9	14.02	2059	0.94808	1
GO:0009620	response to fungus	49	4	4.04	1228	0.58392	1
GO:0009628	response to abiotic stimulus	350	27	28.87	1411	0.67418	1
GO:0009629	response to gravity	19	1	1.57	1681	0.80555	1
GO:0009636	response to toxic substance	122	1	10.06	2436	0.99997	1
GO:0009653	anatomical structure morphogenesis	1229	90	101.36	1947	0.91283	1
GO:0009712	catechol-containing compound metabolic process	14	2	1.15	734	0.32324	1
GO:0009713	catechol-containing compound biosynthetic process	5	1	0.41	812	0.34982	1
GO:0009719	response to endogenous stimulus	184	6	15.18	2354	0.99836	1
GO:0009725	response to hormone	108	5	8.91	2065	0.95022	1
GO:0009743	response to carbohydrate	17	1	1.4	1591	0.76892	1
GO:0009755	hormone-mediated signaling pathway	35	1	2.89	2072	0.9512	1
GO:0009790	embryo development	445	40	36.7	718	0.30371	1
GO:0009791	post-embryonic development	502	31	41.4	2148	0.97053	1
GO:0009792	embryo development ending in birth or egg hatching	157	11	12.95	1572	0.75772	1
GO:0009798	axis specification	176	13	14.52	1471	0.70303	1
GO:0009799	specification of symmetry	12	1	0.99	1336	0.64433	1
GO:0009826	unidimensional cell growth	21	1	1.73	1767	0.83638	1
GO:0009886	post-embryonic animal morphogenesis	369	26	30.43	1745	0.8307	1
GO:0009889	regulation of biosynthetic process	1065	151	87.84	44	9.2e-13	1
GO:0009890	negative regulation of biosynthetic process	364	56	30.02	119	2.7e-06	1
GO:0009891	positive regulation of biosynthetic process	385	40	31.75	443	0.07347	1
GO:0009892	negative regulation of metabolic process	628	73	51.8	236	0.00131	1
GO:0009893	positive regulation of metabolic process	647	67	53.36	369	0.02724	1
GO:0009894	regulation of catabolic process	169	8	13.94	2169	0.97364	1
GO:0009896	positive regulation of catabolic process	78	6	6.43	1310	0.63144	1
GO:0009913	epidermal cell differentiation	42	6	3.46	515	0.12827	1
GO:0009948	anterior/posterior axis specification	123	9	10.14	1444	0.69535	1
GO:0009967	positive regulation of signal transduction	292	27	24.08	713	0.29297	1
GO:0009987	cellular process	5560	503	458.57	120	2.7e-06	1
GO:0009991	response to extracellular stimulus	126	7	10.39	1921	0.90457	1
GO:0009994	oocyte differentiation	155	12	12.78	1313	0.63465	1
GO:0010001	glial cell differentiation	35	1	2.89	2073	0.9512	1
GO:0010035	response to inorganic substance	45	1	3.71	2191	0.97947	1
GO:0010038	response to metal ion	33	1	2.72	2044	0.94199	1
GO:0010043	response to zinc ion	11	1	0.91	1272	0.6123	1
GO:0010160	formation of animal organ boundary	35	5	2.89	556	0.15762	1
GO:0010166	wax metabolic process	13	1	1.07	1396	0.67371	1
GO:0010243	response to organonitrogen compound	102	5	8.41	2017	0.93154	1
GO:0010256	endomembrane system organization	142	9	11.71	1778	0.83913	1
GO:0010324	membrane invagination	18	1	1.48	1640	0.78802	1
GO:0010453	regulation of cell fate commitment	28	3	2.31	906	0.41002	1
GO:0010454	negative regulation of cell fate commitment	18	3	1.48	590	0.18124	1
GO:0010458	exit from mitosis	12	2	0.99	668	0.26004	1
GO:0010466	negative regulation of peptidase activity	23	2	1.9	1179	0.57677	1
GO:0010467	gene expression	1866	190	153.9	200	0.00033	1
GO:0010498	proteasomal protein catabolic process	169	11	13.94	1755	0.83462	1
GO:0010508	positive regulation of autophagy	28	1	2.31	1942	0.91062	1
GO:0010528	regulation of transposition	15	3	1.24	511	0.12085	1
GO:0010556	regulation of macromolecule biosynthetic process	1026	149	84.62	38	1.8e-13	1
GO:0010557	positive regulation of macromolecule biosynthetic process	356	38	29.36	430	0.05777	1
GO:0010558	negative regulation of macromolecule biosynthetic process	353	56	29.11	111	1e-06	1
GO:0010562	positive regulation of phosphorus metabolic process	146	13	12.04	924	0.42888	1
GO:0010563	negative regulation of phosphorus metabolic process	74	3	6.1	2067	0.95033	1
GO:0010604	positive regulation of macromolecule metabolic process	595	64	49.07	324	0.01465	1
GO:0010605	negative regulation of macromolecule metabolic process	594	72	48.99	205	0.00043	1
GO:0010608	posttranscriptional regulation of gene expression	171	13	14.1	1365	0.66292	1
GO:0010623	programmed cell death involved in cell development	92	2	7.59	2329	0.99676	1
GO:0010631	epithelial cell migration	146	4	12.04	2361	0.99849	1
GO:0010638	positive regulation of organelle organization	125	12	10.31	744	0.3345	1
GO:0010639	negative regulation of organelle organization	80	15	6.6	250	0.00199	1
GO:0010646	regulation of cell communication	724	49	59.71	2058	0.94778	1
GO:0010647	positive regulation of cell communication	311	28	25.65	747	0.34008	1
GO:0010648	negative regulation of cell communication	278	18	22.93	1880	0.88931	1
GO:0010720	positive regulation of cell development	82	4	6.76	1958	0.91559	1
GO:0010721	negative regulation of cell development	67	7	5.53	722	0.31424	1
GO:0010769	regulation of cell morphogenesis involved in differentiation	64	2	5.28	2161	0.97311	1
GO:0010770	positive regulation of cell morphogenesis involved in differentiation	24	1	1.98	1850	0.87372	1
GO:0010833	telomere maintenance via telomere lengthening	5	1	0.41	813	0.34982	1
GO:0010847	regulation of chromatin assembly	12	4	0.99	322	0.01327	1
GO:0010876	lipid localization	100	2	8.25	2351	0.99826	1
GO:0010927	cellular component assembly involved in morphogenesis	125	15	10.31	467	0.08944	1
GO:0010942	positive regulation of cell death	72	5	5.94	1487	0.7193	1
GO:0010950	positive regulation of endopeptidase activity	22	4	1.81	475	0.10223	1
GO:0010965	regulation of mitotic sister chromatid separation	30	7	2.47	312	0.00954	1
GO:0010970	transport along microtubule	52	3	4.29	1706	0.81453	1
GO:0010972	negative regulation of G2/M transition of mitotic cell cycle	17	8	1.4	149	2.5e-05	1
GO:0010975	regulation of neuron projection development	80	2	6.6	2265	0.99187	1
GO:0010976	positive regulation of neuron projection development	30	1	2.47	1990	0.92481	1
GO:0012501	programmed cell death	291	16	24	2162	0.9733	1
GO:0014706	striated muscle tissue development	22	1	1.81	1792	0.84992	1
GO:0014902	myotube differentiation	47	1	3.88	2207	0.98273	1
GO:0015012	heparan sulfate proteoglycan biosynthetic process	13	1	1.07	1397	0.67371	1
GO:0015672	monovalent inorganic cation transport	97	1	8	2416	0.99978	1
GO:0015698	inorganic anion transport	40	2	3.3	1804	0.85384	1
GO:0015718	monocarboxylic acid transport	22	1	1.81	1793	0.84992	1
GO:0015833	peptide transport	386	20	31.84	2274	0.99338	1
GO:0015849	organic acid transport	65	3	5.36	1951	0.91308	1
GO:0015850	organic hydroxy compound transport	26	1	2.14	1888	0.89376	1
GO:0015908	fatty acid transport	8	1	0.66	1050	0.49791	1
GO:0015909	long-chain fatty acid transport	6	1	0.49	894	0.40349	1
GO:0015931	nucleobase-containing compound transport	114	8	9.4	1517	0.7341	1
GO:0015980	energy derivation by oxidation of organic compounds	120	3	9.9	2345	0.99786	1
GO:0016042	lipid catabolic process	96	5	7.92	1924	0.90684	1
GO:0016043	cellular component organization	2219	234	183.02	118	2.3e-06	1
GO:0016049	cell growth	137	4	11.3	2335	0.99721	1
GO:0016050	vesicle organization	108	2	8.91	2379	0.99907	1
GO:0016051	carbohydrate biosynthetic process	47	4	3.88	1158	0.55017	1
GO:0016052	carbohydrate catabolic process	39	3	3.22	1317	0.63508	1
GO:0016053	organic acid biosynthetic process	100	2	8.25	2352	0.99826	1
GO:0016054	organic acid catabolic process	86	6	7.09	1492	0.72375	1
GO:0016070	RNA metabolic process	1519	179	125.28	83	4e-08	1
GO:0016071	mRNA metabolic process	338	27	27.88	1250	0.6006	1
GO:0016072	rRNA metabolic process	140	2	11.55	2429	0.99993	1
GO:0016073	snRNA metabolic process	35	7	2.89	355	0.02204	1
GO:0016074	snoRNA metabolic process	9	1	0.74	1135	0.53936	1
GO:0016197	endosomal transport	87	2	7.18	2291	0.99524	1
GO:0016236	macroautophagy	70	2	5.77	2208	0.98274	1
GO:0016241	regulation of macroautophagy	24	1	1.98	1851	0.87372	1
GO:0016310	phosphorylation	503	39	41.49	1435	0.6866	1
GO:0016331	morphogenesis of embryonic epithelium	108	5	8.91	2066	0.95022	1
GO:0016333	morphogenesis of follicular epithelium	46	2	3.79	1917	0.90279	1
GO:0016358	dendrite development	139	11	11.46	1254	0.60301	1
GO:0016441	posttranscriptional gene silencing	53	5	4.37	937	0.44654	1
GO:0016482	cytosolic transport	53	1	4.37	2250	0.98974	1
GO:0016556	mRNA modification	11	3	0.91	415	0.05587	1
GO:0016569	covalent chromatin modification	176	31	14.52	154	3.7e-05	1
GO:0016570	histone modification	172	30	14.19	166	6e-05	1
GO:0016571	histone methylation	61	6	5.03	848	0.38959	1
GO:0016577	histone demethylation	7	2	0.58	498	0.10805	1
GO:0016999	antibiotic metabolic process	47	4	3.88	1159	0.55017	1
GO:0017038	protein import	81	4	6.68	1944	0.91081	1
GO:0017144	drug metabolic process	275	11	22.68	2364	0.99853	1
GO:0017145	stem cell division	84	13	6.93	345	0.01934	1
GO:0018022	peptidyl-lysine methylation	46	5	3.79	740	0.32891	1
GO:0018108	peptidyl-tyrosine phosphorylation	29	1	2.39	1969	0.91802	1
GO:0018130	heterocycle biosynthetic process	1147	152	94.6	66	1.8e-10	1
GO:0018198	peptidyl-cysteine modification	13	1	1.07	1398	0.67371	1
GO:0018205	peptidyl-lysine modification	133	24	10.97	184	0.00019	1
GO:0018208	peptidyl-proline modification	23	2	1.9	1180	0.57677	1
GO:0018209	peptidyl-serine modification	49	5	4.04	838	0.37945	1
GO:0018210	peptidyl-threonine modification	22	3	1.81	684	0.27078	1
GO:0018212	peptidyl-tyrosine modification	30	1	2.47	1991	0.92481	1
GO:0018231	peptidyl-S-diacylglycerol-L-cysteine biosynthetic process from peptidyl-cysteine	10	1	0.82	1213	0.5774	1
GO:0018345	protein palmitoylation	16	1	1.32	1541	0.7481	1
GO:0018393	internal peptidyl-lysine acetylation	75	16	6.19	198	0.00032	1
GO:0018394	peptidyl-lysine acetylation	75	16	6.19	199	0.00032	1
GO:0018904	ether metabolic process	7	2	0.58	499	0.10805	1
GO:0018958	phenol-containing compound metabolic process	61	4	5.03	1555	0.75255	1
GO:0019094	pole plasm mRNA localization	50	3	4.12	1654	0.79293	1
GO:0019098	reproductive behavior	84	1	6.93	2388	0.99931	1
GO:0019219	regulation of nucleobase-containing compound metabolic process	1015	152	83.71	34	6.3e-15	1
GO:0019220	regulation of phosphate metabolic process	254	18	20.95	1625	0.78528	1
GO:0019222	regulation of metabolic process	1646	196	135.76	74	2.4e-09	1
GO:0019318	hexose metabolic process	42	2	3.46	1840	0.87224	1
GO:0019319	hexose biosynthetic process	9	1	0.74	1136	0.53936	1
GO:0019377	glycolipid catabolic process	9	1	0.74	1137	0.53936	1
GO:0019400	alditol metabolic process	8	1	0.66	1051	0.49791	1
GO:0019438	aromatic compound biosynthetic process	1143	153	94.27	65	6.8e-11	1
GO:0019538	protein metabolic process	1877	134	154.81	2205	0.98205	1
GO:0019637	organophosphate metabolic process	339	17	27.96	2270	0.993	1
GO:0019692	deoxyribose phosphate metabolic process	6	1	0.49	895	0.40349	1
GO:0019693	ribose phosphate metabolic process	159	5	13.11	2339	0.99761	1
GO:0019722	calcium-mediated signaling	17	1	1.4	1592	0.76892	1
GO:0019725	cellular homeostasis	190	10	15.67	2103	0.95787	1
GO:0019731	antibacterial humoral response	27	1	2.23	1908	0.90255	1
GO:0019732	antifungal humoral response	13	2	1.07	710	0.29173	1
GO:0019748	secondary metabolic process	82	2	6.76	2272	0.99302	1
GO:0019751	polyol metabolic process	30	2	2.47	1490	0.72115	1
GO:0019752	carboxylic acid metabolic process	316	15	26.06	2288	0.9951	1
GO:0019827	stem cell population maintenance	81	8	6.68	823	0.3513	1
GO:0019932	second-messenger-mediated signaling	53	3	4.37	1740	0.82459	1
GO:0019933	cAMP-mediated signaling	25	1	2.06	1869	0.88417	1
GO:0019935	cyclic-nucleotide-mediated signaling	34	2	2.8	1621	0.78337	1
GO:0019941	modification-dependent protein catabolic process	206	12	16.99	1997	0.9268	1
GO:0019953	sexual reproduction	829	93	68.37	227	0.00091	1
GO:0021700	developmental maturation	205	12	16.91	1979	0.924	1
GO:0022402	cell cycle process	482	131	39.75	2	< 1e-30	1
GO:0022404	molting cycle process	48	2	3.96	1953	0.91537	1
GO:0022406	membrane docking	28	2	2.31	1425	0.68474	1
GO:0022407	regulation of cell-cell adhesion	25	1	2.06	1870	0.88417	1
GO:0022408	negative regulation of cell-cell adhesion	11	1	0.91	1273	0.6123	1
GO:0022412	cellular process involved in reproduction in multicellular organism	726	86	59.88	188	0.00025	1
GO:0022414	reproductive process	924	114	76.21	121	2.9e-06	1
GO:0022603	regulation of anatomical structure morphogenesis	198	15	16.33	1412	0.67441	1
GO:0022604	regulation of cell morphogenesis	115	5	9.48	2129	0.9661	1
GO:0022607	cellular component assembly	945	86	77.94	579	0.16869	1
GO:0022610	biological adhesion	159	8	13.11	2102	0.95745	1
GO:0022612	gland morphogenesis	81	3	6.68	2141	0.96836	1
GO:0022613	ribonucleoprotein complex biogenesis	272	6	22.43	2443	1	1
GO:0022616	DNA strand elongation	15	6	1.24	224	0.0008	1
GO:0022900	electron transport chain	68	1	5.61	2334	0.99721	1
GO:0023014	signal transduction by protein phosphorylation	151	10	12.45	1698	0.80926	1
GO:0023051	regulation of signaling	730	49	60.21	2087	0.95464	1
GO:0023056	positive regulation of signaling	311	28	25.65	748	0.34008	1
GO:0023057	negative regulation of signaling	278	18	22.93	1881	0.88931	1
GO:0023061	signal release	105	1	8.66	2423	0.99989	1
GO:0030001	metal ion transport	140	3	11.55	2401	0.99951	1
GO:0030003	cellular cation homeostasis	102	6	8.41	1809	0.85682	1
GO:0030004	cellular monovalent inorganic cation homeostasis	37	3	3.05	1242	0.59884	1
GO:0030029	actin filament-based process	250	18	20.62	1574	0.76283	1
GO:0030030	cell projection organization	496	31	40.91	2125	0.96479	1
GO:0030031	cell projection assembly	101	9	8.33	1000	0.45562	1
GO:0030036	actin cytoskeleton organization	238	17	19.63	1604	0.76915	1
GO:0030038	contractile actin filament bundle assembly	7	1	0.58	974	0.45272	1
GO:0030048	actin filament-based movement	26	1	2.14	1889	0.89376	1
GO:0030149	sphingolipid catabolic process	16	1	1.32	1542	0.7481	1
GO:0030166	proteoglycan biosynthetic process	18	1	1.48	1641	0.78802	1
GO:0030178	negative regulation of Wnt signaling pathway	29	4	2.39	624	0.21355	1
GO:0030201	heparan sulfate proteoglycan metabolic process	13	1	1.07	1399	0.67371	1
GO:0030239	myofibril assembly	42	2	3.46	1841	0.87224	1
GO:0030258	lipid modification	78	3	6.43	2114	0.96155	1
GO:0030516	regulation of axon extension	20	1	1.65	1723	0.82163	1
GO:0030518	intracellular steroid hormone receptor signaling pathway	14	1	1.15	1459	0.70067	1
GO:0030522	intracellular receptor signaling pathway	21	1	1.73	1768	0.83638	1
GO:0030534	adult behavior	124	3	10.23	2355	0.9984	1
GO:0030588	pseudocleavage	10	1	0.82	1214	0.5774	1
GO:0030641	regulation of cellular pH	33	3	2.72	1080	0.51963	1
GO:0030703	eggshell formation	107	18	8.83	262	0.00266	1
GO:0030716	oocyte fate determination	34	3	2.8	1147	0.54023	1
GO:0030855	epithelial cell differentiation	347	33	28.62	628	0.21588	1
GO:0030859	polarized epithelial cell differentiation	10	1	0.82	1215	0.5774	1
GO:0030865	cortical cytoskeleton organization	60	7	4.95	633	0.22287	1
GO:0031032	actomyosin structure organization	86	9	7.09	689	0.27696	1
GO:0031033	myosin filament organization	13	1	1.07	1400	0.67371	1
GO:0031038	myosin II filament organization	8	1	0.66	1052	0.49791	1
GO:0031047	gene silencing by RNA	64	5	5.28	1288	0.61697	1
GO:0031050	dsRNA fragmentation	21	2	1.73	1095	0.52659	1
GO:0031056	regulation of histone modification	45	7	3.71	442	0.07343	1
GO:0031099	regeneration	23	1	1.9	1817	0.86233	1
GO:0031109	microtubule polymerization or depolymerization	37	9	3.05	261	0.00253	1
GO:0031110	regulation of microtubule polymerization or depolymerization	18	4	1.48	407	0.05533	1
GO:0031111	negative regulation of microtubule polymerization or depolymerization	11	2	0.91	646	0.22838	1
GO:0031123	RNA 3'-end processing	70	7	5.77	833	0.35541	1
GO:0031124	mRNA 3'-end processing	40	3	3.3	1361	0.65233	1
GO:0031125	rRNA 3'-end processing	10	1	0.82	1216	0.5774	1
GO:0031175	neuron projection development	388	18	32	2356	0.99841	1
GO:0031323	regulation of cellular metabolic process	1501	183	123.8	72	1.6e-09	1
GO:0031324	negative regulation of cellular metabolic process	510	65	42.06	185	0.00021	1
GO:0031325	positive regulation of cellular metabolic process	609	64	50.23	360	0.02318	1
GO:0031326	regulation of cellular biosynthetic process	1060	151	87.43	43	6.2e-13	1
GO:0031327	negative regulation of cellular biosynthetic process	362	56	29.86	117	2.3e-06	1
GO:0031328	positive regulation of cellular biosynthetic process	385	40	31.75	444	0.07347	1
GO:0031329	regulation of cellular catabolic process	148	6	12.21	2231	0.9861	1
GO:0031331	positive regulation of cellular catabolic process	64	5	5.28	1289	0.61697	1
GO:0031344	regulation of cell projection organization	110	2	9.07	2385	0.99921	1
GO:0031345	negative regulation of cell projection organization	14	1	1.15	1460	0.70067	1
GO:0031346	positive regulation of cell projection organization	52	1	4.29	2246	0.98881	1
GO:0031347	regulation of defense response	115	8	9.48	1521	0.74295	1
GO:0031348	negative regulation of defense response	32	1	2.64	2032	0.93675	1
GO:0031349	positive regulation of defense response	66	6	5.44	1004	0.46492	1
GO:0031396	regulation of protein ubiquitination	27	3	2.23	846	0.38708	1
GO:0031399	regulation of protein modification process	296	30	24.41	539	0.13713	1
GO:0031400	negative regulation of protein modification process	84	6	6.93	1470	0.70229	1
GO:0031497	chromatin assembly	40	15	3.3	98	2.7e-07	1
GO:0031503	protein-containing complex localization	66	5	5.44	1344	0.64449	1
GO:0031570	DNA integrity checkpoint	37	15	3.05	87	7.9e-08	1
GO:0031572	G2 DNA damage checkpoint	11	4	0.91	308	0.00945	1
GO:0031644	regulation of neurological system process	13	1	1.07	1401	0.67371	1
GO:0031667	response to nutrient levels	124	7	10.23	1891	0.89578	1
GO:0031668	cellular response to extracellular stimulus	63	2	5.2	2157	0.97106	1
GO:0031669	cellular response to nutrient levels	61	2	5.03	2134	0.96651	1
GO:0031929	TOR signaling	56	4	4.62	1441	0.68962	1
GO:0032006	regulation of TOR signaling	41	3	3.38	1377	0.66899	1
GO:0032007	negative regulation of TOR signaling	13	1	1.07	1402	0.67371	1
GO:0032008	positive regulation of TOR signaling	28	2	2.31	1426	0.68474	1
GO:0032101	regulation of response to external stimulus	112	5	9.24	2109	0.95997	1
GO:0032102	negative regulation of response to external stimulus	20	2	1.65	1069	0.50004	1
GO:0032103	positive regulation of response to external stimulus	43	3	3.55	1451	0.70053	1
GO:0032119	sequestering of zinc ion	5	1	0.41	814	0.34982	1
GO:0032196	transposition	16	4	1.32	383	0.03749	1
GO:0032200	telomere organization	29	11	2.39	136	9.6e-06	1
GO:0032259	methylation	114	11	9.4	746	0.33865	1
GO:0032268	regulation of cellular protein metabolic process	514	49	42.39	553	0.15491	1
GO:0032269	negative regulation of cellular protein metabolic process	189	15	15.59	1251	0.60196	1
GO:0032270	positive regulation of cellular protein metabolic process	246	26	20.29	503	0.11197	1
GO:0032271	regulation of protein polymerization	57	1	4.7	2268	0.99275	1
GO:0032309	icosanoid secretion	5	1	0.41	815	0.34982	1
GO:0032392	DNA geometric change	11	2	0.91	647	0.22838	1
GO:0032434	regulation of proteasomal ubiquitin-dependent protein catabolic process	24	2	1.98	1249	0.60035	1
GO:0032446	protein modification by small protein conjugation	168	15	13.86	910	0.41329	1
GO:0032501	multicellular organismal process	2542	193	209.66	2036	0.93794	1
GO:0032506	cytokinetic process	33	6	2.72	402	0.0501	1
GO:0032535	regulation of cellular component size	150	6	12.37	2236	0.98758	1
GO:0032787	monocarboxylic acid metabolic process	130	4	10.72	2301	0.99556	1
GO:0032868	response to insulin	41	1	3.38	2151	0.97097	1
GO:0032869	cellular response to insulin stimulus	39	1	3.22	2127	0.96548	1
GO:0032872	regulation of stress-activated MAPK cascade	53	1	4.37	2251	0.98974	1
GO:0032874	positive regulation of stress-activated MAPK cascade	23	1	1.9	1818	0.86233	1
GO:0032879	regulation of localization	351	11	28.95	2438	0.99998	1
GO:0032886	regulation of microtubule-based process	44	11	3.63	222	0.00068	1
GO:0032984	protein-containing complex disassembly	66	5	5.44	1345	0.64449	1
GO:0032989	cellular component morphogenesis	570	37	47.01	2098	0.95588	1
GO:0032990	cell part morphogenesis	374	18	30.85	2333	0.99701	1
GO:0033036	macromolecule localization	725	50	59.8	2015	0.93122	1
GO:0033043	regulation of organelle organization	355	50	29.28	173	0.0001	1
GO:0033044	regulation of chromosome organization	133	27	10.97	132	8.5e-06	1
GO:0033046	negative regulation of sister chromatid segregation	18	4	1.48	408	0.05533	1
GO:0033048	negative regulation of mitotic sister chromatid segregation	15	4	1.24	375	0.03002	1
GO:0033059	cellular pigmentation	10	1	0.82	1217	0.5774	1
GO:0033206	meiotic cytokinesis	34	6	2.8	416	0.05678	1
GO:0033301	cell cycle comprising mitosis without cytokinesis	24	8	1.98	206	0.00046	1
GO:0033500	carbohydrate homeostasis	35	1	2.89	2074	0.9512	1
GO:0033554	cellular response to stress	492	80	40.58	70	1.1e-09	1
GO:0033692	cellular polysaccharide biosynthetic process	16	1	1.32	1543	0.7481	1
GO:0034121	regulation of toll-like receptor signaling pathway	7	1	0.58	975	0.45272	1
GO:0034123	positive regulation of toll-like receptor signaling pathway	7	1	0.58	976	0.45272	1
GO:0034124	regulation of MyD88-dependent toll-like receptor signaling pathway	7	1	0.58	977	0.45272	1
GO:0034220	ion transmembrane transport	213	7	17.57	2381	0.99913	1
GO:0034248	regulation of cellular amide metabolic process	181	12	14.93	1742	0.82509	1
GO:0034249	negative regulation of cellular amide metabolic process	78	7	6.43	1005	0.46616	1
GO:0034250	positive regulation of cellular amide metabolic process	53	2	4.37	2037	0.94046	1
GO:0034330	cell junction organization	76	1	6.27	2369	0.99861	1
GO:0034401	chromatin organization involved in regulation of transcription	22	6	1.81	294	0.00728	1
GO:0034404	nucleobase-containing small molecule biosynthetic process	52	2	4.29	2025	0.93608	1
GO:0034440	lipid oxidation	36	3	2.97	1224	0.57985	1
GO:0034470	ncRNA processing	226	9	18.64	2328	0.99675	1
GO:0034502	protein localization to chromosome	11	2	0.91	648	0.22838	1
GO:0034605	cellular response to heat	27	1	2.23	1909	0.90255	1
GO:0034613	cellular protein localization	440	27	36.29	2123	0.96431	1
GO:0034622	cellular protein-containing complex assembly	379	30	31.26	1306	0.6239	1
GO:0034641	cellular nitrogen compound metabolic process	2354	282	194.15	33	4.8e-15	1
GO:0034645	cellular macromolecule biosynthetic process	1546	198	127.51	46	1.9e-12	1
GO:0034654	nucleobase-containing compound biosynthetic process	1091	152	89.98	51	3.2e-12	1
GO:0034655	nucleobase-containing compound catabolic process	141	13	11.63	837	0.37926	1
GO:0034660	ncRNA metabolic process	295	19	24.33	1896	0.89963	1
GO:0034661	ncRNA catabolic process	15	1	1.24	1505	0.72541	1
GO:0034724	DNA replication-independent nucleosome organization	7	3	0.58	334	0.01518	1
GO:0034728	nucleosome organization	48	16	3.96	106	7e-07	1
GO:0034982	mitochondrial protein processing	6	1	0.49	896	0.40349	1
GO:0035010	encapsulation of foreign target	36	1	2.97	2091	0.95525	1
GO:0035039	male pronucleus assembly	9	1	0.74	1138	0.53936	1
GO:0035089	establishment of apical/basal cell polarity	11	1	0.91	1274	0.6123	1
GO:0035107	appendage morphogenesis	262	19	21.61	1571	0.75689	1
GO:0035114	imaginal disc-derived appendage morphogenesis	260	19	21.44	1528	0.7452	1
GO:0035120	post-embryonic appendage morphogenesis	256	18	21.11	1656	0.79594	1
GO:0035150	regulation of tube size	48	1	3.96	2219	0.98417	1
GO:0035151	regulation of tube size, open tracheal system	46	1	3.79	2198	0.98117	1
GO:0035152	regulation of tube architecture, open tracheal system	76	1	6.27	2370	0.99861	1
GO:0035162	embryonic hemopoiesis	21	1	1.73	1769	0.83638	1
GO:0035166	post-embryonic hemopoiesis	36	1	2.97	2092	0.95525	1
GO:0035167	larval lymph gland hemopoiesis	36	1	2.97	2093	0.95525	1
GO:0035168	larval lymph gland hemocyte differentiation	13	1	1.07	1403	0.67371	1
GO:0035171	lamellocyte differentiation	12	1	0.99	1337	0.64433	1
GO:0035194	posttranscriptional gene silencing by RNA	51	5	4.21	909	0.41314	1
GO:0035195	gene silencing by miRNA	30	2	2.47	1491	0.72115	1
GO:0035196	production of miRNAs involved in gene silencing by miRNA	16	1	1.32	1544	0.7481	1
GO:0035203	regulation of lamellocyte differentiation	8	1	0.66	1053	0.49791	1
GO:0035210	prepupal development	17	1	1.4	1593	0.76892	1
GO:0035218	leg disc development	79	3	6.52	2120	0.96396	1
GO:0035239	tube morphogenesis	396	29	32.66	1616	0.78011	1
GO:0035265	organ growth	61	2	5.03	2135	0.96651	1
GO:0035272	exocrine system development	109	4	8.99	2210	0.98285	1
GO:0035285	appendage segmentation	21	1	1.73	1770	0.83638	1
GO:0035295	tube development	568	46	46.85	1221	0.57768	1
GO:0035303	regulation of dephosphorylation	17	2	1.4	915	0.41495	1
GO:0035305	negative regulation of dephosphorylation	11	1	0.91	1275	0.6123	1
GO:0035315	hair cell differentiation	40	6	3.3	482	0.10747	1
GO:0035316	non-sensory hair organization	40	6	3.3	483	0.10747	1
GO:0035337	fatty-acyl-CoA metabolic process	16	1	1.32	1545	0.7481	1
GO:0035383	thioester metabolic process	34	1	2.8	2054	0.94679	1
GO:0035601	protein deacylation	16	2	1.32	843	0.38499	1
GO:0035825	homologous recombination	28	11	2.31	129	6.4e-06	1
GO:0035966	response to topologically incorrect protein	35	2	2.89	1661	0.79689	1
GO:0035967	cellular response to topologically incorrect protein	33	2	2.72	1603	0.76907	1
GO:0036211	protein modification process	1011	97	83.38	404	0.05511	1
GO:0036213	contractile ring contraction	8	2	0.66	536	0.13646	1
GO:0036270	response to diuretic	9	2	0.74	577	0.16625	1
GO:0036293	response to decreased oxygen levels	49	1	4.04	2224	0.98548	1
GO:0036314	response to sterol	40	3	3.3	1362	0.65233	1
GO:0036315	cellular response to sterol	17	1	1.4	1594	0.76892	1
GO:0036445	neuronal stem cell division	39	4	3.22	859	0.40325	1
GO:0038127	ERBB signaling pathway	63	4	5.2	1613	0.77481	1
GO:0038202	TORC1 signaling	36	3	2.97	1225	0.57985	1
GO:0040007	growth	385	19	31.75	2317	0.99635	1
GO:0040008	regulation of growth	261	11	21.53	2332	0.99694	1
GO:0040012	regulation of locomotion	52	1	4.29	2247	0.98881	1
GO:0040014	regulation of multicellular organism growth	41	5	3.38	659	0.24685	1
GO:0040017	positive regulation of locomotion	16	1	1.32	1546	0.7481	1
GO:0040020	regulation of meiotic nuclear division	10	4	0.82	291	0.00643	1
GO:0040029	regulation of gene expression, epigenetic	157	24	12.95	252	0.00221	1
GO:0042051	compound eye photoreceptor development	81	3	6.68	2142	0.96836	1
GO:0042058	regulation of epidermal growth factor receptor signaling pathway	46	3	3.79	1523	0.74347	1
GO:0042063	gliogenesis	72	1	5.94	2347	0.99803	1
GO:0042073	intraciliary transport	7	1	0.58	978	0.45272	1
GO:0042133	neurotransmitter metabolic process	27	3	2.23	847	0.38708	1
GO:0042157	lipoprotein metabolic process	57	6	4.7	743	0.3291	1
GO:0042158	lipoprotein biosynthetic process	54	6	4.45	696	0.28458	1
GO:0042221	response to chemical	788	29	64.99	2461	1	1
GO:0042254	ribosome biogenesis	197	2	16.25	2450	1	1
GO:0042255	ribosome assembly	42	1	3.46	2167	0.97338	1
GO:0042303	molting cycle	81	6	6.68	1374	0.66806	1
GO:0042325	regulation of phosphorylation	231	17	19.05	1510	0.72587	1
GO:0042327	positive regulation of phosphorylation	137	12	11.3	1001	0.45817	1
GO:0042330	taxis	277	12	22.85	2330	0.99685	1
GO:0042335	cuticle development	136	11	11.22	1173	0.5732	1
GO:0042337	cuticle development involved in chitin-based cuticle molting cycle	23	3	1.9	715	0.29398	1
GO:0042387	plasmatocyte differentiation	13	1	1.07	1404	0.67371	1
GO:0042440	pigment metabolic process	111	3	9.15	2313	0.99592	1
GO:0042441	eye pigment metabolic process	35	1	2.89	2075	0.9512	1
GO:0042451	purine nucleoside biosynthetic process	11	1	0.91	1276	0.6123	1
GO:0042455	ribonucleoside biosynthetic process	18	1	1.48	1642	0.78802	1
GO:0042461	photoreceptor cell development	100	4	8.25	2147	0.97021	1
GO:0042462	eye photoreceptor cell development	84	3	6.93	2171	0.97401	1
GO:0042478	regulation of eye photoreceptor cell development	10	2	0.82	612	0.19701	1
GO:0042551	neuron maturation	49	2	4.04	1976	0.92107	1
GO:0042592	homeostatic process	385	24	31.75	2048	0.94652	1
GO:0042593	glucose homeostasis	30	1	2.47	1992	0.92481	1
GO:0042659	regulation of cell fate specification	25	3	2.06	749	0.34064	1
GO:0042676	compound eye cone cell fate commitment	10	2	0.82	613	0.19701	1
GO:0042679	compound eye cone cell fate specification	5	2	0.41	428	0.05742	1
GO:0042692	muscle cell differentiation	104	3	8.58	2273	0.99333	1
GO:0042706	eye photoreceptor cell fate commitment	46	2	3.79	1918	0.90279	1
GO:0042745	circadian sleep/wake cycle	34	1	2.8	2055	0.94679	1
GO:0042886	amide transport	389	20	32.08	2278	0.99415	1
GO:0043038	amino acid activation	41	2	3.38	1830	0.86332	1
GO:0043039	tRNA aminoacylation	40	2	3.3	1805	0.85384	1
GO:0043043	peptide biosynthetic process	431	17	35.55	2426	0.99992	1
GO:0043062	extracellular structure organization	57	1	4.7	2269	0.99275	1
GO:0043063	intercellular bridge organization	12	1	0.99	1338	0.64433	1
GO:0043065	positive regulation of apoptotic process	50	4	4.12	1244	0.60023	1
GO:0043067	regulation of programmed cell death	204	13	16.83	1837	0.87033	1
GO:0043068	positive regulation of programmed cell death	66	4	5.44	1674	0.80519	1
GO:0043069	negative regulation of programmed cell death	97	8	8	1167	0.55402	1
GO:0043085	positive regulation of catalytic activity	173	16	14.27	825	0.35311	1
GO:0043086	negative regulation of catalytic activity	68	5	5.61	1379	0.67074	1
GO:0043149	stress fiber assembly	7	1	0.58	979	0.45272	1
GO:0043170	macromolecule metabolic process	3290	353	271.35	47	2.2e-12	1
GO:0043207	response to external biotic stimulus	269	12	22.19	2296	0.99532	1
GO:0043242	negative regulation of protein complex disassembly	14	2	1.15	735	0.32324	1
GO:0043254	regulation of protein complex assembly	95	3	7.84	2237	0.98759	1
GO:0043280	positive regulation of cysteine-type endopeptidase activity involved in apoptotic process	18	4	1.48	409	0.05533	1
GO:0043324	pigment metabolic process involved in developmental pigmentation	35	1	2.89	2076	0.9512	1
GO:0043331	response to dsRNA	21	2	1.73	1096	0.52659	1
GO:0043401	steroid hormone mediated signaling pathway	27	1	2.23	1910	0.90255	1
GO:0043405	regulation of MAP kinase activity	28	1	2.31	1943	0.91062	1
GO:0043406	positive regulation of MAP kinase activity	19	1	1.57	1682	0.80555	1
GO:0043408	regulation of MAPK cascade	132	8	10.89	1824	0.86278	1
GO:0043412	macromolecule modification	1100	106	90.72	387	0.04136	1
GO:0043413	macromolecule glycosylation	80	3	6.6	2131	0.96623	1
GO:0043414	macromolecule methylation	108	11	8.91	687	0.27633	1
GO:0043434	response to peptide hormone	43	1	3.55	2177	0.97558	1
GO:0043473	pigmentation	98	4	8.08	2133	0.96641	1
GO:0043474	pigment metabolic process involved in pigmentation	35	1	2.89	2077	0.9512	1
GO:0043487	regulation of RNA stability	13	1	1.07	1405	0.67371	1
GO:0043523	regulation of neuron apoptotic process	19	1	1.57	1683	0.80555	1
GO:0043543	protein acylation	96	17	7.92	249	0.00197	1
GO:0043549	regulation of kinase activity	102	9	8.41	1006	0.46761	1
GO:0043603	cellular amide metabolic process	541	20	44.62	2445	1	1
GO:0043604	amide biosynthetic process	449	17	37.03	2434	0.99997	1
GO:0043624	cellular protein complex disassembly	36	5	2.97	582	0.17148	1
GO:0043628	ncRNA 3'-end processing	29	4	2.39	625	0.21355	1
GO:0043631	RNA polyadenylation	27	2	2.23	1368	0.66512	1
GO:0043632	modification-dependent macromolecule catabolic process	212	13	17.49	1899	0.90112	1
GO:0043633	polyadenylation-dependent RNA catabolic process	6	1	0.49	897	0.40349	1
GO:0043634	polyadenylation-dependent ncRNA catabolic process	6	1	0.49	898	0.40349	1
GO:0043687	post-translational protein modification	12	2	0.99	669	0.26004	1
GO:0043696	dedifferentiation	8	1	0.66	1054	0.49791	1
GO:0043901	negative regulation of multi-organism process	26	2	2.14	1349	0.64452	1
GO:0043933	protein-containing complex subunit organization	524	46	43.22	756	0.3472	1
GO:0044057	regulation of system process	47	3	3.88	1568	0.75665	1
GO:0044085	cellular component biogenesis	1107	87	91.3	1482	0.71286	1
GO:0044089	positive regulation of cellular component biogenesis	118	7	9.73	1832	0.86521	1
GO:0044092	negative regulation of molecular function	88	5	7.26	1811	0.86207	1
GO:0044093	positive regulation of molecular function	199	19	16.41	692	0.28456	1
GO:0044106	cellular amine metabolic process	21	1	1.73	1771	0.83638	1
GO:0044237	cellular metabolic process	3879	377	319.93	104	6.1e-07	1
GO:0044238	primary metabolic process	3857	371	318.11	122	3.6e-06	1
GO:0044242	cellular lipid catabolic process	73	5	6.02	1514	0.73061	1
GO:0044255	cellular lipid metabolic process	302	14	24.91	2299	0.9955	1
GO:0044257	cellular protein catabolic process	233	13	19.22	2086	0.95451	1
GO:0044260	cellular macromolecule metabolic process	2602	313	214.61	27	8.2e-18	1
GO:0044262	cellular carbohydrate metabolic process	84	4	6.93	1982	0.92446	1
GO:0044264	cellular polysaccharide metabolic process	35	1	2.89	2078	0.9512	1
GO:0044265	cellular macromolecule catabolic process	334	25	27.55	1511	0.72721	1
GO:0044267	cellular protein metabolic process	1596	126	131.63	1518	0.73449	1
GO:0044270	cellular nitrogen compound catabolic process	153	13	12.62	1060	0.49813	1
GO:0044271	cellular nitrogen compound biosynthetic process	1531	167	126.27	143	2.2e-05	1
GO:0044281	small molecule metabolic process	667	32	55.01	2424	0.99989	1
GO:0044282	small molecule catabolic process	119	8	9.81	1614	0.77631	1
GO:0044283	small molecule biosynthetic process	194	6	16	2380	0.99913	1
GO:0044703	multi-organism reproductive process	829	93	68.37	228	0.00091	1
GO:0044772	mitotic cell cycle phase transition	103	27	8.5	82	3.7e-08	1
GO:0044774	mitotic DNA integrity checkpoint	23	13	1.9	75	3.8e-09	1
GO:0044782	cilium organization	45	8	3.71	371	0.02888	1
GO:0044784	metaphase/anaphase transition of cell cycle	31	7	2.56	315	0.01147	1
GO:0044786	cell cycle DNA replication	34	10	2.8	194	0.00029	1
GO:0044818	mitotic G2/M transition checkpoint	15	8	1.24	131	7.8e-06	1
GO:0044837	actomyosin contractile ring organization	27	6	2.23	350	0.02032	1
GO:0044839	cell cycle G2/M phase transition	37	12	3.05	145	2.4e-05	1
GO:0044843	cell cycle G1/S phase transition	36	10	2.97	208	0.00048	1
GO:0045017	glycerolipid biosynthetic process	58	6	4.78	753	0.34415	1
GO:0045047	protein targeting to ER	15	1	1.24	1506	0.72541	1
GO:0045137	development of primary sexual characteristics	44	2	3.63	1878	0.88848	1
GO:0045144	meiotic sister chromatid segregation	5	3	0.41	281	0.00492	1
GO:0045168	cell-cell signaling involved in cell fate commitment	32	1	2.64	2033	0.93675	1
GO:0045184	establishment of protein localization	395	22	32.58	2222	0.98529	1
GO:0045185	maintenance of protein location	34	3	2.8	1148	0.54023	1
GO:0045197	establishment or maintenance of epithelial cell apical/basal polarity	27	1	2.23	1911	0.90255	1
GO:0045216	cell-cell junction organization	75	1	6.19	2360	0.99848	1
GO:0045333	cellular respiration	96	3	7.92	2245	0.98841	1
GO:0045466	R7 cell differentiation	50	3	4.12	1655	0.79293	1
GO:0045596	negative regulation of cell differentiation	95	12	7.84	468	0.08977	1
GO:0045610	regulation of hemocyte differentiation	23	1	1.9	1819	0.86233	1
GO:0045611	negative regulation of hemocyte differentiation	10	1	0.82	1218	0.5774	1
GO:0045613	regulation of plasmatocyte differentiation	8	1	0.66	1055	0.49791	1
GO:0045614	negative regulation of plasmatocyte differentiation	8	1	0.66	1056	0.49791	1
GO:0045664	regulation of neuron differentiation	122	6	10.06	2045	0.94437	1
GO:0045665	negative regulation of neuron differentiation	19	2	1.57	1012	0.47255	1
GO:0045666	positive regulation of neuron differentiation	48	3	3.96	1606	0.76928	1
GO:0045676	regulation of R7 cell differentiation	12	2	0.99	670	0.26004	1
GO:0045704	regulation of salivary gland boundary specification	8	1	0.66	1057	0.49791	1
GO:0045740	positive regulation of DNA replication	9	1	0.74	1139	0.53936	1
GO:0045786	negative regulation of cell cycle	94	32	7.75	45	9.4e-13	1
GO:0045787	positive regulation of cell cycle	60	15	4.95	169	7.5e-05	1
GO:0045799	positive regulation of chromatin assembly or disassembly	8	2	0.66	537	0.13646	1
GO:0045814	negative regulation of gene expression, epigenetic	99	21	8.17	157	4.3e-05	1
GO:0045815	positive regulation of gene expression, epigenetic	17	3	1.4	561	0.16026	1
GO:0045839	negative regulation of mitotic nuclear division	16	4	1.32	384	0.03749	1
GO:0045840	positive regulation of mitotic nuclear division	14	1	1.15	1461	0.70067	1
GO:0045841	negative regulation of mitotic metaphase/anaphase transition	15	4	1.24	376	0.03002	1
GO:0045851	pH reduction	16	2	1.32	844	0.38499	1
GO:0045859	regulation of protein kinase activity	84	7	6.93	1154	0.54633	1
GO:0045861	negative regulation of proteolysis	32	2	2.64	1565	0.75395	1
GO:0045926	negative regulation of growth	93	5	7.67	1886	0.89179	1
GO:0045927	positive regulation of growth	91	5	7.51	1860	0.88063	1
GO:0045934	negative regulation of nucleobase-containing compound metabolic process	311	51	25.65	112	1.1e-06	1
GO:0045935	positive regulation of nucleobase-containing compound metabolic process	342	42	28.21	282	0.00543	1
GO:0045936	negative regulation of phosphate metabolic process	74	3	6.1	2068	0.95033	1
GO:0046011	regulation of oskar mRNA translation	14	1	1.15	1462	0.70067	1
GO:0046068	cGMP metabolic process	17	1	1.4	1595	0.76892	1
GO:0046128	purine ribonucleoside metabolic process	22	1	1.81	1794	0.84992	1
GO:0046129	purine ribonucleoside biosynthetic process	11	1	0.91	1277	0.6123	1
GO:0046131	pyrimidine ribonucleoside metabolic process	7	1	0.58	980	0.45272	1
GO:0046134	pyrimidine nucleoside biosynthetic process	7	1	0.58	981	0.45272	1
GO:0046148	pigment biosynthetic process	65	1	5.36	2319	0.99638	1
GO:0046154	rhodopsin metabolic process	16	1	1.32	1547	0.7481	1
GO:0046164	alcohol catabolic process	13	1	1.07	1406	0.67371	1
GO:0046189	phenol-containing compound biosynthetic process	13	1	1.07	1407	0.67371	1
GO:0046328	regulation of JNK cascade	51	1	4.21	2238	0.98779	1
GO:0046365	monosaccharide catabolic process	6	1	0.49	899	0.40349	1
GO:0046390	ribose phosphate biosynthetic process	78	3	6.43	2115	0.96155	1
GO:0046395	carboxylic acid catabolic process	86	6	7.09	1493	0.72375	1
GO:0046425	regulation of JAK-STAT cascade	33	3	2.72	1081	0.51963	1
GO:0046434	organophosphate catabolic process	49	1	4.04	2225	0.98548	1
GO:0046460	neutral lipid biosynthetic process	12	1	0.99	1339	0.64433	1
GO:0046463	acylglycerol biosynthetic process	12	1	0.99	1340	0.64433	1
GO:0046466	membrane lipid catabolic process	16	1	1.32	1548	0.7481	1
GO:0046467	membrane lipid biosynthetic process	65	5	5.36	1308	0.63089	1
GO:0046474	glycerophospholipid biosynthetic process	46	5	3.79	741	0.32891	1
GO:0046483	heterocycle metabolic process	2006	271	165.45	16	4.5e-22	1
GO:0046486	glycerolipid metabolic process	110	6	9.07	1898	0.90045	1
GO:0046488	phosphatidylinositol metabolic process	63	5	5.2	1253	0.60276	1
GO:0046528	imaginal disc fusion	18	3	1.48	591	0.18124	1
GO:0046530	photoreceptor cell differentiation	166	11	13.69	1709	0.81738	1
GO:0046532	regulation of photoreceptor cell differentiation	28	4	2.31	600	0.19591	1
GO:0046534	positive regulation of photoreceptor cell differentiation	9	2	0.74	578	0.16625	1
GO:0046552	photoreceptor cell fate commitment	48	2	3.96	1954	0.91537	1
GO:0046578	regulation of Ras protein signal transduction	122	8	10.06	1666	0.79918	1
GO:0046666	retinal cell programmed cell death	27	1	2.23	1912	0.90255	1
GO:0046667	compound eye retinal cell programmed cell death	25	1	2.06	1871	0.88417	1
GO:0046668	regulation of retinal cell programmed cell death	17	1	1.4	1596	0.76892	1
GO:0046669	regulation of compound eye retinal cell programmed cell death	16	1	1.32	1549	0.7481	1
GO:0046670	positive regulation of retinal cell programmed cell death	7	1	0.58	982	0.45272	1
GO:0046700	heterocycle catabolic process	155	13	12.78	1076	0.51761	1
GO:0046717	acid secretion	8	1	0.66	1058	0.49791	1
GO:0046903	secretion	196	6	16.17	2386	0.99923	1
GO:0046916	cellular transition metal ion homeostasis	24	1	1.98	1852	0.87372	1
GO:0046942	carboxylic acid transport	64	3	5.28	1927	0.90765	1
GO:0048056	R3/R4 cell differentiation	15	2	1.24	829	0.35438	1
GO:0048066	developmental pigmentation	93	3	7.67	2227	0.98578	1
GO:0048067	cuticle pigmentation	40	2	3.3	1806	0.85384	1
GO:0048069	eye pigmentation	44	1	3.63	2186	0.97761	1
GO:0048070	regulation of developmental pigmentation	21	1	1.73	1772	0.83638	1
GO:0048079	regulation of cuticle pigmentation	13	1	1.07	1408	0.67371	1
GO:0048103	somatic stem cell division	46	4	3.79	1104	0.53277	1
GO:0048134	germ-line cyst formation	28	2	2.31	1427	0.68474	1
GO:0048135	female germ-line cyst formation	21	2	1.73	1097	0.52659	1
GO:0048138	germ-line cyst encapsulation	19	2	1.57	1013	0.47255	1
GO:0048139	female germ-line cyst encapsulation	11	2	0.91	649	0.22838	1
GO:0048193	Golgi vesicle transport	118	4	9.73	2257	0.99029	1
GO:0048232	male gamete generation	181	26	14.93	263	0.00358	1
GO:0048284	organelle fusion	76	2	6.27	2248	0.98899	1
GO:0048285	organelle fission	277	83	22.85	12	3.6e-27	1
GO:0048469	cell maturation	169	11	13.94	1756	0.83462	1
GO:0048511	rhythmic process	130	3	10.72	2377	0.99896	1
GO:0048512	circadian behavior	84	1	6.93	2389	0.99931	1
GO:0048513	animal organ development	968	68	79.84	2040	0.9415	1
GO:0048515	spermatid differentiation	66	5	5.44	1346	0.64449	1
GO:0048518	positive regulation of biological process	1168	104	96.33	622	0.20181	1
GO:0048523	negative regulation of cellular process	967	114	79.76	147	2.5e-05	1
GO:0048534	hematopoietic or lymphoid organ development	82	7	6.76	1087	0.52011	1
GO:0048545	response to steroid hormone	27	1	2.23	1913	0.90255	1
GO:0048546	digestive tract morphogenesis	54	5	4.45	1002	0.46307	1
GO:0048563	post-embryonic animal organ morphogenesis	312	25	25.73	1234	0.59249	1
GO:0048568	embryonic organ development	46	2	3.79	1919	0.90279	1
GO:0048583	regulation of response to stimulus	818	62	67.47	1646	0.78804	1
GO:0048584	positive regulation of response to stimulus	377	34	31.09	723	0.31515	1
GO:0048588	developmental cell growth	63	1	5.2	2308	0.99569	1
GO:0048589	developmental growth	303	16	24.99	2213	0.98339	1
GO:0048592	eye morphogenesis	257	16	21.2	1934	0.91016	1
GO:0048598	embryonic morphogenesis	192	13	15.84	1701	0.81059	1
GO:0048599	oocyte development	133	9	10.97	1615	0.77914	1
GO:0048608	reproductive structure development	67	2	5.53	2189	0.97844	1
GO:0048609	multicellular organismal reproductive process	827	89	68.21	270	0.00411	1
GO:0048619	embryonic hindgut morphogenesis	40	5	3.3	653	0.23109	1
GO:0048638	regulation of developmental growth	188	8	15.51	2255	0.98998	1
GO:0048639	positive regulation of developmental growth	70	3	5.77	2028	0.93611	1
GO:0048645	animal organ formation	42	5	3.46	673	0.26288	1
GO:0048663	neuron fate commitment	51	2	4.21	2016	0.93141	1
GO:0048667	cell morphogenesis involved in neuron differentiation	357	18	29.44	2277	0.99375	1
GO:0048675	axon extension	46	1	3.79	2199	0.98117	1
GO:0048699	generation of neurons	679	46	56	2039	0.94107	1
GO:0048707	instar larval or pupal morphogenesis	359	26	29.61	1647	0.78817	1
GO:0048729	tissue morphogenesis	494	35	40.74	1807	0.85562	1
GO:0048731	system development	1416	98	116.79	2206	0.98251	1
GO:0048732	gland development	151	6	12.45	2244	0.98827	1
GO:0048736	appendage development	271	19	22.35	1672	0.80508	1
GO:0048737	imaginal disc-derived appendage development	267	19	22.02	1624	0.78455	1
GO:0048753	pigment granule organization	9	1	0.74	1140	0.53936	1
GO:0048856	anatomical structure development	2093	167	172.62	1485	0.71649	1
[truncated: 1,861 more rows]

## Sheet: GO_evo_up
GO.ID	Term	Annotated	Significant	Expected	Rank in Fisher.classic	Fisher.classic	Fisher.weight01
GO:0007304	chorion-containing eggshell formation	105	16	1.68	1	6.4e-12	2.6e-09
GO:0007306	eggshell chorion assembly	71	7	1.14	8	0.00013	5.6e-05
GO:0009617	response to bacterium	170	6	2.73	63	0.05507	0.00031
GO:0071051	polyadenylation-dependent snoRNA 3'-end processing	5	2	0.08	11	0.00247	0.00247
GO:0034475	U4 snRNA 3'-end processing	7	2	0.11	14	0.00508	0.00508
GO:0034427	nuclear-transcribed mRNA catabolic process, exonucleolytic, 3'-5'	8	2	0.13	16	0.0067	0.0067
GO:0042438	melanin biosynthetic process	8	2	0.13	17	0.0067	0.0067
GO:0006309	apoptotic DNA fragmentation	9	2	0.14	20	0.00852	0.00852
GO:0071028	nuclear mRNA surveillance	9	2	0.14	21	0.00852	0.00852
GO:0007494	midgut development	27	3	0.43	25	0.00887	0.00887
GO:0015695	organic cation transport	10	2	0.16	26	0.01054	0.01054
GO:0016075	rRNA catabolic process	10	2	0.16	27	0.01054	0.01054
GO:0031125	rRNA 3'-end processing	10	2	0.16	28	0.01054	0.01054
GO:0006952	defense response	298	6	4.78	252	0.34371	0.01065
GO:0007305	vitelline membrane formation involved in chorion-containing eggshell formation	11	2	0.18	30	0.01275	0.01275
GO:0007492	endoderm development	6	2	0.1	12	0.00366	0.0159
GO:0051168	nuclear export	68	2	1.09	215	0.2977	0.01604
GO:0016339	calcium-dependent cell-cell adhesion via plasma membrane cell adhesion molecules	16	2	0.26	46	0.0264	0.0264
GO:0007390	germ-band shortening	20	2	0.32	58	0.04011	0.04011
GO:0040003	chitin-based cuticle development	82	4	1.31	59	0.04221	0.04221
GO:0043252	sodium-independent organic anion transport	27	2	0.43	74	0.06895	0.06895
GO:0002065	columnar/cuboidal epithelial cell differentiation	288	17	4.62	3	2.9e-06	0.06995
GO:0006820	anion transport	170	5	2.73	126	0.13697	0.07269
GO:0000290	deadenylation-dependent decapping of nuclear-transcribed mRNA	5	1	0.08	78	0.07764	0.07764
GO:0001706	endoderm formation	5	1	0.08	79	0.07764	0.07764
GO:0006716	juvenile hormone metabolic process	5	1	0.08	80	0.07764	0.07764
GO:0006939	smooth muscle contraction	5	1	0.08	81	0.07764	0.07764
GO:0007004	telomere maintenance via telomerase	5	1	0.08	82	0.07764	0.07764
GO:0015858	nucleoside transport	5	1	0.08	83	0.07764	0.07764
GO:0032222	regulation of synaptic transmission, cholinergic	5	1	0.08	84	0.07764	0.07764
GO:0042688	crystal cell differentiation	5	1	0.08	85	0.07764	0.07764
GO:0046692	sperm competition	5	1	0.08	86	0.07764	0.07764
GO:0050848	regulation of calcium-mediated signaling	5	1	0.08	87	0.07764	0.07764
GO:0032504	multicellular organism reproduction	898	23	14.39	35	0.01451	0.08718
GO:0001710	mesodermal cell fate commitment	6	1	0.1	95	0.09244	0.09244
GO:0006336	DNA replication-independent nucleosome assembly	6	1	0.1	96	0.09244	0.09244
GO:0006384	transcription initiation from RNA polymerase III promoter	6	1	0.1	97	0.09244	0.09244
GO:0006801	superoxide metabolic process	6	1	0.1	98	0.09244	0.09244
GO:0030728	ovulation	6	1	0.1	99	0.09244	0.09244
GO:0035094	response to nicotine	6	1	0.1	100	0.09244	0.09244
GO:0040031	snRNA modification	6	1	0.1	101	0.09244	0.09244
GO:0046665	amnioserosa maintenance	6	1	0.1	102	0.09244	0.09244
GO:0046688	response to copper ion	6	1	0.1	103	0.09244	0.09244
GO:0055114	oxidation-reduction process	433	11	6.94	94	0.0862	0.10159
GO:0008258	head involution	34	2	0.55	107	0.10262	0.10262
GO:0006313	transposition, DNA-mediated	7	1	0.11	108	0.10699	0.10699
GO:0007503	fat body development	7	1	0.11	109	0.10699	0.10699
GO:0007516	hemocyte development	7	1	0.11	110	0.10699	0.10699
GO:0009396	folic acid-containing compound biosynthetic process	7	1	0.11	111	0.10699	0.10699
GO:0031118	rRNA pseudouridine synthesis	7	1	0.11	112	0.10699	0.10699
GO:0034508	centromere complex assembly	7	1	0.11	113	0.10699	0.10699
GO:0007275	multicellular organism development	1822	21	29.21	689	0.97306	0.12092
GO:0006544	glycine metabolic process	8	1	0.13	116	0.12132	0.12132
GO:0048067	cuticle pigmentation	40	2	0.64	118	0.1343	0.1343
GO:0043044	ATP-dependent chromatin remodeling	32	2	0.51	105	0.09259	0.13474
GO:0006152	purine nucleoside catabolic process	9	1	0.14	119	0.13542	0.13542
GO:0006937	regulation of muscle contraction	9	1	0.14	120	0.13542	0.13542
GO:0009253	peptidoglycan catabolic process	9	1	0.14	121	0.13542	0.13542
GO:0046653	tetrahydrofolate metabolic process	9	1	0.14	122	0.13542	0.13542
GO:0090328	regulation of olfactory learning	9	1	0.14	123	0.13542	0.13542
GO:0006767	water-soluble vitamin metabolic process	10	1	0.16	128	0.1493	0.1493
GO:0009070	serine family amino acid biosynthetic process	10	1	0.16	129	0.1493	0.1493
GO:0042766	nucleosome mobilization	10	1	0.16	130	0.1493	0.1493
GO:0045611	negative regulation of hemocyte differentiation	10	1	0.16	131	0.1493	0.1493
GO:0046843	dorsal appendage formation	44	2	0.71	138	0.15648	0.15648
GO:0000054	ribosomal subunit export from nucleus	11	1	0.18	140	0.16295	0.16295
GO:0071480	cellular response to gamma radiation	11	1	0.18	141	0.16295	0.16295
GO:0043604	amide biosynthetic process	449	4	7.2	610	0.93549	0.16843
GO:0006959	humoral immune response	85	3	1.36	135	0.15536	0.17524
GO:0007020	microtubule nucleation	12	1	0.19	153	0.17639	0.17639
GO:0009914	hormone transport	12	1	0.19	154	0.17639	0.17639
GO:0033962	cytoplasmic mRNA processing body assembly	12	1	0.19	155	0.17639	0.17639
GO:0044331	cell-cell adhesion mediated by cadherin	12	1	0.19	156	0.17639	0.17639
GO:0098781	ncRNA transcription	12	1	0.19	157	0.17639	0.17639
GO:0055085	transmembrane transport	447	7	7.17	381	0.58132	0.18453
GO:0007527	adult somatic muscle development	13	1	0.21	164	0.18962	0.18962
GO:0010025	wax biosynthetic process	13	1	0.21	165	0.18962	0.18962
GO:0015696	ammonium transport	13	1	0.21	166	0.18962	0.18962
GO:0042325	regulation of phosphorylation	231	2	3.7	575	0.88994	0.19339
GO:0050789	regulation of biological process	2987	24	47.88	852	1	0.19758
GO:0006144	purine nucleobase metabolic process	14	1	0.22	172	0.20263	0.20263
GO:0006584	catecholamine metabolic process	14	1	0.22	173	0.20263	0.20263
GO:0035336	long-chain fatty-acyl-CoA metabolic process	14	1	0.22	174	0.20263	0.20263
GO:0032502	developmental process	2185	39	35.02	186	0.23772	0.20797
GO:0016266	O-glycan processing	15	1	0.24	179	0.21544	0.21544
GO:0006807	nitrogen compound metabolic process	3667	43	58.78	813	0.99886	0.22115
GO:0006508	proteolysis	573	11	9.18	230	0.31107	0.22168
GO:0055070	copper ion homeostasis	16	1	0.26	182	0.22804	0.22804
GO:0045471	response to ethanol	65	2	1.04	207	0.27982	0.24002
GO:0042136	neurotransmitter biosynthetic process	17	1	0.27	188	0.24044	0.24044
GO:0044719	regulation of imaginal disc-derived wing size	18	1	0.29	194	0.25264	0.25264
GO:0050805	negative regulation of synaptic transmission	18	1	0.29	195	0.25264	0.25264
GO:0000096	sulfur amino acid metabolic process	19	1	0.3	200	0.26465	0.26465
GO:0000413	protein peptidyl-prolyl isomerization	20	1	0.32	204	0.27647	0.27647
GO:0043171	peptide catabolic process	20	1	0.32	205	0.27647	0.27647
GO:0001737	establishment of imaginal disc-derived wing hair orientation	21	1	0.34	209	0.2881	0.2881
GO:0035050	embryonic heart tube development	21	1	0.34	210	0.2881	0.2881
GO:0035162	embryonic hemopoiesis	21	1	0.34	211	0.2881	0.2881
GO:0040018	positive regulation of multicellular organism growth	21	1	0.34	212	0.2881	0.2881
GO:0007507	heart development	88	3	1.41	149	0.167	0.28947
GO:0007264	small GTPase mediated signal transduction	212	2	3.4	552	0.85911	0.29251
GO:0010951	negative regulation of endopeptidase activity	22	1	0.35	217	0.29954	0.29954
GO:0043486	histone exchange	23	1	0.37	223	0.31081	0.31081
GO:0000460	maturation of 5.8S rRNA	24	1	0.38	233	0.32189	0.32189
GO:0000470	maturation of LSU-rRNA	24	1	0.38	234	0.32189	0.32189
GO:0015893	drug transport	24	1	0.38	235	0.32189	0.32189
GO:0036335	intestinal stem cell homeostasis	24	1	0.38	236	0.32189	0.32189
GO:0006469	negative regulation of protein kinase activity	25	1	0.4	242	0.33279	0.33279
GO:0045824	negative regulation of innate immune response	25	1	0.4	243	0.33279	0.33279
GO:0050830	defense response to Gram-positive bacterium	25	1	0.4	244	0.33279	0.33279
GO:0043648	dicarboxylic acid metabolic process	26	1	0.42	249	0.34353	0.34353
GO:0019731	antibacterial humoral response	27	1	0.43	253	0.35409	0.35409
GO:0030198	extracellular matrix organization	45	3	0.72	50	0.03498	0.36017
GO:0090263	positive regulation of canonical Wnt signaling pathway	28	1	0.45	258	0.36448	0.36448
GO:0009790	embryo development	445	6	7.13	460	0.72632	0.36893
GO:0044242	cellular lipid catabolic process	73	2	1.17	240	0.32734	0.37396
GO:0006612	protein targeting to membrane	29	1	0.46	260	0.37471	0.37471
GO:0007156	homophilic cell adhesion via plasma membrane adhesion molecules	29	1	0.46	261	0.37471	0.37471
GO:0045893	positive regulation of transcription, DNA-templated	313	5	5.02	371	0.56785	0.3884
GO:0003333	amino acid transmembrane transport	32	1	0.51	267	0.40442	0.40442
GO:0034599	cellular response to oxidative stress	32	1	0.51	268	0.40442	0.40442
GO:0007427	epithelial cell migration, open tracheal system	33	1	0.53	275	0.41401	0.41401
GO:0042273	ribosomal large subunit biogenesis	58	2	0.93	187	0.23806	0.42175
GO:0016203	muscle attachment	34	1	0.55	278	0.42344	0.42344
GO:0019395	fatty acid oxidation	35	1	0.56	283	0.43273	0.43273
GO:0030537	larval behavior	35	1	0.56	284	0.43273	0.43273
GO:0008039	synaptic target recognition	36	1	0.58	290	0.44186	0.44186
GO:0035167	larval lymph gland hemopoiesis	36	1	0.58	291	0.44186	0.44186
GO:0007391	dorsal closure	95	2	1.52	301	0.45229	0.45229
GO:0008354	germ cell migration	38	1	0.61	304	0.4597	0.4597
GO:0051607	defense response to virus	38	1	0.61	305	0.4597	0.4597
GO:0008063	Toll signaling pathway	40	1	0.64	316	0.47697	0.47697
GO:0030155	regulation of cell adhesion	40	1	0.64	317	0.47697	0.47697
GO:0030307	positive regulation of cell growth	40	1	0.64	318	0.47697	0.47697
GO:0048190	wing disc dorsal/ventral pattern formation	41	1	0.66	322	0.4854	0.4854
GO:0007608	sensory perception of smell	42	1	0.67	327	0.4937	0.4937
GO:0042255	ribosome assembly	42	1	0.67	328	0.4937	0.4937
GO:0007605	sensory perception of sound	44	1	0.71	333	0.5099	0.5099
GO:0009062	fatty acid catabolic process	44	1	0.71	334	0.5099	0.5099
GO:0006836	neurotransmitter transport	107	2	1.72	337	0.51484	0.51484
GO:0019730	antimicrobial humoral response	73	2	1.17	241	0.32734	0.52384
GO:0042058	regulation of epidermal growth factor receptor signaling pathway	46	1	0.74	347	0.52558	0.52558
GO:0060179	male mating behavior	46	1	0.74	348	0.52558	0.52558
GO:0006457	protein folding	112	2	1.8	356	0.5395	0.5395
GO:0048518	positive regulation of biological process	1168	8	18.72	819	0.99916	0.53961
GO:0006400	tRNA modification	48	1	0.77	357	0.54076	0.54076
GO:0048149	behavioral response to ethanol	48	1	0.77	358	0.54076	0.54076
GO:0006399	tRNA metabolic process	120	2	1.92	378	0.57714	0.54861
GO:0018130	heterocycle biosynthetic process	1147	11	18.39	717	0.98351	0.55247
GO:0042067	establishment of ommatidial planar polarity	50	1	0.8	365	0.55546	0.55546
GO:0006520	cellular amino acid metabolic process	145	3	2.32	272	0.4119	0.57499
GO:0055065	metal ion homeostasis	92	2	1.47	287	0.43596	0.58225
GO:0006413	translational initiation	54	1	0.87	383	0.58348	0.58348
GO:0007155	cell adhesion	158	4	2.53	192	0.24745	0.58589
GO:0006030	chitin metabolic process	56	1	0.9	388	0.59682	0.59682
GO:0006888	ER to Golgi vesicle-mediated transport	60	1	0.96	398	0.62226	0.62226
GO:0007423	sensory organ development	383	2	6.14	730	0.98685	0.64198
GO:0007552	metamorphosis	374	3	6	626	0.94377	0.64425
GO:0009306	protein secretion	66	1	1.06	421	0.65745	0.65745
GO:0006629	lipid metabolic process	386	3	6.19	633	0.9515	0.66216
GO:0000902	cell morphogenesis	466	2	7.47	772	0.9962	0.66398
GO:0006364	rRNA processing	132	5	2.12	68	0.06046	0.67967
GO:0006403	RNA localization	166	2	2.66	482	0.75018	0.68082
GO:0006979	response to oxidative stress	103	2	1.65	331	0.49451	0.68275
GO:1901362	organic cyclic compound biosynthetic process	1183	13	18.96	643	0.95464	0.69518
GO:0009887	animal organ morphogenesis	603	4	9.67	747	0.98978	0.69749
GO:0016573	histone acetylation	74	1	1.19	438	0.69937	0.69937
GO:0045995	regulation of embryonic development	74	1	1.19	439	0.69937	0.69937
GO:0000398	mRNA splicing, via spliceosome	226	3	3.62	449	0.708	0.708
GO:0006367	transcription initiation from RNA polymerase II promoter	76	1	1.22	452	0.70903	0.70903
GO:0045944	positive regulation of transcription by RNA polymerase II	230	3	3.69	457	0.71922	0.71922
GO:0010629	negative regulation of gene expression	472	6	7.57	497	0.77704	0.72723
GO:0007548	sex differentiation	80	1	1.28	461	0.72743	0.72743
GO:0007435	salivary gland morphogenesis	81	1	1.3	466	0.73185	0.73185
GO:0007600	sensory perception	206	3	3.3	417	0.64683	0.73189
GO:0007613	memory	97	1	1.55	512	0.7936	0.7936
GO:0009165	nucleotide biosynthetic process	98	1	1.57	514	0.79696	0.79696
GO:0006342	chromatin silencing	99	1	1.59	517	0.80025	0.80025
GO:0042461	photoreceptor cell development	100	1	1.6	519	0.8035	0.8035
GO:0002181	cytoplasmic translation	103	1	1.65	530	0.81293	0.81293
GO:0042742	defense response to bacterium	149	2	2.39	437	0.6946	0.81523
GO:0001709	cell fate determination	120	1	1.92	551	0.85847	0.85847
GO:0046578	regulation of Ras protein signal transduction	122	1	1.96	553	0.86305	0.86305
GO:0009416	response to light stimulus	127	1	2.04	558	0.87385	0.87385
GO:0007015	actin filament organization	129	1	2.07	565	0.87794	0.87794
GO:0007623	circadian rhythm	129	1	2.07	566	0.87794	0.87794
GO:0008340	determination of adult lifespan	134	1	2.15	573	0.88758	0.88758
GO:0016311	dephosphorylation	135	1	2.16	574	0.88941	0.88941
GO:0006914	autophagy	140	1	2.24	581	0.89816	0.89816
GO:0048468	cell development	1169	21	18.74	232	0.3193	0.89827
GO:0045165	cell fate commitment	261	2	4.18	598	0.92622	0.89845
GO:0016567	protein ubiquitination	154	1	2.47	592	0.91916	0.91916
GO:0051240	positive regulation of multicellular organismal process	179	2	2.87	504	0.78666	0.9232
GO:1902533	positive regulation of intracellular signal transduction	160	1	2.56	599	0.92678	0.92678
GO:0045892	negative regulation of transcription, DNA-templated	277	2	4.44	619	0.94066	0.94647
GO:0006355	regulation of transcription, DNA-templated	872	8	13.98	693	0.97598	0.95006
GO:0009880	embryonic pattern specification	185	1	2.97	635	0.95159	0.95159
GO:0006974	cellular response to DNA damage stimulus	191	1	3.06	646	0.95618	0.95618
GO:0035282	segmentation	198	1	3.17	657	0.96099	0.96099
GO:0046907	intracellular transport	553	4	8.86	711	0.9809	0.96634
GO:0017144	drug metabolic process	275	3	4.41	534	0.82353	0.96765
GO:0007411	axon guidance	211	1	3.38	677	0.96857	0.96857
GO:0007166	cell surface receptor signaling pathway	565	4	9.06	718	0.98352	0.97516
GO:0000226	microtubule cytoskeleton organization	263	2	4.22	602	0.92819	0.97521
GO:0048646	anatomical structure formation involved in morphogenesis	440	18	7.05	9	0.0002	0.97803
GO:1901566	organonitrogen compound biosynthetic process	820	5	13.14	799	0.99788	0.9852
GO:0030163	protein catabolic process	258	1	4.14	727	0.98566	0.98566
GO:0006357	regulation of transcription by RNA polymerase II	530	4	8.5	690	0.97474	0.99316
GO:0032879	regulation of localization	351	1	5.63	780	0.99701	0.99701
GO:0000278	mitotic cell cycle	419	1	6.72	818	0.99906	0.99906
GO:0000003	reproduction	994	24	15.93	44	0.02425	1
GO:0000154	rRNA modification	24	1	0.38	237	0.32189	1
GO:0000270	peptidoglycan metabolic process	9	1	0.14	124	0.13542	1
GO:0000288	nuclear-transcribed mRNA catabolic process, deadenylation-dependent decay	27	1	0.43	254	0.35409	1
GO:0000291	nuclear-transcribed mRNA catabolic process, exonucleolytic	10	2	0.16	29	0.01054	1
GO:0000375	RNA splicing, via transesterification reactions	226	3	3.62	450	0.708	1
GO:0000377	RNA splicing, via transesterification reactions with bulged adenosine as nucleophile	226	3	3.62	451	0.708	1
GO:0000723	telomere maintenance	29	1	0.46	262	0.37471	1
GO:0000737	DNA catabolic process, endonucleolytic	11	2	0.18	31	0.01275	1
GO:0000904	cell morphogenesis involved in differentiation	386	1	6.19	806	0.99835	1
GO:0000956	nuclear-transcribed mRNA catabolic process	54	3	0.87	64	0.0552	1
GO:0001505	regulation of neurotransmitter levels	110	1	1.76	541	0.83322	1
GO:0001522	pseudouridine synthesis	14	1	0.22	175	0.20263	1
GO:0001558	regulation of cell growth	68	1	1.09	426	0.66844	1
GO:0001654	eye development	322	1	5.16	766	0.99512	1
GO:0001667	ameboidal-type cell migration	160	1	2.56	600	0.92678	1
GO:0001700	embryonic development via the syncytial blastoderm	152	3	2.44	296	0.44187	1
GO:0001704	formation of primary germ layer	24	1	0.38	238	0.32189	1
GO:0001707	mesoderm formation	19	1	0.3	201	0.26465	1
GO:0001736	establishment of planar polarity	88	1	1.41	491	0.76085	1
GO:0001738	morphogenesis of a polarized epithelium	100	1	1.6	520	0.8035	1
GO:0001745	compound eye morphogenesis	247	1	3.96	716	0.98276	1
GO:0001894	tissue homeostasis	44	1	0.71	335	0.5099	1
GO:0001932	regulation of protein phosphorylation	213	1	3.41	680	0.9696	1
GO:0001933	negative regulation of protein phosphorylation	62	1	0.99	403	0.63437	1
GO:0002009	morphogenesis of an epithelium	481	4	7.71	644	0.95505	1
GO:0002064	epithelial cell development	311	16	4.99	7	3.2e-05	1
GO:0002066	columnar/cuboidal epithelial cell development	283	16	4.54	6	1e-05	1
GO:0002164	larval development	130	1	2.08	568	0.87993	1
GO:0002165	instar larval or pupal development	444	2	7.12	764	0.9947	1
GO:0002252	immune effector process	107	1	1.72	535	0.8248	1
GO:0002376	immune system process	373	6	5.98	368	0.55634	1
GO:0002520	immune system development	82	1	1.31	469	0.73619	1
GO:0002682	regulation of immune system process	187	2	3	525	0.80673	1
GO:0002683	negative regulation of immune system process	52	2	0.83	171	0.20257	1
GO:0002790	peptide secretion	72	1	1.15	433	0.68939	1
GO:0003002	regionalization	372	2	5.96	723	0.98456	1
GO:0003006	developmental process involved in reproduction	699	17	11.2	62	0.05283	1
GO:0003008	system process	450	5	7.21	549	0.8561	1
GO:0003012	muscle system process	32	1	0.51	269	0.40442	1
GO:0006022	aminoglycan metabolic process	82	2	1.31	265	0.37977	1
GO:0006026	aminoglycan catabolic process	29	1	0.46	263	0.37471	1
GO:0006027	glycosaminoglycan catabolic process	9	1	0.14	125	0.13542	1
GO:0006040	amino sugar metabolic process	67	1	1.07	425	0.66299	1
GO:0006082	organic acid metabolic process	334	4	5.35	509	0.7901	1
GO:0006139	nucleobase-containing compound metabolic process	1946	23	31.19	682	0.96976	1
GO:0006259	DNA metabolic process	283	4	4.54	427	0.67092	1
GO:0006278	RNA-dependent DNA biosynthetic process	5	1	0.08	88	0.07764	1
GO:0006308	DNA catabolic process	17	2	0.27	47	0.02961	1
GO:0006310	DNA recombination	74	1	1.19	440	0.69937	1
GO:0006323	DNA packaging	86	1	1.38	484	0.75289	1
GO:0006325	chromatin organization	327	3	5.24	584	0.90145	1
GO:0006333	chromatin assembly or disassembly	47	1	0.75	352	0.53323	1
GO:0006334	nucleosome assembly	22	1	0.35	218	0.29954	1
GO:0006338	chromatin remodeling	102	2	1.64	325	0.48934	1
GO:0006351	transcription, DNA-templated	933	8	14.96	731	0.9872	1
GO:0006352	DNA-templated transcription, initiation	85	1	1.36	480	0.74882	1
GO:0006366	transcription by RNA polymerase II	566	4	9.07	721	0.98373	1
GO:0006383	transcription by RNA polymerase III	18	1	0.29	196	0.25264	1
GO:0006396	RNA processing	524	9	8.4	310	0.46545	1
GO:0006397	mRNA processing	278	3	4.46	537	0.82915	1
GO:0006401	RNA catabolic process	83	3	1.33	127	0.14776	1
GO:0006402	mRNA catabolic process	70	3	1.12	106	0.10172	1
GO:0006405	RNA export from nucleus	61	1	0.98	402	0.62836	1
GO:0006412	translation	396	2	6.35	740	0.98914	1
GO:0006464	cellular protein modification process	1011	5	16.21	832	0.99985	1
GO:0006468	protein phosphorylation	370	1	5.93	797	0.99784	1
GO:0006473	protein acetylation	79	1	1.27	459	0.72294	1
GO:0006475	internal protein amino acid acetylation	75	1	1.2	443	0.70424	1
GO:0006486	protein glycosylation	80	1	1.28	462	0.72743	1
GO:0006493	protein O-linked glycosylation	35	1	0.56	285	0.43273	1
GO:0006518	peptide metabolic process	497	3	7.97	736	0.98852	1
GO:0006575	cellular modified amino acid metabolic process	63	1	1.01	407	0.64028	1
GO:0006582	melanin metabolic process	49	2	0.79	162	0.18507	1
GO:0006605	protein targeting	84	1	1.35	472	0.74468	1
GO:0006611	protein export from nucleus	56	1	0.9	389	0.59682	1
GO:0006631	fatty acid metabolic process	91	1	1.46	494	0.7723	1
GO:0006637	acyl-CoA metabolic process	34	1	0.55	279	0.42344	1
GO:0006714	sesquiterpenoid metabolic process	5	1	0.08	89	0.07764	1
GO:0006720	isoprenoid metabolic process	22	1	0.35	219	0.29954	1
GO:0006721	terpenoid metabolic process	10	1	0.16	132	0.1493	1
GO:0006725	cellular aromatic compound metabolic process	2055	26	32.94	622	0.94127	1
GO:0006732	coenzyme metabolic process	120	2	1.92	379	0.57714	1
GO:0006753	nucleoside phosphate metabolic process	197	1	3.16	654	0.96034	1
GO:0006760	folic acid-containing compound metabolic process	11	1	0.18	142	0.16295	1
GO:0006766	vitamin metabolic process	12	1	0.19	158	0.17639	1
GO:0006790	sulfur compound metabolic process	128	2	2.05	395	0.61251	1
GO:0006793	phosphorus metabolic process	857	5	13.74	812	0.9987	1
GO:0006796	phosphate-containing compound metabolic process	815	4	13.06	823	0.99943	1
GO:0006810	transport	1370	12	21.96	771	0.99615	1
GO:0006811	ion transport	377	5	6.04	465	0.72998	1
GO:0006812	cation transport	209	2	3.35	547	0.85359	1
GO:0006865	amino acid transport	39	1	0.63	312	0.46841	1
GO:0006886	intracellular protein transport	310	2	4.97	660	0.96247	1
GO:0006913	nucleocytoplasmic transport	109	2	1.75	344	0.52481	1
GO:0006915	apoptotic process	231	2	3.7	576	0.88994	1
GO:0006921	cellular component disassembly involved in execution phase of apoptosis	9	2	0.14	22	0.00852	1
GO:0006928	movement of cell or subcellular component	532	3	8.53	755	0.99288	1
GO:0006935	chemotaxis	233	1	3.73	698	0.97822	1
GO:0006936	muscle contraction	23	1	0.37	224	0.31081	1
GO:0006950	response to stress	956	9	15.32	696	0.977	1
GO:0006955	immune response	246	4	3.94	369	0.56006	1
GO:0006996	organelle organization	1453	9	23.29	840	0.99993	1
GO:0007010	cytoskeleton organization	500	3	8.01	739	0.98898	1
GO:0007017	microtubule-based process	322	2	5.16	676	0.96831	1
GO:0007049	cell cycle	646	1	10.36	844	0.99998	1
GO:0007154	cell communication	1452	7	23.27	848	1	1
GO:0007163	establishment or maintenance of cell polarity	185	1	2.97	636	0.95159	1
GO:0007164	establishment of tissue polarity	88	1	1.41	492	0.76085	1
GO:0007165	signal transduction	1242	6	19.91	842	0.99998	1
GO:0007167	enzyme linked receptor protein signaling pathway	217	1	3.48	684	0.97156	1
GO:0007169	transmembrane receptor protein tyrosine kinase signaling pathway	155	1	2.48	594	0.92048	1
GO:0007173	epidermal growth factor receptor signaling pathway	63	1	1.01	408	0.64028	1
GO:0007265	Ras protein signal transduction	185	1	2.97	637	0.95159	1
GO:0007267	cell-cell signaling	391	2	6.27	734	0.98831	1
GO:0007268	chemical synaptic transmission	234	1	3.75	699	0.97858	1
GO:0007271	synaptic transmission, cholinergic	15	1	0.24	180	0.21544	1
GO:0007276	gamete generation	759	18	12.17	66	0.05739	1
GO:0007281	germ cell development	621	16	9.95	53	0.03851	1
GO:0007292	female gamete generation	608	17	9.75	36	0.0164	1
GO:0007320	insemination	5	1	0.08	90	0.07764	1
GO:0007369	gastrulation	64	1	1.03	413	0.6461	1
GO:0007389	pattern specification process	403	3	6.46	655	0.96078	1
GO:0007399	nervous system development	904	4	14.49	831	0.99984	1
GO:0007409	axonogenesis	271	1	4.34	735	0.98847	1
GO:0007424	open tracheal system development	200	1	3.21	659	0.96226	1
GO:0007431	salivary gland development	109	1	1.75	539	0.83046	1
GO:0007444	imaginal disc development	457	3	7.33	708	0.98043	1
GO:0007447	imaginal disc pattern formation	83	1	1.33	471	0.74047	1
GO:0007450	dorsal/ventral pattern formation, imaginal disc	45	1	0.72	338	0.5178	1
GO:0007472	wing disc morphogenesis	226	2	3.62	571	0.88249	1
GO:0007476	imaginal disc-derived wing morphogenesis	220	2	3.53	557	0.87294	1
GO:0007498	mesoderm development	75	1	1.2	444	0.70424	1
GO:0007517	muscle organ development	76	1	1.22	453	0.70903	1
GO:0007525	somatic muscle development	65	1	1.04	419	0.65182	1
GO:0007560	imaginal disc morphogenesis	312	2	5	665	0.96351	1
GO:0007568	aging	140	1	2.24	582	0.89816	1
GO:0007606	sensory perception of chemical stimulus	75	1	1.2	445	0.70424	1
GO:0007610	behavior	423	3	6.78	679	0.96957	1
GO:0007611	learning or memory	139	1	2.23	579	0.89647	1
GO:0007612	learning	57	1	0.91	392	0.60334	1
GO:0007617	mating behavior	71	1	1.14	431	0.68428	1
GO:0007618	mating	75	2	1.2	248	0.33911	1
GO:0007620	copulation	11	1	0.18	143	0.16295	1
GO:0007635	chemosensory behavior	64	1	1.03	414	0.6461	1
GO:0008033	tRNA processing	71	1	1.14	432	0.68428	1
GO:0008037	cell recognition	87	1	1.39	489	0.7569	1
GO:0008038	neuron recognition	85	1	1.36	481	0.74882	1
GO:0008104	protein localization	570	3	9.14	769	0.99581	1
GO:0008150	biological_process	7299	117	117	855	1	1
GO:0008152	metabolic process	4473	56	71.7	814	0.99889	1
GO:0008219	cell death	318	2	5.1	672	0.96647	1
GO:0008306	associative learning	48	1	0.77	359	0.54076	1
GO:0008355	olfactory learning	38	1	0.61	306	0.4597	1
GO:0008380	RNA splicing	243	3	3.9	487	0.75341	1
GO:0008544	epidermis development	50	1	0.8	366	0.55546	1
GO:0008652	cellular amino acid biosynthetic process	41	1	0.66	323	0.4854	1
GO:0009056	catabolic process	768	12	12.31	382	0.58276	1
GO:0009057	macromolecule catabolic process	399	7	6.4	303	0.4592	1
GO:0009058	biosynthetic process	2009	16	32.2	838	0.9999	1
GO:0009059	macromolecule biosynthetic process	1569	11	25.15	835	0.99986	1
GO:0009069	serine family amino acid metabolic process	22	1	0.35	220	0.29954	1
GO:0009100	glycoprotein metabolic process	119	1	1.91	550	0.85613	1
GO:0009101	glycoprotein biosynthetic process	95	1	1.52	505	0.78673	1
GO:0009108	coenzyme biosynthetic process	73	1	1.17	436	0.69442	1
GO:0009112	nucleobase metabolic process	26	1	0.42	250	0.34353	1
GO:0009116	nucleoside metabolic process	48	1	0.77	360	0.54076	1
GO:0009117	nucleotide metabolic process	195	1	3.13	651	0.959	1
GO:0009164	nucleoside catabolic process	11	1	0.18	144	0.16295	1
GO:0009314	response to radiation	168	2	2.69	488	0.75612	1
GO:0009451	RNA modification	88	2	1.41	273	0.41379	1
GO:0009605	response to external stimulus	721	9	11.56	538	0.82975	1
GO:0009607	response to biotic stimulus	269	8	4.31	71	0.06661	1
GO:0009615	response to virus	44	1	0.71	336	0.5099	1
GO:0009628	response to abiotic stimulus	350	2	5.61	701	0.97876	1
GO:0009636	response to toxic substance	122	3	1.96	229	0.31106	1
GO:0009653	anatomical structure morphogenesis	1229	24	19.7	151	0.17107	1
GO:0009712	catechol-containing compound metabolic process	14	1	0.22	176	0.20263	1
GO:0009791	post-embryonic development	502	3	8.05	742	0.98927	1
GO:0009792	embryo development ending in birth or egg hatching	157	3	2.52	309	0.46292	1
GO:0009886	post-embryonic animal morphogenesis	369	2	5.91	722	0.98387	1
GO:0009888	tissue development	860	22	13.79	37	0.01706	1
GO:0009889	regulation of biosynthetic process	1065	8	17.07	781	0.99707	1
GO:0009890	negative regulation of biosynthetic process	364	2	5.83	715	0.98265	1
GO:0009891	positive regulation of biosynthetic process	385	5	6.17	477	0.74684	1
GO:0009892	negative regulation of metabolic process	628	8	10.07	516	0.8	1
GO:0009893	positive regulation of metabolic process	647	5	10.37	713	0.98186	1
GO:0009913	epidermal cell differentiation	42	1	0.67	329	0.4937	1
GO:0009953	dorsal/ventral pattern formation	129	1	2.07	567	0.87794	1
GO:0009966	regulation of signal transduction	645	3	10.34	811	0.99857	1
GO:0009967	positive regulation of signal transduction	292	2	4.68	638	0.95175	1
GO:0009987	cellular process	5560	67	89.12	851	1	1
GO:0010033	response to organic substance	394	2	6.32	737	0.98882	1
GO:0010035	response to inorganic substance	45	1	0.72	339	0.5178	1
GO:0010038	response to metal ion	33	1	0.53	276	0.41401	1
GO:0010166	wax metabolic process	13	1	0.21	167	0.18962	1
GO:0010212	response to ionizing radiation	39	1	0.63	313	0.46841	1
GO:0010259	multicellular organism aging	137	1	2.2	577	0.893	1
GO:0010332	response to gamma radiation	18	1	0.29	197	0.25264	1
GO:0010466	negative regulation of peptidase activity	23	1	0.37	225	0.31081	1
GO:0010467	gene expression	1866	18	29.91	784	0.99732	1
GO:0010468	regulation of gene expression	1188	11	19.04	738	0.98894	1
GO:0010556	regulation of macromolecule biosynthetic process	1026	8	16.45	768	0.9954	1
GO:0010557	positive regulation of macromolecule biosynthetic process	356	5	5.71	430	0.68203	1
GO:0010558	negative regulation of macromolecule biosynthetic process	353	2	5.66	704	0.97966	1
GO:0010563	negative regulation of phosphorus metabolic process	74	1	1.19	441	0.69937	1
GO:0010604	positive regulation of macromolecule metabolic process	595	5	9.54	674	0.96724	1
GO:0010605	negative regulation of macromolecule metabolic process	594	8	9.52	476	0.7467	1
GO:0010628	positive regulation of gene expression	373	5	5.98	458	0.72126	1
GO:0010631	epithelial cell migration	146	1	2.34	586	0.90775	1
GO:0010646	regulation of cell communication	724	4	11.61	800	0.99794	1
GO:0010647	positive regulation of cell communication	311	2	4.99	662	0.96299	1
GO:0010648	negative regulation of cell communication	278	1	4.46	745	0.98975	1
GO:0010817	regulation of hormone levels	61	2	0.98	198	0.25594	1
GO:0010833	telomere maintenance via telomere lengthening	5	1	0.08	91	0.07764	1
GO:0010927	cellular component assembly involved in morphogenesis	125	8	2	10	0.00085	1
GO:0012501	programmed cell death	291	2	4.66	632	0.95107	1
GO:0015031	protein transport	379	3	6.08	630	0.94712	1
GO:0015711	organic anion transport	127	3	2.04	246	0.33311	1
GO:0015833	peptide transport	386	3	6.19	634	0.9515	1
GO:0015849	organic acid transport	65	1	1.04	420	0.65182	1
GO:0015931	nucleobase-containing compound transport	114	2	1.83	364	0.54912	1
GO:0016042	lipid catabolic process	96	2	1.54	302	0.45768	1
GO:0016043	cellular component organization	2219	23	35.57	779	0.997	1
GO:0016049	cell growth	137	1	2.2	578	0.893	1
GO:0016053	organic acid biosynthetic process	100	1	1.6	521	0.8035	1
GO:0016054	organic acid catabolic process	86	1	1.38	485	0.75289	1
GO:0016055	Wnt signaling pathway	97	1	1.55	513	0.7936	1
GO:0016070	RNA metabolic process	1519	17	24.35	678	0.96865	1
GO:0016071	mRNA metabolic process	338	5	5.42	404	0.63673	1
GO:0016072	rRNA metabolic process	140	5	2.24	76	0.07386	1
GO:0016073	snRNA metabolic process	35	3	0.56	40	0.0181	1
GO:0016074	snoRNA metabolic process	9	2	0.14	23	0.00852	1
GO:0016180	snRNA processing	24	2	0.38	65	0.05591	1
GO:0016192	vesicle-mediated transport	465	1	7.45	826	0.99958	1
GO:0016310	phosphorylation	503	2	8.06	798	0.99785	1
GO:0016331	morphogenesis of embryonic epithelium	108	2	1.73	341	0.51984	1
GO:0016458	gene silencing	165	1	2.64	607	0.93259	1
GO:0016477	cell migration	266	2	4.26	603	0.93105	1
GO:0016569	covalent chromatin modification	176	1	2.82	627	0.94381	1
GO:0016570	histone modification	172	1	2.76	616	0.93996	1
GO:0018193	peptidyl-amino acid modification	282	2	4.52	628	0.9446	1
GO:0018205	peptidyl-lysine modification	133	1	2.13	572	0.88571	1
GO:0018208	peptidyl-proline modification	23	1	0.37	226	0.31081	1
GO:0018393	internal peptidyl-lysine acetylation	75	1	1.2	446	0.70424	1
GO:0018394	peptidyl-lysine acetylation	75	1	1.2	447	0.70424	1
GO:0018958	phenol-containing compound metabolic process	61	3	0.98	77	0.07399	1
GO:0019098	reproductive behavior	84	1	1.35	473	0.74468	1
GO:0019219	regulation of nucleobase-containing compound metabolic process	1015	8	16.27	765	0.99479	1
GO:0019220	regulation of phosphate metabolic process	254	2	4.07	590	0.91892	1
GO:0019222	regulation of metabolic process	1646	13	26.38	825	0.99957	1
GO:0019438	aromatic compound biosynthetic process	1143	12	18.32	670	0.96586	1
GO:0019439	aromatic compound catabolic process	156	6	2.5	55	0.03894	1
GO:0019538	protein metabolic process	1877	18	30.09	787	0.9976	1
GO:0019637	organophosphate metabolic process	339	1	5.43	775	0.99634	1
GO:0019722	calcium-mediated signaling	17	1	0.27	189	0.24044	1
GO:0019748	secondary metabolic process	82	2	1.31	266	0.37977	1
GO:0019752	carboxylic acid metabolic process	316	4	5.07	483	0.75252	1
GO:0019932	second-messenger-mediated signaling	53	1	0.85	375	0.57664	1
GO:0019953	sexual reproduction	829	20	13.29	56	0.03953	1
GO:0022008	neurogenesis	716	4	11.48	795	0.9977	1
GO:0022411	cellular component disassembly	109	2	1.75	345	0.52481	1
GO:0022412	cellular process involved in reproduction in multicellular organism	726	17	11.64	75	0.07037	1
GO:0022414	reproductive process	924	21	14.81	67	0.06033	1
GO:0022607	cellular component assembly	945	12	15.15	544	0.84501	1
GO:0022610	biological adhesion	159	4	2.55	193	0.25096	1
GO:0022612	gland morphogenesis	81	1	1.3	467	0.73185	1
GO:0022613	ribonucleoprotein complex biogenesis	272	6	4.36	203	0.27035	1
GO:0022618	ribonucleoprotein complex assembly	120	2	1.92	380	0.57714	1
GO:0023051	regulation of signaling	730	4	11.7	803	0.9981	1
GO:0023052	signaling	1426	7	22.86	846	0.99999	1
GO:0023056	positive regulation of signaling	311	2	4.99	663	0.96299	1
GO:0023057	negative regulation of signaling	278	1	4.46	746	0.98975	1
GO:0030029	actin filament-based process	250	1	4.01	719	0.98361	1
GO:0030030	cell projection organization	496	2	7.95	788	0.9976	1
GO:0030036	actin cytoskeleton organization	238	1	3.82	706	0.97997	1
GO:0030097	hemopoiesis	72	1	1.15	434	0.68939	1
GO:0030111	regulation of Wnt signaling pathway	75	1	1.2	448	0.70424	1
GO:0030154	cell differentiation	1361	22	21.82	343	0.52048	1
GO:0030162	regulation of proteolysis	105	1	1.68	532	0.81896	1
GO:0030177	positive regulation of Wnt signaling pathway	35	1	0.56	286	0.43273	1
GO:0030182	neuron differentiation	601	4	9.63	743	0.98952	1
GO:0030203	glycosaminoglycan metabolic process	23	1	0.37	227	0.31081	1
GO:0030258	lipid modification	78	1	1.25	455	0.71838	1
GO:0030262	apoptotic nuclear changes	9	2	0.14	24	0.00852	1
GO:0030534	adult behavior	124	1	1.99	555	0.86748	1
GO:0030703	eggshell formation	107	16	1.72	2	8.6e-12	1
GO:0030704	vitelline membrane formation	11	2	0.18	32	0.01275	1
GO:0030707	ovarian follicle cell development	282	16	4.52	5	9.6e-06	1
GO:0030855	epithelial cell differentiation	347	18	5.56	4	8.8e-06	1
GO:0031109	microtubule polymerization or depolymerization	37	1	0.59	297	0.45085	1
GO:0031123	RNA 3'-end processing	70	2	1.12	222	0.30958	1
GO:0031126	snoRNA 3'-end processing	7	2	0.11	15	0.00508	1
GO:0031175	neuron projection development	388	1	6.22	809	0.99841	1
GO:0031323	regulation of cellular metabolic process	1501	10	24.06	837	0.99989	1
GO:0031324	negative regulation of cellular metabolic process	510	4	8.18	675	0.96794	1
GO:0031325	positive regulation of cellular metabolic process	609	5	9.76	685	0.97198	1
GO:0031326	regulation of cellular biosynthetic process	1060	8	16.99	778	0.9969	1
GO:0031327	negative regulation of cellular biosynthetic process	362	2	5.8	714	0.98214	1
GO:0031328	positive regulation of cellular biosynthetic process	385	5	6.17	478	0.74684	1
GO:0031347	regulation of defense response	115	1	1.84	545	0.84636	1
GO:0031348	negative regulation of defense response	32	1	0.51	270	0.40442	1
GO:0031399	regulation of protein modification process	296	1	4.74	754	0.99243	1
GO:0031400	negative regulation of protein modification process	84	1	1.35	474	0.74468	1
GO:0031497	chromatin assembly	40	1	0.64	319	0.47697	1
GO:0031503	protein-containing complex localization	66	1	1.06	422	0.65745	1
GO:0031644	regulation of neurological system process	13	1	0.21	168	0.18962	1
GO:0032196	transposition	16	1	0.26	183	0.22804	1
GO:0032200	telomere organization	29	1	0.46	264	0.37471	1
GO:0032268	regulation of cellular protein metabolic process	514	2	8.24	804	0.99818	1
GO:0032269	negative regulation of cellular protein metabolic process	189	2	3.03	529	0.81148	1
GO:0032446	protein modification by small protein conjugation	168	1	2.69	612	0.93585	1
GO:0032501	multicellular organismal process	2542	45	40.75	185	0.23014	1
GO:0032774	RNA biosynthetic process	936	8	15	733	0.9876	1
GO:0032787	monocarboxylic acid metabolic process	130	1	2.08	569	0.87993	1
GO:0032940	secretion by cell	175	1	2.81	625	0.94287	1
GO:0032989	cellular component morphogenesis	570	10	9.14	282	0.43136	1
GO:0032990	cell part morphogenesis	374	1	6	802	0.99798	1
GO:0033036	macromolecule localization	725	4	11.62	801	0.99797	1
GO:0033554	cellular response to stress	492	2	7.89	786	0.99745	1
GO:0033673	negative regulation of kinase activity	26	1	0.42	251	0.34353	1
GO:0033750	ribosome localization	11	1	0.18	145	0.16295	1
GO:0034220	ion transmembrane transport	213	1	3.41	681	0.9696	1
GO:0034440	lipid oxidation	36	1	0.58	292	0.44186	1
GO:0034470	ncRNA processing	226	6	3.62	134	0.15439	1
GO:0034472	snRNA 3'-end processing	22	2	0.35	61	0.04777	1
GO:0034613	cellular protein localization	440	2	7.05	760	0.99437	1
GO:0034622	cellular protein-containing complex assembly	379	4	6.08	554	0.86444	1
GO:0034641	cellular nitrogen compound metabolic process	2354	25	37.73	777	0.9968	1
GO:0034645	cellular macromolecule biosynthetic process	1546	11	24.78	829	0.99981	1
GO:0034654	nucleobase-containing compound biosynthetic process	1091	10	17.49	729	0.98675	1
GO:0034655	nucleobase-containing compound catabolic process	141	6	2.26	45	0.02543	1
GO:0034656	nucleobase-containing small molecule catabolic process	11	1	0.18	146	0.16295	1
GO:0034660	ncRNA metabolic process	295	7	4.73	170	0.1942	1
GO:0034661	ncRNA catabolic process	15	2	0.24	43	0.02334	1
GO:0034724	DNA replication-independent nucleosome organization	7	1	0.11	114	0.10699	1
GO:0034728	nucleosome organization	48	1	0.77	361	0.54076	1
GO:0034754	cellular hormone metabolic process	34	1	0.55	280	0.42344	1
GO:0035107	appendage morphogenesis	262	2	4.2	601	0.92721	1
GO:0035114	imaginal disc-derived appendage morphogenesis	260	2	4.17	597	0.92522	1
GO:0035120	post-embryonic appendage morphogenesis	256	2	4.1	595	0.92107	1
GO:0035166	post-embryonic hemopoiesis	36	1	0.58	293	0.44186	1
GO:0035220	wing disc development	306	3	4.91	559	0.87465	1
GO:0035222	wing disc pattern formation	60	1	0.96	399	0.62226	1
GO:0035239	tube morphogenesis	396	2	6.35	741	0.98914	1
GO:0035264	multicellular organism growth	43	1	0.69	332	0.50186	1
GO:0035272	exocrine system development	109	1	1.75	540	0.83046	1
GO:0035295	tube development	568	6	9.1	585	0.90179	1
GO:0035315	hair cell differentiation	40	1	0.64	320	0.47697	1
GO:0035316	non-sensory hair organization	40	1	0.64	321	0.47697	1
GO:0035317	imaginal disc-derived wing hair organization	39	1	0.63	314	0.46841	1
GO:0035337	fatty-acyl-CoA metabolic process	16	1	0.26	184	0.22804	1
GO:0035383	thioester metabolic process	34	1	0.55	281	0.42344	1
GO:0035556	intracellular signal transduction	572	3	9.17	770	0.99593	1
GO:0035803	egg coat formation	11	2	0.18	33	0.01275	1
GO:0036211	protein modification process	1011	5	16.21	833	0.99985	1
GO:0038127	ERBB signaling pathway	63	1	1.01	409	0.64028	1
GO:0040007	growth	385	1	6.17	805	0.99833	1
GO:0040008	regulation of growth	261	1	4.18	728	0.98637	1
GO:0040011	locomotion	508	3	8.14	748	0.99011	1
GO:0040014	regulation of multicellular organism growth	41	1	0.66	324	0.4854	1
GO:0040029	regulation of gene expression, epigenetic	157	1	2.52	596	0.92306	1
GO:0042048	olfactory behavior	60	1	0.96	400	0.62226	1
GO:0042133	neurotransmitter metabolic process	27	1	0.43	255	0.35409	1
GO:0042221	response to chemical	788	7	12.63	691	0.97525	1
GO:0042254	ribosome biogenesis	197	5	3.16	178	0.20861	1
GO:0042278	purine nucleoside metabolic process	27	1	0.43	256	0.35409	1
GO:0042326	negative regulation of phosphorylation	64	1	1.03	415	0.6461	1
GO:0042330	taxis	277	1	4.44	744	0.98958	1
GO:0042335	cuticle development	136	6	2.18	42	0.02173	1
GO:0042386	hemocyte differentiation	36	1	0.58	294	0.44186	1
GO:0042398	cellular modified amino acid biosynthetic process	12	1	0.19	159	0.17639	1
GO:0042440	pigment metabolic process	111	2	1.78	355	0.53463	1
GO:0042445	hormone metabolic process	49	1	0.79	362	0.54817	1
GO:0042493	response to drug	140	4	2.24	163	0.18665	1
GO:0042558	pteridine-containing compound metabolic process	17	1	0.27	190	0.24044	1
GO:0042559	pteridine-containing compound biosynthetic process	11	1	0.18	147	0.16295	1
GO:0042592	homeostatic process	385	5	6.17	479	0.74684	1
GO:0042886	amide transport	389	3	6.24	641	0.95327	1
GO:0043043	peptide biosynthetic process	431	2	6.91	759	0.99355	1
GO:0043062	extracellular structure organization	57	3	0.91	69	0.06294	1
GO:0043086	negative regulation of catalytic activity	68	2	1.09	216	0.2977	1
GO:0043144	snoRNA processing	8	2	0.13	18	0.0067	1
GO:0043170	macromolecule metabolic process	3290	37	52.74	817	0.99898	1
GO:0043207	response to external biotic stimulus	269	8	4.31	72	0.06661	1
GO:0043412	macromolecule modification	1100	7	17.63	821	0.99937	1
GO:0043413	macromolecule glycosylation	80	1	1.28	463	0.72743	1
GO:0043436	oxoacid metabolic process	332	4	5.32	503	0.78616	1
GO:0043473	pigmentation	98	2	1.57	311	0.46836	1
GO:0043543	protein acylation	96	1	1.54	510	0.79019	1
GO:0043549	regulation of kinase activity	102	1	1.64	527	0.80984	1
GO:0043603	cellular amide metabolic process	541	5	8.67	623	0.94136	1
GO:0043628	ncRNA 3'-end processing	29	2	0.46	93	0.07814	1
GO:0043933	protein-containing complex subunit organization	524	4	8.4	686	0.97286	1
GO:0044057	regulation of system process	47	2	0.75	152	0.17354	1
GO:0044085	cellular component biogenesis	1107	16	17.74	454	0.7134	1
GO:0044092	negative regulation of molecular function	88	2	1.41	274	0.41379	1
GO:0044237	cellular metabolic process	3879	39	62.18	847	1	1
GO:0044238	primary metabolic process	3857	43	61.83	834	0.99985	1
GO:0044248	cellular catabolic process	696	10	11.16	435	0.68953	1
GO:0044249	cellular biosynthetic process	1954	15	31.32	839	0.99993	1
GO:0044255	cellular lipid metabolic process	302	2	4.84	649	0.95802	1
GO:0044260	cellular macromolecule metabolic process	2602	22	41.71	843	0.99998	1
GO:0044265	cellular macromolecule catabolic process	334	5	5.35	401	0.62616	1
GO:0044267	cellular protein metabolic process	1596	8	25.58	849	1	1
GO:0044270	cellular nitrogen compound catabolic process	153	6	2.45	51	0.03594	1
GO:0044271	cellular nitrogen compound biosynthetic process	1531	13	24.54	808	0.9984	1
GO:0044281	small molecule metabolic process	667	6	10.69	661	0.96289	1
GO:0044282	small molecule catabolic process	119	2	1.91	374	0.57255	1
GO:0044283	small molecule biosynthetic process	194	1	3.11	650	0.95831	1
GO:0044550	secondary metabolite biosynthetic process	26	2	0.42	70	0.0645	1
GO:0044703	multi-organism reproductive process	829	20	13.29	57	0.03953	1
GO:0044706	multi-multicellular organism process	5	1	0.08	92	0.07764	1
GO:0045087	innate immune response	164	1	2.63	604	0.93147	1
GO:0045088	regulation of innate immune response	81	1	1.3	468	0.73185	1
GO:0045184	establishment of protein localization	395	3	6.33	648	0.95664	1
GO:0045595	regulation of cell differentiation	290	1	4.65	753	0.99162	1
GO:0045596	negative regulation of cell differentiation	95	1	1.52	506	0.78673	1
GO:0045610	regulation of hemocyte differentiation	23	1	0.37	228	0.31081	1
GO:0045814	negative regulation of gene expression, epigenetic	99	1	1.59	518	0.80025	1
GO:0045859	regulation of protein kinase activity	84	1	1.35	475	0.74468	1
GO:0045861	negative regulation of proteolysis	32	1	0.51	271	0.40442	1
GO:0045927	positive regulation of growth	91	1	1.46	495	0.7723	1
GO:0045934	negative regulation of nucleobase-containing compound metabolic process	311	2	4.99	664	0.96299	1
GO:0045935	positive regulation of nucleobase-containing compound metabolic process	342	5	5.48	418	0.64713	1
GO:0045936	negative regulation of phosphate metabolic process	74	1	1.19	442	0.69937	1
GO:0046148	pigment biosynthetic process	65	2	1.04	208	0.27982	1
GO:0046189	phenol-containing compound biosynthetic process	13	2	0.21	38	0.01771	1
GO:0046394	carboxylic acid biosynthetic process	100	1	1.6	522	0.8035	1
GO:0046395	carboxylic acid catabolic process	86	1	1.38	486	0.75289	1
GO:0046483	heterocycle metabolic process	2006	23	32.16	710	0.98089	1
GO:0046530	photoreceptor cell differentiation	166	1	2.66	608	0.9337	1
GO:0046677	response to antibiotic	71	2	1.14	231	0.31551	1
GO:0046700	heterocycle catabolic process	155	6	2.48	52	0.03792	1
GO:0046785	microtubule polymerization	20	1	0.32	206	0.27647	1
GO:0046903	secretion	196	1	3.14	652	0.95967	1
GO:0046942	carboxylic acid transport	64	1	1.03	416	0.6461	1
GO:0048066	developmental pigmentation	93	2	1.49	289	0.44144	1
GO:0048193	Golgi vesicle transport	118	1	1.89	548	0.85374	1
GO:0048332	mesoderm morphogenesis	21	1	0.34	213	0.2881	1
GO:0048333	mesodermal cell differentiation	6	1	0.1	104	0.09244	1
GO:0048477	oogenesis	552	16	8.85	34	0.0145	1
GO:0048511	rhythmic process	130	1	2.08	570	0.87993	1
GO:0048513	animal organ development	968	7	15.52	776	0.99671	1
GO:0048519	negative regulation of biological process	1129	11	18.1	709	0.98045	1
GO:0048522	positive regulation of cellular process	1032	7	16.54	810	0.99849	1
GO:0048523	negative regulation of cellular process	967	6	15.5	815	0.99893	1
GO:0048534	hematopoietic or lymphoid organ development	82	1	1.31	470	0.73619	1
GO:0048542	lymph gland development	46	1	0.74	349	0.52558	1
GO:0048563	post-embryonic animal organ morphogenesis	312	2	5	666	0.96351	1
GO:0048565	digestive tract development	85	3	1.36	136	0.15536	1
GO:0048568	embryonic organ development	46	1	0.74	350	0.52558	1
GO:0048569	post-embryonic animal organ development	369	3	5.91	617	0.94023	1
GO:0048583	regulation of response to stimulus	818	5	13.11	796	0.99783	1
GO:0048584	positive regulation of response to stimulus	377	2	6.04	726	0.98565	1
GO:0048585	negative regulation of response to stimulus	304	1	4.87	757	0.99338	1
GO:0048589	developmental growth	303	1	4.86	756	0.99327	1
GO:0048592	eye morphogenesis	257	1	4.12	724	0.98542	1
GO:0048598	embryonic morphogenesis	192	3	3.08	390	0.599	1
GO:0048609	multicellular organismal reproductive process	827	20	13.26	54	0.03868	1
GO:0048638	regulation of developmental growth	188	1	3.01	642	0.95394	1
GO:0048639	positive regulation of developmental growth	70	1	1.12	428	0.67909	1
GO:0048666	neuron development	512	3	8.21	750	0.99063	1
GO:0048667	cell morphogenesis involved in neuron differentiation	357	1	5.72	783	0.9973	1
GO:0048699	generation of neurons	679	4	10.88	773	0.99621	1
GO:0048707	instar larval or pupal morphogenesis	359	2	5.75	712	0.98135	1
GO:0048729	tissue morphogenesis	494	4	7.92	658	0.96132	1
GO:0048731	system development	1416	8	22.7	841	0.99997	1
GO:0048732	gland development	151	1	2.42	588	0.91505	1
GO:0048736	appendage development	271	2	4.34	611	0.93559	1
GO:0048737	imaginal disc-derived appendage development	267	2	4.28	606	0.93198	1
GO:0048749	compound eye development	304	1	4.87	758	0.99338	1
GO:0048812	neuron projection morphogenesis	364	1	5.83	789	0.99761	1
GO:0048856	anatomical structure development	2093	38	33.55	177	0.20645	1
GO:0048858	cell projection morphogenesis	366	1	5.87	793	0.99769	1
GO:0048869	cellular developmental process	1403	23	22.49	326	0.48958	1
GO:0048870	cell motility	279	2	4.47	624	0.94227	1
GO:0048871	multicellular organismal homeostasis	54	1	0.87	384	0.58348	1
GO:0048872	homeostasis of number of cells	25	1	0.4	245	0.33279	1
GO:0048878	chemical homeostasis	223	2	3.57	564	0.8778	1
GO:0050657	nucleic acid transport	95	1	1.52	507	0.78673	1
GO:0050658	RNA transport	95	1	1.52	508	0.78673	1
GO:0050776	regulation of immune response	128	1	2.05	561	0.87591	1
GO:0050777	negative regulation of immune response	38	1	0.61	307	0.4597	1
GO:0050790	regulation of catalytic activity	292	2	4.68	639	0.95175	1
GO:0050793	regulation of developmental process	579	3	9.28	774	0.99631	1
GO:0050794	regulation of cellular process	2743	16	43.97	854	1	1
GO:0050795	regulation of behavior	66	1	1.06	423	0.65745	1
GO:0050801	ion homeostasis	134	2	2.15	405	0.63754	1
GO:0050804	modulation of chemical synaptic transmission	94	1	1.51	500	0.78321	1
GO:0050877	nervous system process	365	4	5.85	543	0.84411	1
GO:0050890	cognition	139	1	2.23	580	0.89647	1
GO:0050896	response to stimulus	2233	23	35.79	785	0.99738	1
GO:0050954	sensory perception of mechanical stimulus	55	1	0.88	385	0.59021	1
GO:0051056	regulation of small GTPase mediated signal transduction	128	1	2.05	562	0.87591	1
GO:0051093	negative regulation of developmental process	168	1	2.69	613	0.93585	1
GO:0051094	positive regulation of developmental process	168	1	2.69	614	0.93585	1
GO:0051128	regulation of cellular component organization	675	1	10.82	845	0.99999	1
GO:0051169	nuclear transport	109	2	1.75	346	0.52481	1
GO:0051171	regulation of nitrogen compound metabolic process	1445	10	23.16	828	0.99977	1
GO:0051172	negative regulation of nitrogen compound metabolic process	482	4	7.73	645	0.95556	1
GO:0051173	positive regulation of nitrogen compound metabolic process	587	5	9.41	667	0.96421	1
GO:0051174	regulation of phosphorus metabolic process	254	2	4.07	591	0.91892	1
GO:0051179	localization	1791	15	28.71	824	0.99949	1
GO:0051186	cofactor metabolic process	193	2	3.09	533	0.82068	1
GO:0051188	cofactor biosynthetic process	87	1	1.39	490	0.7569	1
GO:0051234	establishment of localization	1418	12	22.73	794	0.9977	1
GO:0051236	establishment of RNA localization	96	1	1.54	511	0.79019	1
GO:0051239	regulation of multicellular organismal process	579	5	9.28	656	0.96094	1
GO:0051246	regulation of protein metabolic process	549	2	8.8	816	0.99895	1
GO:0051248	negative regulation of protein metabolic process	190	2	3.05	531	0.81382	1
GO:0051252	regulation of RNA metabolic process	964	8	15.45	751	0.99082	1
GO:0051253	negative regulation of RNA metabolic process	293	2	4.7	640	0.95241	1
GO:0051254	positive regulation of RNA metabolic process	323	5	5.18	387	0.59619	1
GO:0051258	protein polymerization	78	1	1.25	456	0.71838	1
GO:0051276	chromosome organization	503	4	8.06	668	0.96518	1
GO:0051336	regulation of hydrolase activity	164	1	2.63	605	0.93147	1
GO:0051338	regulation of transferase activity	117	1	1.88	546	0.85132	1
GO:0051346	negative regulation of hydrolase activity	39	1	0.63	315	0.46841	1
GO:0051348	negative regulation of transferase activity	28	1	0.45	259	0.36448	1
GO:0051640	organelle localization	207	1	3.32	671	0.96641	1
GO:0051641	cellular localization	814	4	13.05	822	0.99942	1
GO:0051649	establishment of localization in cell	653	4	10.47	763	0.99465	1
GO:0051656	establishment of organelle localization	168	1	2.69	615	0.93585	1
GO:0051674	localization of cell	284	2	4.55	629	0.9461	1
GO:0051704	multi-organism process	1066	28	17.09	13	0.00474	1
GO:0051707	response to other organism	269	8	4.31	73	0.06661	1
GO:0051716	cellular response to stimulus	1596	8	25.58	850	1	1
GO:0052547	regulation of peptidase activity	50	1	0.8	367	0.55546	1
GO:0052548	regulation of endopeptidase activity	45	1	0.72	340	0.5178	1
GO:0055076	transition metal ion homeostasis	38	1	0.61	308	0.4597	1
GO:0055080	cation homeostasis	126	2	2.02	393	0.60388	1
GO:0055086	nucleobase-containing small molecule metabolic process	255	3	4.09	499	0.78197	1
GO:0055123	digestive system development	85	3	1.36	137	0.15536	1
GO:0060070	canonical Wnt signaling pathway	66	1	1.06	424	0.65745	1
GO:0060249	anatomical structure homeostasis	125	2	2	391	0.59951	1
GO:0060255	regulation of macromolecule metabolic process	1530	13	24.53	807	0.99838	1
GO:0060429	epithelium development	796	22	12.76	19	0.00723	1
GO:0060538	skeletal muscle organ development	42	1	0.67	330	0.4937	1
GO:0060541	respiratory system development	205	1	3.29	669	0.96527	1
GO:0060562	epithelial tube morphogenesis	368	2	5.9	720	0.98363	1
GO:0060612	adipose tissue development	7	1	0.11	115	0.10699	1
GO:0060795	cell fate commitment involved in formation of primary germ layer	10	1	0.16	133	0.1493	1
GO:0060828	regulation of canonical Wnt signaling pathway	55	1	0.88	386	0.59021	1
GO:0061061	muscle structure development	186	2	2.98	524	0.80432	1
GO:0061448	connective tissue development	8	1	0.13	117	0.12132	1
GO:0061564	axon development	283	1	4.54	749	0.99058	1
GO:0061919	process utilizing autophagic mechanism	140	1	2.24	583	0.89816	1
GO:0065003	protein-containing complex assembly	428	4	6.86	589	0.9188	1
GO:0065004	protein-DNA complex assembly	58	1	0.93	394	0.60975	1
GO:0065007	biological regulation	3317	28	53.17	853	1	1
GO:0065008	regulation of biological quality	1049	9	16.82	752	0.99108	1
GO:0065009	regulation of molecular function	347	2	5.56	697	0.97782	1
GO:0070085	glycosylation	80	1	1.28	464	0.72743	1
GO:0070647	protein modification by small protein conjugation or removal	220	1	3.53	687	0.97295	1
GO:0070727	cellular macromolecule localization	498	2	7.98	792	0.99767	1
GO:0070887	cellular response to chemical stimulus	314	1	5.03	761	0.99441	1
GO:0070925	organelle assembly	269	2	4.31	609	0.93381	1
GO:0071025	RNA surveillance	14	2	0.22	41	0.02044	1
GO:0071027	nuclear RNA surveillance	13	2	0.21	39	0.01771	1
GO:0071103	DNA conformation change	100	1	1.6	523	0.8035	1
GO:0071166	ribonucleoprotein complex localization	47	1	0.75	353	0.53323	1
GO:0071214	cellular response to abiotic stimulus	63	1	1.01	410	0.64028	1
GO:0071426	ribonucleoprotein complex export from nucleus	47	1	0.75	354	0.53323	1
GO:0071428	rRNA-containing ribonucleoprotein complex export from nucleus	12	1	0.19	160	0.17639	1
GO:0071478	cellular response to radiation	53	1	0.85	376	0.57664	1
GO:0071479	cellular response to ionizing radiation	17	1	0.27	191	0.24044	1
GO:0071702	organic substance transport	617	7	9.89	560	0.87591	1
GO:0071704	organic substance metabolic process	4118	48	66.01	827	0.99973	1
GO:0071705	nitrogen compound transport	491	6	7.87	526	0.80836	1
GO:0071824	protein-DNA complex subunit organization	91	1	1.46	496	0.7723	1
GO:0071826	ribonucleoprotein complex subunit organization	130	2	2.08	397	0.62099	1
GO:0071840	cellular component organization or biogenesis	2363	26	37.88	762	0.99444	1
GO:0071897	DNA biosynthetic process	36	1	0.58	295	0.44186	1
GO:0072329	monocarboxylic acid catabolic process	49	1	0.79	363	0.54817	1
GO:0072359	circulatory system development	88	3	1.41	150	0.167	1
GO:0072521	purine-containing compound metabolic process	178	2	2.85	502	0.78403	1
GO:0072523	purine-containing compound catabolic process	15	1	0.24	181	0.21544	1
GO:0072593	reactive oxygen species metabolic process	27	1	0.43	257	0.35409	1
GO:0072657	protein localization to membrane	93	1	1.49	498	0.77963	1
GO:0080090	regulation of primary metabolic process	1461	10	23.42	830	0.99981	1
GO:0080134	regulation of response to stress	227	1	3.64	692	0.97593	1
GO:0085029	extracellular matrix assembly	17	2	0.27	48	0.02961	1
GO:0090066	regulation of anatomical structure size	208	1	3.33	673	0.96696	1
GO:0090130	tissue migration	154	1	2.47	593	0.91916	1
GO:0090132	epithelium migration	146	1	2.34	587	0.90775	1
GO:0090150	establishment of protein localization to membrane	53	1	0.85	377	0.57664	1
GO:0090257	regulation of muscle system process	11	1	0.18	148	0.16295	1
GO:0090304	nucleic acid metabolic process	1700	20	27.25	653	0.96017	1
GO:0090305	nucleic acid phosphodiester bond hydrolysis	69	2	1.11	221	0.30365	1
GO:0090407	organophosphate biosynthetic process	182	1	2.92	631	0.94913	1
GO:0090596	sensory organ morphogenesis	257	1	4.12	725	0.98542	1
GO:0097194	execution phase of apoptosis	17	2	0.27	49	0.02961	1
GO:0097305	response to alcohol	108	2	1.73	342	0.51984	1
GO:0097435	supramolecular fiber organization	199	2	3.19	542	0.83372	1
GO:0097485	neuron projection guidance	220	1	3.53	688	0.97295	1
GO:0097659	nucleic acid-templated transcription	933	8	14.96	732	0.9872	1
GO:0098542	defense response to other organism	204	3	3.27	406	0.64025	1
GO:0098609	cell-cell adhesion	89	2	1.43	277	0.41938	1
GO:0098656	anion transmembrane transport	70	1	1.12	429	0.67909	1
GO:0098742	cell-cell adhesion via plasma-membrane adhesion molecules	44	2	0.71	139	0.15648	1
GO:0098771	inorganic ion homeostasis	128	2	2.05	396	0.61251	1
GO:0098916	anterograde trans-synaptic signaling	234	1	3.75	700	0.97858	1
GO:0099177	regulation of trans-synaptic signaling	94	1	1.51	501	0.78321	1
GO:0099536	synaptic signaling	236	1	3.78	703	0.97929	1
GO:0099537	trans-synaptic signaling	235	1	3.77	702	0.97894	1
GO:0104004	cellular response to environmental stimulus	63	1	1.01	411	0.64028	1
GO:0120036	plasma membrane bounded cell projection organization	485	2	7.77	782	0.99716	1
GO:0120039	plasma membrane bounded cell projection morphogenesis	365	1	5.85	790	0.99765	1
GO:0198738	cell-cell signaling by wnt	107	1	1.72	536	0.8248	1
GO:1901071	glucosamine-containing compound metabolic process	63	1	1.01	412	0.64028	1
GO:1901135	carbohydrate derivative metabolic process	456	4	7.31	618	0.94032	1
GO:1901136	carbohydrate derivative catabolic process	62	2	0.99	199	0.26191	1
GO:1901137	carbohydrate derivative biosynthetic process	238	1	3.82	707	0.97997	1
GO:1901184	regulation of ERBB signaling pathway	46	1	0.74	351	0.52558	1
GO:1901264	carbohydrate derivative transport	19	1	0.3	202	0.26465	1
GO:1901293	nucleoside phosphate biosynthetic process	98	1	1.57	515	0.79696	1
GO:1901360	organic cyclic compound metabolic process	2100	26	33.66	647	0.95645	1
GO:1901361	organic cyclic compound catabolic process	164	6	2.63	60	0.04773	1
GO:1901564	organonitrogen compound metabolic process	2387	25	38.26	791	0.99766	1
GO:1901565	organonitrogen compound catabolic process	388	4	6.22	563	0.87628	1
GO:1901568	fatty acid derivative metabolic process	24	1	0.38	239	0.32189	1
GO:1901570	fatty acid derivative biosynthetic process	21	1	0.34	214	0.2881	1
GO:1901575	organic substance catabolic process	633	11	10.15	288	0.43614	1
GO:1901576	organic substance biosynthetic process	1984	16	31.8	836	0.99987	1
GO:1901605	alpha-amino acid metabolic process	88	1	1.41	493	0.76085	1
GO:1901607	alpha-amino acid biosynthetic process	37	1	0.59	298	0.45085	1
GO:1901615	organic hydroxy compound metabolic process	128	3	2.05	247	0.33753	1
GO:1901617	organic hydroxy compound biosynthetic process	48	2	0.77	161	0.17929	1
GO:1901657	glycosyl compound metabolic process	51	1	0.82	370	0.56264	1
GO:1901658	glycosyl compound catabolic process	13	1	0.21	169	0.18962	1
GO:1901700	response to oxygen-containing compound	219	2	3.51	556	0.87128	1
GO:1902531	regulation of intracellular signal transduction	327	2	5.24	683	0.97048	1
GO:1902679	negative regulation of RNA biosynthetic process	277	2	4.44	620	0.94066	1
GO:1902680	positive regulation of RNA biosynthetic process	313	5	5.02	372	0.56785	1
GO:1903506	regulation of nucleic acid-templated transcription	872	8	13.98	694	0.97598	1
GO:1903507	negative regulation of nucleic acid-templated transcription	277	2	4.44	621	0.94066	1
GO:1903508	positive regulation of nucleic acid-templated transcription	313	5	5.02	373	0.56785	1
GO:1903825	organic acid transmembrane transport	37	1	0.59	299	0.45085	1
GO:1905039	carboxylic acid transmembrane transport	37	1	0.59	300	0.45085	1
GO:1905114	cell surface receptor signaling pathway involved in cell-cell signaling	102	1	1.64	528	0.80984	1
GO:2000026	regulation of multicellular organismal development	428	1	6.86	820	0.9992	1
GO:2000112	regulation of cellular macromolecule biosynthetic process	1021	8	16.37	767	0.99513	1
GO:2000113	negative regulation of cellular macromolecule biosynthetic process	353	2	5.66	705	0.97966	1
GO:2001141	regulation of RNA biosynthetic process	872	8	13.98	695	0.97598	1
GO:0000002	mitochondrial genome maintenance	10	0	0.16	856	1	1
GO:0000018	regulation of DNA recombination	15	0	0.24	857	1	1
GO:0000022	mitotic spindle elongation	10	0	0.16	858	1	1
GO:0000027	ribosomal large subunit assembly	20	0	0.32	859	1	1
GO:0000028	ribosomal small subunit assembly	14	0	0.22	860	1	1
GO:0000038	very long-chain fatty acid metabolic process	19	0	0.3	861	1	1
GO:0000041	transition metal ion transport	29	0	0.46	862	1	1
GO:0000045	autophagosome assembly	33	0	0.53	863	1	1
GO:0000055	ribosomal large subunit export from nucleus	7	0	0.11	864	1	1
GO:0000060	protein import into nucleus, translocation	12	0	0.19	865	1	1
GO:0000070	mitotic sister chromatid segregation	96	0	1.54	866	1	1
GO:0000075	cell cycle checkpoint	58	0	0.93	867	1	1
GO:0000076	DNA replication checkpoint	14	0	0.22	868	1	1
GO:0000077	DNA damage checkpoint	34	0	0.55	869	1	1
GO:0000079	regulation of cyclin-dependent protein serine/threonine kinase activity	17	0	0.27	870	1	1
GO:0000082	G1/S transition of mitotic cell cycle	34	0	0.55	871	1	1
GO:0000086	G2/M transition of mitotic cell cycle	34	0	0.55	872	1	1
GO:0000097	sulfur amino acid biosynthetic process	10	0	0.16	873	1	1
GO:0000122	negative regulation of transcription by RNA polymerase II	134	0	2.15	874	1	1
GO:0000132	establishment of mitotic spindle orientation	16	0	0.26	875	1	1
GO:0000165	MAPK cascade	149	0	2.39	876	1	1
GO:0000184	nuclear-transcribed mRNA catabolic process, nonsense-mediated decay	14	0	0.22	877	1	1
GO:0000186	activation of MAPKK activity	7	0	0.11	878	1	1
GO:0000187	activation of MAPK activity	9	0	0.14	879	1	1
GO:0000209	protein polyubiquitination	63	0	1.01	880	1	1
GO:0000212	meiotic spindle organization	30	0	0.48	881	1	1
GO:0000245	spliceosomal complex assembly	21	0	0.34	882	1	1
GO:0000266	mitochondrial fission	12	0	0.19	883	1	1
GO:0000271	polysaccharide biosynthetic process	16	0	0.26	884	1	1
GO:0000272	polysaccharide catabolic process	13	0	0.21	885	1	1
GO:0000280	nuclear division	262	0	4.2	886	1	1
GO:0000281	mitotic cytokinesis	54	0	0.87	887	1	1
GO:0000289	nuclear-transcribed mRNA poly(A) tail shortening	13	0	0.21	888	1	1
GO:0000302	response to reactive oxygen species	22	0	0.35	889	1	1
GO:0000335	negative regulation of transposition, DNA-mediated	6	0	0.1	890	1	1
GO:0000337	regulation of transposition, DNA-mediated	6	0	0.1	891	1	1
GO:0000338	protein deneddylation	9	0	0.14	892	1	1
GO:0000380	alternative mRNA splicing, via spliceosome	74	0	1.19	893	1	1
GO:0000381	regulation of alternative mRNA splicing, via spliceosome	74	0	1.19	894	1	1
GO:0000387	spliceosomal snRNP assembly	19	0	0.3	895	1	1
GO:0000393	spliceosomal conformational changes to generate catalytic conformation	5	0	0.08	896	1	1
GO:0000394	RNA splicing, via endonucleolytic cleavage and ligation	9	0	0.14	897	1	1
GO:0000422	autophagy of mitochondrion	27	0	0.43	898	1	1
GO:0000447	endonucleolytic cleavage in ITS1 to separate SSU-rRNA from 5.8S rRNA and LSU-rRNA from tricistronic ...	5	0	0.08	899	1	1
GO:0000459	exonucleolytic trimming involved in rRNA processing	5	0	0.08	900	1	1
GO:0000462	maturation of SSU-rRNA from tricistronic rRNA transcript (SSU-rRNA, 5.8S rRNA, LSU-rRNA)	33	0	0.53	901	1	1
GO:0000463	maturation of LSU-rRNA from tricistronic rRNA transcript (SSU-rRNA, 5.8S rRNA, LSU-rRNA)	9	0	0.14	902	1	1
GO:0000466	maturation of 5.8S rRNA from tricistronic rRNA transcript (SSU-rRNA, 5.8S rRNA, LSU-rRNA)	13	0	0.21	903	1	1
GO:0000467	exonucleolytic trimming to generate mature 3'-end of 5.8S rRNA from tricistronic rRNA transcript (SS...	5	0	0.08	904	1	1
GO:0000469	cleavage involved in rRNA processing	19	0	0.3	905	1	1
GO:0000478	endonucleolytic cleavage involved in rRNA processing	10	0	0.16	906	1	1
GO:0000479	endonucleolytic cleavage of tricistronic rRNA transcript (SSU-rRNA, 5.8S rRNA, LSU-rRNA)	9	0	0.14	907	1	1
GO:0000491	small nucleolar ribonucleoprotein complex assembly	5	0	0.08	908	1	1
GO:0000578	embryonic axis specification	119	0	1.91	909	1	1
GO:0000712	resolution of meiotic recombination intermediates	7	0	0.11	910	1	1
GO:0000724	double-strand break repair via homologous recombination	38	0	0.61	911	1	1
GO:0000725	recombinational repair	38	0	0.61	912	1	1
GO:0000726	non-recombinational repair	10	0	0.16	913	1	1
GO:0000727	double-strand break repair via break-induced replication	5	0	0.08	914	1	1
GO:0000729	DNA double-strand break processing	6	0	0.1	915	1	1
GO:0000731	DNA synthesis involved in DNA repair	10	0	0.16	916	1	1
GO:0000741	karyogamy	5	0	0.08	917	1	1
GO:0000768	syncytium formation by plasma membrane fusion	44	0	0.71	918	1	1
GO:0000819	sister chromatid segregation	109	0	1.75	919	1	1
GO:0000910	cytokinesis	94	0	1.51	920	1	1
GO:0000912	assembly of actomyosin apparatus involved in cytokinesis	20	0	0.32	921	1	1
GO:0000915	actomyosin contractile ring assembly	20	0	0.32	922	1	1
GO:0000916	actomyosin contractile ring contraction	8	0	0.13	923	1	1
GO:0000921	septin ring assembly	5	0	0.08	924	1	1
GO:0000959	mitochondrial RNA metabolic process	21	0	0.34	925	1	1
GO:0000963	mitochondrial RNA processing	7	0	0.11	926	1	1
GO:0000966	RNA 5'-end processing	8	0	0.13	927	1	1
GO:0000972	transcription-dependent tethering of RNA polymerase II gene DNA at nuclear periphery	6	0	0.1	928	1	1
GO:0001101	response to acid chemical	15	0	0.24	929	1	1
GO:0001109	promoter clearance during DNA-templated transcription	7	0	0.11	930	1	1
GO:0001111	promoter clearance from RNA polymerase II promoter	7	0	0.11	931	1	1
GO:0001112	DNA-templated transcriptional open complex formation	7	0	0.11	932	1	1
GO:0001113	transcriptional open complex formation at RNA polymerase II promoter	7	0	0.11	933	1	1
GO:0001120	protein-DNA complex remodeling	7	0	0.11	934	1	1
GO:0001173	DNA-templated transcriptional start site selection	8	0	0.13	935	1	1
GO:0001174	transcriptional start site selection at RNA polymerase II promoter	8	0	0.13	936	1	1
GO:0001178	regulation of transcriptional start site selection at RNA polymerase II promoter	7	0	0.11	937	1	1
GO:0001508	action potential	9	0	0.14	938	1	1
GO:0001510	RNA methylation	41	0	0.66	939	1	1
GO:0001573	ganglioside metabolic process	5	0	0.08	940	1	1
GO:0001578	microtubule bundle formation	26	0	0.42	941	1	1
GO:0001655	urogenital system development	59	0	0.95	942	1	1
GO:0001666	response to hypoxia	46	0	0.74	943	1	1
GO:0001672	regulation of chromatin assembly or disassembly	15	0	0.24	944	1	1
GO:0001676	long-chain fatty acid metabolic process	8	0	0.13	945	1	1
GO:0001678	cellular glucose homeostasis	5	0	0.08	946	1	1
GO:0001682	tRNA 5'-leader removal	7	0	0.11	947	1	1
GO:0001703	gastrulation with mouth forming first	29	0	0.46	948	1	1
GO:0001708	cell fate specification	68	0	1.09	949	1	1
GO:0001731	formation of translation preinitiation complex	8	0	0.13	950	1	1
GO:0001742	oenocyte differentiation	8	0	0.13	951	1	1
GO:0001746	Bolwig's organ morphogenesis	6	0	0.1	952	1	1
GO:0001751	compound eye photoreceptor cell differentiation	140	0	2.24	953	1	1
GO:0001752	compound eye photoreceptor fate commitment	45	0	0.72	954	1	1
GO:0001754	eye photoreceptor cell differentiation	145	0	2.32	955	1	1
GO:0001763	morphogenesis of a branching structure	50	0	0.8	956	1	1
GO:0001764	neuron migration	6	0	0.1	957	1	1
GO:0001775	cell activation	11	0	0.18	958	1	1
GO:0001885	endothelial cell development	9	0	0.14	959	1	1
GO:0001895	retina homeostasis	17	0	0.27	960	1	1
GO:0001934	positive regulation of protein phosphorylation	132	0	2.12	961	1	1
GO:0001941	postsynaptic membrane organization	13	0	0.21	962	1	1
GO:0002027	regulation of heart rate	11	0	0.18	963	1	1
GO:0002028	regulation of sodium ion transport	7	0	0.11	964	1	1
GO:0002052	positive regulation of neuroblast proliferation	9	0	0.14	965	1	1
GO:0002097	tRNA wobble base modification	13	0	0.21	966	1	1
GO:0002098	tRNA wobble uridine modification	12	0	0.19	967	1	1
GO:0002118	aggressive behavior	12	0	0.19	968	1	1
GO:0002121	inter-male aggressive behavior	9	0	0.14	969	1	1
GO:0002168	instar larval development	60	0	0.96	970	1	1
GO:0002182	cytoplasmic translational elongation	6	0	0.1	971	1	1
GO:0002183	cytoplasmic translational initiation	11	0	0.18	972	1	1
GO:0002218	activation of innate immune response	16	0	0.26	973	1	1
GO:0002221	pattern recognition receptor signaling pathway	10	0	0.16	974	1	1
GO:0002224	toll-like receptor signaling pathway	9	0	0.14	975	1	1
GO:0002225	positive regulation of antimicrobial peptide production	25	0	0.4	976	1	1
GO:0002230	positive regulation of defense response to virus by host	10	0	0.16	977	1	1
GO:0002237	response to molecule of bacterial origin	13	0	0.21	978	1	1
GO:0002251	organ or tissue specific immune response	13	0	0.21	979	1	1
GO:0002253	activation of immune response	17	0	0.27	980	1	1
GO:0002385	mucosal immune response	13	0	0.21	981	1	1
GO:0002440	production of molecular mediator of immune response	42	0	0.67	982	1	1
GO:0002684	positive regulation of immune system process	74	0	1.19	983	1	1
GO:0002697	regulation of immune effector process	52	0	0.83	984	1	1
GO:0002698	negative regulation of immune effector process	5	0	0.08	985	1	1
GO:0002699	positive regulation of immune effector process	25	0	0.4	986	1	1
GO:0002700	regulation of production of molecular mediator of immune response	40	0	0.64	987	1	1
GO:0002701	negative regulation of production of molecular mediator of immune response	5	0	0.08	988	1	1
GO:0002702	positive regulation of production of molecular mediator of immune response	25	0	0.4	989	1	1
GO:0002755	MyD88-dependent toll-like receptor signaling pathway	8	0	0.13	990	1	1
GO:0002757	immune response-activating signal transduction	13	0	0.21	991	1	1
GO:0002758	innate immune response-activating signal transduction	13	0	0.21	992	1	1
GO:0002759	regulation of antimicrobial humoral response	44	0	0.71	993	1	1
GO:0002760	positive regulation of antimicrobial humoral response	25	0	0.4	994	1	1
GO:0002764	immune response-regulating signaling pathway	16	0	0.26	995	1	1
GO:0002775	antimicrobial peptide production	41	0	0.66	996	1	1
GO:0002777	antimicrobial peptide biosynthetic process	31	0	0.5	997	1	1
GO:0002778	antibacterial peptide production	18	0	0.29	998	1	1
GO:0002780	antibacterial peptide biosynthetic process	18	0	0.29	999	1	1
GO:0002781	antifungal peptide production	10	0	0.16	1000	1	1
GO:0002783	antifungal peptide biosynthetic process	7	0	0.11	1001	1	1
GO:0002784	regulation of antimicrobial peptide production	39	0	0.63	1002	1	1
GO:0002786	regulation of antibacterial peptide production	18	0	0.29	1003	1	1
GO:0002788	regulation of antifungal peptide production	10	0	0.16	1004	1	1
GO:0002791	regulation of peptide secretion	25	0	0.4	1005	1	1
GO:0002792	negative regulation of peptide secretion	5	0	0.08	1006	1	1
GO:0002793	positive regulation of peptide secretion	13	0	0.21	1007	1	1
GO:0002803	positive regulation of antibacterial peptide production	15	0	0.24	1008	1	1
GO:0002804	positive regulation of antifungal peptide production	10	0	0.16	1009	1	1
GO:0002805	regulation of antimicrobial peptide biosynthetic process	31	0	0.5	1010	1	1
GO:0002807	positive regulation of antimicrobial peptide biosynthetic process	21	0	0.34	1011	1	1
GO:0002808	regulation of antibacterial peptide biosynthetic process	18	0	0.29	1012	1	1
GO:0002810	regulation of antifungal peptide biosynthetic process	7	0	0.11	1013	1	1
GO:0002812	biosynthetic process of antibacterial peptides active against Gram-negative bacteria	13	0	0.21	1014	1	1
GO:0002813	regulation of biosynthetic process of antibacterial peptides active against Gram-negative bacteria	13	0	0.21	1015	1	1
GO:0002831	regulation of response to biotic stimulus	64	0	1.03	1016	1	1
GO:0002832	negative regulation of response to biotic stimulus	14	0	0.22	1017	1	1
GO:0002833	positive regulation of response to biotic stimulus	28	0	0.45	1018	1	1
GO:0002920	regulation of humoral immune response	45	0	0.72	1019	1	1
GO:0002921	negative regulation of humoral immune response	9	0	0.14	1020	1	1
GO:0002922	positive regulation of humoral immune response	25	0	0.4	1021	1	1
GO:0003007	heart morphogenesis	33	0	0.53	1022	1	1
GO:0003013	circulatory system process	38	0	0.61	1023	1	1
GO:0003014	renal system process	22	0	0.35	1024	1	1
GO:0003015	heart process	35	0	0.56	1025	1	1
GO:0003156	regulation of animal organ formation	9	0	0.14	1026	1	1
GO:0003158	endothelium development	9	0	0.14	1027	1	1
GO:0003341	cilium movement	10	0	0.16	1028	1	1
GO:0003381	epithelial cell morphogenesis involved in gastrulation	10	0	0.16	1029	1	1
GO:0003382	epithelial cell morphogenesis	23	0	0.37	1030	1	1
GO:0003383	apical constriction	17	0	0.27	1031	1	1
GO:0003384	apical constriction involved in gastrulation	10	0	0.16	1032	1	1
GO:0003401	axis elongation	7	0	0.11	1033	1	1
GO:0003407	neural retina development	6	0	0.1	1034	1	1
GO:0005975	carbohydrate metabolic process	211	0	3.38	1035	1	1
GO:0005976	polysaccharide metabolic process	35	0	0.56	1036	1	1
GO:0005977	glycogen metabolic process	24	0	0.38	1037	1	1
GO:0005978	glycogen biosynthetic process	6	0	0.1	1038	1	1
GO:0005980	glycogen catabolic process	12	0	0.19	1039	1	1
GO:0005984	disaccharide metabolic process	10	0	0.16	1040	1	1
GO:0005991	trehalose metabolic process	9	0	0.14	1041	1	1
GO:0005996	monosaccharide metabolic process	49	0	0.79	1042	1	1
GO:0006006	glucose metabolic process	29	0	0.46	1043	1	1
GO:0006011	UDP-glucose metabolic process	7	0	0.11	1044	1	1
GO:0006012	galactose metabolic process	6	0	0.1	1045	1	1
GO:0006013	mannose metabolic process	6	0	0.1	1046	1	1
GO:0006020	inositol metabolic process	9	0	0.14	1047	1	1
GO:0006023	aminoglycan biosynthetic process	19	0	0.3	1048	1	1
GO:0006024	glycosaminoglycan biosynthetic process	11	0	0.18	1049	1	1
GO:0006029	proteoglycan metabolic process	18	0	0.29	1050	1	1
GO:0006031	chitin biosynthetic process	5	0	0.08	1051	1	1
GO:0006032	chitin catabolic process	20	0	0.32	1052	1	1
GO:0006034	cuticle chitin metabolic process	5	0	0.08	1053	1	1
GO:0006044	N-acetylglucosamine metabolic process	7	0	0.11	1054	1	1
GO:0006047	UDP-N-acetylglucosamine metabolic process	6	0	0.1	1055	1	1
GO:0006066	alcohol metabolic process	61	0	0.98	1056	1	1
GO:0006071	glycerol metabolic process	8	0	0.13	1057	1	1
GO:0006072	glycerol-3-phosphate metabolic process	9	0	0.14	1058	1	1
GO:0006073	cellular glucan metabolic process	24	0	0.38	1059	1	1
GO:0006081	cellular aldehyde metabolic process	20	0	0.32	1060	1	1
GO:0006084	acetyl-CoA metabolic process	10	0	0.16	1061	1	1
GO:0006090	pyruvate metabolic process	30	0	0.48	1062	1	1
GO:0006091	generation of precursor metabolites and energy	151	0	2.42	1063	1	1
GO:0006094	gluconeogenesis	9	0	0.14	1064	1	1
GO:0006096	glycolytic process	17	0	0.27	1065	1	1
GO:0006098	pentose-phosphate shunt	7	0	0.11	1066	1	1
GO:0006099	tricarboxylic acid cycle	31	0	0.5	1067	1	1
GO:0006101	citrate metabolic process	32	0	0.51	1068	1	1
GO:0006108	malate metabolic process	5	0	0.08	1069	1	1
GO:0006109	regulation of carbohydrate metabolic process	21	0	0.34	1070	1	1
GO:0006112	energy reserve metabolic process	24	0	0.38	1071	1	1
GO:0006119	oxidative phosphorylation	63	0	1.01	1072	1	1
GO:0006120	mitochondrial electron transport, NADH to ubiquinone	29	0	0.46	1073	1	1
GO:0006121	mitochondrial electron transport, succinate to ubiquinone	6	0	0.1	1074	1	1
GO:0006122	mitochondrial electron transport, ubiquinol to cytochrome c	9	0	0.14	1075	1	1
GO:0006123	mitochondrial electron transport, cytochrome c to oxygen	7	0	0.11	1076	1	1
GO:0006140	regulation of nucleotide metabolic process	13	0	0.21	1077	1	1
GO:0006163	purine nucleotide metabolic process	152	0	2.44	1078	1	1
GO:0006164	purine nucleotide biosynthetic process	75	0	1.2	1079	1	1
GO:0006165	nucleoside diphosphate phosphorylation	21	0	0.34	1080	1	1
GO:0006171	cAMP biosynthetic process	9	0	0.14	1081	1	1
GO:0006182	cGMP biosynthetic process	14	0	0.22	1082	1	1
GO:0006206	pyrimidine nucleobase metabolic process	13	0	0.21	1083	1	1
GO:0006207	'de novo' pyrimidine nucleobase biosynthetic process	7	0	0.11	1084	1	1
GO:0006213	pyrimidine nucleoside metabolic process	9	0	0.14	1085	1	1
GO:0006220	pyrimidine nucleotide metabolic process	13	0	0.21	1086	1	1
GO:0006221	pyrimidine nucleotide biosynthetic process	13	0	0.21	1087	1	1
GO:0006260	DNA replication	99	0	1.59	1088	1	1
GO:0006261	DNA-dependent DNA replication	82	0	1.31	1089	1	1
GO:0006264	mitochondrial DNA replication	6	0	0.1	1090	1	1
GO:0006265	DNA topological change	5	0	0.08	1091	1	1
GO:0006270	DNA replication initiation	23	0	0.37	1092	1	1
GO:0006271	DNA strand elongation involved in DNA replication	15	0	0.24	1093	1	1
GO:0006272	leading strand elongation	7	0	0.11	1094	1	1
GO:0006273	lagging strand elongation	7	0	0.11	1095	1	1
GO:0006275	regulation of DNA replication	27	0	0.43	1096	1	1
GO:0006277	DNA amplification	19	0	0.3	1097	1	1
GO:0006281	DNA repair	155	0	2.48	1098	1	1
GO:0006282	regulation of DNA repair	15	0	0.24	1099	1	1
GO:0006284	base-excision repair	11	0	0.18	1100	1	1
GO:0006289	nucleotide-excision repair	24	0	0.38	1101	1	1
GO:0006298	mismatch repair	12	0	0.19	1102	1	1
GO:0006301	postreplication repair	11	0	0.18	1103	1	1
GO:0006302	double-strand break repair	69	0	1.11	1104	1	1
GO:0006303	double-strand break repair via nonhomologous end joining	7	0	0.11	1105	1	1
GO:0006304	DNA modification	8	0	0.13	1106	1	1
GO:0006312	mitotic recombination	9	0	0.14	1107	1	1
GO:0006346	methylation-dependent chromatin silencing	8	0	0.13	1108	1	1
GO:0006348	chromatin silencing at telomere	7	0	0.11	1109	1	1
GO:0006353	DNA-templated transcription, termination	7	0	0.11	1110	1	1
GO:0006354	DNA-templated transcription, elongation	34	0	0.55	1111	1	1
GO:0006356	regulation of transcription by RNA polymerase I	6	0	0.1	1112	1	1
GO:0006360	transcription by RNA polymerase I	13	0	0.21	1113	1	1
GO:0006368	transcription elongation from RNA polymerase II promoter	30	0	0.48	1114	1	1
GO:0006376	mRNA splice site selection	8	0	0.13	1115	1	1
GO:0006378	mRNA polyadenylation	26	0	0.42	1116	1	1
GO:0006379	mRNA cleavage	19	0	0.3	1117	1	1
GO:0006388	tRNA splicing, via endonucleolytic cleavage and ligation	7	0	0.11	1118	1	1
GO:0006390	mitochondrial transcription	9	0	0.14	1119	1	1
GO:0006398	mRNA 3'-end processing by stem-loop binding and cleavage	7	0	0.11	1120	1	1
GO:0006406	mRNA export from nucleus	33	0	0.53	1121	1	1
GO:0006414	translational elongation	28	0	0.45	1122	1	1
GO:0006415	translational termination	7	0	0.11	1123	1	1
GO:0006417	regulation of translation	144	0	2.31	1124	1	1
GO:0006418	tRNA aminoacylation for protein translation	40	0	0.64	1125	1	1
GO:0006446	regulation of translational initiation	17	0	0.27	1126	1	1
GO:0006448	regulation of translational elongation	7	0	0.11	1127	1	1
GO:0006458	'de novo' protein folding	21	0	0.34	1128	1	1
GO:0006465	signal peptide processing	9	0	0.14	1129	1	1
GO:0006470	protein dephosphorylation	84	0	1.35	1130	1	1
GO:0006474	N-terminal protein amino acid acetylation	8	0	0.13	1131	1	1
GO:0006476	protein deacetylation	13	0	0.21	1132	1	1
GO:0006479	protein methylation	69	0	1.11	1133	1	1
GO:0006482	protein demethylation	8	0	0.13	1134	1	1
GO:0006487	protein N-linked glycosylation	32	0	0.51	1135	1	1
GO:0006488	dolichol-linked oligosaccharide biosynthetic process	8	0	0.13	1136	1	1
GO:0006490	oligosaccharide-lipid intermediate biosynthetic process	12	0	0.19	1137	1	1
GO:0006491	N-glycan processing	18	0	0.29	1138	1	1
GO:0006497	protein lipidation	54	0	0.87	1139	1	1
GO:0006501	C-terminal protein lipidation	5	0	0.08	1140	1	1
GO:0006505	GPI anchor metabolic process	28	0	0.45	1141	1	1
GO:0006506	GPI anchor biosynthetic process	27	0	0.43	1142	1	1
GO:0006509	membrane protein ectodomain proteolysis	7	0	0.11	1143	1	1
GO:0006511	ubiquitin-dependent protein catabolic process	203	0	3.25	1144	1	1
GO:0006513	protein monoubiquitination	7	0	0.11	1145	1	1
GO:0006515	protein quality control for misfolded or incompletely synthesized proteins	9	0	0.14	1146	1	1
GO:0006517	protein deglycosylation	13	0	0.21	1147	1	1
GO:0006525	arginine metabolic process	8	0	0.13	1148	1	1
GO:0006534	cysteine metabolic process	9	0	0.14	1149	1	1
GO:0006536	glutamate metabolic process	13	0	0.21	1150	1	1
GO:0006537	glutamate biosynthetic process	5	0	0.08	1151	1	1
GO:0006541	glutamine metabolic process	7	0	0.11	1152	1	1
GO:0006551	leucine metabolic process	5	0	0.08	1153	1	1
GO:0006555	methionine metabolic process	16	0	0.26	1154	1	1
GO:0006560	proline metabolic process	6	0	0.1	1155	1	1
GO:0006563	L-serine metabolic process	5	0	0.08	1156	1	1
GO:0006568	tryptophan metabolic process	5	0	0.08	1157	1	1
GO:0006570	tyrosine metabolic process	6	0	0.1	1158	1	1
GO:0006576	cellular biogenic amine metabolic process	17	0	0.27	1159	1	1
GO:0006586	indolalkylamine metabolic process	5	0	0.08	1160	1	1
GO:0006595	polyamine metabolic process	5	0	0.08	1161	1	1
GO:0006606	protein import into nucleus	57	0	0.91	1162	1	1
GO:0006607	NLS-bearing protein import into nucleus	13	0	0.21	1163	1	1
GO:0006610	ribosomal protein import into nucleus	5	0	0.08	1164	1	1
GO:0006613	cotranslational protein targeting to membrane	11	0	0.18	1165	1	1
GO:0006614	SRP-dependent cotranslational protein targeting to membrane	9	0	0.14	1166	1	1
GO:0006623	protein targeting to vacuole	12	0	0.19	1167	1	1
GO:0006625	protein targeting to peroxisome	7	0	0.11	1168	1	1
GO:0006626	protein targeting to mitochondrion	29	0	0.46	1169	1	1
GO:0006627	protein processing involved in protein targeting to mitochondrion	5	0	0.08	1170	1	1
GO:0006633	fatty acid biosynthetic process	34	0	0.55	1171	1	1
GO:0006635	fatty acid beta-oxidation	32	0	0.51	1172	1	1
GO:0006638	neutral lipid metabolic process	31	0	0.5	1173	1	1
GO:0006639	acylglycerol metabolic process	31	0	0.5	1174	1	1
GO:0006641	triglyceride metabolic process	28	0	0.45	1175	1	1
GO:0006643	membrane lipid metabolic process	89	0	1.43	1176	1	1
GO:0006644	phospholipid metabolic process	122	0	1.96	1177	1	1
GO:0006650	glycerophospholipid metabolic process	81	0	1.3	1178	1	1
GO:0006655	phosphatidylglycerol biosynthetic process	6	0	0.1	1179	1	1
GO:0006661	phosphatidylinositol biosynthetic process	35	0	0.56	1180	1	1
GO:0006662	glycerol ether metabolic process	7	0	0.11	1181	1	1
GO:0006664	glycolipid metabolic process	50	0	0.8	1182	1	1
GO:0006665	sphingolipid metabolic process	54	0	0.87	1183	1	1
GO:0006672	ceramide metabolic process	20	0	0.32	1184	1	1
GO:0006677	glycosylceramide metabolic process	5	0	0.08	1185	1	1
GO:0006684	sphingomyelin metabolic process	5	0	0.08	1186	1	1
GO:0006687	glycosphingolipid metabolic process	17	0	0.27	1187	1	1
GO:0006688	glycosphingolipid biosynthetic process	8	0	0.13	1188	1	1
GO:0006689	ganglioside catabolic process	5	0	0.08	1189	1	1
GO:0006690	icosanoid metabolic process	5	0	0.08	1190	1	1
GO:0006694	steroid biosynthetic process	30	0	0.48	1191	1	1
GO:0006697	ecdysone biosynthetic process	11	0	0.18	1192	1	1
GO:0006723	cuticle hydrocarbon biosynthetic process	5	0	0.08	1193	1	1
GO:0006726	eye pigment biosynthetic process	34	0	0.55	1194	1	1
GO:0006727	ommochrome biosynthetic process	15	0	0.24	1195	1	1
GO:0006730	one-carbon metabolic process	15	0	0.24	1196	1	1
GO:0006733	oxidoreduction coenzyme metabolic process	45	0	0.72	1197	1	1
GO:0006734	NADH metabolic process	5	0	0.08	1198	1	1
GO:0006739	NADP metabolic process	12	0	0.19	1199	1	1
GO:0006743	ubiquinone metabolic process	12	0	0.19	1200	1	1
GO:0006744	ubiquinone biosynthetic process	12	0	0.19	1201	1	1
GO:0006749	glutathione metabolic process	40	0	0.64	1202	1	1
GO:0006751	glutathione catabolic process	5	0	0.08	1203	1	1
GO:0006754	ATP biosynthetic process	38	0	0.61	1204	1	1
GO:0006757	ATP generation from ADP	17	0	0.27	1205	1	1
GO:0006777	Mo-molybdopterin cofactor biosynthetic process	5	0	0.08	1206	1	1
GO:0006778	porphyrin-containing compound metabolic process	13	0	0.21	1207	1	1
GO:0006779	porphyrin-containing compound biosynthetic process	12	0	0.19	1208	1	1
GO:0006783	heme biosynthetic process	12	0	0.19	1209	1	1
GO:0006805	xenobiotic metabolic process	12	0	0.19	1210	1	1
GO:0006813	potassium ion transport	46	0	0.74	1211	1	1
GO:0006814	sodium ion transport	27	0	0.43	1212	1	1
GO:0006816	calcium ion transport	48	0	0.77	1213	1	1
GO:0006817	phosphate ion transport	6	0	0.1	1214	1	1
GO:0006821	chloride transport	33	0	0.53	1215	1	1
GO:0006825	copper ion transport	7	0	0.11	1216	1	1
GO:0006826	iron ion transport	9	0	0.14	1217	1	1
GO:0006829	zinc ion transport	12	0	0.19	1218	1	1
GO:0006835	dicarboxylic acid transport	12	0	0.19	1219	1	1
GO:0006839	mitochondrial transport	77	0	1.23	1220	1	1
GO:0006855	drug transmembrane transport	9	0	0.14	1221	1	1
GO:0006862	nucleotide transport	6	0	0.1	1222	1	1
GO:0006869	lipid transport	58	0	0.93	1223	1	1
GO:0006873	cellular ion homeostasis	106	0	1.7	1224	1	1
GO:0006874	cellular calcium ion homeostasis	38	0	0.61	1225	1	1
GO:0006875	cellular metal ion homeostasis	69	0	1.11	1226	1	1
GO:0006878	cellular copper ion homeostasis	6	0	0.1	1227	1	1
GO:0006879	cellular iron ion homeostasis	9	0	0.14	1228	1	1
GO:0006882	cellular zinc ion homeostasis	9	0	0.14	1229	1	1
GO:0006884	cell volume homeostasis	6	0	0.1	1230	1	1
GO:0006885	regulation of pH	33	0	0.53	1231	1	1
GO:0006887	exocytosis	78	0	1.25	1232	1	1
GO:0006890	retrograde vesicle-mediated transport, Golgi to ER	19	0	0.3	1233	1	1
GO:0006891	intra-Golgi vesicle-mediated transport	25	0	0.4	1234	1	1
GO:0006892	post-Golgi vesicle-mediated transport	27	0	0.43	1235	1	1
GO:0006893	Golgi to plasma membrane transport	14	0	0.22	1236	1	1
GO:0006895	Golgi to endosome transport	5	0	0.08	1237	1	1
GO:0006896	Golgi to vacuole transport	8	0	0.13	1238	1	1
GO:0006897	endocytosis	181	0	2.9	1239	1	1
GO:0006898	receptor-mediated endocytosis	33	0	0.53	1240	1	1
GO:0006900	vesicle budding from membrane	16	0	0.26	1241	1	1
GO:0006901	vesicle coating	5	0	0.08	1242	1	1
GO:0006903	vesicle targeting	9	0	0.14	1243	1	1
GO:0006904	vesicle docking involved in exocytosis	25	0	0.4	1244	1	1
GO:0006906	vesicle fusion	60	0	0.96	1245	1	1
GO:0006909	phagocytosis	50	0	0.8	1246	1	1
GO:0006911	phagocytosis, engulfment	12	0	0.19	1247	1	1
GO:0006919	activation of cysteine-type endopeptidase activity involved in apoptotic process	11	0	0.18	1248	1	1
GO:0006941	striated muscle contraction	8	0	0.13	1249	1	1
GO:0006949	syncytium formation	44	0	0.71	1250	1	1
GO:0006963	positive regulation of antibacterial peptide biosynthetic process	15	0	0.24	1251	1	1
GO:0006964	positive regulation of biosynthetic process of antibacterial peptides active against Gram-negative b...	11	0	0.18	1252	1	1
GO:0006967	positive regulation of antifungal peptide biosynthetic process	7	0	0.11	1253	1	1
GO:0006970	response to osmotic stress	9	0	0.14	1254	1	1
GO:0006984	ER-nucleus signaling pathway	8	0	0.13	1255	1	1
GO:0006986	response to unfolded protein	29	0	0.46	1256	1	1
GO:0006991	response to sterol depletion	6	0	0.1	1257	1	1
GO:0006995	cellular response to nitrogen starvation	5	0	0.08	1258	1	1
GO:0006997	nucleus organization	54	0	0.87	1259	1	1
GO:0006998	nuclear envelope organization	12	0	0.19	1260	1	1
GO:0006999	nuclear pore organization	8	0	0.13	1261	1	1
GO:0007005	mitochondrion organization	160	0	2.56	1262	1	1
GO:0007006	mitochondrial membrane organization	23	0	0.37	1263	1	1
GO:0007007	inner mitochondrial membrane organization	11	0	0.18	1264	1	1
GO:0007009	plasma membrane organization	21	0	0.34	1265	1	1
GO:0007016	cytoskeletal anchoring at plasma membrane	12	0	0.19	1266	1	1
GO:0007018	microtubule-based movement	88	0	1.41	1267	1	1
GO:0007019	microtubule depolymerization	17	0	0.27	1268	1	1
GO:0007026	negative regulation of microtubule depolymerization	10	0	0.16	1269	1	1
GO:0007028	cytoplasm organization	68	0	1.09	1270	1	1
GO:0007029	endoplasmic reticulum organization	23	0	0.37	1271	1	1
GO:0007030	Golgi organization	77	0	1.23	1272	1	1
GO:0007031	peroxisome organization	18	0	0.29	1273	1	1
GO:0007032	endosome organization	12	0	0.19	1274	1	1
GO:0007033	vacuole organization	50	0	0.8	1275	1	1
GO:0007034	vacuolar transport	42	0	0.67	1276	1	1
GO:0007035	vacuolar acidification	12	0	0.19	1277	1	1
GO:0007040	lysosome organization	15	0	0.24	1278	1	1
GO:0007041	lysosomal transport	17	0	0.27	1279	1	1
GO:0007043	cell-cell junction assembly	51	0	0.82	1280	1	1
GO:0007050	cell cycle arrest	7	0	0.11	1281	1	1
GO:0007051	spindle organization	108	0	1.73	1282	1	1
GO:0007052	mitotic spindle organization	68	0	1.09	1283	1	1
GO:0007053	spindle assembly involved in male meiosis	5	0	0.08	1284	1	1
GO:0007056	spindle assembly involved in female meiosis	12	0	0.19	1285	1	1
GO:0007057	spindle assembly involved in female meiosis I	5	0	0.08	1286	1	1
GO:0007059	chromosome segregation	170	0	2.73	1287	1	1
GO:0007060	male meiosis chromosome segregation	7	0	0.11	1288	1	1
GO:0007062	sister chromatid cohesion	23	0	0.37	1289	1	1
GO:0007064	mitotic sister chromatid cohesion	8	0	0.13	1290	1	1
GO:0007076	mitotic chromosome condensation	20	0	0.32	1291	1	1
GO:0007080	mitotic metaphase plate congression	14	0	0.22	1292	1	1
GO:0007088	regulation of mitotic nuclear division	61	0	0.98	1293	1	1
GO:0007091	metaphase/anaphase transition of mitotic cell cycle	30	0	0.48	1294	1	1
GO:0007093	mitotic cell cycle checkpoint	42	0	0.67	1295	1	1
GO:0007094	mitotic spindle assembly checkpoint	14	0	0.22	1296	1	1
GO:0007095	mitotic G2 DNA damage checkpoint	9	0	0.14	1297	1	1
GO:0007096	regulation of exit from mitosis	10	0	0.16	1298	1	1
GO:0007097	nuclear migration	31	0	0.5	1299	1	1
GO:0007098	centrosome cycle	65	0	1.04	1300	1	1
GO:0007099	centriole replication	23	0	0.37	1301	1	1
GO:0007100	mitotic centrosome separation	12	0	0.19	1302	1	1
GO:0007110	meiosis I cytokinesis	11	0	0.18	1303	1	1
GO:0007111	meiosis II cytokinesis	7	0	0.11	1304	1	1
GO:0007112	male meiosis cytokinesis	28	0	0.45	1305	1	1
GO:0007113	endomitotic cell cycle	11	0	0.18	1306	1	1
GO:0007127	meiosis I	50	0	0.8	1307	1	1
GO:0007131	reciprocal meiotic recombination	27	0	0.43	1308	1	1
GO:0007135	meiosis II	9	0	0.14	1309	1	1
GO:0007140	male meiotic nuclear division	57	0	0.91	1310	1	1
GO:0007141	male meiosis I	7	0	0.11	1311	1	1
GO:0007143	female meiotic nuclear division	62	0	0.99	1312	1	1
GO:0007144	female meiosis I	8	0	0.13	1313	1	1
GO:0007157	heterophilic cell-cell adhesion via plasma membrane cell adhesion molecules	15	0	0.24	1314	1	1
GO:0007158	neuron cell-cell adhesion	8	0	0.13	1315	1	1
GO:0007160	cell-matrix adhesion	15	0	0.24	1316	1	1
GO:0007162	negative regulation of cell adhesion	14	0	0.22	1317	1	1
GO:0007178	transmembrane receptor protein serine/threonine kinase signaling pathway	62	0	0.99	1318	1	1
GO:0007179	transforming growth factor beta receptor signaling pathway	17	0	0.27	1319	1	1
GO:0007186	G-protein coupled receptor signaling pathway	136	0	2.18	1320	1	1
GO:0007187	G-protein coupled receptor signaling pathway, coupled to cyclic nucleotide second messenger	33	0	0.53	1321	1	1
GO:0007188	adenylate cyclase-modulating G-protein coupled receptor signaling pathway	31	0	0.5	1322	1	1
GO:0007189	adenylate cyclase-activating G-protein coupled receptor signaling pathway	18	0	0.29	1323	1	1
GO:0007191	adenylate cyclase-activating dopamine receptor signaling pathway	5	0	0.08	1324	1	1
GO:0007193	adenylate cyclase-inhibiting G-protein coupled receptor signaling pathway	12	0	0.19	1325	1	1
GO:0007200	phospholipase C-activating G-protein coupled receptor signaling pathway	11	0	0.18	1326	1	1
GO:0007204	positive regulation of cytosolic calcium ion concentration	13	0	0.21	1327	1	1
GO:0007205	protein kinase C-activating G-protein coupled receptor signaling pathway	5	0	0.08	1328	1	1
GO:0007212	dopamine receptor signaling pathway	8	0	0.13	1329	1	1
GO:0007215	glutamate receptor signaling pathway	8	0	0.13	1330	1	1
GO:0007216	G-protein coupled glutamate receptor signaling pathway	5	0	0.08	1331	1	1
GO:0007218	neuropeptide signaling pathway	31	0	0.5	1332	1	1
GO:0007219	Notch signaling pathway	117	0	1.88	1333	1	1
GO:0007220	Notch receptor processing	12	0	0.19	1334	1	1
GO:0007221	positive regulation of transcription of Notch receptor target	6	0	0.1	1335	1	1
GO:0007224	smoothened signaling pathway	50	0	0.8	1336	1	1
GO:0007249	I-kappaB kinase/NF-kappaB signaling	5	0	0.08	1337	1	1
GO:0007254	JNK cascade	65	0	1.04	1338	1	1
GO:0007259	JAK-STAT cascade	37	0	0.59	1339	1	1
GO:0007266	Rho protein signal transduction	51	0	0.82	1340	1	1
GO:0007269	neurotransmitter secretion	80	0	1.28	1341	1	1
GO:0007272	ensheathment of neurons	12	0	0.19	1342	1	1
GO:0007274	neuromuscular synaptic transmission	67	0	1.07	1343	1	1
GO:0007277	pole cell development	28	0	0.45	1344	1	1
GO:0007279	pole cell formation	20	0	0.32	1345	1	1
GO:0007280	pole cell migration	20	0	0.32	1346	1	1
GO:0007282	cystoblast division	17	0	0.27	1347	1	1
GO:0007283	spermatogenesis	153	0	2.45	1348	1	1
GO:0007286	spermatid development	60	0	0.96	1349	1	1
GO:0007288	sperm axoneme assembly	7	0	0.11	1350	1	1
GO:0007289	spermatid nucleus differentiation	8	0	0.13	1351	1	1
GO:0007291	sperm individualization	34	0	0.55	1352	1	1
GO:0007293	germarium-derived egg chamber formation	89	0	1.43	1353	1	1
GO:0007294	germarium-derived oocyte fate determination	28	0	0.45	1354	1	1
GO:0007295	growth of a germarium-derived egg chamber	11	0	0.18	1355	1	1
GO:0007296	vitellogenesis	8	0	0.13	1356	1	1
GO:0007297	ovarian follicle cell migration	118	0	1.89	1357	1	1
GO:0007298	border follicle cell migration	106	0	1.7	1358	1	1
GO:0007299	ovarian follicle cell-cell adhesion	6	0	0.1	1359	1	1
GO:0007300	ovarian nurse cell to oocyte transport	29	0	0.46	1360	1	1
GO:0007301	female germline ring canal formation	7	0	0.11	1361	1	1
GO:0007303	cytoplasmic transport, nurse cell to oocyte	15	0	0.24	1362	1	1
GO:0007307	eggshell chorion gene amplification	17	0	0.27	1363	1	1
GO:0007308	oocyte construction	121	0	1.94	1364	1	1
GO:0007309	oocyte axis specification	118	0	1.89	1365	1	1
GO:0007310	oocyte dorsal/ventral axis specification	40	0	0.64	1366	1	1
GO:0007311	maternal specification of dorsal/ventral axis, oocyte, germ-line encoded	7	0	0.11	1367	1	1
GO:0007312	oocyte nucleus migration involved in oocyte dorsal/ventral axis specification	7	0	0.11	1368	1	1
GO:0007313	maternal specification of dorsal/ventral axis, oocyte, soma encoded	5	0	0.08	1369	1	1
GO:0007314	oocyte anterior/posterior axis specification	81	0	1.3	1370	1	1
GO:0007315	pole plasm assembly	61	0	0.98	1371	1	1
GO:0007316	pole plasm RNA localization	50	0	0.8	1372	1	1
GO:0007317	regulation of pole plasm oskar mRNA localization	25	0	0.4	1373	1	1
GO:0007318	pole plasm protein localization	12	0	0.19	1374	1	1
GO:0007319	negative regulation of oskar mRNA translation	8	0	0.13	1375	1	1
GO:0007338	single fertilization	27	0	0.43	1376	1	1
GO:0007343	egg activation	8	0	0.13	1377	1	1
GO:0007344	pronuclear fusion	5	0	0.08	1378	1	1
GO:0007346	regulation of mitotic cell cycle	172	0	2.76	1379	1	1
GO:0007348	regulation of syncytial blastoderm mitotic cell cycle	6	0	0.1	1380	1	1
GO:0007349	cellularization	81	0	1.3	1381	1	1
GO:0007350	blastoderm segmentation	169	0	2.71	1382	1	1
GO:0007351	tripartite regional subdivision	114	0	1.83	1383	1	1
GO:0007354	zygotic determination of anterior/posterior axis, embryo	24	0	0.38	1384	1	1
GO:0007362	terminal region determination	20	0	0.32	1385	1	1
GO:0007365	periodic partitioning	36	0	0.58	1386	1	1
GO:0007367	segment polarity determination	30	0	0.48	1387	1	1
GO:0007368	determination of left/right symmetry	8	0	0.13	1388	1	1
GO:0007370	ventral furrow formation	16	0	0.26	1389	1	1
GO:0007377	germ-band extension	6	0	0.1	1390	1	1
GO:0007379	segment specification	22	0	0.35	1391	1	1
GO:0007380	specification of segmental identity, head	7	0	0.11	1392	1	1
GO:0007386	compartment pattern specification	7	0	0.11	1393	1	1
GO:0007392	initiation of dorsal closure	16	0	0.26	1394	1	1
GO:0007394	dorsal closure, elongation of leading edge cells	11	0	0.18	1395	1	1
GO:0007395	dorsal closure, spreading of leading edge cells	8	0	0.13	1396	1	1
GO:0007398	ectoderm development	25	0	0.4	1397	1	1
GO:0007400	neuroblast fate determination	14	0	0.22	1398	1	1
GO:0007402	ganglion mother cell fate determination	7	0	0.11	1399	1	1
GO:0007405	neuroblast proliferation	84	0	1.35	1400	1	1
GO:0007406	negative regulation of neuroblast proliferation	31	0	0.5	1401	1	1
GO:0007412	axon target recognition	11	0	0.18	1402	1	1
GO:0007413	axonal fasciculation	19	0	0.3	1403	1	1
GO:0007414	axonal defasciculation	9	0	0.14	1404	1	1
GO:0007415	defasciculation of motor neuron axon	5	0	0.08	1405	1	1
GO:0007416	synapse assembly	149	0	2.39	1406	1	1
GO:0007417	central nervous system development	204	0	3.27	1407	1	1
GO:0007418	ventral midline development	6	0	0.1	1408	1	1
GO:0007419	ventral cord development	62	0	0.99	1409	1	1
GO:0007420	brain development	94	0	1.51	1410	1	1
GO:0007422	peripheral nervous system development	74	0	1.19	1411	1	1
GO:0007425	epithelial cell fate determination, open tracheal system	6	0	0.1	1412	1	1
GO:0007426	tracheal outgrowth, open tracheal system	21	0	0.34	1413	1	1
GO:0007428	primary branching, open tracheal system	11	0	0.18	1414	1	1
GO:0007430	terminal branching, open tracheal system	19	0	0.3	1415	1	1
GO:0007432	salivary gland boundary specification	20	0	0.32	1416	1	1
GO:0007436	larval salivary gland morphogenesis	10	0	0.16	1417	1	1
GO:0007438	oenocyte development	7	0	0.11	1418	1	1
GO:0007439	ectodermal digestive tract development	8	0	0.13	1419	1	1
GO:0007440	foregut morphogenesis	8	0	0.13	1420	1	1
GO:0007442	hindgut morphogenesis	46	0	0.74	1421	1	1
GO:0007443	Malpighian tubule morphogenesis	37	0	0.59	1422	1	1
GO:0007445	determination of imaginal disc primordium	9	0	0.14	1423	1	1
GO:0007446	imaginal disc growth	38	0	0.61	1424	1	1
GO:0007448	anterior/posterior pattern specification, imaginal disc	16	0	0.26	1425	1	1
GO:0007449	proximal/distal pattern formation, imaginal disc	15	0	0.24	1426	1	1
GO:0007451	dorsal/ventral lineage restriction, imaginal disc	5	0	0.08	1427	1	1
GO:0007455	eye-antennal disc morphogenesis	30	0	0.48	1428	1	1
GO:0007458	progression of morphogenetic furrow involved in compound eye morphogenesis	8	0	0.13	1429	1	1
GO:0007460	R8 cell fate commitment	10	0	0.16	1430	1	1
GO:0007464	R3/R4 cell fate commitment	14	0	0.22	1431	1	1
GO:0007465	R7 cell fate commitment	18	0	0.29	1432	1	1
GO:0007469	antennal development	17	0	0.27	1433	1	1
GO:0007473	wing disc proximal/distal pattern formation	6	0	0.1	1434	1	1
GO:0007474	imaginal disc-derived wing vein specification	40	0	0.64	1435	1	1
GO:0007475	apposition of dorsal and ventral imaginal disc-derived wing surfaces	18	0	0.29	1436	1	1
GO:0007477	notum development	6	0	0.1	1437	1	1
GO:0007478	leg disc morphogenesis	67	0	1.07	1438	1	1
GO:0007479	leg disc proximal/distal pattern formation	11	0	0.18	1439	1	1
GO:0007480	imaginal disc-derived leg morphogenesis	65	0	1.04	1440	1	1
GO:0007482	haltere development	11	0	0.18	1441	1	1
GO:0007483	genital disc morphogenesis	16	0	0.26	1442	1	1
GO:0007484	imaginal disc-derived genitalia development	20	0	0.32	1443	1	1
GO:0007485	imaginal disc-derived male genitalia development	18	0	0.29	1444	1	1
GO:0007486	imaginal disc-derived female genitalia development	5	0	0.08	1445	1	1
GO:0007487	analia development	5	0	0.08	1446	1	1
GO:0007488	histoblast morphogenesis	10	0	0.16	1447	1	1
GO:0007506	gonadal mesoderm development	6	0	0.1	1448	1	1
GO:0007509	mesoderm migration involved in gastrulation	12	0	0.19	1449	1	1
GO:0007519	skeletal muscle tissue development	9	0	0.14	1450	1	1
GO:0007520	myoblast fusion	44	0	0.71	1451	1	1
GO:0007522	visceral muscle development	12	0	0.19	1452	1	1
GO:0007523	larval visceral muscle development	8	0	0.13	1453	1	1
[truncated: 2,407 more rows]

## Sheet: GO_evo_down
GO.ID	Term	Annotated	Significant	Expected	Rank in Fisher.classic	Fisher.classic	Fisher.weight01
[truncated: 3,860 more rows]

[truncated: 8 more sheets: GO_age_spec_up, GO_age_spec_down, GO_evo_spec_up, GO_evo_spec_down, GO_exaggerated_up, GO_exaggerated_down, GO_diminished_up, GO_diminished_down]
