# Supplementary material for: A 24 h Age Difference Causes Twice as Much Gene Expression Divergence as 100 Generations of Adaptation to a Novel Environment
Source: Genes (Basel). 2019 Jan 28;10(2):89. doi: 10.3390/genes10020089 (PMC6410183; doi:10.3390/genes10020089)
Supplement: Supplementary file 1 [file genes-10-00089-s001.zip › genes-429923-SI/TableS3.GO_result_of_mismatched_contrast.xlsx]

## Sheet: legend
sheet name	number of genes	contrasts
		mismatched	evolution
GO_mismatch_up	855	sig. (FC>1.25)	-
GO_mismatch_down	696	sig. (FC<0.8)	-
GO_FP_up	738	sig. (FC>1.25)	n.s.
GO_FP_down	522	sig. (FC<0.8)	n.s.
GO_FN_up	52	n.s.	sig. (FC>1.25)
GO_FN_down	591	n.s.	sig. (FC<0.8)
GO_consistent_up	104	sig. (FC>1.25)	sig. (FC>1.25)
GO_consistent_down	174	sig. (FC<0.8)	sig. (FC<0.8)
GO_reversed	13	sig. (FC>1.25)	sig. (FC<0.8)

## Sheet: GO_mismatch_up
GO.ID	Term	Annotated	Significant	Expected	Rank in Fisher.classic	Fisher.classic	Fisher.weight01
GO:0002181	cytoplasmic translation	103	31	9.62	2	1.8e-09	3.9e-10
GO:0006508	proteolysis	573	73	53.54	115	0.00315	1.6e-09
GO:0007305	vitelline membrane formation involved in chorion-containing eggshell formation	11	9	1.03	4	2.4e-08	2.4e-08
GO:0008406	gonad development	44	17	4.11	9	1.6e-07	1.1e-05
GO:0007494	midgut development	27	11	2.52	22	1.4e-05	1.4e-05
GO:0044331	cell-cell adhesion mediated by cadherin	12	7	1.12	25	3.1e-05	3.1e-05
GO:0016339	calcium-dependent cell-cell adhesion via plasma membrane cell adhesion molecules	16	8	1.49	28	3.6e-05	3.6e-05
GO:0042761	very long-chain fatty acid biosynthetic process	16	8	1.49	29	3.6e-05	3.6e-05
GO:0072175	epithelial tube formation	6	5	0.56	30	3.9e-05	3.9e-05
GO:0007503	fat body development	7	5	0.65	37	0.00013	0.00013
GO:0055065	metal ion homeostasis	92	12	8.6	554	0.14774	0.00035
GO:0016318	ommatidial rotation	22	8	2.06	60	0.00054	0.00054
GO:0070983	dendrite guidance	22	8	2.06	61	0.00054	0.00054
GO:0019367	fatty acid elongation, saturated fatty acid	13	6	1.21	65	0.00063	0.00063
GO:0034625	fatty acid elongation, monounsaturated fatty acid	13	6	1.21	66	0.00063	0.00063
GO:0034626	fatty acid elongation, polyunsaturated fatty acid	13	6	1.21	67	0.00063	0.00063
GO:0007156	homophilic cell adhesion via plasma membrane adhesion molecules	29	9	2.71	78	0.00093	0.00093
GO:0007473	wing disc proximal/distal pattern formation	6	4	0.56	79	0.00097	0.00097
GO:0000028	ribosomal small subunit assembly	14	6	1.31	80	0.00101	0.00101
GO:0007155	cell adhesion	158	35	14.76	11	8.6e-07	0.00105
GO:0006952	defense response	298	28	27.84	1276	0.5178	0.00122
GO:0030148	sphingolipid biosynthetic process	33	9	3.08	113	0.00254	0.00142
GO:0007398	ectoderm development	25	8	2.34	87	0.00143	0.00157
GO:0003401	axis elongation	7	4	0.65	101	0.0021	0.0021
GO:0007386	compartment pattern specification	7	4	0.65	102	0.0021	0.0021
GO:0034475	U4 snRNA 3'-end processing	7	4	0.65	103	0.0021	0.0021
GO:0007426	tracheal outgrowth, open tracheal system	21	7	1.96	107	0.00218	0.00218
GO:0035050	embryonic heart tube development	21	7	1.96	108	0.00218	0.00218
GO:0007435	salivary gland morphogenesis	81	12	7.57	396	0.07207	0.00308
GO:0008585	female gonad development	12	5	1.12	116	0.00318	0.00318
GO:0007440	foregut morphogenesis	8	4	0.75	121	0.00389	0.00389
GO:0007458	progression of morphogenetic furrow involved in compound eye morphogenesis	8	4	0.75	122	0.00389	0.00389
GO:0034427	nuclear-transcribed mRNA catabolic process, exonucleolytic, 3'-5'	8	4	0.75	123	0.00389	0.00389
GO:0050918	positive chemotaxis	8	4	0.75	124	0.00389	0.00389
GO:0060026	convergent extension	8	4	0.75	125	0.00389	0.00389
GO:0007419	ventral cord development	62	13	5.79	130	0.00413	0.00413
GO:0035277	spiracle morphogenesis, open tracheal system	18	6	1.68	136	0.00453	0.00453
GO:0007443	Malpighian tubule morphogenesis	37	10	3.46	93	0.0016	0.00502
GO:0007455	eye-antennal disc morphogenesis	30	8	2.8	142	0.00508	0.00508
GO:0002052	positive regulation of neuroblast proliferation	9	4	0.84	154	0.00649	0.00649
GO:0048100	wing disc anterior/posterior pattern formation	9	4	0.84	155	0.00649	0.00649
GO:0071028	nuclear mRNA surveillance	9	4	0.84	156	0.00649	0.00649
GO:0007400	neuroblast fate determination	14	5	1.31	159	0.00687	0.00687
GO:0014019	neuroblast development	14	5	1.31	160	0.00687	0.00687
GO:0030713	ovarian follicle cell stalk formation	14	5	1.31	161	0.00687	0.00687
GO:0031125	rRNA 3'-end processing	10	5	0.93	83	0.00119	0.00699
GO:0007313	maternal specification of dorsal/ventral axis, oocyte, soma encoded	5	3	0.47	163	0.00703	0.00703
GO:0032469	endoplasmic reticulum calcium ion homeostasis	5	3	0.47	164	0.00703	0.00703
GO:0045463	R8 cell development	5	3	0.47	165	0.00703	0.00703
GO:0046663	dorsal closure, leading edge cell differentiation	5	3	0.47	166	0.00703	0.00703
GO:0060395	SMAD protein signal transduction	5	3	0.47	167	0.00703	0.00703
GO:0071051	polyadenylation-dependent snoRNA 3'-end processing	5	3	0.47	168	0.00703	0.00703
GO:0006032	chitin catabolic process	20	6	1.87	173	0.00805	0.00805
GO:1901072	glucosamine-containing compound catabolic process	22	8	2.06	62	0.00054	0.00861
GO:0040036	regulation of fibroblast growth factor receptor signaling pathway	7	4	0.65	104	0.0021	0.00868
GO:0006403	RNA localization	166	11	15.51	2220	0.91746	0.00888
GO:0007304	chorion-containing eggshell formation	105	29	9.81	7	5.3e-08	0.00933
GO:0021782	glial cell development	30	6	2.8	339	0.05558	0.00954
GO:0007474	imaginal disc-derived wing vein specification	40	9	3.74	185	0.01	0.01
GO:0016075	rRNA catabolic process	10	4	0.93	187	0.01003	0.01003
GO:0022409	positive regulation of cell-cell adhesion	10	4	0.93	188	0.01003	0.01003
GO:0031290	retinal ganglion cell axon guidance	10	4	0.93	189	0.01003	0.01003
GO:0072499	photoreceptor cell axon guidance	27	7	2.52	193	0.01015	0.01015
GO:0008258	head involution	34	8	3.18	200	0.0113	0.0113
GO:0055114	oxidation-reduction process	433	45	40.46	710	0.24234	0.01218
GO:0042273	ribosomal large subunit biogenesis	58	14	5.42	70	0.0007	0.01241
GO:0085029	extracellular matrix assembly	17	12	1.59	1	1.6e-09	0.01267
GO:0018990	ecdysis, chitin-based cuticle	16	5	1.49	213	0.0128	0.0128
GO:0007224	smoothened signaling pathway	50	6	4.67	817	0.3234	0.01297
GO:0016477	cell migration	266	36	24.85	234	0.01426	0.01302
GO:0001746	Bolwig's organ morphogenesis	6	3	0.56	218	0.01309	0.01309
GO:0010862	positive regulation of pathway-restricted SMAD protein phosphorylation	6	3	0.56	219	0.01309	0.01309
GO:0010888	negative regulation of lipid storage	6	3	0.56	220	0.01309	0.01309
GO:0034446	substrate adhesion-dependent cell spreading	6	3	0.56	221	0.01309	0.01309
GO:0035156	fusion cell fate specification	6	3	0.56	222	0.01309	0.01309
GO:0035224	genital disc anterior/posterior pattern formation	6	3	0.56	223	0.01309	0.01309
GO:0048562	embryonic organ morphogenesis	6	3	0.56	224	0.01309	0.01309
GO:0040003	chitin-based cuticle development	82	13	7.66	303	0.03966	0.01375
GO:0006697	ecdysone biosynthetic process	11	4	1.03	235	0.01461	0.01461
GO:2000274	regulation of epithelial cell migration, open tracheal system	11	4	1.03	236	0.01461	0.01461
GO:0003007	heart morphogenesis	33	8	3.08	178	0.00939	0.01662
GO:0007605	sensory perception of sound	44	9	4.11	246	0.01854	0.01854
GO:0046843	dorsal appendage formation	44	9	4.11	247	0.01854	0.01854
GO:0007548	sex differentiation	80	24	7.47	8	1.4e-07	0.01897
GO:0046716	muscle cell cellular homeostasis	24	6	2.24	251	0.02027	0.02027
GO:0010038	response to metal ion	33	6	3.08	418	0.08197	0.02032
GO:0016348	imaginal disc-derived leg joint morphogenesis	12	4	1.12	254	0.02033	0.02033
GO:0048066	developmental pigmentation	93	18	8.69	106	0.0021	0.02075
GO:0035152	regulation of tube architecture, open tracheal system	76	15	7.1	127	0.00395	0.02087
GO:0048859	formation of anatomical boundary	42	10	3.92	134	0.00442	0.02102
GO:0048103	somatic stem cell division	46	7	4.3	520	0.13314	0.02131
GO:0006044	N-acetylglucosamine metabolic process	7	3	0.65	259	0.02134	0.02134
GO:0008584	male gonad development	7	3	0.65	260	0.02134	0.02134
GO:0060571	morphogenesis of an epithelial fold	7	3	0.65	261	0.02134	0.02134
GO:0048085	adult chitin-containing cuticle pigmentation	28	6	2.62	309	0.04129	0.02148
GO:0007420	brain development	94	13	8.78	443	0.09693	0.02167
GO:0035161	imaginal disc lineage restriction	8	3	0.75	285	0.03181	0.02449
GO:0048665	neuron fate specification	12	3	1.12	429	0.09449	0.02452
GO:0008015	blood circulation	28	4	2.62	734	0.26292	0.02456
GO:0045216	cell-cell junction organization	75	6	7.01	1734	0.71417	0.02472
GO:0051960	regulation of nervous system development	262	23	24.48	1580	0.65744	0.02476
GO:0007417	central nervous system development	204	31	19.06	133	0.00435	0.02605
GO:0007413	axonal fasciculation	19	5	1.78	269	0.02698	0.02698
GO:0002385	mucosal immune response	13	4	1.21	271	0.02724	0.02724
GO:0010025	wax biosynthetic process	13	4	1.21	272	0.02724	0.02724
GO:0009617	response to bacterium	170	18	15.88	815	0.32324	0.02732
GO:0007369	gastrulation	64	9	5.98	552	0.13938	0.03171
GO:0006525	arginine metabolic process	8	3	0.75	286	0.03181	0.03181
GO:0008343	adult feeding behavior	8	3	0.75	287	0.03181	0.03181
GO:0090276	regulation of peptide hormone secretion	8	3	0.75	288	0.03181	0.03181
GO:0000027	ribosomal large subunit assembly	20	5	1.87	293	0.03328	0.03328
GO:0007362	terminal region determination	20	5	1.87	294	0.03328	0.03328
GO:0035336	long-chain fatty-acyl-CoA metabolic process	14	4	1.31	300	0.03539	0.03539
GO:0005975	carbohydrate metabolic process	211	27	19.72	342	0.05634	0.03604
GO:0007411	axon guidance	211	34	19.72	81	0.00105	0.04296
GO:0009952	anterior/posterior pattern specification	148	24	13.83	141	0.00505	0.04311
GO:0008595	anterior/posterior axis specification, embryo	114	17	10.65	297	0.03511	0.04376
GO:0001894	tissue homeostasis	44	10	4.11	150	0.00628	0.04384
GO:0019731	antibacterial humoral response	27	5	2.52	447	0.10145	0.04441
GO:0006465	signal peptide processing	9	3	0.84	312	0.04446	0.04446
GO:0035225	determination of genital disc primordium	9	3	0.84	313	0.04446	0.04446
GO:0071322	cellular response to carbohydrate stimulus	9	3	0.84	314	0.04446	0.04446
GO:0007160	cell-matrix adhesion	15	4	1.4	318	0.04479	0.04479
GO:0071711	basement membrane organization	15	4	1.4	319	0.04479	0.04479
GO:0006629	lipid metabolic process	386	43	36.07	512	0.12507	0.04489
GO:0043408	regulation of MAPK cascade	132	11	12.33	1714	0.70024	0.04506
GO:0035215	genital disc development	38	11	3.55	56	0.0005	0.0453
GO:0014017	neuroblast fate commitment	18	7	1.68	73	0.00076	0.04557
GO:0007427	epithelial cell migration, open tracheal system	33	9	3.08	114	0.00254	0.04769
GO:0035220	wing disc development	306	34	28.59	580	0.16194	0.0479
GO:0006633	fatty acid biosynthetic process	34	12	3.18	26	3.2e-05	0.05388
GO:0035147	branch fusion, open tracheal system	16	4	1.49	334	0.05545	0.05545
GO:0006820	anion transport	170	18	15.88	816	0.32324	0.05555
GO:0007367	segment polarity determination	30	6	2.8	340	0.05558	0.05558
GO:0007431	salivary gland development	109	18	10.18	203	0.01174	0.05797
GO:0045995	regulation of embryonic development	74	9	6.91	718	0.25189	0.05922
GO:0030381	chorion-containing eggshell pattern formation	10	3	0.93	345	0.05922	0.05922
GO:0035160	maintenance of epithelial integrity, open tracheal system	10	3	0.93	346	0.05922	0.05922
GO:0060326	cell chemotaxis	10	3	0.93	347	0.05922	0.05922
GO:0070593	dendrite self-avoidance	10	3	0.93	348	0.05922	0.05922
GO:0003015	heart process	35	5	3.27	680	0.22484	0.0593
GO:0006030	chitin metabolic process	56	13	5.23	92	0.00158	0.062
GO:0007391	dorsal closure	95	16	8.88	233	0.01416	0.06235
GO:0042051	compound eye photoreceptor development	81	11	7.57	519	0.13184	0.06705
GO:0008293	torso signaling pathway	24	5	2.24	359	0.06709	0.06709
GO:0002065	columnar/cuboidal epithelial cell differentiation	288	50	26.91	20	9.8e-06	0.06781
GO:0042335	cuticle development	136	25	12.71	71	0.00071	0.06997
GO:0007460	R8 cell fate commitment	10	3	0.93	349	0.05922	0.07194
GO:0042676	compound eye cone cell fate commitment	10	3	0.93	350	0.05922	0.07194
GO:0000467	exonucleolytic trimming to generate mature 3'-end of 5.8S rRNA from tricistronic rRNA transcript (SS...	5	2	0.47	374	0.07205	0.07205
GO:0006265	DNA topological change	5	2	0.47	375	0.07205	0.07205
GO:0006551	leucine metabolic process	5	2	0.47	376	0.07205	0.07205
GO:0007561	imaginal disc eversion	5	2	0.47	377	0.07205	0.07205
GO:0034227	tRNA thio-modification	5	2	0.47	378	0.07205	0.07205
GO:0034453	microtubule anchoring	5	2	0.47	379	0.07205	0.07205
GO:0035001	dorsal trunk growth, open tracheal system	5	2	0.47	380	0.07205	0.07205
GO:0035310	notum cell fate specification	5	2	0.47	381	0.07205	0.07205
GO:0042685	cardioblast cell fate specification	5	2	0.47	382	0.07205	0.07205
GO:0042688	crystal cell differentiation	5	2	0.47	383	0.07205	0.07205
GO:0045743	positive regulation of fibroblast growth factor receptor signaling pathway	5	2	0.47	384	0.07205	0.07205
GO:0048052	R1/R6 cell differentiation	5	2	0.47	385	0.07205	0.07205
GO:0050886	endocrine process	5	2	0.47	386	0.07205	0.07205
GO:0051890	regulation of cardioblast differentiation	5	2	0.47	387	0.07205	0.07205
GO:0060914	heart formation	5	2	0.47	388	0.07205	0.07205
GO:0071046	nuclear polyadenylation-dependent ncRNA catabolic process	5	2	0.47	389	0.07205	0.07205
GO:0071260	cellular response to mechanical stimulus	5	2	0.47	390	0.07205	0.07205
GO:0090646	mitochondrial tRNA processing	5	2	0.47	391	0.07205	0.07205
GO:0097327	response to antineoplastic agent	5	2	0.47	392	0.07205	0.07205
GO:0008045	motor neuron axon guidance	56	9	5.23	400	0.07345	0.07345
GO:0051129	negative regulation of cellular component organization	136	7	12.71	2446	0.97573	0.07346
GO:0009880	embryonic pattern specification	185	27	17.29	212	0.01263	0.07382
GO:0030301	cholesterol transport	17	4	1.59	363	0.06735	0.07583
GO:0035017	cuticle pattern formation	29	5	2.71	516	0.12837	0.07587
GO:0007479	leg disc proximal/distal pattern formation	11	3	1.03	403	0.07595	0.07595
GO:0007482	haltere development	11	3	1.03	404	0.07595	0.07595
GO:0030488	tRNA methylation	18	4	1.68	411	0.08046	0.08046
GO:0007422	peripheral nervous system development	74	11	6.91	416	0.08114	0.08438
GO:0008039	synaptic target recognition	36	7	3.36	324	0.04597	0.0887
GO:0035295	tube development	568	78	53.07	43	0.00024	0.08987
GO:0060562	epithelial tube morphogenesis	368	48	34.38	195	0.01019	0.0916
GO:0009791	post-embryonic development	502	58	46.91	330	0.04913	0.09194
GO:0008038	neuron recognition	85	19	7.94	44	0.00025	0.09203
GO:0009798	axis specification	176	22	16.44	441	0.096	0.09278
GO:0016074	snoRNA metabolic process	9	5	0.84	69	0.00064	0.09299
GO:0008645	hexose transmembrane transport	17	4	1.59	364	0.06735	0.09323
GO:0051156	glucose 6-phosphate metabolic process	8	3	0.75	289	0.03181	0.09325
GO:0061061	muscle structure development	186	19	17.38	867	0.37601	0.09334
GO:0048056	R3/R4 cell differentiation	15	3	1.4	567	0.15917	0.09334
GO:0007492	endoderm development	6	2	0.56	448	0.10152	0.09336
GO:0007586	digestion	6	2	0.56	449	0.10152	0.09336
GO:0021953	central nervous system neuron differentiation	6	2	0.56	450	0.10152	0.09336
GO:0046500	S-adenosylmethionine metabolic process	8	2	0.75	582	0.16752	0.09339
GO:0045168	cell-cell signaling involved in cell fate commitment	32	4	2.99	844	0.35018	0.09342
GO:0048139	female germ-line cyst encapsulation	11	2	1.03	738	0.27468	0.09343
GO:0035168	larval lymph gland hemocyte differentiation	13	2	1.21	831	0.34636	0.09345
GO:0010721	negative regulation of cell development	67	7	6.26	1019	0.43753	0.09346
GO:0046154	rhodopsin metabolic process	16	2	1.49	1092	0.44876	0.09349
GO:0045859	regulation of protein kinase activity	84	7	7.85	1651	0.68069	0.09368
GO:1905037	autophagosome organization	34	2	3.18	2032	0.84027	0.09372
GO:0120035	regulation of plasma membrane bounded cell projection organization	109	9	10.18	1717	0.70103	0.09373
GO:0051168	nuclear export	68	4	6.35	2140	0.89072	0.09389
GO:0007432	salivary gland boundary specification	20	4	1.87	486	0.11008	0.09441
GO:0002098	tRNA wobble uridine modification	12	3	1.12	430	0.09449	0.09449
GO:0007509	mesoderm migration involved in gastrulation	12	3	1.12	431	0.09449	0.09449
GO:0035567	non-canonical Wnt signaling pathway	12	3	1.12	432	0.09449	0.09449
GO:0009141	nucleoside triphosphate metabolic process	115	4	10.75	2597	0.99577	0.0945
GO:0045167	asymmetric protein localization involved in cell fate determination	19	4	1.78	437	0.09472	0.09472
GO:0045467	R7 cell development	19	4	1.78	438	0.09472	0.09472
GO:0007169	transmembrane receptor protein tyrosine kinase signaling pathway	155	23	14.48	242	0.01693	0.09847
GO:0007306	eggshell chorion assembly	71	14	6.63	144	0.00533	0.09907
GO:0070887	cellular response to chemical stimulus	314	36	29.34	497	0.11293	0.10011
GO:0030155	regulation of cell adhesion	40	9	3.74	186	0.01	0.10053
GO:0042659	regulation of cell fate specification	25	7	2.34	153	0.00648	0.10068
GO:0007365	periodic partitioning	36	8	3.36	239	0.01596	0.10069
GO:0042675	compound eye cone cell differentiation	16	5	1.49	214	0.0128	0.10098
GO:0042693	muscle cell fate commitment	11	3	1.03	405	0.07595	0.10138
GO:0045047	protein targeting to ER	15	3	1.4	568	0.15917	0.10148
GO:0001764	neuron migration	6	2	0.56	451	0.10152	0.10152
GO:0003407	neural retina development	6	2	0.56	452	0.10152	0.10152
GO:0006047	UDP-N-acetylglucosamine metabolic process	6	2	0.56	453	0.10152	0.10152
GO:0006560	proline metabolic process	6	2	0.56	454	0.10152	0.10152
GO:0007418	ventral midline development	6	2	0.56	455	0.10152	0.10152
GO:0007425	epithelial cell fate determination, open tracheal system	6	2	0.56	456	0.10152	0.10152
GO:0009083	branched-chain amino acid catabolic process	6	2	0.56	457	0.10152	0.10152
GO:0016078	tRNA catabolic process	6	2	0.56	458	0.10152	0.10152
GO:0019321	pentose metabolic process	6	2	0.56	459	0.10152	0.10152
GO:0032528	microvillus organization	6	2	0.56	460	0.10152	0.10152
GO:0032875	regulation of DNA endoreduplication	6	2	0.56	461	0.10152	0.10152
GO:0035094	response to nicotine	6	2	0.56	462	0.10152	0.10152
GO:0035155	negative regulation of terminal cell fate specification, open tracheal system	6	2	0.56	463	0.10152	0.10152
GO:0035207	negative regulation of hemocyte proliferation	6	2	0.56	464	0.10152	0.10152
GO:0043392	negative regulation of DNA binding	6	2	0.56	465	0.10152	0.10152
GO:0043470	regulation of carbohydrate catabolic process	6	2	0.56	466	0.10152	0.10152
GO:0043928	exonucleolytic nuclear-transcribed mRNA catabolic process involved in deadenylation-dependent decay	6	2	0.56	467	0.10152	0.10152
GO:0046665	amnioserosa maintenance	6	2	0.56	468	0.10152	0.10152
GO:0046688	response to copper ion	6	2	0.56	469	0.10152	0.10152
GO:0048036	central complex development	6	2	0.56	470	0.10152	0.10152
GO:0048636	positive regulation of muscle organ development	6	2	0.56	471	0.10152	0.10152
GO:1900087	positive regulation of G1/S transition of mitotic cell cycle	6	2	0.56	472	0.10152	0.10152
GO:0007280	pole cell migration	20	4	1.87	487	0.11008	0.11008
GO:0007390	germ-band shortening	20	4	1.87	488	0.11008	0.11008
GO:0043171	peptide catabolic process	20	4	1.87	489	0.11008	0.11008
GO:0030198	extracellular matrix organization	45	16	4.2	13	1.4e-06	0.11083
GO:0007314	oocyte anterior/posterior axis specification	81	8	7.57	1158	0.48982	0.11085
GO:0016331	morphogenesis of embryonic epithelium	108	19	10.09	140	0.00492	0.11191
GO:0030707	ovarian follicle cell development	282	48	26.35	23	2.5e-05	0.11243
GO:0006644	phospholipid metabolic process	122	7	11.4	2304	0.94645	0.11308
GO:0007165	signal transduction	1242	102	116.05	2283	0.94201	0.11368
GO:0006517	protein deglycosylation	13	3	1.21	501	0.11467	0.11467
GO:0009084	glutamine family amino acid biosynthetic process	13	3	1.21	502	0.11467	0.11467
GO:0036098	male germ-line stem cell population maintenance	13	3	1.21	503	0.11467	0.11467
GO:0045926	negative regulation of growth	93	8	8.69	1574	0.65029	0.11563
GO:0000122	negative regulation of transcription by RNA polymerase II	134	17	12.52	510	0.11898	0.11898
GO:0016311	dephosphorylation	135	12	12.61	1480	0.61671	0.1301
GO:0035309	wing and notum subfield formation	12	4	1.12	255	0.02033	0.13309
GO:0043467	regulation of generation of precursor metabolites and energy	12	3	1.12	433	0.09449	0.13342
GO:0060438	trachea development	12	3	1.12	434	0.09449	0.13342
GO:0031167	rRNA methylation	14	3	1.31	543	0.1363	0.13348
GO:0061355	Wnt protein secretion	14	3	1.31	544	0.1363	0.13348
GO:0006098	pentose-phosphate shunt	7	2	0.65	523	0.13359	0.13359
GO:0006207	'de novo' pyrimidine nucleobase biosynthetic process	7	2	0.65	524	0.13359	0.13359
GO:0007402	ganglion mother cell fate determination	7	2	0.65	525	0.13359	0.13359
GO:0007516	hemocyte development	7	2	0.65	526	0.13359	0.13359
GO:0016486	peptide hormone processing	7	2	0.65	527	0.13359	0.13359
GO:0030856	regulation of epithelial cell differentiation	7	2	0.65	528	0.13359	0.13359
GO:0031118	rRNA pseudouridine synthesis	7	2	0.65	529	0.13359	0.13359
GO:0035289	posterior head segmentation	7	2	0.65	530	0.13359	0.13359
GO:0046672	positive regulation of compound eye retinal cell programmed cell death	7	2	0.65	531	0.13359	0.13359
GO:0048042	regulation of post-mating oviposition	7	2	0.65	532	0.13359	0.13359
GO:0051180	vitamin transport	7	2	0.65	533	0.13359	0.13359
GO:0060250	germ-line stem-cell niche homeostasis	7	2	0.65	534	0.13359	0.13359
GO:0061331	epithelial cell proliferation involved in Malpighian tubule morphogenesis	7	2	0.65	535	0.13359	0.13359
GO:1903578	regulation of ATP metabolic process	7	2	0.65	536	0.13359	0.13359
GO:0022411	cellular component disassembly	109	6	10.18	2328	0.94918	0.13544
GO:0016360	sensory organ precursor cell fate determination	14	3	1.31	545	0.1363	0.1363
GO:0045494	photoreceptor cell maintenance	14	3	1.31	546	0.1363	0.1363
GO:0042981	regulation of apoptotic process	180	18	16.82	1005	0.41722	0.13963
GO:0001709	cell fate determination	120	18	11.21	281	0.02919	0.13995
GO:0007498	mesoderm development	75	13	7.01	258	0.02049	0.14196
GO:0001708	cell fate specification	68	18	6.35	27	3.4e-05	0.1541
GO:0007552	metamorphosis	374	42	34.95	509	0.1175	0.15628
GO:0006727	ommochrome biosynthetic process	15	3	1.4	569	0.15917	0.15917
GO:0007157	heterophilic cell-cell adhesion via plasma membrane cell adhesion molecules	15	3	1.4	570	0.15917	0.15917
GO:0035167	larval lymph gland hemopoiesis	36	6	3.36	499	0.1142	0.16153
GO:1902476	chloride transmembrane transport	23	4	2.15	581	0.16201	0.16201
GO:0016042	lipid catabolic process	96	8	8.97	1660	0.68555	0.16376
GO:0006376	mRNA splice site selection	8	2	0.75	583	0.16752	0.16752
GO:0007395	dorsal closure, spreading of leading edge cells	8	2	0.75	584	0.16752	0.16752
GO:0007523	larval visceral muscle development	8	2	0.75	585	0.16752	0.16752
GO:0007638	mechanosensory behavior	8	2	0.75	586	0.16752	0.16752
GO:0016330	second mitotic wave involved in compound eye morphogenesis	8	2	0.75	587	0.16752	0.16752
GO:0018279	protein N-linked glycosylation via asparagine	8	2	0.75	588	0.16752	0.16752
GO:0042438	melanin biosynthetic process	8	2	0.75	589	0.16752	0.16752
GO:0046855	inositol phosphate dephosphorylation	8	2	0.75	590	0.16752	0.16752
GO:0061327	anterior Malpighian tubule development	8	2	0.75	591	0.16752	0.16752
GO:0097150	neuronal stem cell population maintenance	8	2	0.75	592	0.16752	0.16752
GO:1900371	regulation of purine nucleotide biosynthetic process	8	2	0.75	593	0.16752	0.16752
GO:0048729	tissue morphogenesis	494	68	46.16	64	0.00058	0.17255
GO:0030703	eggshell formation	107	30	10	3	2.1e-08	0.17331
GO:0035239	tube morphogenesis	396	53	37	132	0.00423	0.17416
GO:0048736	appendage development	271	34	25.32	323	0.04517	0.17613
GO:0048737	imaginal disc-derived appendage development	267	33	24.95	343	0.05696	0.17629
GO:0045944	positive regulation of transcription by RNA polymerase II	230	26	21.49	610	0.17665	0.17665
GO:0035218	leg disc development	79	14	7.38	231	0.01375	0.1767
GO:0031126	snoRNA 3'-end processing	7	4	0.65	105	0.0021	0.17753
GO:0002376	immune system process	373	38	34.85	781	0.30837	0.17755
GO:0015918	sterol transport	20	5	1.87	295	0.03328	0.17758
GO:0048332	mesoderm morphogenesis	21	5	1.96	306	0.04044	0.1776
GO:0007478	leg disc morphogenesis	67	9	6.26	605	0.17002	0.17767
GO:0050920	regulation of chemotaxis	20	4	1.87	490	0.11008	0.17783
GO:1901292	nucleoside phosphate catabolic process	32	5	2.99	607	0.17401	0.17786
GO:0002793	positive regulation of peptide secretion	13	3	1.21	504	0.11467	0.17791
GO:0031038	myosin II filament organization	8	2	0.75	594	0.16752	0.17805
GO:0000096	sulfur amino acid metabolic process	19	3	1.78	727	0.2594	0.17805
GO:0043279	response to alkaloid	19	3	1.78	728	0.2594	0.17805
GO:0045665	negative regulation of neuron differentiation	19	3	1.78	729	0.2594	0.17805
GO:0070252	actin-mediated cell contraction	19	3	1.78	730	0.2594	0.17805
GO:0023061	signal release	105	11	9.81	966	0.39176	0.17806
GO:0045611	negative regulation of hemocyte differentiation	10	2	0.93	686	0.23855	0.17809
GO:0048592	eye morphogenesis	257	25	24.01	1088	0.44695	0.17811
GO:0022408	negative regulation of cell-cell adhesion	11	2	1.03	739	0.27468	0.17812
GO:0071229	cellular response to acid chemical	12	2	1.12	782	0.31072	0.17814
GO:0030537	larval behavior	35	4	3.27	1002	0.41604	0.17818
GO:1990138	neuron projection extension	48	5	4.48	1127	0.46979	0.17823
GO:0031669	cellular response to nutrient levels	61	6	5.7	1244	0.51118	0.17828
GO:0051707	response to other organism	269	25	25.13	1305	0.54335	0.1784
GO:0002775	antimicrobial peptide production	41	3	3.83	1831	0.75107	0.17857
GO:0023014	signal transduction by protein phosphorylation	151	13	14.11	1629	0.66443	0.17864
GO:0072350	tricarboxylic acid metabolic process	34	2	3.18	2033	0.84027	0.17865
GO:0044782	cilium organization	45	3	4.2	1948	0.80535	0.17866
GO:0051052	regulation of DNA metabolic process	62	4	5.79	2040	0.84382	0.17881
GO:0009913	epidermal cell differentiation	42	2	3.92	2202	0.91405	0.17884
GO:0046395	carboxylic acid catabolic process	86	6	8.04	1995	0.82691	0.17887
GO:0002682	regulation of immune system process	187	14	17.47	2041	0.84462	0.17925
GO:0007622	rhythmic behavior	86	4	8.04	2406	0.96589	0.17937
GO:0051963	regulation of synapse assembly	98	5	9.16	2368	0.95849	0.17941
GO:0051049	regulation of transport	227	17	21.21	2082	0.8641	0.17944
GO:0000470	maturation of LSU-rRNA	24	4	2.24	615	0.18099	0.18099
GO:0045924	regulation of female receptivity	16	3	1.49	620	0.18311	0.18311
GO:0046323	glucose import	16	3	1.49	621	0.18311	0.18311
GO:0019538	protein metabolic process	1877	161	175.38	2217	0.91544	0.18323
GO:0009953	dorsal/ventral pattern formation	129	12	12.05	1382	0.55145	0.18399
GO:0033674	positive regulation of kinase activity	70	6	6.54	1572	0.64883	0.18426
GO:0009790	embryo development	445	66	41.58	32	7.9e-05	0.19126
GO:0007444	imaginal disc development	457	53	42.7	333	0.05501	0.19407
GO:0008586	imaginal disc-derived wing vein morphogenesis	42	6	3.92	632	0.19424	0.19424
GO:0048067	cuticle pigmentation	40	8	3.74	280	0.02918	0.20124
GO:0045456	ecdysteroid biosynthetic process	20	6	1.87	174	0.00805	0.2013
GO:0035222	wing disc pattern formation	60	9	5.61	485	0.10343	0.20164
GO:0006520	cellular amino acid metabolic process	145	15	13.55	869	0.37874	0.20254
GO:0009611	response to wounding	104	11	9.72	871	0.37944	0.20262
GO:0032879	regulation of localization	351	34	32.8	1021	0.43848	0.20266
GO:0006020	inositol metabolic process	9	2	0.84	637	0.20268	0.20268
GO:0006309	apoptotic DNA fragmentation	9	2	0.84	638	0.20268	0.20268
GO:0006879	cellular iron ion homeostasis	9	2	0.84	639	0.20268	0.20268
GO:0007414	axonal defasciculation	9	2	0.84	640	0.20268	0.20268
GO:0007519	skeletal muscle tissue development	9	2	0.84	641	0.20268	0.20268
GO:0008062	eclosion rhythm	9	2	0.84	642	0.20268	0.20268
GO:0009253	peptidoglycan catabolic process	9	2	0.84	643	0.20268	0.20268
GO:0045314	regulation of compound eye photoreceptor development	9	2	0.84	644	0.20268	0.20268
GO:0046845	branched duct epithelial cell fate determination, open tracheal system	9	2	0.84	645	0.20268	0.20268
GO:0060361	flight	9	2	0.84	646	0.20268	0.20268
GO:0007623	circadian rhythm	129	9	12.05	2081	0.8633	0.20413
GO:0032507	maintenance of protein location in cell	29	5	2.71	517	0.12837	0.20737
GO:0007469	antennal development	17	3	1.59	659	0.20791	0.20791
GO:0033627	cell adhesion mediated by integrin	17	3	1.59	660	0.20791	0.20791
GO:0007507	heart development	88	16	8.22	157	0.00685	0.21612
GO:0008587	imaginal disc-derived wing margin morphogenesis	44	5	4.11	979	0.39384	0.22147
GO:0007602	phototransduction	51	5	4.77	1280	0.52475	0.22198
GO:0009058	biosynthetic process	2009	171	187.72	2278	0.94043	0.22343
GO:0000902	cell morphogenesis	466	62	43.54	111	0.00235	0.22696
GO:0048646	anatomical structure formation involved in morphogenesis	440	59	41.11	112	0.00249	0.22917
GO:0006400	tRNA modification	48	10	4.48	206	0.0118	0.23057
GO:0045165	cell fate commitment	261	39	24.39	100	0.00202	0.23118
GO:0043604	amide biosynthetic process	449	45	41.95	822	0.3291	0.23216
GO:0098609	cell-cell adhesion	89	19	8.32	55	0.00046	0.23344
GO:0007416	synapse assembly	149	9	13.92	2298	0.94606	0.23768
GO:0050773	regulation of dendrite development	40	5	3.74	811	0.31711	0.23844
GO:0002230	positive regulation of defense response to virus by host	10	2	0.93	687	0.23855	0.23855
GO:0003341	cilium movement	10	2	0.93	688	0.23855	0.23855
GO:0007628	adult walking behavior	10	2	0.93	689	0.23855	0.23855
GO:0009744	response to sucrose	10	2	0.93	690	0.23855	0.23855
GO:0016201	synaptic target inhibition	10	2	0.93	691	0.23855	0.23855
GO:0035158	regulation of tube diameter, open tracheal system	10	2	0.93	692	0.23855	0.23855
GO:0040034	regulation of development, heterochronic	10	2	0.93	693	0.23855	0.23855
GO:0045292	mRNA cis splicing, via spliceosome	10	2	0.93	694	0.23855	0.23855
GO:0045752	positive regulation of Toll signaling pathway	10	2	0.93	695	0.23855	0.23855
GO:2001234	negative regulation of apoptotic signaling pathway	10	2	0.93	696	0.23855	0.23855
GO:0042325	regulation of phosphorylation	231	19	21.58	1854	0.75609	0.24053
GO:0048513	animal organ development	968	117	90.45	86	0.00135	0.24487
GO:0048598	embryonic morphogenesis	192	32	17.94	77	0.00082	0.25033
GO:0048546	digestive tract morphogenesis	54	14	5.05	49	0.00032	0.25216
GO:0048619	embryonic hindgut morphogenesis	40	11	3.74	76	0.00081	0.25274
GO:0051270	regulation of cellular component movement	51	11	4.77	151	0.00645	0.25309
GO:0048568	embryonic organ development	46	10	4.3	176	0.00871	0.25327
GO:0000154	rRNA modification	24	6	2.24	252	0.02027	0.25394
GO:0060446	branching involved in open tracheal system development	47	8	4.39	367	0.06739	0.25399
GO:0044550	secondary metabolite biosynthetic process	26	6	2.43	282	0.02957	0.254
GO:0035223	leg disc pattern formation	14	4	1.31	301	0.03539	0.2543
GO:0045596	negative regulation of cell differentiation	95	11	8.88	736	0.27182	0.25449
GO:0043067	regulation of programmed cell death	204	21	19.06	847	0.35263	0.25455
GO:0018991	oviposition	15	3	1.4	571	0.15917	0.25467
GO:0046349	amino sugar biosynthetic process	8	2	0.75	595	0.16752	0.25479
GO:0042044	fluid transport	21	3	1.96	800	0.3123	0.25486
GO:0007568	aging	140	14	13.08	1018	0.43623	0.2549
GO:0006584	catecholamine metabolic process	14	2	1.31	872	0.38137	0.25498
GO:0010243	response to organonitrogen compound	102	9	9.53	1481	0.62251	0.2554
GO:0048278	vesicle docking	28	2	2.62	1840	0.75133	0.25542
GO:0007091	metaphase/anaphase transition of mitotic cell cycle	30	2	2.8	1909	0.7849	0.25548
GO:0055002	striated muscle cell development	54	4	5.05	1855	0.75612	0.25557
GO:0007450	dorsal/ventral pattern formation, imaginal disc	45	3	4.2	1949	0.80535	0.25562
GO:0048638	regulation of developmental growth	188	16	17.57	1663	0.69155	0.25576
GO:0035265	organ growth	61	4	5.7	2025	0.83454	0.25579
GO:0016485	protein processing	59	11	5.51	248	0.01918	0.25699
GO:0019637	organophosphate metabolic process	339	21	31.68	2522	0.98738	0.259
GO:0010629	negative regulation of gene expression	472	37	44.1	2157	0.89532	0.26678
GO:0007409	axonogenesis	271	40	25.32	110	0.00224	0.27182
GO:0009996	negative regulation of cell fate specification	17	4	1.59	365	0.06735	0.27384
GO:0040014	regulation of multicellular organism growth	41	6	3.83	613	0.17963	0.27398
GO:0002027	regulation of heart rate	11	2	1.03	740	0.27468	0.27468
GO:0007295	growth of a germarium-derived egg chamber	11	2	1.03	741	0.27468	0.27468
GO:0007412	axon target recognition	11	2	1.03	742	0.27468	0.27468
GO:0019432	triglyceride biosynthetic process	11	2	1.03	743	0.27468	0.27468
GO:0043052	thermotaxis	11	2	1.03	744	0.27468	0.27468
GO:0060070	canonical Wnt signaling pathway	66	7	6.17	1014	0.42175	0.27476
GO:0007446	imaginal disc growth	38	3	3.55	1721	0.70287	0.27557
GO:0016199	axon midline choice point recognition	20	3	1.87	762	0.28575	0.28575
GO:0035149	lumen formation, open tracheal system	20	3	1.87	763	0.28575	0.28575
GO:0007275	multicellular organism development	1822	203	170.24	91	0.00158	0.28664
GO:0030718	germ-line stem cell population maintenance	65	9	6.07	556	0.14926	0.30456
GO:0006805	xenobiotic metabolic process	12	2	1.12	783	0.31072	0.31072
GO:0007016	cytoskeletal anchoring at plasma membrane	12	2	1.12	784	0.31072	0.31072
GO:0010107	potassium ion import	12	2	1.12	785	0.31072	0.31072
GO:0030536	larval feeding behavior	12	2	1.12	786	0.31072	0.31072
GO:0034389	lipid particle organization	12	2	1.12	787	0.31072	0.31072
GO:0034614	cellular response to reactive oxygen species	12	2	1.12	788	0.31072	0.31072
GO:0016476	regulation of embryonic cell shape	23	3	2.15	853	0.36544	0.31073
GO:0035159	regulation of tube length, open tracheal system	31	5	2.9	566	0.15815	0.31143
GO:0035162	embryonic hemopoiesis	21	3	1.96	801	0.3123	0.3123
GO:0040018	positive regulation of multicellular organism growth	21	3	1.96	802	0.3123	0.3123
GO:0031032	actomyosin structure organization	86	6	8.04	1996	0.82691	0.31258
GO:0010927	cellular component assembly involved in morphogenesis	125	25	11.68	42	0.00018	0.31932
GO:0030497	fatty acid elongation	17	7	1.59	57	0.00051	0.32265
GO:0001510	RNA methylation	41	9	3.83	205	0.01178	0.32274
GO:0007354	zygotic determination of anterior/posterior axis, embryo	24	6	2.24	253	0.02027	0.32333
GO:0010632	regulation of epithelial cell migration	15	5	1.4	180	0.00952	0.32339
GO:0035051	cardiocyte differentiation	21	5	1.96	307	0.04044	0.32362
GO:0051651	maintenance of location in cell	33	6	3.08	419	0.08197	0.32367
GO:0000469	cleavage involved in rRNA processing	19	4	1.78	439	0.09472	0.32396
GO:0035154	terminal cell fate specification, open tracheal system	10	3	0.93	351	0.05922	0.32402
GO:0006109	regulation of carbohydrate metabolic process	21	4	1.96	513	0.12647	0.32403
GO:0045597	positive regulation of cell differentiation	86	10	8.04	757	0.28085	0.32406
GO:0006726	eye pigment biosynthetic process	34	5	3.18	655	0.20741	0.32412
GO:0010557	positive regulation of macromolecule biosynthetic process	356	35	33.26	984	0.40038	0.32414
GO:0042386	hemocyte differentiation	36	5	3.36	711	0.24269	0.3242
GO:1902667	regulation of axon guidance	17	3	1.59	661	0.20791	0.32429
GO:0007485	imaginal disc-derived male genitalia development	18	3	1.68	685	0.2334	0.32433
GO:0006826	iron ion transport	9	2	0.84	647	0.20268	0.32439
GO:0071684	organism emergence from protective structure	20	3	1.87	764	0.28575	0.3244
GO:0060795	cell fate commitment involved in formation of primary germ layer	10	2	0.93	697	0.23855	0.32443
GO:0006165	nucleoside diphosphate phosphorylation	21	3	1.96	803	0.3123	0.32444
GO:0000054	ribosomal subunit export from nucleus	11	2	1.03	745	0.27468	0.32447
GO:0050714	positive regulation of protein secretion	11	2	1.03	746	0.27468	0.32447
GO:1905954	positive regulation of lipid localization	11	2	1.03	747	0.27468	0.32447
GO:0043687	post-translational protein modification	12	2	1.12	789	0.31072	0.32451
GO:0071901	negative regulation of protein serine/threonine kinase activity	12	2	1.12	790	0.31072	0.32451
GO:0044057	regulation of system process	47	5	4.39	1109	0.45102	0.32462
GO:0006963	positive regulation of antibacterial peptide biosynthetic process	15	2	1.4	990	0.41556	0.32462
GO:0035196	production of miRNAs involved in gene silencing by miRNA	16	2	1.49	1093	0.44876	0.32466
GO:0002684	positive regulation of immune system process	74	6	6.91	1718	0.7018	0.32525
GO:0009206	purine ribonucleoside triphosphate biosynthetic process	42	3	3.92	1863	0.76568	0.32525
GO:0032886	regulation of microtubule-based process	44	2	4.11	2237	0.9267	0.32573
GO:0030041	actin filament polymerization	56	3	5.23	2188	0.9057	0.32579
GO:0030705	cytoskeleton-dependent intracellular transport	56	3	5.23	2189	0.9057	0.32579
GO:0099504	synaptic vesicle cycle	100	5	9.34	2385	0.96339	0.32667
GO:0042059	negative regulation of epidermal growth factor receptor signaling pathway	31	4	2.9	820	0.32816	0.32816
GO:0010604	positive regulation of macromolecule metabolic process	595	47	55.6	2199	0.91174	0.3287
GO:2000112	regulation of cellular macromolecule biosynthetic process	1021	69	95.4	2677	0.99939	0.33735
GO:0002168	instar larval development	60	7	5.61	818	0.32712	0.33852
GO:0061057	peptidoglycan recognition protein signaling pathway	22	3	2.06	825	0.3389	0.3389
GO:0009950	dorsal/ventral axis specification	70	7	6.54	1152	0.48436	0.33932
GO:0055059	asymmetric neuroblast division	38	4	3.55	1135	0.48028	0.33933
GO:0009166	nucleotide catabolic process	30	4	2.8	777	0.30622	0.34608
GO:0007204	positive regulation of cytosolic calcium ion concentration	13	2	1.21	832	0.34636	0.34636
GO:0035002	liquid clearance, open tracheal system	13	2	1.21	833	0.34636	0.34636
GO:0008286	insulin receptor signaling pathway	34	3	3.18	1539	0.62798	0.34702
GO:0030490	maturation of SSU-rRNA	46	4	4.3	1547	0.63472	0.3471
GO:0051171	regulation of nitrogen compound metabolic process	1445	90	135.02	2772	1	0.34755
GO:0003333	amino acid transmembrane transport	32	4	2.99	845	0.35018	0.35018
GO:0006091	generation of precursor metabolites and energy	151	9	14.11	2339	0.95119	0.35044
GO:0007015	actin filament organization	129	10	12.05	1902	0.77747	0.36197
GO:0055085	transmembrane transport	447	38	41.77	1859	0.75985	0.37414
GO:0008283	cell proliferation	305	28	28.5	1405	0.57001	0.37671
GO:0007464	R3/R4 cell fate commitment	14	2	1.31	873	0.38137	0.38137
GO:0048803	imaginal disc-derived male genitalia morphogenesis	14	2	1.31	874	0.38137	0.38137
GO:0016334	establishment or maintenance of polarity of follicular epithelium	26	3	2.43	1023	0.44353	0.38146
GO:0009792	embryo development ending in birth or egg hatching	157	22	14.67	296	0.0345	0.38453
GO:0048865	stem cell fate commitment	26	8	2.43	96	0.0019	0.38541
GO:0006364	rRNA processing	132	21	12.33	197	0.01041	0.38547
GO:0060322	head development	108	15	10.09	408	0.07647	0.3857
GO:0010001	glial cell differentiation	35	7	3.27	304	0.04013	0.38627
GO:0010002	cardioblast differentiation	15	4	1.4	320	0.04479	0.38679
GO:0017145	stem cell division	84	10	7.85	723	0.25676	0.387
GO:0042684	cardioblast cell fate commitment	10	3	0.93	352	0.05922	0.38704
GO:0006739	NADP metabolic process	12	3	1.12	435	0.09449	0.38713
GO:0042058	regulation of epidermal growth factor receptor signaling pathway	46	6	4.3	720	0.25658	0.38721
GO:1904799	regulation of neuron remodeling	10	2	0.93	698	0.23855	0.38751
GO:0005977	glycogen metabolic process	24	3	2.24	967	0.39179	0.38765
GO:0006144	purine nucleobase metabolic process	14	2	1.31	875	0.38137	0.38768
GO:0000447	endonucleolytic cleavage in ITS1 to separate SSU-rRNA from 5.8S rRNA and LSU-rRNA from tricistronic ...	5	1	0.47	885	0.38775	0.38775
GO:0001706	endoderm formation	5	1	0.47	886	0.38775	0.38775
GO:0002792	negative regulation of peptide secretion	5	1	0.47	887	0.38775	0.38775
GO:0006031	chitin biosynthetic process	5	1	0.47	888	0.38775	0.38775
GO:0006034	cuticle chitin metabolic process	5	1	0.47	889	0.38775	0.38775
GO:0006501	C-terminal protein lipidation	5	1	0.47	890	0.38775	0.38775
GO:0006716	juvenile hormone metabolic process	5	1	0.47	891	0.38775	0.38775
GO:0006723	cuticle hydrocarbon biosynthetic process	5	1	0.47	892	0.38775	0.38775
GO:0006777	Mo-molybdopterin cofactor biosynthetic process	5	1	0.47	893	0.38775	0.38775
GO:0006939	smooth muscle contraction	5	1	0.47	894	0.38775	0.38775
GO:0007004	telomere maintenance via telomerase	5	1	0.47	895	0.38775	0.38775
GO:0007191	adenylate cyclase-activating dopamine receptor signaling pathway	5	1	0.47	896	0.38775	0.38775
GO:0007451	dorsal/ventral lineage restriction, imaginal disc	5	1	0.47	897	0.38775	0.38775
GO:0007486	imaginal disc-derived female genitalia development	5	1	0.47	898	0.38775	0.38775
GO:0007487	analia development	5	1	0.47	899	0.38775	0.38775
GO:0008335	female germline ring canal stabilization	5	1	0.47	900	0.38775	0.38775
GO:0009147	pyrimidine nucleoside triphosphate metabolic process	5	1	0.47	901	0.38775	0.38775
GO:0010171	body morphogenesis	5	1	0.47	902	0.38775	0.38775
GO:0015837	amine transport	5	1	0.47	903	0.38775	0.38775
GO:0015858	nucleoside transport	5	1	0.47	904	0.38775	0.38775
GO:0016601	Rac protein signal transduction	5	1	0.47	905	0.38775	0.38775
GO:0019099	female germ-line sex determination	5	1	0.47	906	0.38775	0.38775
GO:0021954	central nervous system neuron development	5	1	0.47	907	0.38775	0.38775
GO:0022600	digestive system process	5	1	0.47	908	0.38775	0.38775
GO:0030104	water homeostasis	5	1	0.47	909	0.38775	0.38775
GO:0030335	positive regulation of cell migration	5	1	0.47	910	0.38775	0.38775
GO:0031623	receptor internalization	5	1	0.47	911	0.38775	0.38775
GO:0032780	negative regulation of ATPase activity	5	1	0.47	912	0.38775	0.38775
GO:0034312	diol biosynthetic process	5	1	0.47	913	0.38775	0.38775
GO:0034755	iron ion transmembrane transport	5	1	0.47	914	0.38775	0.38775
GO:0035721	intraciliary retrograde transport	5	1	0.47	915	0.38775	0.38775
GO:0038061	NIK/NF-kappaB signaling	5	1	0.47	916	0.38775	0.38775
GO:0042682	regulation of compound eye cone cell fate specification	5	1	0.47	917	0.38775	0.38775
GO:0042694	muscle cell fate specification	5	1	0.47	918	0.38775	0.38775
GO:0043096	purine nucleobase salvage	5	1	0.47	919	0.38775	0.38775
GO:0043388	positive regulation of DNA binding	5	1	0.47	920	0.38775	0.38775
GO:0045069	regulation of viral genome replication	5	1	0.47	921	0.38775	0.38775
GO:0045464	R8 cell fate specification	5	1	0.47	922	0.38775	0.38775
GO:0046132	pyrimidine ribonucleoside biosynthetic process	5	1	0.47	923	0.38775	0.38775
GO:0046692	sperm competition	5	1	0.47	924	0.38775	0.38775
GO:0048076	regulation of compound eye pigmentation	5	1	0.47	925	0.38775	0.38775
GO:0048383	mesectoderm development	5	1	0.47	926	0.38775	0.38775
GO:0048644	muscle organ morphogenesis	5	1	0.47	927	0.38775	0.38775
GO:0050482	arachidonic acid secretion	5	1	0.47	928	0.38775	0.38775
GO:0050848	regulation of calcium-mediated signaling	5	1	0.47	929	0.38775	0.38775
GO:0050916	sensory perception of sweet taste	5	1	0.47	930	0.38775	0.38775
GO:0051569	regulation of histone H3-K4 methylation	5	1	0.47	931	0.38775	0.38775
GO:0060439	trachea morphogenesis	5	1	0.47	932	0.38775	0.38775
GO:0070873	regulation of glycogen metabolic process	5	1	0.47	933	0.38775	0.38775
GO:0070920	regulation of production of small RNA involved in gene silencing by RNA	5	1	0.47	934	0.38775	0.38775
GO:0090382	phagosome maturation	5	1	0.47	935	0.38775	0.38775
GO:0097191	extrinsic apoptotic signaling pathway	5	1	0.47	936	0.38775	0.38775
GO:0097374	sensory neuron axon guidance	5	1	0.47	937	0.38775	0.38775
GO:0098700	neurotransmitter loading into synaptic vesicle	5	1	0.47	938	0.38775	0.38775
GO:1900078	positive regulation of cellular response to insulin stimulus	5	1	0.47	939	0.38775	0.38775
GO:1901070	guanosine-containing compound biosynthetic process	5	1	0.47	940	0.38775	0.38775
GO:1904801	positive regulation of neuron remodeling	5	1	0.47	941	0.38775	0.38775
GO:2000677	regulation of transcription regulatory region DNA binding	5	1	0.47	942	0.38775	0.38775
GO:2001022	positive regulation of response to DNA damage stimulus	5	1	0.47	943	0.38775	0.38775
GO:0006914	autophagy	140	5	13.08	2626	0.99763	0.38778
GO:0043902	positive regulation of multi-organism process	43	4	4.02	1410	0.58031	0.38801
GO:0006898	receptor-mediated endocytosis	33	3	3.08	1474	0.60735	0.38804
GO:0006575	cellular modified amino acid metabolic process	63	5	5.89	1732	0.71346	0.38841
GO:0060179	male mating behavior	46	3	4.3	1985	0.81725	0.3886
GO:0071214	cellular response to abiotic stimulus	63	4	5.89	2058	0.85265	0.38888
GO:0006915	apoptotic process	231	23	21.58	986	0.40586	0.39116
GO:0031399	regulation of protein modification process	296	20	27.66	2359	0.95699	0.39169
GO:0036099	female germ-line stem cell population maintenance	24	3	2.24	968	0.39179	0.39179
GO:0036335	intestinal stem cell homeostasis	24	3	2.24	969	0.39179	0.39179
GO:0042060	wound healing	77	8	7.19	1017	0.43169	0.39248
GO:0044085	cellular component biogenesis	1107	94	103.44	2087	0.86796	0.39318
GO:0050790	regulation of catalytic activity	292	16	27.28	2586	0.99501	0.39343
GO:0048518	positive regulation of biological process	1168	83	109.13	2648	0.99869	0.40231
GO:0035151	regulation of tube size, open tracheal system	46	7	4.3	521	0.13314	0.41397
GO:0044272	sulfur compound biosynthetic process	33	4	3.08	861	0.37221	0.41532
GO:0016266	O-glycan processing	15	2	1.4	991	0.41556	0.41556
GO:1901700	response to oxygen-containing compound	219	20	20.46	1409	0.57848	0.41638
GO:0050830	defense response to Gram-positive bacterium	25	3	2.34	1006	0.41785	0.41785
GO:0090090	negative regulation of canonical Wnt signaling pathway	25	3	2.34	1007	0.41785	0.41785
GO:0007059	chromosome segregation	170	7	15.88	2618	0.99713	0.42282
GO:0031175	neuron projection development	388	52	36.25	135	0.00446	0.43682
GO:0045746	negative regulation of Notch signaling pathway	36	4	3.36	1020	0.43771	0.43771
GO:0048569	post-embryonic animal organ development	369	44	34.48	332	0.05239	0.44017
GO:0007442	hindgut morphogenesis	46	12	4.3	74	0.00079	0.44131
GO:0043436	oxoacid metabolic process	332	36	31.02	631	0.19192	0.44261
GO:0001654	eye development	322	34	30.09	716	0.24767	0.44317
GO:0045785	positive regulation of cell adhesion	16	5	1.49	215	0.0128	0.44345
GO:0048749	compound eye development	304	29	28.4	1151	0.48236	0.44404
GO:0050919	negative chemotaxis	16	3	1.49	622	0.18311	0.44446
GO:0006308	DNA catabolic process	17	3	1.59	662	0.20791	0.44451
GO:0032259	methylation	114	12	10.65	868	0.37664	0.44454
GO:0046129	purine ribonucleoside biosynthetic process	11	2	1.03	748	0.27468	0.44473
GO:0072348	sulfur compound transport	16	2	1.49	1094	0.44876	0.44497
GO:0000729	DNA double-strand break processing	6	1	0.56	1029	0.445	0.445
GO:0001710	mesodermal cell fate commitment	6	1	0.56	1030	0.445	0.445
GO:0005978	glycogen biosynthetic process	6	1	0.56	1031	0.445	0.445
GO:0006013	mannose metabolic process	6	1	0.56	1032	0.445	0.445
GO:0006356	regulation of transcription by RNA polymerase I	6	1	0.56	1033	0.445	0.445
GO:0006884	cell volume homeostasis	6	1	0.56	1034	0.445	0.445
GO:0007348	regulation of syncytial blastoderm mitotic cell cycle	6	1	0.56	1035	0.445	0.445
GO:0007477	notum development	6	1	0.56	1036	0.445	0.445
GO:0007506	gonadal mesoderm development	6	1	0.56	1037	0.445	0.445
GO:0009226	nucleotide-sugar biosynthetic process	6	1	0.56	1038	0.445	0.445
GO:0009303	rRNA transcription	6	1	0.56	1039	0.445	0.445
GO:0010496	intercellular transport	6	1	0.56	1040	0.445	0.445
GO:0016114	terpenoid biosynthetic process	6	1	0.56	1041	0.445	0.445
GO:0016540	protein autoprocessing	6	1	0.56	1042	0.445	0.445
GO:0019101	female somatic sex determination	6	1	0.56	1043	0.445	0.445
GO:0019226	transmission of nerve impulse	6	1	0.56	1044	0.445	0.445
GO:0030336	negative regulation of cell migration	6	1	0.56	1045	0.445	0.445
GO:0030728	ovulation	6	1	0.56	1046	0.445	0.445
GO:0030950	establishment or maintenance of actin cytoskeleton polarity	6	1	0.56	1047	0.445	0.445
GO:0031397	negative regulation of protein ubiquitination	6	1	0.56	1048	0.445	0.445
GO:0032367	intracellular cholesterol transport	6	1	0.56	1049	0.445	0.445
GO:0032922	circadian regulation of gene expression	6	1	0.56	1050	0.445	0.445
GO:0032924	activin receptor signaling pathway	6	1	0.56	1051	0.445	0.445
GO:0034067	protein localization to Golgi apparatus	6	1	0.56	1052	0.445	0.445
GO:0035074	pupation	6	1	0.56	1053	0.445	0.445
GO:0040031	snRNA modification	6	1	0.56	1054	0.445	0.445
GO:0043266	regulation of potassium ion transport	6	1	0.56	1055	0.445	0.445
GO:0043519	regulation of myosin II filament organization	6	1	0.56	1056	0.445	0.445
GO:0044036	cell wall macromolecule metabolic process	6	1	0.56	1057	0.445	0.445
GO:0044130	negative regulation of growth of symbiont in host	6	1	0.56	1058	0.445	0.445
GO:0045199	maintenance of epithelial cell apical/basal polarity	6	1	0.56	1059	0.445	0.445
GO:0046039	GTP metabolic process	6	1	0.56	1060	0.445	0.445
GO:0046085	adenosine metabolic process	6	1	0.56	1061	0.445	0.445
GO:0048148	behavioral response to cocaine	6	1	0.56	1062	0.445	0.445
GO:0048841	regulation of axon extension involved in axon guidance	6	1	0.56	1063	0.445	0.445
GO:0055078	sodium ion homeostasis	6	1	0.56	1064	0.445	0.445
GO:0090481	pyrimidine nucleotide-sugar transmembrane transport	6	1	0.56	1065	0.445	0.445
GO:0097206	nephrocyte filtration	6	1	0.56	1066	0.445	0.445
GO:1901216	positive regulation of neuron death	6	1	0.56	1067	0.445	0.445
GO:2000104	negative regulation of DNA-dependent DNA replication	6	1	0.56	1068	0.445	0.445
GO:2000105	positive regulation of DNA-dependent DNA replication	6	1	0.56	1069	0.445	0.445
GO:2000370	positive regulation of clathrin-dependent endocytosis	6	1	0.56	1070	0.445	0.445
GO:0051294	establishment of spindle orientation	22	2	2.06	1483	0.62286	0.44525
GO:0000086	G2/M transition of mitotic cell cycle	34	3	3.18	1540	0.62798	0.44531
GO:0035088	establishment or maintenance of apical/basal cell polarity	35	3	3.27	1566	0.64785	0.44536
GO:0045927	positive regulation of growth	91	8	8.5	1538	0.62557	0.44548
GO:0120031	plasma membrane bounded cell projection assembly	91	4	8.5	2447	0.97581	0.44751
GO:0006487	protein N-linked glycosylation	32	5	2.99	608	0.17401	0.44759
GO:0045786	negative regulation of cell cycle	94	4	8.78	2470	0.98039	0.44766
GO:0045807	positive regulation of endocytosis	29	4	2.71	759	0.28445	0.44815
GO:0009649	entrainment of circadian clock	16	2	1.49	1095	0.44876	0.44876
GO:0032012	regulation of ARF protein signal transduction	16	2	1.49	1096	0.44876	0.44876
GO:0046854	phosphatidylinositol phosphorylation	16	2	1.49	1097	0.44876	0.44876
GO:0042078	germ-line stem cell division	37	4	3.46	1114	0.45914	0.45914
GO:0042254	ribosome biogenesis	197	38	18.41	21	1e-05	0.46502
GO:0016203	muscle attachment	34	4	3.18	980	0.39419	0.46841
GO:0008347	glial cell migration	27	3	2.52	1122	0.46876	0.46876
GO:1901362	organic cyclic compound biosynthetic process	1183	89	110.54	2567	0.99302	0.46905
GO:0042067	establishment of ommatidial planar polarity	50	11	4.67	146	0.00551	0.47611
GO:0048477	oogenesis	552	67	51.58	230	0.01369	0.47999
GO:0048814	regulation of dendrite morphogenesis	27	3	2.52	1123	0.46876	0.48083
GO:0006096	glycolytic process	17	2	1.59	1137	0.48088	0.48088
GO:0007179	transforming growth factor beta receptor signaling pathway	17	2	1.59	1138	0.48088	0.48088
GO:0045176	apical protein localization	17	2	1.59	1139	0.48088	0.48088
GO:0008340	determination of adult lifespan	134	13	12.52	1156	0.4867	0.4867
GO:0010647	positive regulation of cell communication	311	22	29.06	2275	0.93847	0.4871
GO:0023056	positive regulation of signaling	311	22	29.06	2276	0.93847	0.4871
GO:0001736	establishment of planar polarity	88	14	8.22	291	0.03271	0.48794
GO:0051603	proteolysis involved in cellular protein catabolic process	231	9	21.58	2687	0.99959	0.49154
GO:0045595	regulation of cell differentiation	290	32	27.1	614	0.18095	0.49437
GO:0045455	ecdysteroid metabolic process	28	7	2.62	208	0.01247	0.49474
GO:0043647	inositol phosphate metabolic process	15	3	1.4	572	0.15917	0.49623
GO:0030048	actin filament-based movement	26	4	2.43	674	0.22094	0.49624
GO:0090068	positive regulation of cell cycle process	33	4	3.08	862	0.37221	0.49659
GO:0006360	transcription by RNA polymerase I	13	2	1.21	834	0.34636	0.49666
GO:0048260	positive regulation of receptor-mediated endocytosis	13	2	1.21	835	0.34636	0.49666
GO:0003383	apical constriction	17	2	1.59	1140	0.48088	0.49686
GO:0000055	ribosomal large subunit export from nucleus	7	1	0.65	1161	0.4969	0.4969
GO:0000712	resolution of meiotic recombination intermediates	7	1	0.65	1162	0.4969	0.4969
GO:0001682	tRNA 5'-leader removal	7	1	0.65	1163	0.4969	0.4969
GO:0006541	glutamine metabolic process	7	1	0.65	1164	0.4969	0.4969
GO:0007111	meiosis II cytokinesis	7	1	0.65	1165	0.4969	0.4969
GO:0007380	specification of segmental identity, head	7	1	0.65	1166	0.4969	0.4969
GO:0007539	primary sex determination, soma	7	1	0.65	1167	0.4969	0.4969
GO:0009220	pyrimidine ribonucleotide biosynthetic process	7	1	0.65	1168	0.4969	0.4969
GO:0010771	negative regulation of cell morphogenesis involved in differentiation	7	1	0.65	1169	0.4969	0.4969
GO:0010884	positive regulation of lipid storage	7	1	0.65	1170	0.4969	0.4969
GO:0016204	determination of muscle attachment site	7	1	0.65	1171	0.4969	0.4969
GO:0016335	morphogenesis of larval imaginal disc epithelium	7	1	0.65	1172	0.4969	0.4969
GO:0031034	myosin filament assembly	7	1	0.65	1173	0.4969	0.4969
GO:0031053	primary miRNA processing	7	1	0.65	1174	0.4969	0.4969
GO:0031054	pre-miRNA processing	7	1	0.65	1175	0.4969	0.4969
GO:0032368	regulation of lipid transport	7	1	0.65	1176	0.4969	0.4969
GO:0032413	negative regulation of ion transmembrane transporter activity	7	1	0.65	1177	0.4969	0.4969
GO:0032414	positive regulation of ion transmembrane transporter activity	7	1	0.65	1178	0.4969	0.4969
GO:0033353	S-adenosylmethionine cycle	7	1	0.65	1179	0.4969	0.4969
GO:0033539	fatty acid beta-oxidation using acyl-CoA dehydrogenase	7	1	0.65	1180	0.4969	0.4969
GO:0034030	ribonucleoside bisphosphate biosynthetic process	7	1	0.65	1181	0.4969	0.4969
GO:0034033	purine nucleoside bisphosphate biosynthetic process	7	1	0.65	1182	0.4969	0.4969
GO:0034394	protein localization to cell surface	7	1	0.65	1183	0.4969	0.4969
GO:0035262	gonad morphogenesis	7	1	0.65	1184	0.4969	0.4969
GO:0042595	behavioral response to starvation	7	1	0.65	1185	0.4969	0.4969
GO:0044728	DNA methylation or demethylation	7	1	0.65	1186	0.4969	0.4969
GO:0045842	positive regulation of mitotic metaphase/anaphase transition	7	1	0.65	1187	0.4969	0.4969
GO:0046113	nucleobase catabolic process	7	1	0.65	1188	0.4969	0.4969
GO:0046130	purine ribonucleoside catabolic process	7	1	0.65	1189	0.4969	0.4969
GO:0046533	negative regulation of photoreceptor cell differentiation	7	1	0.65	1190	0.4969	0.4969
GO:0046664	dorsal closure, amnioserosa morphology change	7	1	0.65	1191	0.4969	0.4969
GO:0046825	regulation of protein export from nucleus	7	1	0.65	1192	0.4969	0.4969
GO:0046831	regulation of RNA export from nucleus	7	1	0.65	1193	0.4969	0.4969
GO:0046902	regulation of mitochondrial membrane permeability	7	1	0.65	1194	0.4969	0.4969
GO:0048567	ectodermal digestive tract morphogenesis	7	1	0.65	1195	0.4969	0.4969
GO:0050982	detection of mechanical stimulus	7	1	0.65	1196	0.4969	0.4969
GO:0051238	sequestering of metal ion	7	1	0.65	1197	0.4969	0.4969
GO:0051926	negative regulation of calcium ion transport	7	1	0.65	1198	0.4969	0.4969
GO:0055083	monovalent inorganic anion homeostasis	7	1	0.65	1199	0.4969	0.4969
GO:0061320	pericardial nephrocyte differentiation	7	1	0.65	1200	0.4969	0.4969
GO:0061357	positive regulation of Wnt protein secretion	7	1	0.65	1201	0.4969	0.4969
GO:0070286	axonemal dynein complex assembly	7	1	0.65	1202	0.4969	0.4969
GO:0070475	rRNA base methylation	7	1	0.65	1203	0.4969	0.4969
GO:0072529	pyrimidine-containing compound catabolic process	7	1	0.65	1204	0.4969	0.4969
GO:0080009	mRNA methylation	7	1	0.65	1205	0.4969	0.4969
GO:0090527	actin filament reorganization	7	1	0.65	1206	0.4969	0.4969
GO:0097104	postsynaptic membrane assembly	7	1	0.65	1207	0.4969	0.4969
GO:1901019	regulation of calcium ion transmembrane transporter activity	7	1	0.65	1208	0.4969	0.4969
GO:1901739	regulation of myoblast fusion	7	1	0.65	1209	0.4969	0.4969
GO:1903076	regulation of protein localization to plasma membrane	7	1	0.65	1210	0.4969	0.4969
GO:1903828	negative regulation of cellular protein localization	7	1	0.65	1211	0.4969	0.4969
GO:1904063	negative regulation of cation transmembrane transport	7	1	0.65	1212	0.4969	0.4969
GO:0030522	intracellular receptor signaling pathway	21	2	1.96	1462	0.59704	0.49706
GO:0003012	muscle system process	32	3	2.99	1413	0.58598	0.49708
GO:0030177	positive regulation of Wnt signaling pathway	35	3	3.27	1567	0.64785	0.49723
GO:1901576	organic substance biosynthetic process	1984	168	185.38	2323	0.94801	0.50976
GO:0007476	imaginal disc-derived wing morphogenesis	220	24	20.56	706	0.23943	0.50977
GO:0008354	germ cell migration	38	6	3.55	551	0.13873	0.51007
GO:0098754	detoxification	26	3	2.43	1024	0.44353	0.51161
GO:0006491	N-glycan processing	18	2	1.68	1245	0.51181	0.51181
GO:0030968	endoplasmic reticulum unfolded protein response	18	2	1.68	1246	0.51181	0.51181
GO:0035293	chitin-based larval cuticle pattern formation	18	2	1.68	1247	0.51181	0.51181
GO:0046529	imaginal disc fusion, thorax closure	18	2	1.68	1248	0.51181	0.51181
GO:0046839	phospholipid dephosphorylation	18	2	1.68	1249	0.51181	0.51181
GO:0090288	negative regulation of cellular response to growth factor stimulus	18	2	1.68	1250	0.51181	0.51181
GO:0010648	negative regulation of cell communication	278	23	25.98	1861	0.76359	0.5146
GO:0023057	negative regulation of signaling	278	23	25.98	1862	0.76359	0.5146
GO:0010628	positive regulation of gene expression	373	36	34.85	1028	0.44424	0.51667
GO:0008407	chaeta morphogenesis	29	3	2.71	1271	0.51758	0.51758
GO:0031323	regulation of cellular metabolic process	1501	88	140.25	2780	1	0.53111
GO:0009887	animal organ morphogenesis	603	70	56.34	283	0.0299	0.53585
GO:0042255	ribosome assembly	42	12	3.92	51	0.00032	0.5396
GO:0008063	Toll signaling pathway	40	4	3.74	1278	0.52154	0.54148
GO:0007430	terminal branching, open tracheal system	19	2	1.78	1292	0.54151	0.54151
GO:0008362	chitin-based embryonic cuticle biosynthetic process	19	2	1.78	1293	0.54151	0.54151
GO:0042332	gravitaxis	19	2	1.78	1294	0.54151	0.54151
GO:0042274	ribosomal small subunit biogenesis	63	10	5.89	356	0.06563	0.5418
GO:0042461	photoreceptor cell development	100	13	9.34	550	0.13842	0.54205
GO:0008543	fibroblast growth factor receptor signaling pathway	15	5	1.4	181	0.00952	0.5421
GO:1901570	fatty acid derivative biosynthetic process	21	5	1.96	308	0.04044	0.54241
GO:0016319	mushroom body development	63	6	5.89	1308	0.54367	0.54367
GO:0045476	nurse cell apoptotic process	16	2	1.49	1098	0.44876	0.54381
GO:0001676	long-chain fatty acid metabolic process	8	1	0.75	1310	0.54395	0.54395
GO:0001742	oenocyte differentiation	8	1	0.75	1311	0.54395	0.54395
GO:0006488	dolichol-linked oligosaccharide biosynthetic process	8	1	0.75	1312	0.54395	0.54395
GO:0006688	glycosphingolipid biosynthetic process	8	1	0.75	1313	0.54395	0.54395
GO:0006896	Golgi to vacuole transport	8	1	0.75	1314	0.54395	0.54395
GO:0007158	neuron cell-cell adhesion	8	1	0.75	1315	0.54395	0.54395
GO:0007289	spermatid nucleus differentiation	8	1	0.75	1316	0.54395	0.54395
GO:0007319	negative regulation of oskar mRNA translation	8	1	0.75	1317	0.54395	0.54395
GO:0007343	egg activation	8	1	0.75	1318	0.54395	0.54395
GO:0008637	apoptotic mitochondrial changes	8	1	0.75	1319	0.54395	0.54395
GO:0009407	toxin catabolic process	8	1	0.75	1320	0.54395	0.54395
GO:0009642	response to light intensity	8	1	0.75	1321	0.54395	0.54395
GO:0015807	L-amino acid transport	8	1	0.75	1322	0.54395	0.54395
GO:0019221	cytokine-mediated signaling pathway	8	1	0.75	1323	0.54395	0.54395
GO:0030206	chondroitin sulfate biosynthetic process	8	1	0.75	1324	0.54395	0.54395
GO:0031629	synaptic vesicle fusion to presynaptic active zone membrane	8	1	0.75	1325	0.54395	0.54395
GO:0033314	mitotic DNA replication checkpoint	8	1	0.75	1326	0.54395	0.54395
GO:0034975	protein folding in endoplasmic reticulum	8	1	0.75	1327	0.54395	0.54395
GO:0035204	negative regulation of lamellocyte differentiation	8	1	0.75	1328	0.54395	0.54395
GO:0043407	negative regulation of MAP kinase activity	8	1	0.75	1329	0.54395	0.54395
GO:0043697	cell dedifferentiation	8	1	0.75	1330	0.54395	0.54395
GO:0045477	regulation of nurse cell apoptotic process	8	1	0.75	1331	0.54395	0.54395
GO:0045705	negative regulation of salivary gland boundary specification	8	1	0.75	1332	0.54395	0.54395
GO:0046673	negative regulation of compound eye retinal cell programmed cell death	8	1	0.75	1333	0.54395	0.54395
GO:0046686	response to cadmium ion	8	1	0.75	1334	0.54395	0.54395
GO:0048009	insulin-like growth factor receptor signaling pathway	8	1	0.75	1335	0.54395	0.54395
GO:0048738	cardiac muscle tissue development	8	1	0.75	1336	0.54395	0.54395
GO:0048935	peripheral nervous system neuron development	8	1	0.75	1337	0.54395	0.54395
GO:0050907	detection of chemical stimulus involved in sensory perception	8	1	0.75	1338	0.54395	0.54395
GO:0055075	potassium ion homeostasis	8	1	0.75	1339	0.54395	0.54395
GO:0072697	protein localization to cell cortex	8	1	0.75	1340	0.54395	0.54395
GO:0097105	presynaptic membrane assembly	8	1	0.75	1341	0.54395	0.54395
GO:0098659	inorganic cation import across plasma membrane	8	1	0.75	1342	0.54395	0.54395
GO:1902669	positive regulation of axon guidance	8	1	0.75	1343	0.54395	0.54395
GO:1903053	regulation of extracellular matrix organization	8	1	0.75	1344	0.54395	0.54395
GO:1903531	negative regulation of secretion by cell	8	1	0.75	1345	0.54395	0.54395
GO:1904064	positive regulation of cation transmembrane transport	8	1	0.75	1346	0.54395	0.54395
GO:2000242	negative regulation of reproductive process	8	1	0.75	1347	0.54395	0.54395
GO:0040001	establishment of mitotic spindle localization	24	2	2.24	1637	0.67061	0.54423
GO:0009755	hormone-mediated signaling pathway	35	3	3.27	1568	0.64785	0.54424
GO:0008544	epidermis development	50	3	4.67	2063	0.85886	0.54502
GO:0007186	G-protein coupled receptor signaling pathway	136	10	12.71	2022	0.82946	0.54642
GO:0001700	embryonic development via the syncytial blastoderm	152	21	14.2	311	0.04361	0.55291
GO:0042737	drug catabolic process	51	9	4.77	317	0.0445	0.55957
GO:0007608	sensory perception of smell	42	4	3.92	1387	0.56118	0.56118
GO:0045466	R7 cell differentiation	50	7	4.67	618	0.18182	0.56156
GO:0046331	lateral inhibition	31	3	2.9	1391	0.56387	0.56387
GO:0045089	positive regulation of innate immune response	47	4	4.39	1575	0.65181	0.56439
GO:0018130	heterocycle biosynthetic process	1147	81	107.17	2653	0.99881	0.56693
GO:0034599	cellular response to oxidative stress	32	4	2.99	846	0.35018	0.56919
GO:0046580	negative regulation of Ras protein signal transduction	20	2	1.87	1394	0.56993	0.56993
GO:0048675	axon extension	46	4	4.3	1548	0.63472	0.57029
GO:0048565	digestive tract development	85	22	7.94	18	7e-06	0.57864
GO:0044283	small molecule biosynthetic process	194	31	18.13	97	0.00198	0.57922
GO:0042446	hormone biosynthetic process	29	7	2.71	238	0.01515	0.58428
GO:0030334	regulation of cell migration	31	7	2.9	264	0.02169	0.58438
GO:1901605	alpha-amino acid metabolic process	88	10	8.22	776	0.30556	0.58569
GO:0046667	compound eye retinal cell programmed cell death	25	4	2.34	634	0.20067	0.58576
GO:0050708	regulation of protein secretion	20	3	1.87	765	0.28575	0.58606
GO:0035172	hemocyte proliferation	43	5	4.02	866	0.37462	0.58615
GO:0034620	cellular response to unfolded protein	27	3	2.52	1124	0.46876	0.58643
GO:0009593	detection of chemical stimulus	17	2	1.59	1141	0.48088	0.58647
GO:0030011	maintenance of cell polarity	18	2	1.68	1251	0.51181	0.58652
GO:0090502	RNA phosphodiester bond hydrolysis, endonucleolytic	19	2	1.78	1295	0.54151	0.58657
GO:0001508	action potential	9	1	0.84	1414	0.58661	0.58661
GO:0006072	glycerol-3-phosphate metabolic process	9	1	0.84	1415	0.58661	0.58661
GO:0006614	SRP-dependent cotranslational protein targeting to membrane	9	1	0.84	1416	0.58661	0.58661
GO:0006937	regulation of muscle contraction	9	1	0.84	1417	0.58661	0.58661
GO:0009086	methionine biosynthetic process	9	1	0.84	1418	0.58661	0.58661
GO:0018242	protein O-linked glycosylation via serine	9	1	0.84	1419	0.58661	0.58661
GO:0031000	response to caffeine	9	1	0.84	1420	0.58661	0.58661
GO:0040015	negative regulation of multicellular organism growth	9	1	0.84	1421	0.58661	0.58661
GO:0045003	double-strand break repair via synthesis-dependent strand annealing	9	1	0.84	1422	0.58661	0.58661
GO:0048140	male germ-line cyst encapsulation	9	1	0.84	1423	0.58661	0.58661
GO:0048753	pigment granule organization	9	1	0.84	1424	0.58661	0.58661
GO:0050686	negative regulation of mRNA processing	9	1	0.84	1425	0.58661	0.58661
GO:0060232	delamination	9	1	0.84	1426	0.58661	0.58661
GO:0070278	extracellular matrix constituent secretion	9	1	0.84	1427	0.58661	0.58661
GO:0090136	epithelial cell-cell adhesion	9	1	0.84	1428	0.58661	0.58661
GO:1902358	sulfate transmembrane transport	9	1	0.84	1429	0.58661	0.58661
GO:0045861	negative regulation of proteolysis	32	2	2.99	1974	0.81442	0.58726
GO:0007626	locomotory behavior	144	10	13.45	2117	0.8769	0.58868
GO:0016458	gene silencing	165	5	15.42	2698	0.99964	0.59266
GO:0006790	sulfur compound metabolic process	128	15	11.96	673	0.21339	0.5945
GO:0007017	microtubule-based process	322	15	30.09	2684	0.99956	0.5955
GO:0007480	imaginal disc-derived leg morphogenesis	65	8	6.07	724	0.25893	0.5965
GO:0051607	defense response to virus	38	4	3.55	1136	0.48028	0.5967
GO:0046578	regulation of Ras protein signal transduction	122	9	11.4	1984	0.81691	0.59911
GO:0042127	regulation of cell proliferation	192	17	17.94	1545	0.63048	0.60827
GO:0007350	blastoderm segmentation	169	24	15.79	266	0.02437	0.62055
GO:0048871	multicellular organismal homeostasis	54	11	5.05	192	0.01004	0.62192
GO:0007219	Notch signaling pathway	117	10	10.93	1627	0.66428	0.6236
GO:0048542	lymph gland development	46	7	4.3	522	0.13314	0.62378
GO:0006821	chloride transport	33	5	3.08	628	0.19045	0.62423
GO:0000302	response to reactive oxygen species	22	3	2.06	826	0.3389	0.62479
GO:0033692	cellular polysaccharide biosynthetic process	16	2	1.49	1099	0.44876	0.62504
GO:0000726	non-recombinational repair	10	1	0.93	1492	0.62528	0.62528
GO:0003384	apical constriction involved in gastrulation	10	1	0.93	1493	0.62528	0.62528
GO:0006084	acetyl-CoA metabolic process	10	1	0.93	1494	0.62528	0.62528
GO:0007026	negative regulation of microtubule depolymerization	10	1	0.93	1495	0.62528	0.62528
GO:0007096	regulation of exit from mitosis	10	1	0.93	1496	0.62528	0.62528
GO:0007436	larval salivary gland morphogenesis	10	1	0.93	1497	0.62528	0.62528
GO:0007488	histoblast morphogenesis	10	1	0.93	1498	0.62528	0.62528
GO:0010977	negative regulation of neuron projection development	10	1	0.93	1499	0.62528	0.62528
GO:0015695	organic cation transport	10	1	0.93	1500	0.62528	0.62528
GO:0017001	antibiotic catabolic process	10	1	0.93	1501	0.62528	0.62528
GO:0018243	protein O-linked glycosylation via threonine	10	1	0.93	1502	0.62528	0.62528
GO:0030322	stabilization of membrane potential	10	1	0.93	1503	0.62528	0.62528
GO:0030708	germarium-derived female germ-line cyst encapsulation	10	1	0.93	1504	0.62528	0.62528
GO:0030723	ovarian fusome organization	10	1	0.93	1505	0.62528	0.62528
GO:0040020	regulation of meiotic nuclear division	10	1	0.93	1506	0.62528	0.62528
GO:0042246	tissue regeneration	10	1	0.93	1507	0.62528	0.62528
GO:0043113	receptor clustering	10	1	0.93	1508	0.62528	0.62528
GO:0045742	positive regulation of epidermal growth factor receptor signaling pathway	10	1	0.93	1509	0.62528	0.62528
GO:0048082	regulation of adult chitin-containing cuticle pigmentation	10	1	0.93	1510	0.62528	0.62528
GO:0048747	muscle fiber development	10	1	0.93	1511	0.62528	0.62528
GO:0050775	positive regulation of dendrite morphogenesis	10	1	0.93	1512	0.62528	0.62528
GO:0061723	glycophagy	10	1	0.93	1513	0.62528	0.62528
GO:0071230	cellular response to amino acid stimulus	10	1	0.93	1514	0.62528	0.62528
GO:1905881	positive regulation of oogenesis	10	1	0.93	1515	0.62528	0.62528
GO:2000737	negative regulation of stem cell differentiation	10	1	0.93	1516	0.62528	0.62528
GO:0001934	positive regulation of protein phosphorylation	132	11	12.33	1715	0.70024	0.62609
GO:0009620	response to fungus	49	3	4.58	2049	0.84931	0.62622
GO:0045860	positive regulation of protein kinase activity	54	3	5.05	2150	0.89192	0.62649
GO:0030031	cell projection assembly	101	5	9.44	2403	0.96563	0.62786
GO:0000910	cytokinesis	94	4	8.78	2471	0.98039	0.62806
GO:0006260	DNA replication	99	3	9.25	2609	0.99636	0.6289
GO:0050803	regulation of synapse structure or activity	145	7	13.55	2512	0.98583	0.62909
GO:0070374	positive regulation of ERK1 and ERK2 cascade	46	4	4.3	1549	0.63472	0.63472
GO:0032504	multicellular organism reproduction	898	90	83.91	714	0.24465	0.63805
GO:0006796	phosphate-containing compound metabolic process	815	53	76.15	2669	0.99918	0.63984
GO:0044249	cellular biosynthetic process	1954	163	182.58	2410	0.96696	0.64027
GO:0007423	sensory organ development	383	40	35.79	717	0.24767	0.64359
GO:0001752	compound eye photoreceptor fate commitment	45	6	4.2	707	0.24048	0.64576
GO:0033227	dsRNA transport	23	2	2.15	1558	0.64737	0.64737
GO:0051302	regulation of cell division	23	2	2.15	1559	0.64737	0.64737
GO:0046777	protein autophosphorylation	37	3	3.46	1657	0.68529	0.64763
GO:0009267	cellular response to starvation	59	5	5.51	1579	0.65698	0.65698
GO:0007517	muscle organ development	76	11	7.1	428	0.09416	0.6581
GO:0000460	maturation of 5.8S rRNA	24	4	2.24	616	0.18099	0.65933
GO:0098656	anion transmembrane transport	70	8	6.54	823	0.32927	0.6595
GO:0016055	Wnt signaling pathway	97	10	9.06	1013	0.42123	0.6598
GO:0051054	positive regulation of DNA metabolic process	20	2	1.87	1395	0.56993	0.66026
GO:0006959	humoral immune response	85	8	7.94	1378	0.54621	0.6603
GO:0006760	folic acid-containing compound metabolic process	11	1	1.03	1582	0.66035	0.66035
GO:0006964	positive regulation of biosynthetic process of antibacterial peptides active against Gram-negative b...	11	1	1.03	1583	0.66035	0.66035
GO:0007110	meiosis I cytokinesis	11	1	1.03	1584	0.66035	0.66035
GO:0007200	phospholipase C-activating G-protein coupled receptor signaling pathway	11	1	1.03	1585	0.66035	0.66035
GO:0007394	dorsal closure, elongation of leading edge cells	11	1	1.03	1586	0.66035	0.66035
GO:0007428	primary branching, open tracheal system	11	1	1.03	1587	0.66035	0.66035
GO:0007584	response to nutrient	11	1	1.03	1588	0.66035	0.66035
GO:0010043	response to zinc ion	11	1	1.03	1589	0.66035	0.66035
GO:0015701	bicarbonate transport	11	1	1.03	1590	0.66035	0.66035
GO:0016973	poly(A)+ mRNA export from nucleus	11	1	1.03	1591	0.66035	0.66035
GO:0030837	negative regulation of actin filament polymerization	11	1	1.03	1592	0.66035	0.66035
GO:0031440	regulation of mRNA 3'-end processing	11	1	1.03	1593	0.66035	0.66035
GO:0033619	membrane protein proteolysis	11	1	1.03	1594	0.66035	0.66035
GO:0035290	trunk segmentation	11	1	1.03	1595	0.66035	0.66035
GO:0035332	positive regulation of hippo signaling	11	1	1.03	1596	0.66035	0.66035
GO:0042417	dopamine metabolic process	11	1	1.03	1597	0.66035	0.66035
GO:0042559	pteridine-containing compound biosynthetic process	11	1	1.03	1598	0.66035	0.66035
GO:0046426	negative regulation of JAK-STAT cascade	11	1	1.03	1599	0.66035	0.66035
GO:0046514	ceramide catabolic process	11	1	1.03	1600	0.66035	0.66035
GO:0060025	regulation of synaptic activity	11	1	1.03	1601	0.66035	0.66035
GO:0060964	regulation of gene silencing by miRNA	11	1	1.03	1602	0.66035	0.66035
GO:0061343	cell adhesion involved in heart morphogenesis	11	1	1.03	1603	0.66035	0.66035
GO:0090303	positive regulation of wound healing	11	1	1.03	1604	0.66035	0.66035
GO:0097501	stress response to metal ion	11	1	1.03	1605	0.66035	0.66035
GO:2000765	regulation of cytoplasmic translation	11	1	1.03	1606	0.66035	0.66035
GO:0016051	carbohydrate biosynthetic process	47	4	4.39	1576	0.65181	0.66055
GO:0010389	regulation of G2/M transition of mitotic cell cycle	28	2	2.62	1841	0.75133	0.66068
GO:0006605	protein targeting	84	7	7.85	1652	0.68069	0.66082
GO:0032870	cellular response to hormone stimulus	84	7	7.85	1653	0.68069	0.66082
GO:0006807	nitrogen compound metabolic process	3667	310	342.64	2602	0.99617	0.66105
GO:0007315	pole plasm assembly	61	4	5.7	2026	0.83454	0.6613
GO:0031098	stress-activated protein kinase signaling cascade	79	5	7.38	2107	0.87294	0.66169
GO:0006816	calcium ion transport	48	2	4.48	2306	0.94691	0.66174
GO:0006955	immune response	246	20	22.99	1903	0.77805	0.66208
GO:0016571	histone methylation	61	2	5.7	2483	0.98197	0.66243
GO:0098655	cation transmembrane transport	138	6	12.89	2553	0.99158	0.66428
GO:0048149	behavioral response to ethanol	48	4	4.48	1632	0.66836	0.66836
GO:0007298	border follicle cell migration	106	9	9.9	1635	0.66869	0.66869
GO:0000723	telomere maintenance	29	3	2.71	1272	0.51758	0.67017
GO:0046329	negative regulation of JNK cascade	24	2	2.24	1638	0.67061	0.67061
GO:0071456	cellular response to hypoxia	24	2	2.24	1639	0.67061	0.67061
GO:0050877	nervous system process	365	28	34.1	2143	0.89095	0.67563
GO:0034613	cellular protein localization	440	25	41.11	2644	0.99856	0.68417
GO:0019233	sensory perception of pain	61	5	5.7	1661	0.68607	0.68607
GO:0072002	Malpighian tubule development	52	11	4.86	170	0.00751	0.68859
GO:0006869	lipid transport	58	8	5.42	606	0.17023	0.69023
GO:0010035	response to inorganic substance	45	7	4.2	511	0.12211	0.69049
GO:0090305	nucleic acid phosphodiester bond hydrolysis	69	8	6.45	810	0.3149	0.69119
GO:1901607	alpha-amino acid biosynthetic process	37	5	3.46	732	0.26089	0.6912
GO:1903532	positive regulation of secretion by cell	23	3	2.15	854	0.36544	0.69159
GO:0051050	positive regulation of transport	88	9	8.22	1022	0.44004	0.69162
GO:0048639	positive regulation of developmental growth	70	7	6.54	1153	0.48436	0.6918
GO:0019722	calcium-mediated signaling	17	2	1.59	1142	0.48088	0.69183
GO:0006623	protein targeting to vacuole	12	1	1.12	1664	0.69213	0.69213
GO:0006835	dicarboxylic acid transport	12	1	1.12	1665	0.69213	0.69213
GO:0006998	nuclear envelope organization	12	1	1.12	1666	0.69213	0.69213
GO:0007032	endosome organization	12	1	1.12	1667	0.69213	0.69213
GO:0007035	vacuolar acidification	12	1	1.12	1668	0.69213	0.69213
GO:0008069	dorsal/ventral axis specification, ovarian follicular epithelium	12	1	1.12	1669	0.69213	0.69213
GO:0009047	dosage compensation by hyperactivation of X chromosome	12	1	1.12	1670	0.69213	0.69213
GO:0009065	glutamine family amino acid catabolic process	12	1	1.12	1671	0.69213	0.69213
GO:0018023	peptidyl-lysine trimethylation	12	1	1.12	1672	0.69213	0.69213
GO:0018107	peptidyl-threonine phosphorylation	12	1	1.12	1673	0.69213	0.69213
GO:0035725	sodium ion transmembrane transport	12	1	1.12	1674	0.69213	0.69213
GO:0043001	Golgi to plasma membrane protein transport	12	1	1.12	1675	0.69213	0.69213
GO:0045175	basal protein localization	12	1	1.12	1676	0.69213	0.69213
GO:0046835	carbohydrate phosphorylation	12	1	1.12	1677	0.69213	0.69213
GO:0050962	detection of light stimulus involved in sensory perception	12	1	1.12	1678	0.69213	0.69213
GO:0050975	sensory perception of touch	12	1	1.12	1679	0.69213	0.69213
GO:0062013	positive regulation of small molecule metabolic process	12	1	1.12	1680	0.69213	0.69213
GO:1905515	non-motile cilium assembly	12	1	1.12	1681	0.69213	0.69213
GO:0006936	muscle contraction	23	2	2.15	1560	0.64737	0.69215
GO:0007317	regulation of pole plasm oskar mRNA localization	25	2	2.34	1696	0.69259	0.69259
GO:0045887	positive regulation of synaptic growth at neuromuscular junction	25	2	2.34	1697	0.69259	0.69259
GO:0007297	ovarian follicle cell migration	118	10	11.03	1647	0.67484	0.69265
GO:1901606	alpha-amino acid catabolic process	37	3	3.46	1658	0.68529	0.69269
GO:0051241	negative regulation of multicellular organismal process	159	13	14.86	1791	0.73501	0.69384
GO:0007018	microtubule-based movement	88	6	8.22	2039	0.84302	0.69412
GO:0010468	regulation of gene expression	1188	82	111	2683	0.99955	0.69777
GO:0043065	positive regulation of apoptotic process	50	4	4.67	1710	0.6998	0.6998
GO:0048468	cell development	1169	128	109.23	265	0.0241	0.70837
GO:0006378	mRNA polyadenylation	26	2	2.43	1727	0.71334	0.71334
GO:0030010	establishment of cell polarity	48	4	4.48	1633	0.66836	0.71339
GO:0009306	protein secretion	66	8	6.17	737	0.27265	0.71729
GO:0035214	eye-antennal disc development	51	11	4.77	152	0.00645	0.71737
GO:0008033	tRNA processing	71	12	6.63	284	0.03038	0.71784
GO:0045892	negative regulation of transcription, DNA-templated	277	22	25.88	1989	0.82095	0.7183
GO:0000245	spliceosomal complex assembly	21	3	1.96	804	0.3123	0.72026
GO:0045610	regulation of hemocyte differentiation	23	3	2.15	855	0.36544	0.72036
GO:0006469	negative regulation of protein kinase activity	25	3	2.34	1008	0.41785	0.72046
GO:0007189	adenylate cyclase-activating G-protein coupled receptor signaling pathway	18	2	1.68	1252	0.51181	0.72065
GO:0002237	response to molecule of bacterial origin	13	1	1.21	1741	0.72094	0.72094
GO:0006536	glutamate metabolic process	13	1	1.21	1742	0.72094	0.72094
GO:0030308	negative regulation of cell growth	13	1	1.21	1743	0.72094	0.72094
GO:0030720	oocyte localization involved in germarium-derived egg chamber formation	13	1	1.21	1744	0.72094	0.72094
GO:0031145	anaphase-promoting complex-dependent catabolic process	13	1	1.21	1745	0.72094	0.72094
GO:0031644	regulation of neurological system process	13	1	1.21	1746	0.72094	0.72094
GO:0045773	positive regulation of axon extension	13	1	1.21	1747	0.72094	0.72094
GO:0046427	positive regulation of JAK-STAT cascade	13	1	1.21	1748	0.72094	0.72094
GO:0046627	negative regulation of insulin receptor signaling pathway	13	1	1.21	1749	0.72094	0.72094
GO:0055092	sterol homeostasis	13	1	1.21	1750	0.72094	0.72094
GO:0043401	steroid hormone mediated signaling pathway	27	2	2.52	1779	0.73291	0.72111
GO:0010004	gastrulation involving germ band extension	29	2	2.71	1871	0.76864	0.72122
GO:0010948	negative regulation of cell cycle process	60	3	5.61	2243	0.92859	0.72226
GO:0044242	cellular lipid catabolic process	73	4	6.82	2225	0.91989	0.72238
GO:0043252	sodium-independent organic anion transport	27	2	2.52	1780	0.73291	0.73291
GO:0030307	positive regulation of cell growth	40	3	3.74	1792	0.73574	0.73308
GO:0008593	regulation of Notch signaling pathway	95	8	8.88	1646	0.67405	0.73319
GO:0046907	intracellular transport	553	25	51.67	2763	1	0.73625
GO:0007591	molting cycle, chitin-based cuticle	81	14	7.57	243	0.01695	0.7434
GO:0007631	feeding behavior	33	6	3.08	420	0.08197	0.74533
GO:0007163	establishment or maintenance of cell polarity	185	19	17.29	859	0.36684	0.74596
GO:0001933	negative regulation of protein phosphorylation	62	6	5.79	1282	0.52754	0.74679
GO:0015718	monocarboxylic acid transport	22	2	2.06	1484	0.62286	0.74693
GO:0008594	photoreceptor cell morphogenesis	14	1	1.31	1807	0.74706	0.74706
GO:0016059	deactivation of rhodopsin mediated signaling	14	1	1.31	1808	0.74706	0.74706
GO:0016081	synaptic vesicle docking	14	1	1.31	1809	0.74706	0.74706
GO:0030422	production of siRNA involved in RNA interference	14	1	1.31	1810	0.74706	0.74706
GO:0030518	intracellular steroid hormone receptor signaling pathway	14	1	1.31	1811	0.74706	0.74706
GO:0038083	peptidyl-tyrosine autophosphorylation	14	1	1.31	1812	0.74706	0.74706
GO:0044804	autophagy of nucleus	14	1	1.31	1813	0.74706	0.74706
GO:0050878	regulation of body fluid levels	14	1	1.31	1814	0.74706	0.74706
GO:2000134	negative regulation of G1/S transition of mitotic cell cycle	14	1	1.31	1815	0.74706	0.74706
GO:0022603	regulation of anatomical structure morphogenesis	198	17	18.5	1656	0.68107	0.74773
GO:0007254	JNK cascade	65	4	6.07	2088	0.86906	0.74802
GO:0035206	regulation of hemocyte proliferation	34	4	3.18	981	0.39419	0.75024
GO:0016579	protein deubiquitination	41	3	3.83	1832	0.75107	0.75107
GO:0006414	translational elongation	28	2	2.62	1842	0.75133	0.75133
GO:0090263	positive regulation of canonical Wnt signaling pathway	28	2	2.62	1843	0.75133	0.75133
GO:0055088	lipid homeostasis	63	4	5.89	2059	0.85265	0.75229
GO:0008344	adult locomotory behavior	64	6	5.98	1383	0.55955	0.755
GO:0006996	organelle organization	1453	70	135.76	2789	1	0.76265
GO:0042742	defense response to bacterium	149	14	13.92	1286	0.53309	0.76807
GO:0016321	female meiosis chromosome segregation	29	2	2.71	1872	0.76864	0.76864
GO:0032147	activation of protein kinase activity	29	2	2.71	1873	0.76864	0.76864
GO:0006486	protein glycosylation	80	8	7.47	1132	0.47541	0.77026
GO:0006282	regulation of DNA repair	15	1	1.4	1886	0.77074	0.77074
GO:0006730	one-carbon metabolic process	15	1	1.4	1887	0.77074	0.77074
GO:0007303	cytoplasmic transport, nurse cell to oocyte	15	1	1.4	1888	0.77074	0.77074
GO:0016063	rhodopsin biosynthetic process	15	1	1.4	1889	0.77074	0.77074
GO:0051091	positive regulation of DNA binding transcription factor activity	15	1	1.4	1890	0.77074	0.77074
GO:0060857	establishment of glial blood-brain barrier	15	1	1.4	1891	0.77074	0.77074
GO:0006814	sodium ion transport	27	2	2.52	1781	0.73291	0.77081
GO:0018108	peptidyl-tyrosine phosphorylation	29	2	2.71	1874	0.76864	0.7709
GO:0048813	dendrite morphogenesis	131	17	12.24	480	0.10202	0.783
GO:0042593	glucose homeostasis	30	2	2.8	1910	0.7849	0.7849
GO:0007528	neuromuscular junction development	150	7	14.02	2536	0.98959	0.78938
GO:0030097	hemopoiesis	72	8	6.73	852	0.35832	0.79131
GO:0003014	renal system process	22	2	2.06	1485	0.62286	0.79199
GO:0000132	establishment of mitotic spindle orientation	16	1	1.49	1919	0.79221	0.79221
GO:0002218	activation of innate immune response	16	1	1.49	1920	0.79221	0.79221
GO:0007370	ventral furrow formation	16	1	1.49	1921	0.79221	0.79221
GO:0009072	aromatic amino acid family metabolic process	16	1	1.49	1922	0.79221	0.79221
GO:0045196	establishment or maintenance of neuroblast polarity	16	1	1.49	1923	0.79221	0.79221
GO:0090175	regulation of establishment of planar polarity	16	1	1.49	1924	0.79221	0.79221
GO:0016246	RNA interference	30	2	2.8	1911	0.7849	0.79236
GO:0051453	regulation of intracellular pH	32	2	2.99	1975	0.81442	0.79246
GO:0008298	intracellular mRNA localization	77	4	7.19	2272	0.93798	0.79358
GO:0006397	mRNA processing	278	12	25.98	2686	0.99958	0.79914
GO:0022416	chaeta development	60	5	5.61	1645	0.67174	0.79994
GO:0007097	nuclear migration	31	2	2.9	1937	0.80014	0.80014
GO:0045727	positive regulation of translation	31	2	2.9	1938	0.80014	0.80014
GO:0007424	open tracheal system development	200	34	18.69	54	0.00039	0.80299
GO:0007399	nervous system development	904	95	84.47	495	0.11138	0.80558
GO:0007173	epidermal growth factor receptor signaling pathway	63	7	5.89	864	0.37428	0.81084
GO:0000079	regulation of cyclin-dependent protein serine/threonine kinase activity	17	1	1.59	1954	0.81167	0.81167
GO:0007041	lysosomal transport	17	1	1.59	1955	0.81167	0.81167
GO:0009312	oligosaccharide biosynthetic process	17	1	1.59	1956	0.81167	0.81167
GO:0035019	somatic stem cell population maintenance	17	1	1.59	1957	0.81167	0.81167
GO:0043248	proteasome assembly	17	1	1.59	1958	0.81167	0.81167
GO:0043277	apoptotic cell clearance	17	1	1.59	1959	0.81167	0.81167
GO:1904263	positive regulation of TORC1 signaling	17	1	1.59	1960	0.81167	0.81167
GO:0097190	apoptotic signaling pathway	40	3	3.74	1793	0.73574	0.81174
GO:0045471	response to ethanol	65	5	6.07	1801	0.73911	0.81191
GO:0032386	regulation of intracellular transport	47	2	4.39	2289	0.94242	0.81254
GO:0045214	sarcomere organization	32	2	2.99	1976	0.81442	0.81442
GO:0007281	germ cell development	621	69	58.02	372	0.06794	0.82333
GO:0006888	ER to Golgi vesicle-mediated transport	60	4	5.61	1993	0.8248	0.8248
GO:1901136	carbohydrate derivative catabolic process	62	12	5.79	199	0.01106	0.82606
GO:0006909	phagocytosis	50	3	4.67	2064	0.85886	0.82816
GO:0019730	antimicrobial humoral response	73	7	6.82	1283	0.53004	0.8289
GO:0006383	transcription by RNA polymerase III	18	1	1.68	2008	0.82931	0.82931
GO:0007031	peroxisome organization	18	1	1.68	2009	0.82931	0.82931
GO:0007475	apposition of dorsal and ventral imaginal disc-derived wing surfaces	18	1	1.68	2010	0.82931	0.82931
GO:0030433	ubiquitin-dependent ERAD pathway	18	1	1.68	2011	0.82931	0.82931
GO:0031507	heterochromatin assembly	18	1	1.68	2012	0.82931	0.82931
GO:0031937	positive regulation of chromatin silencing	18	1	1.68	2013	0.82931	0.82931
GO:0044719	regulation of imaginal disc-derived wing size	18	1	1.68	2014	0.82931	0.82931
GO:0048678	response to axon injury	18	1	1.68	2015	0.82931	0.82931
GO:0006006	glucose metabolic process	29	2	2.71	1875	0.76864	0.82932
GO:0006612	protein targeting to membrane	29	2	2.71	1876	0.76864	0.82932
GO:0097164	ammonium ion metabolic process	29	2	2.71	1877	0.76864	0.82932
GO:0031647	regulation of protein stability	48	2	4.48	2307	0.94691	0.83015
GO:0030162	regulation of proteolysis	105	5	9.81	2430	0.97339	0.8312
GO:0007166	cell surface receptor signaling pathway	565	62	52.79	442	0.09689	0.8337
GO:0030261	chromosome condensation	48	3	4.48	2029	0.83921	0.83921
GO:0006997	nucleus organization	54	4	5.05	1856	0.75612	0.84019
GO:0008152	metabolic process	4473	399	417.95	2296	0.9454	0.84088
GO:0048193	Golgi vesicle transport	118	8	11.03	2093	0.87289	0.84143
GO:0006979	response to oxidative stress	103	9	9.62	1546	0.63437	0.84283
GO:0031328	positive regulation of cellular biosynthetic process	385	37	35.97	1110	0.45368	0.84447
GO:0000387	spliceosomal snRNP assembly	19	1	1.78	2042	0.84529	0.84529
GO:0043523	regulation of neuron apoptotic process	19	1	1.78	2043	0.84529	0.84529
GO:1903829	positive regulation of cellular protein localization	19	1	1.78	2044	0.84529	0.84529
GO:0007088	regulation of mitotic nuclear division	61	4	5.7	2027	0.83454	0.84571
GO:0006396	RNA processing	524	46	48.96	1716	0.70063	0.84636
GO:0019991	septate junction assembly	35	2	3.27	2053	0.85193	0.85193
GO:0045747	positive regulation of Notch signaling pathway	35	2	3.27	2054	0.85193	0.85193
GO:0009152	purine ribonucleotide biosynthetic process	73	4	6.82	2226	0.91989	0.85286
GO:0007030	Golgi organization	77	5	7.19	2062	0.85832	0.85832
GO:0030100	regulation of endocytosis	52	5	4.86	1302	0.54252	0.85936
GO:0043901	negative regulation of multi-organism process	26	2	2.43	1728	0.71334	0.8596
GO:0007131	reciprocal meiotic recombination	27	2	2.52	1782	0.73291	0.85964
GO:0000915	actomyosin contractile ring assembly	20	1	1.87	2069	0.85979	0.85979
GO:0045879	negative regulation of smoothened signaling pathway	20	1	1.87	2070	0.85979	0.85979
GO:0007269	neurotransmitter secretion	80	4	7.47	2326	0.94903	0.8609
GO:0034332	adherens junction organization	36	2	3.36	2076	0.86281	0.86281
GO:2000647	negative regulation of stem cell proliferation	36	2	3.36	2077	0.86281	0.86281
GO:0017144	drug metabolic process	275	24	25.7	1644	0.67092	0.86303
GO:0007346	regulation of mitotic cell cycle	172	10	16.07	2408	0.96651	0.86555
GO:0007616	long-term memory	65	4	6.07	2089	0.86906	0.86906
GO:0006325	chromatin organization	327	7	30.55	2781	1	0.86952
GO:0006950	response to stress	956	66	89.33	2639	0.99834	0.87038
GO:0051604	protein maturation	80	12	7.47	357	0.06678	0.87067
GO:0043066	negative regulation of apoptotic process	89	7	8.32	1799	0.73803	0.87206
GO:0045197	establishment or maintenance of epithelial cell apical/basal polarity	27	2	2.52	1783	0.73291	0.87275
GO:0031532	actin cytoskeleton reorganization	28	2	2.62	1844	0.75133	0.87278
GO:0008285	negative regulation of cell proliferation	79	6	7.38	1860	0.76006	0.87292
GO:0010507	negative regulation of autophagy	21	1	1.96	2094	0.87292	0.87292
GO:0044106	cellular amine metabolic process	21	1	1.96	2095	0.87292	0.87292
GO:0046330	positive regulation of JNK cascade	21	1	1.96	2096	0.87292	0.87292
GO:0046928	regulation of neurotransmitter secretion	21	1	1.96	2097	0.87292	0.87292
GO:0045451	pole plasm oskar mRNA localization	46	3	4.3	1986	0.81725	0.87306
GO:0046620	regulation of organ growth	48	2	4.48	2308	0.94691	0.87354
GO:0042752	regulation of circadian rhythm	62	3	5.79	2273	0.93801	0.87367
GO:0008360	regulation of cell shape	61	5	5.7	1662	0.68607	0.88196
GO:0008355	olfactory learning	38	2	3.55	2118	0.8824	0.8824
GO:0031146	SCF-dependent proteasomal ubiquitin-dependent protein catabolic process	38	2	3.55	2119	0.8824	0.8824
GO:0007632	visual behavior	22	1	2.06	2130	0.88483	0.88483
GO:0010951	negative regulation of endopeptidase activity	22	1	2.06	2131	0.88483	0.88483
GO:0001666	response to hypoxia	46	3	4.3	1987	0.81725	0.88493
GO:0050768	negative regulation of neurogenesis	58	5	5.42	1554	0.6418	0.89058
GO:0030509	BMP signaling pathway	39	2	3.64	2144	0.8912	0.8912
GO:0050832	defense response to fungus	39	2	3.64	2145	0.8912	0.8912
GO:0045893	positive regulation of transcription, DNA-templated	313	31	29.25	976	0.39284	0.89503
GO:0008345	larval locomotory behavior	23	1	2.15	2158	0.89563	0.89563
GO:0035096	larval midgut cell programmed cell death	23	1	2.15	2159	0.89563	0.89563
GO:0045187	regulation of circadian sleep/wake cycle, sleep	23	1	2.15	2160	0.89563	0.89563
GO:0051646	mitochondrion localization	23	1	2.15	2161	0.89563	0.89563
GO:0070328	triglyceride homeostasis	23	1	2.15	2162	0.89563	0.89563
GO:0050829	defense response to Gram-negative bacterium	82	5	7.66	2153	0.89247	0.89735
GO:0006749	glutathione metabolic process	40	2	3.74	2174	0.89938	0.89938
GO:0018105	peptidyl-serine phosphorylation	40	2	3.74	2175	0.89938	0.89938
GO:0045087	innate immune response	164	10	15.32	2334	0.95027	0.90024
GO:0007526	larval somatic muscle development	24	1	2.24	2181	0.90541	0.90541
GO:0072384	organelle transport along microtubule	24	1	2.24	2182	0.90541	0.90541
GO:0030866	cortical actin cytoskeleton organization	51	2	4.77	2366	0.95845	0.90593
GO:0044271	cellular nitrogen compound biosynthetic process	1531	118	143.05	2584	0.99492	0.90613
GO:0008049	male courtship behavior	41	2	3.83	2191	0.90699	0.90699
GO:0045886	negative regulation of synaptic growth at neuromuscular junction	41	2	3.83	2192	0.90699	0.90699
GO:0048190	wing disc dorsal/ventral pattern formation	41	2	3.83	2193	0.90699	0.90699
GO:0043547	positive regulation of GTPase activity	57	3	5.33	2200	0.91198	0.91198
GO:0006635	fatty acid beta-oxidation	32	2	2.99	1977	0.81442	0.91416
GO:0045824	negative regulation of innate immune response	25	1	2.34	2208	0.91428	0.91428
GO:0009416	response to light stimulus	127	8	11.87	2219	0.91705	0.91491
GO:0007610	behavior	423	32	39.52	2224	0.91964	0.9164
GO:0030154	cell differentiation	1361	140	127.17	481	0.10235	0.91688
GO:0031325	positive regulation of cellular metabolic process	609	48	56.9	2218	0.91675	0.91694
GO:0015711	organic anion transport	127	11	11.87	1573	0.65026	0.92214
GO:0035071	salivary gland cell autophagic cell death	26	1	2.43	2230	0.92231	0.92231
GO:0040008	regulation of growth	261	22	24.39	1777	0.72854	0.92263
GO:0006302	double-strand break repair	69	3	6.45	2381	0.96266	0.92293
GO:0042391	regulation of membrane potential	78	5	7.29	2083	0.8658	0.9233
GO:0045475	locomotor rhythm	59	3	5.51	2235	0.9234	0.9234
GO:0009314	response to radiation	168	9	15.7	2466	0.98006	0.92395
GO:0035556	intracellular signal transduction	572	34	53.45	2670	0.99918	0.92515
GO:0044087	regulation of cellular component biogenesis	269	10	25.13	2737	0.99991	0.92655
GO:0008361	regulation of cell size	86	6	8.04	1997	0.82691	0.92833
GO:0016192	vesicle-mediated transport	465	23	43.45	2736	0.9999	0.92835
GO:0000422	autophagy of mitochondrion	27	1	2.52	2246	0.9296	0.9296
GO:0034605	cellular response to heat	27	1	2.52	2247	0.9296	0.9296
GO:0045570	regulation of imaginal disc growth	27	1	2.52	2248	0.9296	0.9296
GO:0009266	response to temperature stimulus	105	5	9.81	2431	0.97339	0.93055
GO:0006511	ubiquitin-dependent protein catabolic process	203	7	18.97	2711	0.99971	0.93056
GO:0051124	synaptic growth at neuromuscular junction	118	5	11.03	2531	0.98879	0.9309
GO:0042594	response to starvation	109	8	10.18	1952	0.81117	0.93234
GO:0009636	response to toxic substance	122	11	11.4	1461	0.59608	0.93587
GO:1901566	organonitrogen compound biosynthetic process	820	76	76.62	1381	0.55144	0.93594
GO:0071805	potassium ion transmembrane transport	40	3	3.74	1794	0.73574	0.93596
GO:0000462	maturation of SSU-rRNA from tricistronic rRNA transcript (SSU-rRNA, 5.8S rRNA, LSU-rRNA)	33	2	3.08	1999	0.82778	0.93606
GO:0007112	male meiosis cytokinesis	28	1	2.62	2264	0.9362	0.9362
GO:0045454	cell redox homeostasis	28	1	2.62	2265	0.9362	0.9362
GO:0008284	positive regulation of cell proliferation	58	6	5.42	1119	0.46095	0.93655
GO:0033993	response to lipid	64	3	5.98	2300	0.94628	0.93657
GO:1901701	cellular response to oxygen-containing compound	99	10	9.25	1090	0.44723	0.94155
GO:0000724	double-strand break repair via homologous recombination	38	2	3.55	2120	0.8824	0.94215
GO:0006626	protein targeting to mitochondrion	29	1	2.71	2284	0.94219	0.94219
GO:0007349	cellularization	81	3	7.57	2506	0.9849	0.94315
GO:0009967	positive regulation of signal transduction	292	20	27.28	2330	0.94999	0.94365
GO:0080090	regulation of primary metabolic process	1461	89	136.51	2774	1	0.94442
GO:0006457	protein folding	112	5	10.46	2493	0.9832	0.94721
GO:0000212	meiotic spindle organization	30	1	2.8	2313	0.94761	0.94761
GO:0006368	transcription elongation from RNA polymerase II promoter	30	1	2.8	2314	0.94761	0.94761
GO:0033108	mitochondrial respiratory chain complex assembly	30	1	2.8	2315	0.94761	0.94761
GO:0035023	regulation of Rho protein signal transduction	30	1	2.8	2316	0.94761	0.94761
GO:0050821	protein stabilization	30	1	2.8	2317	0.94761	0.94761
GO:0014070	response to organic cyclic compound	103	7	9.62	2068	0.85891	0.94781
GO:0006099	tricarboxylic acid cycle	31	1	2.9	2341	0.95252	0.95252
GO:0007218	neuropeptide signaling pathway	31	1	2.9	2342	0.95252	0.95252
GO:0051489	regulation of filopodium assembly	31	1	2.9	2343	0.95252	0.95252
GO:0007613	memory	97	5	9.06	2354	0.95582	0.95742
GO:0008104	protein localization	570	35	53.26	2640	0.99844	0.96052
GO:0000045	autophagosome assembly	33	1	3.08	2370	0.96102	0.96102
GO:0006906	vesicle fusion	60	3	5.61	2244	0.92859	0.96168
GO:0006355	regulation of transcription, DNA-templated	872	60	81.48	2623	0.9976	0.96197
GO:0050808	synapse organization	233	12	21.77	2578	0.99417	0.96254
GO:0031329	regulation of cellular catabolic process	148	3	13.83	2745	0.99994	0.96371
GO:0000077	DNA damage checkpoint	34	1	3.18	2389	0.96468	0.96468
GO:0007291	sperm individualization	34	1	3.18	2390	0.96468	0.96468
GO:0030716	oocyte fate determination	34	1	3.18	2391	0.96468	0.96468
GO:0030838	positive regulation of actin filament polymerization	34	1	3.18	2392	0.96468	0.96468
GO:0000278	mitotic cell cycle	419	15	39.15	2771	1	0.96599
GO:0007268	chemical synaptic transmission	234	9	21.86	2701	0.99966	0.9671
GO:0007310	oocyte dorsal/ventral axis specification	40	4	3.74	1279	0.52154	0.96756
GO:0000281	mitotic cytokinesis	54	2	5.05	2411	0.96757	0.96757
GO:0071902	positive regulation of protein serine/threonine kinase activity	35	1	3.27	2415	0.96799	0.96799
GO:0017148	negative regulation of translation	73	4	6.82	2227	0.91989	0.96809
GO:0000226	microtubule cytoskeleton organization	263	11	24.57	2691	0.9996	0.9699
GO:0042052	rhabdomere development	36	1	3.36	2419	0.971	0.971
GO:0051259	protein complex oligomerization	36	1	3.36	2420	0.971	0.971
GO:0008356	asymmetric cell division	94	5	8.78	2305	0.94686	0.97122
GO:0006417	regulation of translation	144	8	13.45	2402	0.9656	0.97149
GO:0009968	negative regulation of signal transduction	260	21	24.29	1933	0.79234	0.97257
GO:0007520	myoblast fusion	44	2	4.11	2238	0.9267	0.97367
GO:0000381	regulation of alternative mRNA splicing, via spliceosome	74	3	6.91	2437	0.97426	0.97426
GO:0046579	positive regulation of Ras protein signal transduction	57	2	5.33	2440	0.97475	0.97475
GO:0051726	regulation of cell cycle	268	14	25.04	2600	0.99593	0.975
GO:0016482	cytosolic transport	53	2	4.95	2398	0.96477	0.97624
GO:0032482	Rab protein signal transduction	39	1	3.64	2458	0.97842	0.97842
GO:0035317	imaginal disc-derived wing hair organization	39	1	3.64	2459	0.97842	0.97842
GO:0006418	tRNA aminoacylation for protein translation	40	1	3.74	2472	0.98045	0.98045
GO:0009408	response to heat	67	2	6.26	2533	0.98919	0.98063
GO:0007283	spermatogenesis	153	5	14.3	2663	0.9991	0.98184
GO:0061077	chaperone-mediated protein folding	41	1	3.83	2484	0.98229	0.98229
GO:0007525	somatic muscle development	65	2	6.07	2518	0.98717	0.98243
GO:0006839	mitochondrial transport	77	3	7.19	2465	0.97949	0.98244
GO:0048488	synaptic vesicle endocytosis	42	1	3.92	2498	0.98395	0.98395
GO:0000209	protein polyubiquitination	63	2	5.89	2502	0.98479	0.98479
GO:0097305	response to alcohol	108	6	10.09	2299	0.94618	0.98556
GO:0006470	protein dephosphorylation	84	3	7.85	2524	0.98803	0.98803
GO:0009108	coenzyme biosynthetic process	73	4	6.82	2228	0.91989	0.98803
GO:0007274	neuromuscular synaptic transmission	67	2	6.26	2534	0.98919	0.98919
GO:0006897	endocytosis	181	11	16.91	2365	0.95837	0.99038
GO:0045333	cellular respiration	96	2	8.97	2666	0.99916	0.99472
GO:0006413	translational initiation	54	1	5.05	2588	0.99509	0.99509
GO:0000398	mRNA splicing, via spliceosome	226	8	21.12	2724	0.99981	0.99612
GO:0007293	germarium-derived egg chamber formation	89	3	8.32	2555	0.99191	0.99703
GO:0051225	spindle assembly	61	1	5.7	2622	0.99755	0.99755
GO:0050804	modulation of chemical synaptic transmission	94	3	8.78	2579	0.99456	0.998
GO:0016197	endosomal transport	87	2	8.13	2633	0.99812	0.99812
GO:0007052	mitotic spindle organization	68	1	6.35	2651	0.99877	0.99877
GO:0008654	phospholipid biosynthetic process	68	1	6.35	2652	0.99877	0.99877
GO:0016567	protein ubiquitination	154	4	14.39	2722	0.9998	0.99904
GO:0006468	protein phosphorylation	370	24	34.57	2488	0.98271	0.99913
GO:0031023	microtubule organizing center organization	72	1	6.73	2668	0.99917	0.99917
GO:0006357	regulation of transcription by RNA polymerase II	530	44	49.52	1992	0.82414	0.99933
GO:0061024	membrane organization	202	7	18.87	2706	0.99969	0.99968
GO:0006338	chromatin remodeling	102	2	9.53	2681	0.99951	0.99975
GO:0006886	intracellular protein transport	310	14	28.97	2696	0.99962	0.99981
GO:0018205	peptidyl-lysine modification	133	3	12.43	2720	0.99979	0.99982
GO:0043161	proteasome-mediated ubiquitin-dependent protein catabolic process	159	5	14.86	2678	0.99943	0.99987
GO:0016570	histone modification	172	3	16.07	2759	0.99999	0.9999
GO:0032543	mitochondrial translation	102	1	9.53	2749	0.99996	0.99996
GO:0000003	reproduction	994	105	92.88	424	0.0879	1
GO:0000038	very long-chain fatty acid metabolic process	19	8	1.78	41	0.00017	1
GO:0000041	transition metal ion transport	29	2	2.71	1878	0.76864	1
GO:0000070	mitotic sister chromatid segregation	96	2	8.97	2667	0.99916	1
GO:0000075	cell cycle checkpoint	58	1	5.42	2613	0.9967	1
GO:0000076	DNA replication checkpoint	14	1	1.31	1816	0.74706	1
GO:0000082	G1/S transition of mitotic cell cycle	34	3	3.18	1541	0.62798	1
GO:0000097	sulfur amino acid biosynthetic process	10	1	0.93	1517	0.62528	1
GO:0000165	MAPK cascade	149	12	13.92	1829	0.74825	1
GO:0000270	peptidoglycan metabolic process	9	2	0.84	648	0.20268	1
GO:0000271	polysaccharide biosynthetic process	16	2	1.49	1100	0.44876	1
GO:0000272	polysaccharide catabolic process	13	1	1.21	1751	0.72094	1
GO:0000280	nuclear division	262	7	24.48	2762	1	1
GO:0000288	nuclear-transcribed mRNA catabolic process, deadenylation-dependent decay	27	2	2.52	1784	0.73291	1
GO:0000291	nuclear-transcribed mRNA catabolic process, exonucleolytic	10	4	0.93	190	0.01003	1
GO:0000375	RNA splicing, via transesterification reactions	226	8	21.12	2725	0.99981	1
GO:0000377	RNA splicing, via transesterification reactions with bulged adenosine as nucleophile	226	8	21.12	2726	0.99981	1
GO:0000380	alternative mRNA splicing, via spliceosome	74	3	6.91	2438	0.97426	1
GO:0000459	exonucleolytic trimming involved in rRNA processing	5	2	0.47	393	0.07205	1
GO:0000466	maturation of 5.8S rRNA from tricistronic rRNA transcript (SSU-rRNA, 5.8S rRNA, LSU-rRNA)	13	3	1.21	505	0.11467	1
GO:0000478	endonucleolytic cleavage involved in rRNA processing	10	1	0.93	1518	0.62528	1
GO:0000479	endonucleolytic cleavage of tricistronic rRNA transcript (SSU-rRNA, 5.8S rRNA, LSU-rRNA)	9	1	0.84	1430	0.58661	1
GO:0000578	embryonic axis specification	119	17	11.12	331	0.04991	1
GO:0000725	recombinational repair	38	2	3.55	2121	0.8824	1
GO:0000737	DNA catabolic process, endonucleolytic	11	2	1.03	749	0.27468	1
GO:0000768	syncytium formation by plasma membrane fusion	44	2	4.11	2239	0.9267	1
GO:0000819	sister chromatid segregation	109	2	10.18	2717	0.99974	1
GO:0000904	cell morphogenesis involved in differentiation	386	54	36.07	88	0.00147	1
GO:0000912	assembly of actomyosin apparatus involved in cytokinesis	20	1	1.87	2071	0.85979	1
GO:0000956	nuclear-transcribed mRNA catabolic process	54	4	5.05	1857	0.75612	1
GO:0000959	mitochondrial RNA metabolic process	21	2	1.96	1463	0.59704	1
GO:0000963	mitochondrial RNA processing	7	2	0.65	537	0.13359	1
GO:0000966	RNA 5'-end processing	8	1	0.75	1348	0.54395	1
GO:0001101	response to acid chemical	15	2	1.4	992	0.41556	1
GO:0001505	regulation of neurotransmitter levels	110	4	10.28	2575	0.99385	1
GO:0001522	pseudouridine synthesis	14	2	1.31	876	0.38137	1
GO:0001558	regulation of cell growth	68	5	6.35	1900	0.77437	1
GO:0001578	microtubule bundle formation	26	1	2.43	2231	0.92231	1
GO:0001655	urogenital system development	59	11	5.51	249	0.01918	1
GO:0001667	ameboidal-type cell migration	160	21	14.95	373	0.06863	1
GO:0001703	gastrulation with mouth forming first	29	2	2.71	1879	0.76864	1
GO:0001704	formation of primary germ layer	24	5	2.24	360	0.06709	1
GO:0001707	mesoderm formation	19	4	1.78	440	0.09472	1
GO:0001738	morphogenesis of a polarized epithelium	100	14	9.34	415	0.08067	1
GO:0001745	compound eye morphogenesis	247	23	23.08	1288	0.54016	1
GO:0001751	compound eye photoreceptor cell differentiation	140	15	13.08	819	0.3273	1
GO:0001754	eye photoreceptor cell differentiation	145	15	13.55	870	0.37874	1
GO:0001763	morphogenesis of a branching structure	50	8	4.67	426	0.0903	1
GO:0001775	cell activation	11	1	1.03	1607	0.66035	1
GO:0001895	retina homeostasis	17	3	1.59	663	0.20791	1
GO:0001932	regulation of protein phosphorylation	213	17	19.9	1918	0.78894	1
GO:0001941	postsynaptic membrane organization	13	1	1.21	1752	0.72094	1
GO:0002009	morphogenesis of an epithelium	481	66	44.94	72	0.00076	1
GO:0002064	epithelial cell development	311	50	29.06	33	8e-05	1
GO:0002066	columnar/cuboidal epithelial cell development	283	48	26.44	24	2.8e-05	1
GO:0002097	tRNA wobble base modification	13	3	1.21	506	0.11467	1
GO:0002164	larval development	130	16	12.15	561	0.15374	1
GO:0002165	instar larval or pupal development	444	51	41.49	371	0.06763	1
GO:0002225	positive regulation of antimicrobial peptide production	25	2	2.34	1698	0.69259	1
GO:0002251	organ or tissue specific immune response	13	4	1.21	273	0.02724	1
GO:0002252	immune effector process	107	5	10	2452	0.97663	1
GO:0002253	activation of immune response	17	1	1.59	1961	0.81167	1
GO:0002440	production of molecular mediator of immune response	42	3	3.92	1864	0.76568	1
GO:0002520	immune system development	82	9	7.66	848	0.35754	1
GO:0002683	negative regulation of immune system process	52	5	4.86	1303	0.54252	1
GO:0002697	regulation of immune effector process	52	3	4.86	2112	0.87637	1
GO:0002699	positive regulation of immune effector process	25	2	2.34	1699	0.69259	1
GO:0002700	regulation of production of molecular mediator of immune response	40	2	3.74	2176	0.89938	1
GO:0002702	positive regulation of production of molecular mediator of immune response	25	2	2.34	1700	0.69259	1
GO:0002759	regulation of antimicrobial humoral response	44	2	4.11	2240	0.9267	1
GO:0002760	positive regulation of antimicrobial humoral response	25	2	2.34	1701	0.69259	1
GO:0002777	antimicrobial peptide biosynthetic process	31	2	2.9	1939	0.80014	1
GO:0002778	antibacterial peptide production	18	2	1.68	1253	0.51181	1
GO:0002780	antibacterial peptide biosynthetic process	18	2	1.68	1254	0.51181	1
GO:0002784	regulation of antimicrobial peptide production	39	2	3.64	2146	0.8912	1
GO:0002786	regulation of antibacterial peptide production	18	2	1.68	1255	0.51181	1
GO:0002790	peptide secretion	72	10	6.73	518	0.13133	1
GO:0002791	regulation of peptide secretion	25	5	2.34	409	0.07771	1
GO:0002803	positive regulation of antibacterial peptide production	15	2	1.4	993	0.41556	1
GO:0002805	regulation of antimicrobial peptide biosynthetic process	31	2	2.9	1940	0.80014	1
GO:0002807	positive regulation of antimicrobial peptide biosynthetic process	21	2	1.96	1464	0.59704	1
GO:0002808	regulation of antibacterial peptide biosynthetic process	18	2	1.68	1256	0.51181	1
GO:0002812	biosynthetic process of antibacterial peptides active against Gram-negative bacteria	13	1	1.21	1753	0.72094	1
GO:0002813	regulation of biosynthetic process of antibacterial peptides active against Gram-negative bacteria	13	1	1.21	1754	0.72094	1
GO:0002831	regulation of response to biotic stimulus	64	3	5.98	2301	0.94628	1
GO:0002833	positive regulation of response to biotic stimulus	28	2	2.62	1845	0.75133	1
GO:0002920	regulation of humoral immune response	45	2	4.2	2257	0.93234	1
GO:0002922	positive regulation of humoral immune response	25	2	2.34	1702	0.69259	1
GO:0003002	regionalization	372	49	34.76	172	0.00791	1
GO:0003006	developmental process involved in reproduction	699	83	65.31	198	0.01104	1
GO:0003008	system process	450	39	42.05	1737	0.71904	1
GO:0003013	circulatory system process	38	7	3.55	344	0.05919	1
GO:0003156	regulation of animal organ formation	9	1	0.84	1431	0.58661	1
GO:0003381	epithelial cell morphogenesis involved in gastrulation	10	1	0.93	1519	0.62528	1
GO:0003382	epithelial cell morphogenesis	23	2	2.15	1561	0.64737	1
GO:0005976	polysaccharide metabolic process	35	4	3.27	1003	0.41604	1
GO:0005980	glycogen catabolic process	12	1	1.12	1682	0.69213	1
GO:0005996	monosaccharide metabolic process	49	5	4.58	1157	0.48836	1
GO:0006022	aminoglycan metabolic process	82	16	7.66	119	0.00334	1
GO:0006023	aminoglycan biosynthetic process	19	2	1.78	1296	0.54151	1
GO:0006024	glycosaminoglycan biosynthetic process	11	1	1.03	1608	0.66035	1
GO:0006026	aminoglycan catabolic process	29	8	2.71	129	0.00405	1
GO:0006027	glycosaminoglycan catabolic process	9	2	0.84	649	0.20268	1
GO:0006029	proteoglycan metabolic process	18	1	1.68	2016	0.82931	1
GO:0006040	amino sugar metabolic process	67	17	6.26	36	0.0001	1
GO:0006066	alcohol metabolic process	61	8	5.7	654	0.20647	1
GO:0006073	cellular glucan metabolic process	24	3	2.24	970	0.39179	1
GO:0006081	cellular aldehyde metabolic process	20	2	1.87	1396	0.56993	1
GO:0006082	organic acid metabolic process	334	36	31.21	636	0.20219	1
GO:0006090	pyruvate metabolic process	30	2	2.8	1912	0.7849	1
GO:0006101	citrate metabolic process	32	1	2.99	2355	0.95698	1
GO:0006112	energy reserve metabolic process	24	3	2.24	971	0.39179	1
GO:0006139	nucleobase-containing compound metabolic process	1946	133	181.83	2767	1	1
GO:0006140	regulation of nucleotide metabolic process	13	2	1.21	836	0.34636	1
GO:0006152	purine nucleoside catabolic process	9	1	0.84	1432	0.58661	1
GO:0006163	purine nucleotide metabolic process	152	4	14.2	2719	0.99977	1
GO:0006164	purine nucleotide biosynthetic process	75	4	7.01	2245	0.92946	1
GO:0006206	pyrimidine nucleobase metabolic process	13	2	1.21	837	0.34636	1
GO:0006213	pyrimidine nucleoside metabolic process	9	1	0.84	1433	0.58661	1
GO:0006220	pyrimidine nucleotide metabolic process	13	1	1.21	1755	0.72094	1
GO:0006221	pyrimidine nucleotide biosynthetic process	13	1	1.21	1756	0.72094	1
GO:0006259	DNA metabolic process	283	14	26.44	2635	0.99821	1
GO:0006261	DNA-dependent DNA replication	82	2	7.66	2616	0.99707	1
GO:0006275	regulation of DNA replication	27	2	2.52	1785	0.73291	1
GO:0006278	RNA-dependent DNA biosynthetic process	5	1	0.47	944	0.38775	1
GO:0006281	DNA repair	155	4	14.48	2727	0.99982	1
GO:0006304	DNA modification	8	1	0.75	1349	0.54395	1
GO:0006310	DNA recombination	74	3	6.91	2439	0.97426	1
GO:0006323	DNA packaging	86	3	8.04	2537	0.98976	1
GO:0006333	chromatin assembly or disassembly	47	1	4.39	2543	0.9902	1
GO:0006342	chromatin silencing	99	1	9.25	2746	0.99994	1
GO:0006351	transcription, DNA-templated	933	63	87.18	2657	0.99898	1
GO:0006354	DNA-templated transcription, elongation	34	1	3.18	2393	0.96468	1
GO:0006366	transcription by RNA polymerase II	566	45	52.89	2173	0.89839	1
GO:0006399	tRNA metabolic process	120	15	11.21	558	0.14933	1
GO:0006401	RNA catabolic process	83	4	7.76	2363	0.95824	1
GO:0006402	mRNA catabolic process	70	4	6.54	2179	0.90335	1
GO:0006405	RNA export from nucleus	61	3	5.7	2261	0.93346	1
GO:0006406	mRNA export from nucleus	33	1	3.08	2371	0.96102	1
GO:0006412	translation	396	40	37	814	0.32249	1
GO:0006464	cellular protein modification process	1011	50	94.47	2783	1	1
GO:0006479	protein methylation	69	3	6.45	2382	0.96266	1
GO:0006490	oligosaccharide-lipid intermediate biosynthetic process	12	1	1.12	1683	0.69213	1
GO:0006493	protein O-linked glycosylation	35	2	3.27	2055	0.85193	1
GO:0006497	protein lipidation	54	1	5.05	2589	0.99509	1
GO:0006518	peptide metabolic process	497	51	46.44	719	0.25487	1
GO:0006534	cysteine metabolic process	9	1	0.84	1434	0.58661	1
GO:0006555	methionine metabolic process	16	2	1.49	1101	0.44876	1
GO:0006582	melanin metabolic process	49	2	4.58	2335	0.95106	1
GO:0006611	protein export from nucleus	56	3	5.23	2190	0.9057	1
GO:0006613	cotranslational protein targeting to membrane	11	1	1.03	1609	0.66035	1
GO:0006631	fatty acid metabolic process	91	14	8.5	310	0.042	1
GO:0006637	acyl-CoA metabolic process	34	5	3.18	656	0.20741	1
GO:0006638	neutral lipid metabolic process	31	2	2.9	1941	0.80014	1
GO:0006639	acylglycerol metabolic process	31	2	2.9	1942	0.80014	1
GO:0006641	triglyceride metabolic process	28	2	2.62	1846	0.75133	1
GO:0006643	membrane lipid metabolic process	89	9	8.32	1112	0.45376	1
GO:0006650	glycerophospholipid metabolic process	81	2	7.57	2614	0.9968	1
GO:0006664	glycolipid metabolic process	50	1	4.67	2564	0.99272	1
GO:0006665	sphingolipid metabolic process	54	9	5.05	354	0.06075	1
GO:0006672	ceramide metabolic process	20	1	1.87	2072	0.85979	1
GO:0006687	glycosphingolipid metabolic process	17	1	1.59	1962	0.81167	1
GO:0006694	steroid biosynthetic process	30	6	2.8	341	0.05558	1
GO:0006714	sesquiterpenoid metabolic process	5	1	0.47	945	0.38775	1
GO:0006720	isoprenoid metabolic process	22	2	2.06	1486	0.62286	1
GO:0006721	terpenoid metabolic process	10	2	0.93	699	0.23855	1
GO:0006725	cellular aromatic compound metabolic process	2055	143	192.01	2764	1	1
GO:0006732	coenzyme metabolic process	120	14	11.21	683	0.22855	1
GO:0006733	oxidoreduction coenzyme metabolic process	45	5	4.2	989	0.413	1
GO:0006753	nucleoside phosphate metabolic process	197	10	18.41	2550	0.99122	1
GO:0006754	ATP biosynthetic process	38	2	3.55	2122	0.8824	1
GO:0006757	ATP generation from ADP	17	2	1.59	1143	0.48088	1
GO:0006793	phosphorus metabolic process	857	58	80.08	2637	0.99828	1
GO:0006810	transport	1370	98	128.01	2676	0.99938	1
GO:0006811	ion transport	377	26	35.23	2404	0.9658	1
GO:0006812	cation transport	209	10	19.53	2593	0.99561	1
GO:0006813	potassium ion transport	46	3	4.3	1988	0.81725	1
GO:0006836	neurotransmitter transport	107	5	10	2453	0.97663	1
GO:0006865	amino acid transport	39	4	3.64	1240	0.5011	1
GO:0006873	cellular ion homeostasis	106	9	9.9	1636	0.66869	1
GO:0006874	cellular calcium ion homeostasis	38	5	3.55	756	0.2794	1
GO:0006875	cellular metal ion homeostasis	69	7	6.45	1126	0.46885	1
GO:0006885	regulation of pH	33	2	3.08	2000	0.82778	1
GO:0006887	exocytosis	78	2	7.29	2599	0.99584	1
GO:0006892	post-Golgi vesicle-mediated transport	27	2	2.52	1786	0.73291	1
GO:0006893	Golgi to plasma membrane transport	14	1	1.31	1817	0.74706	1
GO:0006904	vesicle docking involved in exocytosis	25	1	2.34	2209	0.91428	1
GO:0006913	nucleocytoplasmic transport	109	4	10.18	2569	0.99337	1
GO:0006921	cellular component disassembly involved in execution phase of apoptosis	9	2	0.84	650	0.20268	1
GO:0006928	movement of cell or subcellular component	532	70	49.71	95	0.00167	1
GO:0006935	chemotaxis	233	40	21.77	35	9.9e-05	1
GO:0006949	syncytium formation	44	2	4.11	2241	0.9267	1
GO:0006974	cellular response to DNA damage stimulus	191	4	17.85	2756	0.99999	1
GO:0006986	response to unfolded protein	29	3	2.71	1273	0.51758	1
GO:0007005	mitochondrion organization	160	4	14.95	2732	0.99988	1
GO:0007006	mitochondrial membrane organization	23	1	2.15	2163	0.89563	1
GO:0007010	cytoskeleton organization	500	25	46.72	2742	0.99993	1
GO:0007019	microtubule depolymerization	17	1	1.59	1963	0.81167	1
GO:0007028	cytoplasm organization	68	4	6.35	2141	0.89072	1
GO:0007033	vacuole organization	50	2	4.67	2349	0.9549	1
GO:0007034	vacuolar transport	42	2	3.92	2203	0.91405	1
GO:0007043	cell-cell junction assembly	51	2	4.77	2367	0.95845	1
GO:0007049	cell cycle	646	24	60.36	2786	1	1
GO:0007051	spindle organization	108	2	10.09	2713	0.99972	1
GO:0007093	mitotic cell cycle checkpoint	42	1	3.92	2499	0.98395	1
GO:0007127	meiosis I	50	2	4.67	2350	0.9549	1
GO:0007140	male meiotic nuclear division	57	1	5.33	2607	0.99635	1
GO:0007143	female meiotic nuclear division	62	2	5.79	2495	0.98344	1
GO:0007154	cell communication	1452	115	135.67	2504	0.9848	1
GO:0007162	negative regulation of cell adhesion	14	2	1.31	877	0.38137	1
GO:0007164	establishment of tissue polarity	88	14	8.22	292	0.03271	1
GO:0007167	enzyme linked receptor protein signaling pathway	217	26	20.28	494	0.11045	1
GO:0007178	transmembrane receptor protein serine/threonine kinase signaling pathway	62	3	5.79	2274	0.93801	1
GO:0007187	G-protein coupled receptor signaling pathway, coupled to cyclic nucleotide second messenger	33	2	3.08	2001	0.82778	1
GO:0007188	adenylate cyclase-modulating G-protein coupled receptor signaling pathway	31	2	2.9	1943	0.80014	1
GO:0007212	dopamine receptor signaling pathway	8	1	0.75	1350	0.54395	1
GO:0007259	JAK-STAT cascade	37	2	3.46	2108	0.87295	1
GO:0007264	small GTPase mediated signal transduction	212	10	19.81	2606	0.99632	1
GO:0007265	Ras protein signal transduction	185	10	17.29	2490	0.983	1
GO:0007266	Rho protein signal transduction	51	1	4.77	2571	0.9934	1
GO:0007267	cell-cell signaling	391	27	36.53	2413	0.96772	1
GO:0007276	gamete generation	759	75	70.92	809	0.31465	1
GO:0007286	spermatid development	60	1	5.61	2619	0.99729	1
GO:0007292	female gamete generation	608	69	56.81	326	0.04713	1
GO:0007300	ovarian nurse cell to oocyte transport	29	1	2.71	2285	0.94219	1
GO:0007308	oocyte construction	121	11	11.31	1412	0.58479	1
GO:0007309	oocyte axis specification	118	11	11.03	1380	0.55015	1
GO:0007316	pole plasm RNA localization	50	3	4.67	2065	0.85886	1
GO:0007320	insemination	5	1	0.47	946	0.38775	1
GO:0007338	single fertilization	27	1	2.52	2249	0.9296	1
GO:0007351	tripartite regional subdivision	114	17	10.65	298	0.03511	1
GO:0007379	segment specification	22	1	2.06	2132	0.88483	1
GO:0007389	pattern specification process	403	52	37.66	179	0.00943	1
GO:0007392	initiation of dorsal closure	16	4	1.49	335	0.05545	1
GO:0007405	neuroblast proliferation	84	8	7.85	1284	0.53233	1
GO:0007439	ectodermal digestive tract development	8	1	0.75	1351	0.54395	1
GO:0007445	determination of imaginal disc primordium	9	3	0.84	315	0.04446	1
GO:0007447	imaginal disc pattern formation	83	11	7.76	555	0.14891	1
GO:0007448	anterior/posterior pattern specification, imaginal disc	16	4	1.49	336	0.05545	1
GO:0007449	proximal/distal pattern formation, imaginal disc	15	5	1.4	182	0.00952	1
GO:0007472	wing disc morphogenesis	226	24	21.12	758	0.2831	1
GO:0007483	genital disc morphogenesis	16	2	1.49	1102	0.44876	1
GO:0007484	imaginal disc-derived genitalia development	20	3	1.87	766	0.28575	1
GO:0007522	visceral muscle development	12	2	1.12	791	0.31072	1
GO:0007530	sex determination	24	3	2.24	972	0.39179	1
GO:0007538	primary sex determination	11	2	1.03	750	0.27468	1
GO:0007542	primary sex determination, germ-line	5	1	0.47	947	0.38775	1
GO:0007549	dosage compensation	17	1	1.59	1964	0.81167	1
GO:0007560	imaginal disc morphogenesis	312	37	29.15	401	0.07539	1
GO:0007562	eclosion	16	2	1.49	1103	0.44876	1
GO:0007564	regulation of chitin-based cuticle tanning	10	1	0.93	1520	0.62528	1
GO:0007593	chitin-based cuticle sclerotization	29	6	2.71	327	0.04811	1
GO:0007600	sensory perception	206	19	19.25	1386	0.56008	1
GO:0007603	phototransduction, visible light	25	1	2.34	2210	0.91428	1
GO:0007606	sensory perception of chemical stimulus	75	5	7.01	2038	0.84231	1
GO:0007611	learning or memory	139	6	12.99	2559	0.99211	1
GO:0007612	learning	57	2	5.33	2441	0.97475	1
GO:0007617	mating behavior	71	6	6.63	1624	0.66259	1
GO:0007618	mating	75	7	7.01	1385	0.55959	1
GO:0007619	courtship behavior	50	2	4.67	2351	0.9549	1
GO:0007620	copulation	11	1	1.03	1610	0.66035	1
GO:0007635	chemosensory behavior	64	2	5.98	2513	0.98603	1
GO:0008016	regulation of heart contraction	20	2	1.87	1397	0.56993	1
GO:0008037	cell recognition	87	19	8.13	52	0.00034	1
GO:0008052	sensory organ boundary specification	15	3	1.4	573	0.15917	1
GO:0008055	ocellus pigment biosynthetic process	15	3	1.4	574	0.15917	1
GO:0008064	regulation of actin polymerization or depolymerization	56	2	5.23	2426	0.97255	1
GO:0008078	mesodermal cell migration	15	3	1.4	575	0.15917	1
GO:0008150	biological_process	7299	682	682	2790	1	1
GO:0008154	actin polymerization or depolymerization	64	3	5.98	2302	0.94628	1
GO:0008156	negative regulation of DNA replication	13	1	1.21	1757	0.72094	1
GO:0008202	steroid metabolic process	43	7	4.02	479	0.10153	1
GO:0008205	ecdysone metabolic process	12	4	1.12	256	0.02033	1
GO:0008213	protein alkylation	69	3	6.45	2383	0.96266	1
GO:0008219	cell death	318	28	29.71	1623	0.66126	1
GO:0008272	sulfate transport	10	1	0.93	1521	0.62528	1
GO:0008277	regulation of G-protein coupled receptor protein signaling pathway	21	1	1.96	2098	0.87292	1
GO:0008299	isoprenoid biosynthetic process	16	1	1.49	1925	0.79221	1
GO:0008306	associative learning	48	2	4.48	2309	0.94691	1
GO:0008358	maternal determination of anterior/posterior axis, embryo	84	8	7.85	1285	0.53233	1
GO:0008363	larval chitin-based cuticle development	22	2	2.06	1487	0.62286	1
GO:0008380	RNA splicing	243	8	22.71	2748	0.99994	1
GO:0008582	regulation of synaptic growth at neuromuscular junction	91	4	8.5	2448	0.97581	1
GO:0008589	regulation of smoothened signaling pathway	34	1	3.18	2394	0.96468	1
GO:0008592	regulation of Toll signaling pathway	21	2	1.96	1465	0.59704	1
GO:0008610	lipid biosynthetic process	167	21	15.6	444	0.09741	1
GO:0008643	carbohydrate transport	20	4	1.87	491	0.11008	1
GO:0008652	cellular amino acid biosynthetic process	41	5	3.83	824	0.3362	1
GO:0009056	catabolic process	768	56	71.76	2511	0.98564	1
GO:0009057	macromolecule catabolic process	399	25	37.28	2548	0.99104	1
GO:0009059	macromolecule biosynthetic process	1569	117	146.6	2649	0.9987	1
GO:0009060	aerobic respiration	43	1	4.02	2509	0.98546	1
GO:0009062	fatty acid catabolic process	44	2	4.11	2242	0.9267	1
GO:0009063	cellular amino acid catabolic process	39	3	3.64	1738	0.71968	1
GO:0009064	glutamine family amino acid metabolic process	28	4	2.62	735	0.26292	1
GO:0009066	aspartate family amino acid metabolic process	28	2	2.62	1847	0.75133	1
GO:0009067	aspartate family amino acid biosynthetic process	13	1	1.21	1758	0.72094	1
GO:0009069	serine family amino acid metabolic process	22	1	2.06	2133	0.88483	1
GO:0009081	branched-chain amino acid metabolic process	8	3	0.75	290	0.03181	1
GO:0009100	glycoprotein metabolic process	119	13	11.12	813	0.31849	1
GO:0009101	glycoprotein biosynthetic process	95	9	8.88	1287	0.53446	1
GO:0009112	nucleobase metabolic process	26	4	2.43	675	0.22094	1
GO:0009113	purine nucleobase biosynthetic process	9	1	0.84	1435	0.58661	1
GO:0009116	nucleoside metabolic process	48	3	4.48	2030	0.83921	1
GO:0009117	nucleotide metabolic process	195	9	18.22	2598	0.99583	1
GO:0009119	ribonucleoside metabolic process	31	3	2.9	1392	0.56387	1
GO:0009123	nucleoside monophosphate metabolic process	123	2	11.49	2741	0.99993	1
GO:0009124	nucleoside monophosphate biosynthetic process	54	2	5.05	2412	0.96757	1
GO:0009126	purine nucleoside monophosphate metabolic process	113	2	10.56	2728	0.99982	1
GO:0009127	purine nucleoside monophosphate biosynthetic process	45	2	4.2	2258	0.93234	1
GO:0009132	nucleoside diphosphate metabolic process	23	3	2.15	856	0.36544	1
GO:0009135	purine nucleoside diphosphate metabolic process	18	2	1.68	1257	0.51181	1
GO:0009142	nucleoside triphosphate biosynthetic process	43	3	4.02	1904	0.77958	1
GO:0009144	purine nucleoside triphosphate metabolic process	112	3	10.46	2650	0.99875	1
GO:0009145	purine nucleoside triphosphate biosynthetic process	42	3	3.92	1865	0.76568	1
GO:0009150	purine ribonucleotide metabolic process	149	4	13.92	2710	0.99971	1
GO:0009156	ribonucleoside monophosphate biosynthetic process	50	2	4.67	2352	0.9549	1
GO:0009161	ribonucleoside monophosphate metabolic process	119	2	11.12	2734	0.9999	1
GO:0009163	nucleoside biosynthetic process	20	2	1.87	1398	0.56993	1
GO:0009164	nucleoside catabolic process	11	1	1.03	1611	0.66035	1
GO:0009165	nucleotide biosynthetic process	98	4	9.16	2507	0.98524	1
GO:0009167	purine ribonucleoside monophosphate metabolic process	113	2	10.56	2729	0.99982	1
GO:0009168	purine ribonucleoside monophosphate biosynthetic process	45	2	4.2	2259	0.93234	1
GO:0009179	purine ribonucleoside diphosphate metabolic process	18	2	1.68	1258	0.51181	1
GO:0009185	ribonucleoside diphosphate metabolic process	18	2	1.68	1259	0.51181	1
GO:0009199	ribonucleoside triphosphate metabolic process	111	3	10.37	2646	0.99864	1
GO:0009201	ribonucleoside triphosphate biosynthetic process	42	3	3.92	1866	0.76568	1
GO:0009205	purine ribonucleoside triphosphate metabolic process	111	3	10.37	2647	0.99864	1
GO:0009218	pyrimidine ribonucleotide metabolic process	7	1	0.65	1213	0.4969	1
GO:0009225	nucleotide-sugar metabolic process	17	2	1.59	1144	0.48088	1
GO:0009247	glycolipid biosynthetic process	39	1	3.64	2460	0.97842	1
GO:0009250	glucan biosynthetic process	6	1	0.56	1071	0.445	1
GO:0009251	glucan catabolic process	12	1	1.12	1684	0.69213	1
GO:0009259	ribonucleotide metabolic process	154	4	14.39	2723	0.9998	1
GO:0009260	ribonucleotide biosynthetic process	78	4	7.29	2280	0.94188	1
GO:0009308	amine metabolic process	21	1	1.96	2099	0.87292	1
GO:0009311	oligosaccharide metabolic process	25	1	2.34	2211	0.91428	1
GO:0009404	toxin metabolic process	10	1	0.93	1522	0.62528	1
GO:0009410	response to xenobiotic stimulus	29	4	2.71	760	0.28445	1
GO:0009451	RNA modification	88	18	8.22	82	0.00109	1
GO:0009566	fertilization	30	1	2.8	2318	0.94761	1
GO:0009581	detection of external stimulus	71	6	6.63	1625	0.66259	1
GO:0009582	detection of abiotic stimulus	71	6	6.63	1626	0.66259	1
GO:0009583	detection of light stimulus	58	5	5.42	1555	0.6418	1
GO:0009584	detection of visible light	33	1	3.08	2372	0.96102	1
GO:0009605	response to external stimulus	721	84	67.37	241	0.01677	1
GO:0009607	response to biotic stimulus	269	25	25.13	1306	0.54335	1
GO:0009612	response to mechanical stimulus	24	3	2.24	973	0.39179	1
GO:0009615	response to virus	44	4	4.11	1472	0.59896	1
GO:0009628	response to abiotic stimulus	350	22	32.7	2516	0.98627	1
GO:0009629	response to gravity	19	2	1.78	1297	0.54151	1
GO:0009653	anatomical structure morphogenesis	1229	148	114.83	50	0.00032	1
GO:0009712	catechol-containing compound metabolic process	14	2	1.31	878	0.38137	1
GO:0009719	response to endogenous stimulus	184	16	17.19	1581	0.65788	1
GO:0009725	response to hormone	108	7	10.09	2139	0.88921	1
GO:0009743	response to carbohydrate	17	3	1.59	664	0.20791	1
GO:0009794	regulation of mitotic cell cycle, embryonic	14	1	1.31	1818	0.74706	1
GO:0009826	unidimensional cell growth	21	1	1.96	2100	0.87292	1
GO:0009886	post-embryonic animal morphogenesis	369	40	34.48	611	0.17731	1
GO:0009888	tissue development	860	119	80.36	17	3e-06	1
GO:0009889	regulation of biosynthetic process	1065	71	99.51	2708	0.9997	1
GO:0009890	negative regulation of biosynthetic process	364	25	34.01	2401	0.96506	1
GO:0009891	positive regulation of biosynthetic process	385	37	35.97	1111	0.45368	1
GO:0009892	negative regulation of metabolic process	628	45	58.68	2482	0.98174	1
GO:0009893	positive regulation of metabolic process	647	49	60.45	2362	0.95768	1
GO:0009894	regulation of catabolic process	169	3	15.79	2755	0.99999	1
GO:0009895	negative regulation of catabolic process	33	1	3.08	2373	0.96102	1
GO:0009914	hormone transport	12	3	1.12	436	0.09449	1
GO:0009948	anterior/posterior axis specification	123	17	11.49	355	0.06456	1
GO:0009954	proximal/distal pattern formation	18	5	1.68	263	0.02148	1
GO:0009966	regulation of signal transduction	645	45	60.27	2535	0.98947	1
GO:0009987	cellular process	5560	456	519.51	2787	1	1
GO:0009991	response to extracellular stimulus	126	8	11.77	2201	0.9129	1
GO:0009994	oocyte differentiation	155	11	14.48	2091	0.86926	1
GO:0010033	response to organic substance	394	35	36.81	1577	0.65311	1
GO:0010160	formation of animal organ boundary	35	7	3.27	305	0.04013	1
GO:0010166	wax metabolic process	13	4	1.21	274	0.02724	1
GO:0010256	endomembrane system organization	142	7	13.27	2491	0.98301	1
GO:0010259	multicellular organism aging	137	13	12.8	1277	0.52003	1
GO:0010453	regulation of cell fate commitment	28	7	2.62	209	0.01247	1
GO:0010454	negative regulation of cell fate commitment	18	4	1.68	412	0.08046	1
GO:0010458	exit from mitosis	12	1	1.12	1685	0.69213	1
GO:0010466	negative regulation of peptidase activity	23	1	2.15	2164	0.89563	1
GO:0010467	gene expression	1866	154	174.35	2436	0.97383	1
GO:0010498	proteasomal protein catabolic process	169	5	15.79	2715	0.99973	1
GO:0010506	regulation of autophagy	86	1	8.04	2721	0.99979	1
GO:0010556	regulation of macromolecule biosynthetic process	1026	69	95.87	2680	0.99949	1
GO:0010558	negative regulation of macromolecule biosynthetic process	353	25	32.98	2324	0.9486	1
GO:0010562	positive regulation of phosphorus metabolic process	146	11	13.64	1982	0.81501	1
GO:0010563	negative regulation of phosphorus metabolic process	74	6	6.91	1719	0.7018	1
GO:0010564	regulation of cell cycle process	143	10	13.36	2092	0.87162	1
GO:0010605	negative regulation of macromolecule metabolic process	594	44	55.5	2388	0.96449	1
GO:0010608	posttranscriptional regulation of gene expression	171	9	15.98	2492	0.9831	1
GO:0010623	programmed cell death involved in cell development	92	8	8.6	1552	0.63805	1
GO:0010631	epithelial cell migration	146	19	13.64	421	0.08578	1
GO:0010638	positive regulation of organelle organization	125	3	11.68	2685	0.99958	1
GO:0010639	negative regulation of organelle organization	80	2	7.47	2612	0.99651	1
GO:0010646	regulation of cell communication	724	49	67.65	2605	0.99623	1
GO:0010669	epithelial structure maintenance	14	3	1.31	547	0.1363	1
GO:0010675	regulation of cellular carbohydrate metabolic process	15	1	1.4	1892	0.77074	1
GO:0010720	positive regulation of cell development	82	9	7.66	849	0.35754	1
GO:0010769	regulation of cell morphogenesis involved in differentiation	64	5	5.98	1775	0.7265	1
GO:0010770	positive regulation of cell morphogenesis involved in differentiation	24	2	2.24	1640	0.67061	1
GO:0010817	regulation of hormone levels	61	14	5.7	84	0.00119	1
GO:0010830	regulation of myotube differentiation	7	1	0.65	1214	0.4969	1
GO:0010833	telomere maintenance via telomere lengthening	5	1	0.47	948	0.38775	1
GO:0010876	lipid localization	100	12	9.34	677	0.22157	1
GO:0010883	regulation of lipid storage	29	4	2.71	761	0.28445	1
GO:0010906	regulation of glucose metabolic process	11	1	1.03	1612	0.66035	1
GO:0010941	regulation of cell death	228	21	21.3	1389	0.56239	1
GO:0010942	positive regulation of cell death	72	6	6.73	1648	0.67601	1
GO:0010959	regulation of metal ion transport	32	2	2.99	1978	0.81442	1
GO:0010965	regulation of mitotic sister chromatid separation	30	2	2.8	1913	0.7849	1
GO:0010970	transport along microtubule	52	2	4.86	2377	0.96174	1
GO:0010972	negative regulation of G2/M transition of mitotic cell cycle	17	1	1.59	1965	0.81167	1
GO:0010975	regulation of neuron projection development	80	7	7.47	1543	0.62952	1
GO:0010976	positive regulation of neuron projection development	30	2	2.8	1914	0.7849	1
GO:0012501	programmed cell death	291	28	27.19	1120	0.46444	1
GO:0014016	neuroblast differentiation	27	9	2.52	59	0.00051	1
GO:0014041	regulation of neuron maturation	10	2	0.93	700	0.23855	1
GO:0014042	positive regulation of neuron maturation	5	1	0.47	949	0.38775	1
GO:0014074	response to purine-containing compound	10	1	0.93	1523	0.62528	1
GO:0014706	striated muscle tissue development	22	3	2.06	827	0.3389	1
GO:0014902	myotube differentiation	47	2	4.39	2290	0.94242	1
GO:0015031	protein transport	379	21	35.41	2632	0.998	1
GO:0015672	monovalent inorganic cation transport	97	4	9.06	2501	0.98414	1
GO:0015698	inorganic anion transport	40	5	3.74	812	0.31711	1
GO:0015749	monosaccharide transmembrane transport	17	4	1.59	366	0.06735	1
GO:0015780	nucleotide-sugar transmembrane transport	7	1	0.65	1215	0.4969	1
GO:0015833	peptide transport	386	23	36.07	2585	0.99492	1
GO:0015849	organic acid transport	65	7	6.07	987	0.40594	1
GO:0015850	organic hydroxy compound transport	26	5	2.43	425	0.08917	1
GO:0015908	fatty acid transport	8	1	0.75	1352	0.54395	1
GO:0015909	long-chain fatty acid transport	6	1	0.56	1072	0.445	1
GO:0015931	nucleobase-containing compound transport	114	7	10.65	2223	0.91817	1
GO:0015980	energy derivation by oxidation of organic compounds	120	5	11.21	2546	0.99022	1
GO:0016032	viral process	10	1	0.93	1524	0.62528	1
GO:0016043	cellular component organization	2219	166	207.34	2735	0.9999	1
GO:0016049	cell growth	137	8	12.8	2333	0.95003	1
GO:0016050	vesicle organization	108	5	10.09	2457	0.97811	1
GO:0016052	carbohydrate catabolic process	39	3	3.64	1739	0.71968	1
GO:0016053	organic acid biosynthetic process	100	19	9.34	98	0.00201	1
GO:0016054	organic acid catabolic process	86	6	8.04	1998	0.82691	1
GO:0016056	rhodopsin mediated signaling pathway	19	1	1.78	2045	0.84529	1
GO:0016070	RNA metabolic process	1519	109	141.93	2703	0.99966	1
GO:0016071	mRNA metabolic process	338	16	31.58	2689	0.99959	1
GO:0016072	rRNA metabolic process	140	22	13.08	196	0.01022	1
GO:0016073	snRNA metabolic process	35	5	3.27	681	0.22484	1
GO:0016079	synaptic vesicle exocytosis	48	2	4.48	2310	0.94691	1
GO:0016125	sterol metabolic process	25	4	2.34	635	0.20067	1
GO:0016126	sterol biosynthetic process	18	4	1.68	413	0.08046	1
GO:0016180	snRNA processing	24	4	2.24	617	0.18099	1
GO:0016198	axon choice point recognition	21	3	1.96	805	0.3123	1
GO:0016236	macroautophagy	70	2	6.54	2554	0.99165	1
GO:0016310	phosphorylation	503	29	47	2659	0.99907	1
GO:0016322	neuron remodeling	47	2	4.39	2291	0.94242	1
GO:0016333	morphogenesis of follicular epithelium	46	4	4.3	1550	0.63472	1
GO:0016358	dendrite development	139	17	12.99	560	0.15073	1
GO:0016441	posttranscriptional gene silencing	53	3	4.95	2126	0.88438	1
GO:0016556	mRNA modification	11	1	1.03	1613	0.66035	1
GO:0016569	covalent chromatin modification	176	3	16.44	2761	1	1
GO:0016999	antibiotic metabolic process	47	2	4.39	2292	0.94242	1
GO:0017156	calcium ion regulated exocytosis	48	2	4.48	2311	0.94691	1
GO:0018022	peptidyl-lysine methylation	46	2	4.3	2270	0.93757	1
GO:0018193	peptidyl-amino acid modification	282	11	26.35	2733	0.99988	1
GO:0018196	peptidyl-asparagine modification	8	2	0.75	596	0.16752	1
GO:0018209	peptidyl-serine modification	49	3	4.58	2050	0.84931	1
GO:0018210	peptidyl-threonine modification	22	2	2.06	1488	0.62286	1
GO:0018212	peptidyl-tyrosine modification	30	2	2.8	1915	0.7849	1
GO:0018410	C-terminal protein amino acid modification	8	1	0.75	1353	0.54395	1
GO:0018958	phenol-containing compound metabolic process	61	4	5.7	2028	0.83454	1
GO:0018992	germ-line sex determination	5	1	0.47	950	0.38775	1
GO:0018993	somatic sex determination	13	2	1.21	838	0.34636	1
GO:0019058	viral life cycle	9	1	0.84	1436	0.58661	1
GO:0019079	viral genome replication	6	1	0.56	1073	0.445	1
GO:0019094	pole plasm mRNA localization	50	3	4.67	2066	0.85886	1
GO:0019098	reproductive behavior	84	9	7.85	884	0.38497	1
GO:0019219	regulation of nucleobase-containing compound metabolic process	1015	67	94.84	2707	0.99969	1
GO:0019220	regulation of phosphate metabolic process	254	19	23.73	2115	0.87687	1
GO:0019222	regulation of metabolic process	1646	102	153.8	2778	1	1
GO:0019318	hexose metabolic process	42	3	3.92	1867	0.76568	1
GO:0019359	nicotinamide nucleotide biosynthetic process	23	2	2.15	1562	0.64737	1
GO:0019362	pyridine nucleotide metabolic process	33	5	3.08	629	0.19045	1
GO:0019363	pyridine nucleotide biosynthetic process	23	2	2.15	1563	0.64737	1
GO:0019368	fatty acid elongation, unsaturated fatty acid	13	6	1.21	68	0.00063	1
GO:0019395	fatty acid oxidation	35	2	3.27	2056	0.85193	1
GO:0019438	aromatic compound biosynthetic process	1143	78	106.8	2692	0.9996	1
GO:0019439	aromatic compound catabolic process	156	13	14.58	1724	0.70972	1
GO:0019682	glyceraldehyde-3-phosphate metabolic process	8	2	0.75	597	0.16752	1
GO:0019693	ribose phosphate metabolic process	159	6	14.86	2631	0.99798	1
GO:0019720	Mo-molybdopterin cofactor metabolic process	5	1	0.47	951	0.38775	1
GO:0019725	cellular homeostasis	190	16	17.75	1722	0.70765	1
GO:0019748	secondary metabolic process	82	7	7.66	1578	0.65567	1
GO:0019751	polyol metabolic process	30	4	2.8	778	0.30622	1
GO:0019752	carboxylic acid metabolic process	316	34	29.53	672	0.21335	1
GO:0019827	stem cell population maintenance	81	10	7.57	678	0.22205	1
GO:0019856	pyrimidine nucleobase biosynthetic process	7	2	0.65	538	0.13359	1
GO:0019915	lipid storage	44	4	4.11	1473	0.59896	1
GO:0019932	second-messenger-mediated signaling	53	4	4.95	1803	0.74285	1
GO:0019933	cAMP-mediated signaling	25	2	2.34	1703	0.69259	1
GO:0019935	cyclic-nucleotide-mediated signaling	34	2	3.18	2034	0.84027	1
GO:0019941	modification-dependent protein catabolic process	206	7	19.25	2718	0.99977	1
GO:0019953	sexual reproduction	829	82	77.46	773	0.30089	1
GO:0021700	developmental maturation	205	18	19.15	1557	0.64656	1
GO:0022008	neurogenesis	716	80	66.9	325	0.04666	1
GO:0022400	regulation of rhodopsin mediated signaling pathway	15	1	1.4	1893	0.77074	1
GO:0022402	cell cycle process	482	17	45.04	2777	1	1
GO:0022404	molting cycle process	48	11	4.48	128	0.00396	1
GO:0022406	membrane docking	28	2	2.62	1848	0.75133	1
GO:0022407	regulation of cell-cell adhesion	25	6	2.34	267	0.02463	1
GO:0022410	circadian sleep/wake cycle process	29	1	2.71	2286	0.94219	1
GO:0022412	cellular process involved in reproduction in multicellular organism	726	73	67.84	733	0.26252	1
GO:0022414	reproductive process	924	99	86.34	398	0.07241	1
GO:0022604	regulation of cell morphogenesis	115	10	10.75	1556	0.64257	1
GO:0022607	cellular component assembly	945	67	88.3	2611	0.99644	1
GO:0022610	biological adhesion	159	35	14.86	12	1e-06	1
GO:0022612	gland morphogenesis	81	12	7.57	397	0.07207	1
GO:0022613	ribonucleoprotein complex biogenesis	272	41	25.41	85	0.00132	1
GO:0022618	ribonucleoprotein complex assembly	120	15	11.21	559	0.14933	1
GO:0022898	regulation of transmembrane transporter activity	15	2	1.4	994	0.41556	1
GO:0023051	regulation of signaling	730	49	68.21	2615	0.99696	1
GO:0023052	signaling	1426	109	133.24	2583	0.99475	1
GO:0030001	metal ion transport	140	8	13.08	2361	0.95734	1
GO:0030003	cellular cation homeostasis	102	9	9.53	1482	0.62251	1
GO:0030004	cellular monovalent inorganic cation homeostasis	37	2	3.46	2109	0.87295	1
GO:0030029	actin filament-based process	250	19	23.36	2075	0.86005	1
GO:0030030	cell projection organization	496	59	46.34	279	0.02894	1
GO:0030036	actin cytoskeleton organization	238	17	22.24	2195	0.90714	1
GO:0030071	regulation of mitotic metaphase/anaphase transition	27	1	2.52	2250	0.9296	1
GO:0030072	peptide hormone secretion	9	3	0.84	316	0.04446	1
GO:0030111	regulation of Wnt signaling pathway	75	6	7.01	1735	0.71417	1
GO:0030149	sphingolipid catabolic process	16	1	1.49	1926	0.79221	1
GO:0030163	protein catabolic process	258	9	24.11	2743	0.99994	1
GO:0030166	proteoglycan biosynthetic process	18	1	1.68	2017	0.82931	1
GO:0030178	negative regulation of Wnt signaling pathway	29	3	2.71	1274	0.51758	1
GO:0030182	neuron differentiation	601	67	56.16	370	0.06756	1
GO:0030203	glycosaminoglycan metabolic process	23	3	2.15	857	0.36544	1
GO:0030204	chondroitin sulfate metabolic process	10	1	0.93	1525	0.62528	1
GO:0030237	female sex determination	13	2	1.21	839	0.34636	1
GO:0030239	myofibril assembly	42	2	3.92	2204	0.91405	1
GO:0030258	lipid modification	78	6	7.29	1830	0.74912	1
GO:0030262	apoptotic nuclear changes	9	2	0.84	651	0.20268	1
GO:0030431	sleep	62	1	5.79	2629	0.99778	1
GO:0030516	regulation of axon extension	20	2	1.87	1399	0.56993	1
GO:0030534	adult behavior	124	13	11.59	863	0.37385	1
GO:0030539	male genitalia development	18	2	1.68	1260	0.51181	1
GO:0030540	female genitalia development	6	1	0.56	1074	0.445	1
GO:0030641	regulation of cellular pH	33	2	3.08	2002	0.82778	1
GO:0030704	vitelline membrane formation	11	9	1.03	5	2.4e-08	1
GO:0030808	regulation of nucleotide biosynthetic process	8	2	0.75	598	0.16752	1
GO:0030832	regulation of actin filament length	56	2	5.23	2427	0.97255	1
GO:0030833	regulation of actin filament polymerization	52	2	4.86	2378	0.96174	1
GO:0030855	epithelial cell differentiation	347	52	32.42	53	0.00036	1
GO:0030865	cortical cytoskeleton organization	60	2	5.61	2468	0.98038	1
GO:0030952	establishment or maintenance of cytoskeleton polarity	49	1	4.58	2558	0.99196	1
GO:0031033	myosin filament organization	13	2	1.21	840	0.34636	1
GO:0031047	gene silencing by RNA	64	3	5.98	2303	0.94628	1
GO:0031050	dsRNA fragmentation	21	2	1.96	1466	0.59704	1
GO:0031056	regulation of histone modification	45	1	4.2	2527	0.98807	1
GO:0031060	regulation of histone methylation	26	1	2.43	2232	0.92231	1
GO:0031099	regeneration	23	1	2.15	2165	0.89563	1
GO:0031109	microtubule polymerization or depolymerization	37	1	3.46	2432	0.97372	1
GO:0031110	regulation of microtubule polymerization or depolymerization	18	1	1.68	2018	0.82931	1
GO:0031111	negative regulation of microtubule polymerization or depolymerization	11	1	1.03	1614	0.66035	1
GO:0031114	regulation of microtubule depolymerization	13	1	1.21	1759	0.72094	1
GO:0031123	RNA 3'-end processing	70	9	6.54	653	0.2035	1
GO:0031124	mRNA 3'-end processing	40	3	3.74	1795	0.73574	1
GO:0031324	negative regulation of cellular metabolic process	510	33	47.65	2573	0.99368	1
GO:0031326	regulation of cellular biosynthetic process	1060	71	99.04	2700	0.99964	1
GO:0031327	negative regulation of cellular biosynthetic process	362	25	33.82	2380	0.96246	1
GO:0031330	negative regulation of cellular catabolic process	31	1	2.9	2344	0.95252	1
GO:0031333	negative regulation of protein complex assembly	13	1	1.21	1760	0.72094	1
GO:0031334	positive regulation of protein complex assembly	53	1	4.95	2581	0.99459	1
GO:0031344	regulation of cell projection organization	110	9	10.28	1726	0.71135	1
GO:0031345	negative regulation of cell projection organization	14	1	1.31	1819	0.74706	1
GO:0031346	positive regulation of cell projection organization	52	2	4.86	2379	0.96174	1
GO:0031347	regulation of defense response	115	6	10.75	2387	0.96426	1
GO:0031348	negative regulation of defense response	32	1	2.99	2356	0.95698	1
GO:0031349	positive regulation of defense response	66	5	6.17	1839	0.75129	1
GO:0031396	regulation of protein ubiquitination	27	1	2.52	2251	0.9296	1
GO:0031400	negative regulation of protein modification process	84	7	7.85	1654	0.68069	1
GO:0031401	positive regulation of protein modification process	166	11	15.51	2221	0.91746	1
GO:0031497	chromatin assembly	40	1	3.74	2473	0.98045	1
GO:0031503	protein-containing complex localization	66	4	6.17	2114	0.87666	1
GO:0031570	DNA integrity checkpoint	37	1	3.46	2433	0.97372	1
GO:0031589	cell-substrate adhesion	19	6	1.78	148	0.00611	1
GO:0031667	response to nutrient levels	124	8	11.59	2180	0.90406	1
GO:0031668	cellular response to extracellular stimulus	63	6	5.89	1309	0.54367	1
GO:0031929	TOR signaling	56	1	5.23	2601	0.99597	1
GO:0031935	regulation of chromatin silencing	40	1	3.74	2474	0.98045	1
GO:0032006	regulation of TOR signaling	41	1	3.83	2485	0.98229	1
GO:0032008	positive regulation of TOR signaling	28	1	2.62	2266	0.9362	1
GO:0032011	ARF protein signal transduction	17	2	1.59	1145	0.48088	1
GO:0032101	regulation of response to external stimulus	112	8	10.46	2024	0.83391	1
GO:0032103	positive regulation of response to external stimulus	43	3	4.02	1905	0.77958	1
GO:0032200	telomere organization	29	3	2.71	1275	0.51758	1
GO:0032239	regulation of nucleobase-containing compound transport	8	1	0.75	1354	0.54395	1
GO:0032268	regulation of cellular protein metabolic process	514	28	48.03	2712	0.99971	1
GO:0032269	negative regulation of cellular protein metabolic process	189	12	17.66	2312	0.94718	1
GO:0032270	positive regulation of cellular protein metabolic process	246	13	22.99	2574	0.99379	1
GO:0032271	regulation of protein polymerization	57	2	5.33	2442	0.97475	1
GO:0032272	negative regulation of protein polymerization	12	1	1.12	1686	0.69213	1
GO:0032273	positive regulation of protein polymerization	38	1	3.55	2450	0.97619	1
GO:0032309	icosanoid secretion	5	1	0.47	952	0.38775	1
GO:0032365	intracellular lipid transport	8	1	0.75	1355	0.54395	1
GO:0032366	intracellular sterol transport	7	1	0.65	1216	0.4969	1
GO:0032409	regulation of transporter activity	15	2	1.4	995	0.41556	1
GO:0032410	negative regulation of transporter activity	7	1	0.65	1217	0.4969	1
GO:0032411	positive regulation of transporter activity	7	1	0.65	1218	0.4969	1
GO:0032412	regulation of ion transmembrane transporter activity	15	2	1.4	996	0.41556	1
GO:0032446	protein modification by small protein conjugation	168	4	15.7	2744	0.99994	1
GO:0032501	multicellular organismal process	2542	272	237.52	109	0.00221	1
GO:0032502	developmental process	2185	236	204.16	118	0.00323	1
GO:0032506	cytokinetic process	33	1	3.08	2374	0.96102	1
GO:0032535	regulation of cellular component size	150	8	14.02	2444	0.9753	1
GO:0032774	RNA biosynthetic process	936	63	87.46	2662	0.99908	1
GO:0032787	monocarboxylic acid metabolic process	130	16	12.15	562	0.15374	1
GO:0032868	response to insulin	41	3	3.83	1833	0.75107	1
GO:0032869	cellular response to insulin stimulus	39	3	3.64	1740	0.71968	1
GO:0032872	regulation of stress-activated MAPK cascade	53	3	4.95	2127	0.88438	1
GO:0032873	negative regulation of stress-activated MAPK cascade	24	2	2.24	1641	0.67061	1
GO:0032874	positive regulation of stress-activated MAPK cascade	23	1	2.15	2166	0.89563	1
GO:0032880	regulation of protein localization	77	6	7.19	1797	0.73783	1
GO:0032881	regulation of polysaccharide metabolic process	5	1	0.47	953	0.38775	1
GO:0032940	secretion by cell	175	15	16.35	1649	0.67729	1
GO:0032956	regulation of actin cytoskeleton organization	88	3	8.22	2551	0.99124	1
GO:0032970	regulation of actin filament-based process	89	3	8.32	2556	0.99191	1
GO:0032984	protein-containing complex disassembly	66	1	6.17	2641	0.9985	1
GO:0032989	cellular component morphogenesis	570	80	53.26	34	9.6e-05	1
GO:0032990	cell part morphogenesis	374	49	34.95	177	0.00874	1
GO:0033036	macromolecule localization	725	52	67.74	2523	0.98767	1
GO:0033043	regulation of organelle organization	355	10	33.17	2775	1	1
GO:0033044	regulation of chromosome organization	133	4	12.43	2655	0.99894	1
GO:0033045	regulation of sister chromatid segregation	37	2	3.46	2110	0.87295	1
GO:0033047	regulation of mitotic sister chromatid segregation	32	2	2.99	1979	0.81442	1
GO:0033059	cellular pigmentation	10	1	0.93	1526	0.62528	1
GO:0033060	ocellus pigmentation	15	3	1.4	576	0.15917	1
GO:0033157	regulation of intracellular protein transport	25	1	2.34	2212	0.91428	1
GO:0033206	meiotic cytokinesis	34	1	3.18	2395	0.96468	1
GO:0033301	cell cycle comprising mitosis without cytokinesis	24	1	2.24	2183	0.90541	1
GO:0033365	protein localization to organelle	169	5	15.79	2716	0.99973	1
GO:0033500	carbohydrate homeostasis	35	2	3.27	2057	0.85193	1
GO:0033554	cellular response to stress	492	23	45.97	2753	0.99998	1
GO:0033673	negative regulation of kinase activity	26	3	2.43	1025	0.44353	1
GO:0033750	ribosome localization	11	2	1.03	751	0.27468	1
GO:0033865	nucleoside bisphosphate metabolic process	9	1	0.84	1437	0.58661	1
GO:0033866	nucleoside bisphosphate biosynthetic process	7	1	0.65	1219	0.4969	1
GO:0033875	ribonucleoside bisphosphate metabolic process	9	1	0.84	1438	0.58661	1
GO:0034032	purine nucleoside bisphosphate metabolic process	9	1	0.84	1439	0.58661	1
GO:0034097	response to cytokine	12	1	1.12	1687	0.69213	1
GO:0034219	carbohydrate transmembrane transport	18	4	1.68	414	0.08046	1
GO:0034220	ion transmembrane transport	213	13	19.9	2414	0.96783	1
GO:0034248	regulation of cellular amide metabolic process	181	10	16.91	2463	0.97896	1
GO:0034249	negative regulation of cellular amide metabolic process	78	4	7.29	2281	0.94188	1
GO:0034250	positive regulation of cellular amide metabolic process	53	4	4.95	1804	0.74285	1
GO:0034285	response to disaccharide	11	2	1.03	752	0.27468	1
GO:0034311	diol metabolic process	5	1	0.47	954	0.38775	1
GO:0034329	cell junction assembly	56	2	5.23	2428	0.97255	1
GO:0034330	cell junction organization	76	6	7.1	1774	0.72618	1
GO:0034404	nucleobase-containing small molecule biosynthetic process	52	7	4.86	668	0.20859	1
GO:0034440	lipid oxidation	36	2	3.36	2078	0.86281	1
GO:0034470	ncRNA processing	226	33	21.12	149	0.00619	1
GO:0034471	ncRNA 5'-end processing	8	1	0.75	1356	0.54395	1
GO:0034472	snRNA 3'-end processing	22	4	2.06	553	0.14381	1
GO:0034622	cellular protein-containing complex assembly	379	22	35.41	2603	0.99619	1
GO:0034637	cellular carbohydrate biosynthetic process	23	2	2.15	1564	0.64737	1
GO:0034641	cellular nitrogen compound metabolic process	2354	177	219.95	2740	0.99993	1
GO:0034645	cellular macromolecule biosynthetic process	1546	116	144.45	2634	0.9982	1
GO:0034654	nucleobase-containing compound biosynthetic process	1091	72	101.94	2730	0.99982	1
GO:0034655	nucleobase-containing compound catabolic process	141	13	13.17	1390	0.56346	1
GO:0034656	nucleobase-containing small molecule catabolic process	11	1	1.03	1615	0.66035	1
GO:0034660	ncRNA metabolic process	295	35	27.56	417	0.08158	1
GO:0034661	ncRNA catabolic process	15	4	1.4	321	0.04479	1
GO:0034754	cellular hormone metabolic process	34	8	3.18	201	0.0113	1
GO:0034762	regulation of transmembrane transport	18	2	1.68	1261	0.51181	1
GO:0034763	negative regulation of transmembrane transport	7	1	0.65	1220	0.4969	1
GO:0034764	positive regulation of transmembrane transport	9	1	0.84	1440	0.58661	1
GO:0034765	regulation of ion transmembrane transport	18	2	1.68	1262	0.51181	1
GO:0034766	negative regulation of ion transmembrane transport	7	1	0.65	1221	0.4969	1
GO:0034767	positive regulation of ion transmembrane transport	9	1	0.84	1441	0.58661	1
GO:0034968	histone lysine methylation	43	1	4.02	2510	0.98546	1
GO:0034976	response to endoplasmic reticulum stress	71	2	6.63	2561	0.99234	1
GO:0035026	leading edge cell differentiation	5	3	0.47	169	0.00703	1
GO:0035069	larval midgut histolysis	26	1	2.43	2233	0.92231	1
GO:0035070	salivary gland histolysis	31	1	2.9	2345	0.95252	1
GO:0035082	axoneme assembly	15	1	1.4	1894	0.77074	1
GO:0035090	maintenance of apical/basal cell polarity	9	1	0.84	1442	0.58661	1
GO:0035107	appendage morphogenesis	262	31	24.48	446	0.0993	1
GO:0035112	genitalia morphogenesis	16	2	1.49	1104	0.44876	1
GO:0035114	imaginal disc-derived appendage morphogenesis	260	31	24.29	427	0.09209	1
GO:0035120	post-embryonic appendage morphogenesis	256	30	23.92	498	0.11335	1
GO:0035126	post-embryonic genitalia morphogenesis	15	2	1.4	997	0.41556	1
GO:0035146	tube fusion	16	4	1.49	337	0.05545	1
GO:0035148	tube formation	27	7	2.52	194	0.01015	1
GO:0035150	regulation of tube size	48	7	4.48	563	0.15661	1
GO:0035153	epithelial cell type specification, open tracheal system	14	5	1.31	162	0.00687	1
GO:0035166	post-embryonic hemopoiesis	36	6	3.36	500	0.1142	1
GO:0035171	lamellocyte differentiation	12	1	1.12	1688	0.69213	1
GO:0035186	syncytial blastoderm mitotic cell cycle	21	1	1.96	2101	0.87292	1
GO:0035194	posttranscriptional gene silencing by RNA	51	3	4.77	2084	0.86787	1
GO:0035195	gene silencing by miRNA	30	2	2.8	1916	0.7849	1
GO:0035203	regulation of lamellocyte differentiation	8	1	0.75	1357	0.54395	1
GO:0035209	pupal development	15	1	1.4	1895	0.77074	1
GO:0035216	haltere disc development	11	3	1.03	406	0.07595	1
GO:0035221	genital disc pattern formation	6	3	0.56	225	0.01309	1
GO:0035264	multicellular organism growth	43	6	4.02	670	0.20927	1
GO:0035272	exocrine system development	109	18	10.18	204	0.01174	1
GO:0035282	segmentation	198	24	18.5	493	0.11043	1
GO:0035285	appendage segmentation	21	4	1.96	514	0.12647	1
GO:0035287	head segmentation	11	2	1.03	753	0.27468	1
GO:0035296	regulation of tube diameter	12	2	1.12	792	0.31072	1
GO:0035315	hair cell differentiation	40	1	3.74	2475	0.98045	1
GO:0035316	non-sensory hair organization	40	1	3.74	2476	0.98045	1
GO:0035329	hippo signaling	30	1	2.8	2319	0.94761	1
GO:0035330	regulation of hippo signaling	23	1	2.15	2167	0.89563	1
GO:0035337	fatty-acyl-CoA metabolic process	16	4	1.49	338	0.05545	1
GO:0035383	thioester metabolic process	34	5	3.18	657	0.20741	1
GO:0035637	multicellular organismal signaling	6	1	0.56	1075	0.445	1
GO:0035803	egg coat formation	11	9	1.03	6	2.4e-08	1
GO:0035825	homologous recombination	28	2	2.62	1849	0.75133	1
GO:0035966	response to topologically incorrect protein	35	3	3.27	1569	0.64785	1
[truncated: 1,861 more rows]

## Sheet: GO_mismatch_down
GO.ID	Term	Annotated	Significant	Expected	Rank in Fisher.classic	Fisher.classic	Fisher.weight01
GO:0006270	DNA replication initiation	23	11	1.78	24	3.2e-07	3.2e-07
GO:0007140	male meiotic nuclear division	57	13	4.42	47	0.00032	6.6e-07
GO:0045005	DNA-dependent DNA replication maintenance of fidelity	10	6	0.78	37	3.4e-05	3.4e-05
GO:0034508	centromere complex assembly	7	5	0.54	39	5.1e-05	5.1e-05
GO:0006281	DNA repair	155	36	12.02	16	1.3e-09	5.9e-05
GO:0007018	microtubule-based movement	88	14	6.82	119	0.00736	0.00023
GO:0014866	skeletal myofibril assembly	6	4	0.47	52	0.00047	0.00047
GO:0032837	distributive segregation	6	4	0.47	53	0.00047	0.00047
GO:0007076	mitotic chromosome condensation	20	7	1.55	55	0.00052	0.00052
GO:0045931	positive regulation of mitotic cell cycle	33	9	2.56	59	0.00068	0.00084
GO:0042023	DNA endoreduplication	22	7	1.71	64	0.00099	0.00086
GO:0051445	regulation of meiotic cell cycle	17	6	1.32	72	0.00125	0.00103
GO:0051383	kinetochore organization	7	4	0.54	66	0.00104	0.00104
GO:0016321	female meiosis chromosome segregation	29	8	2.25	69	0.00124	0.00124
GO:0007052	mitotic spindle organization	68	14	5.27	57	0.00059	0.0013
GO:0051306	mitotic sister chromatid separation	34	10	2.64	42	0.00017	0.00171
GO:0007080	mitotic metaphase plate congression	14	5	1.09	88	0.00306	0.00306
GO:0016360	sensory organ precursor cell fate determination	14	5	1.09	89	0.00306	0.00306
GO:0031573	intra-S DNA damage checkpoint	9	4	0.7	92	0.00329	0.00329
GO:0009949	polarity specification of anterior/posterior axis	5	3	0.39	96	0.00412	0.00412
GO:0050881	musculoskeletal movement	5	3	0.39	97	0.00412	0.00412
GO:0008608	attachment of spindle microtubules to kinetochore	10	4	0.78	105	0.00515	0.00515
GO:0032465	regulation of cytokinesis	10	4	0.78	106	0.00515	0.00515
GO:0006334	nucleosome assembly	22	7	1.71	65	0.00099	0.00579
GO:1902749	regulation of cell cycle G2/M phase transition	30	8	2.33	77	0.00157	0.00592
GO:1901989	positive regulation of cell cycle phase transition	21	6	1.63	100	0.00419	0.00595
GO:0051231	spindle elongation	12	4	0.93	140	0.01071	0.00598
GO:0006277	DNA amplification	19	4	1.47	249	0.05449	0.00599
GO:0007099	centriole replication	23	6	1.78	113	0.00683	0.00683
GO:0001578	microtubule bundle formation	26	7	2.02	86	0.0029	0.00751
GO:0000281	mitotic cytokinesis	54	10	4.19	122	0.00772	0.00772
GO:0009951	polarity specification of dorsal/ventral axis	6	3	0.47	123	0.00777	0.00777
GO:2000104	negative regulation of DNA-dependent DNA replication	6	3	0.47	124	0.00777	0.00777
GO:0000724	double-strand break repair via homologous recombination	38	9	2.95	78	0.00202	0.00838
GO:0007062	sister chromatid cohesion	23	6	1.78	114	0.00683	0.01005
GO:0016233	telomere capping	12	4	0.93	141	0.01071	0.01071
GO:0006261	DNA-dependent DNA replication	82	30	6.36	7	1.1e-13	0.01152
GO:0000712	resolution of meiotic recombination intermediates	7	3	0.54	143	0.01281	0.01281
GO:0016925	protein sumoylation	7	3	0.54	144	0.01281	0.01281
GO:0019985	translesion synthesis	7	3	0.54	145	0.01281	0.01281
GO:0040003	chitin-based cuticle development	82	11	6.36	229	0.05078	0.01396
GO:0016572	histone phosphorylation	13	4	1.01	149	0.01453	0.01453
GO:0006325	chromatin organization	327	35	25.36	185	0.03065	0.01533
GO:0043252	sodium-independent organic anion transport	27	6	2.09	151	0.01537	0.01537
GO:0007131	reciprocal meiotic recombination	27	8	2.09	61	0.00073	0.01578
GO:0032774	RNA biosynthetic process	936	86	72.58	219	0.04769	0.0163
GO:0008589	regulation of smoothened signaling pathway	34	4	2.64	543	0.26832	0.01711
GO:0030261	chromosome condensation	48	13	3.72	38	4.9e-05	0.01752
GO:0030239	myofibril assembly	42	9	3.26	99	0.00418	0.01902
GO:0006941	striated muscle contraction	8	3	0.62	163	0.01933	0.01933
GO:0009631	cold acclimation	8	3	0.62	164	0.01933	0.01933
GO:0036297	interstrand cross-link repair	8	3	0.62	165	0.01933	0.01933
GO:0035186	syncytial blastoderm mitotic cell cycle	21	6	1.63	101	0.00419	0.0243
GO:1902115	regulation of organelle assembly	24	5	1.86	194	0.0341	0.02448
GO:0016458	gene silencing	165	18	12.79	306	0.08746	0.02698
GO:0006936	muscle contraction	23	6	1.78	115	0.00683	0.02711
GO:0007095	mitotic G2 DNA damage checkpoint	9	3	0.7	177	0.02736	0.02736
GO:0031000	response to caffeine	9	3	0.7	178	0.02736	0.02736
GO:0040015	negative regulation of multicellular organism growth	9	3	0.7	179	0.02736	0.02736
GO:0007422	peripheral nervous system development	74	11	5.74	176	0.02637	0.02952
GO:0008356	asymmetric cell division	94	11	7.29	360	0.11011	0.03057
GO:0046323	glucose import	16	4	1.24	186	0.03074	0.03074
GO:0045478	fusome organization	14	3	1.09	310	0.0889	0.03239
GO:0007488	histoblast morphogenesis	10	3	0.78	199	0.03688	0.03688
GO:0045143	homologous chromosome segregation	10	3	0.78	200	0.03688	0.03688
GO:0048082	regulation of adult chitin-containing cuticle pigmentation	10	3	0.78	201	0.03688	0.03688
GO:0006355	regulation of transcription, DNA-templated	872	82	67.62	189	0.03286	0.03908
GO:0007498	mesoderm development	75	10	5.82	264	0.06285	0.0409
GO:0007088	regulation of mitotic nuclear division	61	13	4.73	58	0.00065	0.0443
GO:0031647	regulation of protein stability	48	5	3.72	579	0.3145	0.04606
GO:0035222	wing disc pattern formation	60	7	4.65	449	0.18069	0.04781
GO:0006284	base-excision repair	11	3	0.85	220	0.04786	0.04786
GO:0006919	activation of cysteine-type endopeptidase activity involved in apoptotic process	11	3	0.85	221	0.04786	0.04786
GO:0007113	endomitotic cell cycle	11	3	0.85	222	0.04786	0.04786
GO:0000727	double-strand break repair via break-induced replication	5	2	0.39	231	0.05128	0.05128
GO:0007057	spindle assembly involved in female meiosis I	5	2	0.39	232	0.05128	0.05128
GO:0009071	serine family amino acid catabolic process	5	2	0.39	233	0.05128	0.05128
GO:0040016	embryonic cleavage	5	2	0.39	234	0.05128	0.05128
GO:0042682	regulation of compound eye cone cell fate specification	5	2	0.39	235	0.05128	0.05128
GO:0044380	protein localization to cytoskeleton	5	2	0.39	236	0.05128	0.05128
GO:0060213	positive regulation of nuclear-transcribed mRNA poly(A) tail shortening	5	2	0.39	237	0.05128	0.05128
GO:0071689	muscle thin filament assembly	5	2	0.39	238	0.05128	0.05128
GO:0090224	regulation of spindle organization	5	2	0.39	239	0.05128	0.05128
GO:2001022	positive regulation of response to DNA damage stimulus	5	2	0.39	240	0.05128	0.05128
GO:0060047	heart contraction	25	3	1.94	573	0.30581	0.05137
GO:0030182	neuron differentiation	601	35	46.6	2326	0.97648	0.0537
GO:0045746	negative regulation of Notch signaling pathway	36	6	2.79	252	0.05621	0.05621
GO:0000082	G1/S transition of mitotic cell cycle	34	8	2.64	93	0.00371	0.05937
GO:0000212	meiotic spindle organization	30	7	2.33	116	0.00686	0.05956
GO:0007100	mitotic centrosome separation	12	3	0.93	255	0.06024	0.06024
GO:0001751	compound eye photoreceptor cell differentiation	140	10	10.86	1406	0.65407	0.06102
GO:0090307	mitotic spindle assembly	28	5	2.17	263	0.06121	0.06121
GO:0000915	actomyosin contractile ring assembly	20	4	1.55	267	0.0641	0.0641
GO:0007155	cell adhesion	158	12	12.25	1187	0.57409	0.0644
GO:0043087	regulation of GTPase activity	86	7	6.67	1019	0.50464	0.07049
GO:0065004	protein-DNA complex assembly	58	13	4.5	51	0.00039	0.0719
GO:0000077	DNA damage checkpoint	34	9	2.64	62	0.00086	0.07258
GO:0000076	DNA replication checkpoint	14	4	1.09	161	0.01913	0.07272
GO:0000723	telomere maintenance	29	8	2.25	70	0.00124	0.07277
GO:0006308	DNA catabolic process	17	3	1.32	385	0.14021	0.073
GO:0006336	DNA replication-independent nucleosome assembly	6	2	0.47	274	0.07304	0.07304
GO:0006570	tyrosine metabolic process	6	2	0.47	275	0.07304	0.07304
GO:0007348	regulation of syncytial blastoderm mitotic cell cycle	6	2	0.47	276	0.07304	0.07304
GO:0016540	protein autoprocessing	6	2	0.47	277	0.07304	0.07304
GO:0031397	negative regulation of protein ubiquitination	6	2	0.47	278	0.07304	0.07304
GO:0032233	positive regulation of actin filament bundle assembly	6	2	0.47	279	0.07304	0.07304
GO:0040019	positive regulation of embryonic development	6	2	0.47	280	0.07304	0.07304
GO:0045678	positive regulation of R7 cell differentiation	6	2	0.47	281	0.07304	0.07304
GO:0046680	response to DDT	6	2	0.47	282	0.07304	0.07304
GO:0051255	spindle midzone assembly	6	2	0.47	283	0.07304	0.07304
GO:1900087	positive regulation of G1/S transition of mitotic cell cycle	6	2	0.47	284	0.07304	0.07304
GO:0006401	RNA catabolic process	83	6	6.44	1339	0.6314	0.0735
GO:0007527	adult somatic muscle development	13	3	1.01	290	0.07395	0.07395
GO:0031145	anaphase-promoting complex-dependent catabolic process	13	3	1.01	291	0.07395	0.07395
GO:0001737	establishment of imaginal disc-derived wing hair orientation	21	4	1.63	294	0.07453	0.07453
GO:0046928	regulation of neurotransmitter secretion	21	4	1.63	295	0.07453	0.07453
GO:0044770	cell cycle phase transition	109	23	8.45	31	7.5e-06	0.07565
GO:0051053	negative regulation of DNA metabolic process	24	6	1.86	130	0.00852	0.0771
GO:0031577	spindle checkpoint	15	4	1.16	171	0.02452	0.07728
GO:2001251	negative regulation of chromosome organization	40	5	3.1	461	0.19513	0.07741
GO:0017143	insecticide metabolic process	6	2	0.47	285	0.07304	0.07746
GO:0006304	DNA modification	8	2	0.62	372	0.12306	0.07748
GO:0032185	septin cytoskeleton organization	8	2	0.62	373	0.12306	0.07748
GO:0048581	negative regulation of post-embryonic development	9	2	0.7	395	0.1504	0.07749
GO:0032970	regulation of actin filament-based process	89	8	6.9	798	0.38576	0.07752
GO:0046939	nucleotide phosphorylation	22	2	1.71	1078	0.51775	0.07763
GO:0043038	amino acid activation	41	3	3.18	1317	0.62647	0.0777
GO:0015672	monovalent inorganic cation transport	97	7	7.52	1340	0.6346	0.07775
GO:0051236	establishment of RNA localization	96	5	7.44	1922	0.87569	0.07801
GO:0022604	regulation of cell morphogenesis	115	6	8.92	1986	0.89086	0.07808
GO:0003008	system process	450	31	34.9	1695	0.78574	0.07825
GO:0009144	purine nucleoside triphosphate metabolic process	112	2	8.69	2506	0.99883	0.0786
GO:0006163	purine nucleotide metabolic process	152	4	11.79	2492	0.9981	0.07876
GO:0048858	cell projection morphogenesis	366	17	28.38	2442	0.99434	0.07932
GO:0042737	drug catabolic process	51	6	3.95	472	0.20049	0.08797
GO:0007094	mitotic spindle assembly checkpoint	14	3	1.09	311	0.0889	0.0889
GO:0042026	protein refolding	14	3	1.09	312	0.0889	0.0889
GO:2000134	negative regulation of G1/S transition of mitotic cell cycle	14	3	1.09	313	0.0889	0.0889
GO:0000070	mitotic sister chromatid segregation	96	27	7.44	17	1.9e-09	0.08939
GO:0090068	positive regulation of cell cycle process	33	8	2.56	87	0.00304	0.09594
GO:0033260	nuclear DNA replication	12	3	0.93	256	0.06024	0.09694
GO:0003383	apical constriction	17	3	1.32	386	0.14021	0.09706
GO:0007282	cystoblast division	17	3	1.32	387	0.14021	0.09706
GO:0006272	leading strand elongation	7	2	0.54	321	0.09713	0.09713
GO:0006273	lagging strand elongation	7	2	0.54	322	0.09713	0.09713
GO:0006348	chromatin silencing at telomere	7	2	0.54	323	0.09713	0.09713
GO:0006662	glycerol ether metabolic process	7	2	0.54	324	0.09713	0.09713
GO:0007060	male meiosis chromosome segregation	7	2	0.54	325	0.09713	0.09713
GO:0007141	male meiosis I	7	2	0.54	326	0.09713	0.09713
GO:0007288	sperm axoneme assembly	7	2	0.54	327	0.09713	0.09713
GO:0031034	myosin filament assembly	7	2	0.54	328	0.09713	0.09713
GO:0035335	peptidyl-tyrosine dephosphorylation	7	2	0.54	329	0.09713	0.09713
GO:0045835	negative regulation of meiotic nuclear division	7	2	0.54	330	0.09713	0.09713
GO:0045842	positive regulation of mitotic metaphase/anaphase transition	7	2	0.54	331	0.09713	0.09713
GO:0071218	cellular response to misfolded protein	7	2	0.54	332	0.09713	0.09713
GO:0080009	mRNA methylation	7	2	0.54	333	0.09713	0.09713
GO:0032006	regulation of TOR signaling	41	3	3.18	1318	0.62647	0.09762
GO:0003333	amino acid transmembrane transport	32	5	2.48	344	0.09765	0.09765
GO:0045214	sarcomere organization	32	5	2.48	345	0.09765	0.09765
GO:0043486	histone exchange	23	4	1.78	347	0.09775	0.09775
GO:0045595	regulation of cell differentiation	290	19	22.49	1751	0.8128	0.09866
GO:0016063	rhodopsin biosynthetic process	15	3	1.16	352	0.105	0.105
GO:0048132	female germ-line stem cell asymmetric division	15	3	1.16	353	0.105	0.105
GO:0023052	signaling	1426	84	110.58	2509	0.99895	0.10766
GO:0008283	cell proliferation	305	21	23.65	1599	0.7499	0.11622
GO:0008258	head involution	34	5	2.64	362	0.11919	0.11919
GO:2000027	regulation of organ morphogenesis	75	11	5.82	184	0.02883	0.12165
GO:0070507	regulation of microtubule cytoskeleton organization	40	8	3.1	138	0.01042	0.12176
GO:2000736	regulation of stem cell differentiation	26	4	2.02	383	0.13799	0.12203
GO:0035025	positive regulation of Rho protein signal transduction	16	3	1.24	363	0.12214	0.12214
GO:0051642	centrosome localization	16	3	1.24	364	0.12214	0.12214
GO:0009794	regulation of mitotic cell cycle, embryonic	14	4	1.09	162	0.01913	0.12249
GO:0010529	negative regulation of transposition	14	3	1.09	314	0.0889	0.12286
GO:0006544	glycine metabolic process	8	2	0.62	374	0.12306	0.12306
GO:0033314	mitotic DNA replication checkpoint	8	2	0.62	375	0.12306	0.12306
GO:0042135	neurotransmitter catabolic process	8	2	0.62	376	0.12306	0.12306
GO:0045035	sensory organ precursor cell division	8	2	0.62	377	0.12306	0.12306
GO:0048096	chromatin-mediated maintenance of transcription	8	2	0.62	378	0.12306	0.12306
GO:0007277	pole cell development	28	3	2.17	708	0.37138	0.12326
GO:0030951	establishment or maintenance of microtubule cytoskeleton polarity	40	3	3.1	1266	0.6095	0.1236
GO:0090090	negative regulation of canonical Wnt signaling pathway	25	4	1.94	382	0.12391	0.12391
GO:0007369	gastrulation	64	4	4.96	1567	0.74219	0.12392
GO:0006811	ion transport	377	28	29.23	1316	0.62573	0.12406
GO:0007346	regulation of mitotic cell cycle	172	38	13.34	18	2e-09	0.12573
GO:0060271	cilium assembly	42	7	3.26	213	0.04072	0.13909
GO:0009996	negative regulation of cell fate specification	17	3	1.32	388	0.14021	0.14021
GO:0035019	somatic stem cell population maintenance	17	3	1.32	389	0.14021	0.14021
GO:0042136	neurotransmitter biosynthetic process	17	3	1.32	390	0.14021	0.14021
GO:0007017	microtubule-based process	322	43	24.97	46	0.00027	0.14284
GO:0010564	regulation of cell cycle process	143	35	11.09	14	4.8e-10	0.14313
GO:0000075	cell cycle checkpoint	58	15	4.5	35	2.4e-05	0.14662
GO:2000113	negative regulation of cellular macromolecule biosynthetic process	353	36	27.37	246	0.05273	0.14702
GO:0030154	cell differentiation	1361	96	105.54	1919	0.87097	0.14718
GO:0045448	mitotic cell cycle, embryonic	37	10	2.87	49	0.00037	0.14786
GO:0033047	regulation of mitotic sister chromatid segregation	32	8	2.48	83	0.00246	0.1479
GO:0051303	establishment of chromosome localization	21	6	1.63	102	0.00419	0.14819
GO:0045862	positive regulation of proteolysis	49	8	3.8	192	0.03318	0.14823
GO:0042133	neurotransmitter metabolic process	27	6	2.09	152	0.01537	0.14831
GO:0008643	carbohydrate transport	20	5	1.55	156	0.01606	0.14843
GO:0010952	positive regulation of peptidase activity	24	5	1.86	195	0.0341	0.1485
GO:0051298	centrosome duplication	32	8	2.48	84	0.00246	0.14856
GO:0032231	regulation of actin filament bundle assembly	10	3	0.78	202	0.03688	0.14874
GO:0010458	exit from mitosis	12	3	0.93	257	0.06024	0.14878
GO:0009110	vitamin biosynthetic process	7	2	0.54	334	0.09713	0.14893
GO:0051098	regulation of binding	23	3	1.78	526	0.2623	0.14899
GO:0046364	monosaccharide biosynthetic process	11	2	0.85	475	0.20787	0.14901
GO:0070201	regulation of establishment of protein localization	50	5	3.88	679	0.34596	0.14902
GO:1903322	positive regulation of protein modification by small protein conjugation or removal	14	2	1.09	558	0.29682	0.14907
GO:0050772	positive regulation of axonogenesis	15	2	1.16	587	0.32633	0.14909
GO:1901616	organic hydroxy compound catabolic process	15	2	1.16	588	0.32633	0.14909
GO:0016180	snRNA processing	24	2	1.86	1174	0.56554	0.14927
GO:0071375	cellular response to peptide hormone stimulus	41	3	3.18	1319	0.62647	0.14935
GO:0008037	cell recognition	87	5	6.75	1755	0.81538	0.14975
GO:0002064	epithelial cell development	311	22	24.12	1503	0.70802	0.14987
GO:0006913	nucleocytoplasmic transport	109	6	8.45	1880	0.85927	0.14993
GO:0110020	regulation of actomyosin structure organization	15	3	1.16	354	0.105	0.15017
GO:0006312	mitotic recombination	9	2	0.7	396	0.1504	0.1504
GO:0006515	protein quality control for misfolded or incompletely synthesized proteins	9	2	0.7	397	0.1504	0.1504
GO:0006937	regulation of muscle contraction	9	2	0.7	398	0.1504	0.1504
GO:0043462	regulation of ATPase activity	9	2	0.7	399	0.1504	0.1504
GO:0060361	flight	9	2	0.7	400	0.1504	0.1504
GO:0060401	cytosolic calcium ion transport	9	2	0.7	401	0.1504	0.1504
GO:0035010	encapsulation of foreign target	36	4	2.79	571	0.304	0.15044
GO:0002682	regulation of immune system process	187	8	14.5	2346	0.98106	0.15099
GO:0030717	oocyte karyosome formation	27	4	2.09	407	0.15268	0.15268
GO:0007443	Malpighian tubule morphogenesis	37	5	2.87	411	0.15522	0.15522
GO:0007275	multicellular organism development	1822	140	141.29	1183	0.56896	0.15555
GO:0006491	N-glycan processing	18	3	1.4	417	0.15911	0.15911
GO:0031937	positive regulation of chromatin silencing	18	3	1.4	418	0.15911	0.15911
GO:0008284	positive regulation of cell proliferation	58	7	4.5	421	0.15988	0.15988
GO:0031146	SCF-dependent proteasomal ubiquitin-dependent protein catabolic process	38	5	2.95	425	0.16813	0.16813
GO:0006357	regulation of transcription by RNA polymerase II	530	39	41.1	1419	0.66335	0.17373
GO:0045893	positive regulation of transcription, DNA-templated	313	25	24.27	924	0.46924	0.17511
GO:0000022	mitotic spindle elongation	10	2	0.78	435	0.17878	0.17878
GO:0007096	regulation of exit from mitosis	10	2	0.78	436	0.17878	0.17878
GO:0019236	response to pheromone	10	2	0.78	437	0.17878	0.17878
GO:0042306	regulation of protein import into nucleus	10	2	0.78	438	0.17878	0.17878
GO:0042766	nucleosome mobilization	10	2	0.78	439	0.17878	0.17878
GO:0045737	positive regulation of cyclin-dependent protein serine/threonine kinase activity	10	2	0.78	440	0.17878	0.17878
GO:0046605	regulation of centrosome cycle	10	2	0.78	441	0.17878	0.17878
GO:0060326	cell chemotaxis	10	2	0.78	442	0.17878	0.17878
GO:0009116	nucleoside metabolic process	48	4	3.72	1063	0.51699	0.17926
GO:0009408	response to heat	67	6	5.2	834	0.41972	0.19619
GO:0015991	ATP hydrolysis coupled proton transport	20	3	1.55	466	0.19895	0.19895
GO:0005975	carbohydrate metabolic process	211	16	16.36	1191	0.57598	0.20631
GO:0010389	regulation of G2/M transition of mitotic cell cycle	28	6	2.17	159	0.01831	0.20635
GO:1903046	meiotic cell cycle process	175	36	13.57	23	4e-08	0.2073
GO:0035017	cuticle pattern formation	29	4	2.25	453	0.18368	0.20753
GO:0016055	Wnt signaling pathway	97	9	7.52	675	0.33772	0.20768
GO:0007110	meiosis I cytokinesis	11	2	0.85	476	0.20787	0.20787
GO:0042417	dopamine metabolic process	11	2	0.85	477	0.20787	0.20787
GO:0051663	oocyte nucleus localization involved in oocyte dorsal/ventral axis specification	11	2	0.85	478	0.20787	0.20787
GO:0060025	regulation of synaptic activity	11	2	0.85	479	0.20787	0.20787
GO:0031098	stress-activated protein kinase signaling cascade	79	6	6.13	1201	0.58246	0.2086
GO:0071897	DNA biosynthetic process	36	9	2.79	75	0.00134	0.21318
GO:0007091	metaphase/anaphase transition of mitotic cell cycle	30	7	2.33	117	0.00686	0.21372
GO:0090329	regulation of DNA-dependent DNA replication	15	5	1.16	103	0.0043	0.21401
GO:0051647	nucleus localization	38	6	2.95	273	0.07002	0.21428
GO:0007144	female meiosis I	8	3	0.62	166	0.01933	0.21452
GO:1903321	negative regulation of protein modification by small protein conjugation or removal	9	3	0.7	180	0.02736	0.21455
GO:0030952	establishment or maintenance of cytoskeleton polarity	49	5	3.8	598	0.33019	0.21494
GO:0031445	regulation of heterochromatin assembly	11	2	0.85	480	0.20787	0.21496
GO:0002118	aggressive behavior	12	2	0.93	498	0.2374	0.21498
GO:1903364	positive regulation of cellular protein catabolic process	26	3	2.02	596	0.3277	0.21501
GO:0009566	fertilization	30	3	2.33	827	0.4145	0.21512
GO:0015918	sterol transport	20	2	1.55	914	0.46659	0.2152
GO:0060810	intracellular mRNA localization involved in pattern specification process	61	5	4.73	1061	0.51693	0.21526
GO:0060537	muscle tissue development	25	2	1.94	1207	0.58813	0.21534
GO:0042278	purine nucleoside metabolic process	27	2	2.09	1331	0.63065	0.21539
GO:0008610	lipid biosynthetic process	167	11	12.95	1617	0.75731	0.21606
GO:0006099	tricarboxylic acid cycle	31	4	2.4	487	0.21651	0.21651
GO:0008219	cell death	318	21	24.66	1750	0.81235	0.21671
GO:0007266	Rho protein signal transduction	51	6	3.95	473	0.20049	0.21917
GO:0048666	neuron development	512	23	39.7	2518	0.99918	0.22164
GO:0000226	microtubule cytoskeleton organization	263	35	20.39	67	0.00105	0.22957
GO:0016476	regulation of embryonic cell shape	23	3	1.78	527	0.2623	0.23731
GO:0006298	mismatch repair	12	2	0.93	499	0.2374	0.2374
GO:0034587	piRNA metabolic process	12	2	0.93	500	0.2374	0.2374
GO:0035234	ectopic germ cell programmed cell death	12	2	0.93	501	0.2374	0.2374
GO:0043001	Golgi to plasma membrane protein transport	12	2	0.93	502	0.2374	0.2374
GO:1905515	non-motile cilium assembly	12	2	0.93	503	0.2374	0.2374
GO:0090305	nucleic acid phosphodiester bond hydrolysis	69	4	5.35	1708	0.79353	0.23893
GO:0070868	heterochromatin organization involved in chromatin silencing	22	3	1.71	513	0.24084	0.24084
GO:0008152	metabolic process	4473	323	346.86	2369	0.98533	0.25737
GO:0055114	oxidation-reduction process	433	32	33.58	1343	0.64239	0.25986
GO:1902476	chloride transmembrane transport	23	3	1.78	528	0.2623	0.2623
GO:0006139	nucleobase-containing compound metabolic process	1946	174	150.9	147	0.01346	0.26277
GO:0006517	protein deglycosylation	13	2	1.01	533	0.26712	0.26712
GO:0030720	oocyte localization involved in germarium-derived egg chamber formation	13	2	1.01	534	0.26712	0.26712
GO:0035065	regulation of histone acetylation	13	2	1.01	535	0.26712	0.26712
GO:0046427	positive regulation of JAK-STAT cascade	13	2	1.01	536	0.26712	0.26712
GO:0042594	response to starvation	109	8	8.45	1278	0.61732	0.27052
GO:0061982	meiosis I cell cycle process	86	19	6.67	34	2.3e-05	0.2709
GO:0006333	chromatin assembly or disassembly	47	9	3.64	135	0.00903	0.27396
GO:0006301	postreplication repair	11	4	0.85	120	0.0076	0.27492
GO:0051307	meiotic chromosome separation	11	4	0.85	121	0.0076	0.27492
GO:0046785	microtubule polymerization	20	3	1.55	467	0.19895	0.27565
GO:1905330	regulation of morphogenesis of an epithelium	20	3	1.55	468	0.19895	0.27565
GO:0042440	pigment metabolic process	111	10	8.61	698	0.35835	0.27567
GO:0007135	meiosis II	9	2	0.7	402	0.1504	0.27572
GO:0009113	purine nucleobase biosynthetic process	9	2	0.7	403	0.1504	0.27572
GO:0034644	cellular response to UV	9	2	0.7	404	0.1504	0.27572
GO:0000002	mitochondrial genome maintenance	10	2	0.78	443	0.17878	0.27575
GO:0070988	demethylation	12	2	0.93	504	0.2374	0.27582
GO:0007019	microtubule depolymerization	17	2	1.32	788	0.3842	0.27598
GO:0030705	cytoskeleton-dependent intracellular transport	56	5	4.34	901	0.44059	0.27599
GO:0008652	cellular amino acid biosynthetic process	41	3	3.18	1320	0.62647	0.27636
GO:0022410	circadian sleep/wake cycle process	29	2	2.25	1428	0.66967	0.27638
GO:0010468	regulation of gene expression	1188	100	92.12	460	0.19017	0.2766
GO:0030004	cellular monovalent inorganic cation homeostasis	37	2	2.87	1705	0.79333	0.27665
GO:0034504	protein localization to nucleus	63	4	4.89	1548	0.73084	0.27666
GO:0033993	response to lipid	64	4	4.96	1568	0.74219	0.2767
GO:0048024	regulation of mRNA splicing, via spliceosome	78	5	6.05	1554	0.73369	0.27674
GO:0050801	ion homeostasis	134	8	10.39	1789	0.82624	0.27733
GO:0015031	protein transport	379	12	29.39	2551	0.99996	0.28034
GO:0007010	cytoskeleton organization	500	60	38.77	48	0.00035	0.28083
GO:0006342	chromatin silencing	99	12	7.68	299	0.08012	0.28272
GO:0036335	intestinal stem cell homeostasis	24	3	1.86	552	0.28399	0.28399
GO:0043043	peptide biosynthetic process	431	13	33.42	2560	0.99999	0.28558
GO:0050829	defense response to Gram-negative bacterium	82	8	6.36	570	0.30219	0.2859
GO:0017148	negative regulation of translation	73	6	5.66	1018	0.50343	0.28712
GO:0006182	cGMP biosynthetic process	14	2	1.09	559	0.29682	0.29682
GO:0007464	R3/R4 cell fate commitment	14	2	1.09	560	0.29682	0.29682
GO:0060322	head development	108	6	8.37	1850	0.85333	0.29927
GO:0007059	chromosome segregation	170	47	13.18	4	3e-15	0.29992
GO:0007507	heart development	88	8	6.82	716	0.37367	0.30403
GO:0000278	mitotic cell cycle	419	73	32.49	10	1.5e-11	0.31097
GO:0030431	sleep	62	5	4.81	1097	0.53169	0.32314
GO:0045165	cell fate commitment	261	22	20.24	715	0.37255	0.32558
GO:0006874	cellular calcium ion homeostasis	38	4	2.95	676	0.34013	0.32616
GO:0007629	flight behavior	15	2	1.16	589	0.32633	0.32633
GO:0051091	positive regulation of DNA binding transcription factor activity	15	2	1.16	590	0.32633	0.32633
GO:0051304	chromosome separation	49	15	3.8	29	2.4e-06	0.32685
GO:0045930	negative regulation of mitotic cell cycle	62	14	4.81	44	0.00022	0.32785
GO:0010948	negative regulation of cell cycle process	60	13	4.65	56	0.00055	0.32828
GO:0007265	Ras protein signal transduction	185	10	14.35	2081	0.91749	0.33048
GO:0030071	regulation of mitotic metaphase/anaphase transition	27	6	2.09	153	0.01537	0.33051
GO:0016999	antibiotic metabolic process	47	6	3.64	410	0.15357	0.33128
GO:0030317	flagellated sperm motility	12	3	0.93	258	0.06024	0.33143
GO:0030706	germarium-derived oocyte differentiation	33	4	2.56	521	0.25078	0.33174
GO:0045910	negative regulation of DNA recombination	11	2	0.85	481	0.20787	0.33189
GO:0051438	regulation of ubiquitin-protein transferase activity	11	2	0.85	482	0.20787	0.33189
GO:0060968	regulation of gene silencing	69	6	5.35	907	0.44796	0.33214
GO:0000467	exonucleolytic trimming to generate mature 3'-end of 5.8S rRNA from tricistronic rRNA transcript (SS...	5	1	0.39	601	0.33215	0.33215
GO:0001678	cellular glucose homeostasis	5	1	0.39	602	0.33215	0.33215
GO:0001706	endoderm formation	5	1	0.39	603	0.33215	0.33215
GO:0002701	negative regulation of production of molecular mediator of immune response	5	1	0.39	604	0.33215	0.33215
GO:0006265	DNA topological change	5	1	0.39	605	0.33215	0.33215
GO:0006563	L-serine metabolic process	5	1	0.39	606	0.33215	0.33215
GO:0006677	glycosylceramide metabolic process	5	1	0.39	607	0.33215	0.33215
GO:0007004	telomere maintenance via telomerase	5	1	0.39	608	0.33215	0.33215
GO:0007053	spindle assembly involved in male meiosis	5	1	0.39	609	0.33215	0.33215
GO:0007415	defasciculation of motor neuron axon	5	1	0.39	610	0.33215	0.33215
GO:0007604	phototransduction, UV	5	1	0.39	611	0.33215	0.33215
GO:0009301	snRNA transcription	5	1	0.39	612	0.33215	0.33215
GO:0010171	body morphogenesis	5	1	0.39	613	0.33215	0.33215
GO:0015014	heparan sulfate proteoglycan biosynthetic process, polysaccharide chain biosynthetic process	5	1	0.39	614	0.33215	0.33215
GO:0016926	protein desumoylation	5	1	0.39	615	0.33215	0.33215
GO:0019320	hexose catabolic process	5	1	0.39	616	0.33215	0.33215
GO:0022600	digestive system process	5	1	0.39	617	0.33215	0.33215
GO:0030037	actin filament reorganization involved in cell cycle	5	1	0.39	618	0.33215	0.33215
GO:0030423	targeting of mRNA for destruction involved in RNA interference	5	1	0.39	619	0.33215	0.33215
GO:0030702	chromatin silencing at centromere	5	1	0.39	620	0.33215	0.33215
GO:0031112	positive regulation of microtubule polymerization or depolymerization	5	1	0.39	621	0.33215	0.33215
GO:0031113	regulation of microtubule polymerization	5	1	0.39	622	0.33215	0.33215
GO:0034284	response to monosaccharide	5	1	0.39	623	0.33215	0.33215
GO:0035721	intraciliary retrograde transport	5	1	0.39	624	0.33215	0.33215
GO:0035736	cell proliferation involved in compound eye morphogenesis	5	1	0.39	625	0.33215	0.33215
GO:0042364	water-soluble vitamin biosynthetic process	5	1	0.39	626	0.33215	0.33215
GO:0042423	catecholamine biosynthetic process	5	1	0.39	627	0.33215	0.33215
GO:0042688	crystal cell differentiation	5	1	0.39	628	0.33215	0.33215
GO:0043096	purine nucleobase salvage	5	1	0.39	629	0.33215	0.33215
GO:0043243	positive regulation of protein complex disassembly	5	1	0.39	630	0.33215	0.33215
GO:0044771	meiotic cell cycle phase transition	5	1	0.39	631	0.33215	0.33215
GO:0045943	positive regulation of transcription by RNA polymerase I	5	1	0.39	632	0.33215	0.33215
GO:0046701	insecticide catabolic process	5	1	0.39	633	0.33215	0.33215
GO:0048383	mesectoderm development	5	1	0.39	634	0.33215	0.33215
GO:0048521	negative regulation of behavior	5	1	0.39	635	0.33215	0.33215
GO:0048644	muscle organ morphogenesis	5	1	0.39	636	0.33215	0.33215
GO:0051177	meiotic sister chromatid cohesion	5	1	0.39	637	0.33215	0.33215
GO:0051282	regulation of sequestering of calcium ion	5	1	0.39	638	0.33215	0.33215
GO:0051289	protein homotetramerization	5	1	0.39	639	0.33215	0.33215
GO:0051339	regulation of lyase activity	5	1	0.39	640	0.33215	0.33215
GO:0051418	microtubule nucleation by microtubule organizing center	5	1	0.39	641	0.33215	0.33215
GO:0051780	behavioral response to nutrient	5	1	0.39	642	0.33215	0.33215
GO:0051791	medium-chain fatty acid metabolic process	5	1	0.39	643	0.33215	0.33215
GO:0051928	positive regulation of calcium ion transport	5	1	0.39	644	0.33215	0.33215
GO:0061088	regulation of sequestering of zinc ion	5	1	0.39	645	0.33215	0.33215
GO:0070873	regulation of glycogen metabolic process	5	1	0.39	646	0.33215	0.33215
GO:0071046	nuclear polyadenylation-dependent ncRNA catabolic process	5	1	0.39	647	0.33215	0.33215
GO:0071222	cellular response to lipopolysaccharide	5	1	0.39	648	0.33215	0.33215
GO:0071260	cellular response to mechanical stimulus	5	1	0.39	649	0.33215	0.33215
GO:0097374	sensory neuron axon guidance	5	1	0.39	650	0.33215	0.33215
GO:0097384	cellular lipid biosynthetic process	5	1	0.39	651	0.33215	0.33215
GO:0098700	neurotransmitter loading into synaptic vesicle	5	1	0.39	652	0.33215	0.33215
GO:1900373	positive regulation of purine nucleotide biosynthetic process	5	1	0.39	653	0.33215	0.33215
GO:1901096	regulation of autophagosome maturation	5	1	0.39	654	0.33215	0.33215
GO:1902969	mitotic DNA replication	5	1	0.39	655	0.33215	0.33215
GO:2000677	regulation of transcription regulatory region DNA binding	5	1	0.39	656	0.33215	0.33215
GO:0007188	adenylate cyclase-modulating G-protein coupled receptor signaling pathway	31	3	2.4	895	0.43571	0.33216
GO:0010941	regulation of cell death	228	17	17.68	1264	0.60487	0.33282
GO:0009156	ribonucleoside monophosphate biosynthetic process	50	2	3.88	2045	0.90881	0.3334
GO:0009314	response to radiation	168	9	13.03	2063	0.91299	0.33451
GO:0009888	tissue development	860	59	66.69	1918	0.86769	0.33682
GO:0000122	negative regulation of transcription by RNA polymerase II	134	12	10.39	678	0.34466	0.34466
GO:0006506	GPI anchor biosynthetic process	27	3	2.09	685	0.34958	0.34958
GO:0045892	negative regulation of transcription, DNA-templated	277	28	21.48	307	0.08748	0.35372
GO:0051260	protein homooligomerization	21	3	1.63	490	0.21969	0.35499
GO:0008298	intracellular mRNA localization	77	7	5.97	800	0.38866	0.35527
GO:0090175	regulation of establishment of planar polarity	16	2	1.24	691	0.3555	0.3555
GO:0033674	positive regulation of kinase activity	70	6	5.43	912	0.46198	0.35565
GO:0055085	transmembrane transport	447	37	34.66	700	0.36119	0.35675
GO:0030163	protein catabolic process	258	19	20.01	1330	0.62908	0.35701
GO:0007525	somatic muscle development	65	7	5.04	497	0.23714	0.37015
GO:0051321	meiotic cell cycle	184	38	14.27	22	1.5e-08	0.37081
GO:0007294	germarium-derived oocyte fate determination	28	3	2.17	709	0.37138	0.37138
GO:0045132	meiotic chromosome segregation	63	18	4.89	25	7.5e-07	0.37698
GO:0042981	regulation of apoptotic process	180	14	13.96	1102	0.53645	0.37752
GO:0031023	microtubule organizing center organization	72	13	5.58	91	0.00321	0.38015
GO:0051493	regulation of cytoskeleton organization	133	16	10.31	243	0.05136	0.38109
GO:0000086	G2/M transition of mitotic cell cycle	34	7	2.64	148	0.01384	0.38186
GO:0010638	positive regulation of organelle organization	125	12	9.69	525	0.2616	0.38278
GO:0006805	xenobiotic metabolic process	12	3	0.93	259	0.06024	0.38313
GO:0042675	compound eye cone cell differentiation	16	3	1.24	365	0.12214	0.3833
GO:0007584	response to nutrient	11	2	0.85	483	0.20787	0.38364
GO:0072523	purine-containing compound catabolic process	15	2	1.16	591	0.32633	0.38381
GO:0050919	negative chemotaxis	16	2	1.24	692	0.3555	0.38385
GO:0000335	negative regulation of transposition, DNA-mediated	6	1	0.47	732	0.38398	0.38398
GO:0000729	DNA double-strand break processing	6	1	0.47	733	0.38398	0.38398
GO:0006012	galactose metabolic process	6	1	0.47	734	0.38398	0.38398
GO:0006013	mannose metabolic process	6	1	0.47	735	0.38398	0.38398
GO:0006264	mitochondrial DNA replication	6	1	0.47	736	0.38398	0.38398
GO:0006655	phosphatidylglycerol biosynthetic process	6	1	0.47	737	0.38398	0.38398
GO:0009303	rRNA transcription	6	1	0.47	738	0.38398	0.38398
GO:0009394	2'-deoxyribonucleotide metabolic process	6	1	0.47	739	0.38398	0.38398
GO:0010586	miRNA metabolic process	6	1	0.47	740	0.38398	0.38398
GO:0016114	terpenoid biosynthetic process	6	1	0.47	741	0.38398	0.38398
GO:0030728	ovulation	6	1	0.47	742	0.38398	0.38398
GO:0030950	establishment or maintenance of actin cytoskeleton polarity	6	1	0.47	743	0.38398	0.38398
GO:0031990	mRNA export from nucleus in response to heat stress	6	1	0.47	744	0.38398	0.38398
GO:0032785	negative regulation of DNA-templated transcription, elongation	6	1	0.47	745	0.38398	0.38398
GO:0032875	regulation of DNA endoreduplication	6	1	0.47	746	0.38398	0.38398
GO:0034629	cellular protein-containing complex localization	6	1	0.47	747	0.38398	0.38398
GO:0036065	fucosylation	6	1	0.47	748	0.38398	0.38398
GO:0038203	TORC2 signaling	6	1	0.47	749	0.38398	0.38398
GO:0043266	regulation of potassium ion transport	6	1	0.47	750	0.38398	0.38398
GO:0043392	negative regulation of DNA binding	6	1	0.47	751	0.38398	0.38398
GO:0043393	regulation of protein binding	6	1	0.47	752	0.38398	0.38398
GO:0043519	regulation of myosin II filament organization	6	1	0.47	753	0.38398	0.38398
GO:0043649	dicarboxylic acid catabolic process	6	1	0.47	754	0.38398	0.38398
GO:0044036	cell wall macromolecule metabolic process	6	1	0.47	755	0.38398	0.38398
GO:0046085	adenosine metabolic process	6	1	0.47	756	0.38398	0.38398
GO:0048133	male germ-line stem cell asymmetric division	6	1	0.47	757	0.38398	0.38398
GO:0048841	regulation of axon extension involved in axon guidance	6	1	0.47	758	0.38398	0.38398
GO:0050764	regulation of phagocytosis	6	1	0.47	759	0.38398	0.38398
GO:0051205	protein insertion into membrane	6	1	0.47	760	0.38398	0.38398
GO:0051224	negative regulation of protein transport	6	1	0.47	761	0.38398	0.38398
GO:0051443	positive regulation of ubiquitin-protein transferase activity	6	1	0.47	762	0.38398	0.38398
GO:0051492	regulation of stress fiber assembly	6	1	0.47	763	0.38398	0.38398
GO:0051781	positive regulation of cell division	6	1	0.47	764	0.38398	0.38398
GO:0051881	regulation of mitochondrial membrane potential	6	1	0.47	765	0.38398	0.38398
GO:0055078	sodium ion homeostasis	6	1	0.47	766	0.38398	0.38398
GO:0097320	plasma membrane tubulation	6	1	0.47	767	0.38398	0.38398
GO:1901216	positive regulation of neuron death	6	1	0.47	768	0.38398	0.38398
GO:1903078	positive regulation of protein localization to plasma membrane	6	1	0.47	769	0.38398	0.38398
GO:2000105	positive regulation of DNA-dependent DNA replication	6	1	0.47	770	0.38398	0.38398
GO:2000253	positive regulation of feeding behavior	6	1	0.47	771	0.38398	0.38398
GO:0043410	positive regulation of MAPK cascade	85	7	6.59	995	0.49202	0.38405
GO:0051294	establishment of spindle orientation	22	2	1.71	1079	0.51775	0.38411
GO:0032507	maintenance of protein location in cell	29	3	2.25	804	0.39304	0.38414
GO:0007307	eggshell chorion gene amplification	17	2	1.32	789	0.3842	0.3842
GO:0097194	execution phase of apoptosis	17	2	1.32	790	0.3842	0.3842
GO:0042067	establishment of ommatidial planar polarity	50	4	3.88	1122	0.54991	0.38469
GO:0045927	positive regulation of growth	91	6	7.06	1507	0.71851	0.38486
GO:0006366	transcription by RNA polymerase II	566	41	43.89	1501	0.70578	0.38754
GO:1901575	organic substance catabolic process	633	43	49.09	1844	0.84746	0.38795
GO:0007268	chemical synaptic transmission	234	12	18.15	2228	0.95746	0.38821
GO:0061077	chaperone-mediated protein folding	41	4	3.18	808	0.39448	0.39448
GO:0006468	protein phosphorylation	370	28	28.69	1204	0.58456	0.40128
GO:0007143	female meiotic nuclear division	62	14	4.81	45	0.00022	0.40459
GO:0042078	germ-line stem cell division	37	6	2.87	265	0.06289	0.41007
GO:0032436	positive regulation of proteasomal ubiquitin-dependent protein catabolic process	18	2	1.4	818	0.41234	0.41234
GO:0035293	chitin-based larval cuticle pattern formation	18	2	1.4	819	0.41234	0.41234
GO:0044719	regulation of imaginal disc-derived wing size	18	2	1.4	820	0.41234	0.41234
GO:0046529	imaginal disc fusion, thorax closure	18	2	1.4	821	0.41234	0.41234
GO:0007608	sensory perception of smell	42	4	3.26	825	0.41247	0.41247
GO:0007367	segment polarity determination	30	3	2.33	828	0.4145	0.4145
GO:0003012	muscle system process	32	7	2.48	136	0.00991	0.42937
GO:0008156	negative regulation of DNA replication	13	4	1.01	150	0.01453	0.43029
GO:0048519	negative regulation of biological process	1129	90	87.55	814	0.40234	0.43042
GO:0043280	positive regulation of cysteine-type endopeptidase activity involved in apoptotic process	18	4	1.4	215	0.04572	0.43051
GO:0007056	spindle assembly involved in female meiosis	12	3	0.93	260	0.06024	0.43083
GO:0048580	regulation of post-embryonic development	16	3	1.24	366	0.12214	0.43102
GO:0000079	regulation of cyclin-dependent protein serine/threonine kinase activity	17	3	1.32	391	0.14021	0.43106
GO:0001738	morphogenesis of a polarized epithelium	100	9	7.75	714	0.37142	0.43132
GO:0051345	positive regulation of hydrolase activity	88	8	6.82	717	0.37367	0.43136
GO:0043467	regulation of generation of precursor metabolites and energy	12	2	0.93	505	0.2374	0.43142
GO:0006875	cellular metal ion homeostasis	69	6	5.35	908	0.44796	0.43167
GO:0006011	UDP-glucose metabolic process	7	1	0.54	839	0.43179	0.43179
GO:0006044	N-acetylglucosamine metabolic process	7	1	0.54	840	0.43179	0.43179
GO:0006303	double-strand break repair via nonhomologous end joining	7	1	0.54	841	0.43179	0.43179
GO:0006398	mRNA 3'-end processing by stem-loop binding and cleavage	7	1	0.54	842	0.43179	0.43179
GO:0006541	glutamine metabolic process	7	1	0.54	843	0.43179	0.43179
GO:0007050	cell cycle arrest	7	1	0.54	844	0.43179	0.43179
GO:0007311	maternal specification of dorsal/ventral axis, oocyte, germ-line encoded	7	1	0.54	845	0.43179	0.43179
GO:0007516	hemocyte development	7	1	0.54	846	0.43179	0.43179
GO:0009068	aspartate family amino acid catabolic process	7	1	0.54	847	0.43179	0.43179
GO:0009130	pyrimidine nucleoside monophosphate biosynthetic process	7	1	0.54	848	0.43179	0.43179
GO:0009220	pyrimidine ribonucleotide biosynthetic process	7	1	0.54	849	0.43179	0.43179
GO:0009263	deoxyribonucleotide biosynthetic process	7	1	0.54	850	0.43179	0.43179
GO:0010884	positive regulation of lipid storage	7	1	0.54	851	0.43179	0.43179
GO:0015800	acidic amino acid transport	7	1	0.54	852	0.43179	0.43179
GO:0016204	determination of muscle attachment site	7	1	0.54	853	0.43179	0.43179
GO:0019934	cGMP-mediated signaling	7	1	0.54	854	0.43179	0.43179
GO:0021551	central nervous system morphogenesis	7	1	0.54	855	0.43179	0.43179
GO:0031106	septin ring organization	7	1	0.54	856	0.43179	0.43179
GO:0032414	positive regulation of ion transmembrane transporter activity	7	1	0.54	857	0.43179	0.43179
GO:0035176	social behavior	7	1	0.54	858	0.43179	0.43179
GO:0035190	syncytial nuclear migration	7	1	0.54	859	0.43179	0.43179
GO:0042401	cellular biogenic amine biosynthetic process	7	1	0.54	860	0.43179	0.43179
GO:0042595	behavioral response to starvation	7	1	0.54	861	0.43179	0.43179
GO:0044728	DNA methylation or demethylation	7	1	0.54	862	0.43179	0.43179
GO:0046130	purine ribonucleoside catabolic process	7	1	0.54	863	0.43179	0.43179
GO:0046664	dorsal closure, amnioserosa morphology change	7	1	0.54	864	0.43179	0.43179
GO:0046672	positive regulation of compound eye retinal cell programmed cell death	7	1	0.54	865	0.43179	0.43179
GO:0048567	ectodermal digestive tract morphogenesis	7	1	0.54	866	0.43179	0.43179
GO:0048791	calcium ion-regulated exocytosis of neurotransmitter	7	1	0.54	867	0.43179	0.43179
GO:0061357	positive regulation of Wnt protein secretion	7	1	0.54	868	0.43179	0.43179
GO:0070076	histone lysine demethylation	7	1	0.54	869	0.43179	0.43179
GO:0070193	synaptonemal complex organization	7	1	0.54	870	0.43179	0.43179
GO:1901019	regulation of calcium ion transmembrane transporter activity	7	1	0.54	871	0.43179	0.43179
GO:1903828	negative regulation of cellular protein localization	7	1	0.54	872	0.43179	0.43179
GO:0034637	cellular carbohydrate biosynthetic process	23	2	1.78	1108	0.54208	0.43193
GO:0042749	regulation of circadian sleep/wake cycle	30	2	2.33	1461	0.6879	0.43225
GO:0035088	establishment or maintenance of apical/basal cell polarity	35	2	2.71	1658	0.76693	0.43248
GO:0006302	double-strand break repair	69	13	5.35	80	0.00216	0.43319
GO:0071695	anatomical structure maturation	56	2	4.34	2158	0.93854	0.43345
GO:0001932	regulation of protein phosphorylation	213	13	16.52	1849	0.8531	0.4342
GO:0002009	morphogenesis of an epithelium	481	30	37.3	2097	0.91894	0.43668
GO:0007165	signal transduction	1242	70	96.31	2528	0.99939	0.43692
GO:0009612	response to mechanical stimulus	24	3	1.86	553	0.28399	0.43926
GO:0008362	chitin-based embryonic cuticle biosynthetic process	19	2	1.47	898	0.43982	0.43982
GO:0043967	histone H4 acetylation	19	2	1.47	899	0.43982	0.43982
GO:0045792	negative regulation of cell size	19	2	1.47	900	0.43982	0.43982
GO:0007283	spermatogenesis	153	13	11.86	815	0.40755	0.43993
GO:0007420	brain development	94	4	7.29	2163	0.94062	0.44026
GO:0006793	phosphorus metabolic process	857	50	66.46	2415	0.99129	0.44302
GO:0048583	regulation of response to stimulus	818	43	63.43	2505	0.99881	0.44555
GO:0048749	compound eye development	304	24	23.57	1004	0.49509	0.4564
GO:0006396	RNA processing	524	20	40.63	2550	0.99995	0.46062
GO:0030162	regulation of proteolysis	105	11	8.14	459	0.18915	0.46428
GO:0007398	ectoderm development	25	3	1.94	574	0.30581	0.46601
GO:0007280	pole cell migration	20	2	1.55	915	0.46659	0.46659
GO:0007390	germ-band shortening	20	2	1.55	916	0.46659	0.46659
GO:0042331	phototaxis	20	2	1.55	917	0.46659	0.46659
GO:0042752	regulation of circadian rhythm	62	4	4.81	1508	0.71912	0.46778
GO:0048522	positive regulation of cellular process	1032	83	80.03	721	0.37368	0.47404
GO:0070192	chromosome organization involved in meiotic cell cycle	40	6	3.1	303	0.08563	0.47431
GO:0035082	axoneme assembly	15	3	1.16	355	0.105	0.47498
GO:0000916	actomyosin contractile ring contraction	8	1	0.62	930	0.47589	0.47589
GO:0006071	glycerol metabolic process	8	1	0.62	931	0.47589	0.47589
GO:0007319	negative regulation of oskar mRNA translation	8	1	0.62	932	0.47589	0.47589
GO:0007440	foregut morphogenesis	8	1	0.62	933	0.47589	0.47589
GO:0007458	progression of morphogenetic furrow involved in compound eye morphogenesis	8	1	0.62	934	0.47589	0.47589
GO:0008057	eye pigment granule organization	8	1	0.62	935	0.47589	0.47589
GO:0008343	adult feeding behavior	8	1	0.62	936	0.47589	0.47589
GO:0016578	histone deubiquitination	8	1	0.62	937	0.47589	0.47589
GO:0018410	C-terminal protein amino acid modification	8	1	0.62	938	0.47589	0.47589
GO:0031453	positive regulation of heterochromatin assembly	8	1	0.62	939	0.47589	0.47589
GO:0032387	negative regulation of intracellular transport	8	1	0.62	940	0.47589	0.47589
GO:0035204	negative regulation of lamellocyte differentiation	8	1	0.62	941	0.47589	0.47589
GO:0040013	negative regulation of locomotion	8	1	0.62	942	0.47589	0.47589
GO:0042438	melanin biosynthetic process	8	1	0.62	943	0.47589	0.47589
GO:0043144	snoRNA processing	8	1	0.62	944	0.47589	0.47589
GO:0045705	negative regulation of salivary gland boundary specification	8	1	0.62	945	0.47589	0.47589
GO:0048168	regulation of neuronal synaptic plasticity	8	1	0.62	946	0.47589	0.47589
GO:0048738	cardiac muscle tissue development	8	1	0.62	947	0.47589	0.47589
GO:0048935	peripheral nervous system neuron development	8	1	0.62	948	0.47589	0.47589
GO:0051899	membrane depolarization	8	1	0.62	949	0.47589	0.47589
GO:0055075	potassium ion homeostasis	8	1	0.62	950	0.47589	0.47589
GO:0060026	convergent extension	8	1	0.62	951	0.47589	0.47589
GO:0061028	establishment of endothelial barrier	8	1	0.62	952	0.47589	0.47589
GO:0072697	protein localization to cell cortex	8	1	0.62	953	0.47589	0.47589
GO:0097150	neuronal stem cell population maintenance	8	1	0.62	954	0.47589	0.47589
GO:0097254	renal tubular secretion	8	1	0.62	955	0.47589	0.47589
GO:1902669	positive regulation of axon guidance	8	1	0.62	956	0.47589	0.47589
GO:1903531	negative regulation of secretion by cell	8	1	0.62	957	0.47589	0.47589
GO:1904064	positive regulation of cation transmembrane transport	8	1	0.62	958	0.47589	0.47589
GO:2000369	regulation of clathrin-dependent endocytosis	8	1	0.62	959	0.47589	0.47589
GO:2001235	positive regulation of apoptotic signaling pathway	8	1	0.62	960	0.47589	0.47589
GO:0060811	intracellular mRNA localization involved in anterior/posterior axis specification	58	4	4.5	1427	0.66851	0.47644
GO:0043484	regulation of RNA splicing	86	6	6.67	1422	0.66582	0.47655
GO:0043069	negative regulation of programmed cell death	97	6	7.52	1669	0.77377	0.47709
GO:0006402	mRNA catabolic process	70	3	5.43	2075	0.91678	0.47765
GO:0046394	carboxylic acid biosynthetic process	100	5	7.75	2013	0.8966	0.47787
GO:0006979	response to oxidative stress	103	7	7.99	1472	0.69662	0.47851
GO:0040007	growth	385	20	29.85	2360	0.98303	0.48259
GO:0006974	cellular response to DNA damage stimulus	191	41	14.81	15	1.2e-09	0.49143
GO:0001558	regulation of cell growth	68	6	5.27	892	0.43387	0.49223
GO:0010038	response to metal ion	33	3	2.56	981	0.47722	0.49251
GO:0040018	positive regulation of multicellular organism growth	21	2	1.63	996	0.49258	0.49258
GO:0046330	positive regulation of JNK cascade	21	2	1.63	997	0.49258	0.49258
GO:0007264	small GTPase mediated signal transduction	212	12	16.44	2040	0.90591	0.49733
GO:0007291	sperm individualization	34	3	2.64	1006	0.49743	0.49743
GO:0046483	heterocycle metabolic process	2006	175	155.56	188	0.03266	0.49934
GO:0006310	DNA recombination	74	18	5.74	32	9.3e-06	0.50872
GO:0031327	negative regulation of cellular biosynthetic process	362	37	28.07	226	0.04869	0.51069
GO:0051726	regulation of cell cycle	268	53	20.78	13	1e-10	0.5136
GO:0051302	regulation of cell division	23	5	1.78	183	0.02877	0.51469
GO:0043085	positive regulation of catalytic activity	173	16	13.42	532	0.26616	0.51507
GO:0051299	centrosome separation	21	4	1.63	296	0.07453	0.51524
GO:0007219	Notch signaling pathway	117	11	9.07	568	0.29704	0.51613
GO:0007310	oocyte dorsal/ventral axis specification	40	5	3.1	462	0.19513	0.51618
GO:0006520	cellular amino acid metabolic process	145	12	11.24	909	0.45117	0.51628
GO:0000187	activation of MAPK activity	9	1	0.7	1022	0.51658	0.51658
GO:0002121	inter-male aggressive behavior	9	1	0.7	1023	0.51658	0.51658
GO:0006020	inositol metabolic process	9	1	0.7	1024	0.51658	0.51658
GO:0006094	gluconeogenesis	9	1	0.7	1025	0.51658	0.51658
GO:0008062	eclosion rhythm	9	1	0.7	1026	0.51658	0.51658
GO:0008089	anterograde axonal transport	9	1	0.7	1027	0.51658	0.51658
GO:0009086	methionine biosynthetic process	9	1	0.7	1028	0.51658	0.51658
GO:0010312	detoxification of zinc ion	9	1	0.7	1029	0.51658	0.51658
GO:0032508	DNA duplex unwinding	9	1	0.7	1030	0.51658	0.51658
GO:0045003	double-strand break repair via synthesis-dependent strand annealing	9	1	0.7	1031	0.51658	0.51658
GO:0045198	establishment of epithelial cell apical/basal polarity	9	1	0.7	1032	0.51658	0.51658
GO:0045314	regulation of compound eye photoreceptor development	9	1	0.7	1033	0.51658	0.51658
GO:0046479	glycosphingolipid catabolic process	9	1	0.7	1034	0.51658	0.51658
GO:0048100	wing disc anterior/posterior pattern formation	9	1	0.7	1035	0.51658	0.51658
GO:0070734	histone H3-K27 methylation	9	1	0.7	1036	0.51658	0.51658
GO:0071322	cellular response to carbohydrate stimulus	9	1	0.7	1037	0.51658	0.51658
GO:0090328	regulation of olfactory learning	9	1	0.7	1038	0.51658	0.51658
GO:1902117	positive regulation of organelle assembly	9	1	0.7	1039	0.51658	0.51658
GO:1902358	sulfate transmembrane transport	9	1	0.7	1040	0.51658	0.51658
GO:0019731	antibacterial humoral response	27	2	2.09	1332	0.63065	0.51683
GO:0051028	mRNA transport	42	3	3.26	1344	0.64293	0.51694
GO:0048149	behavioral response to ethanol	48	4	3.72	1064	0.51699	0.51699
GO:0045747	positive regulation of Notch signaling pathway	35	3	2.71	1068	0.51725	0.51725
GO:0008654	phospholipid biosynthetic process	68	6	5.27	893	0.43387	0.51733
GO:0015718	monocarboxylic acid transport	22	2	1.71	1080	0.51775	0.51775
GO:0061057	peptidoglycan recognition protein signaling pathway	22	2	1.71	1081	0.51775	0.51775
GO:0007626	locomotory behavior	144	8	11.17	1940	0.87973	0.51886
GO:0006836	neurotransmitter transport	107	7	8.3	1556	0.73395	0.51933
GO:0051241	negative regulation of multicellular organismal process	159	10	12.33	1710	0.79887	0.52051
GO:0044248	cellular catabolic process	696	43	53.97	2236	0.95961	0.52983
GO:0007419	ventral cord development	62	5	4.81	1098	0.53169	0.53169
GO:0006260	DNA replication	99	31	7.68	9	5.2e-12	0.53837
GO:0046777	protein autophosphorylation	37	3	2.87	1168	0.55557	0.54216
GO:0008049	male courtship behavior	41	3	3.18	1321	0.62647	0.54247
GO:0045995	regulation of embryonic development	74	10	5.74	254	0.05832	0.55141
GO:0051052	regulation of DNA metabolic process	62	9	4.81	224	0.04817	0.55146
GO:0006006	glucose metabolic process	29	3	2.25	805	0.39304	0.55376
GO:0006576	cellular biogenic amine metabolic process	17	2	1.32	791	0.3842	0.55381
GO:0030727	germarium-derived female germ-line cyst formation	20	2	1.55	918	0.46659	0.55396
GO:0002230	positive regulation of defense response to virus by host	10	1	0.78	1126	0.55411	0.55411
GO:0003384	apical constriction involved in gastrulation	10	1	0.78	1127	0.55411	0.55411
GO:0007026	negative regulation of microtubule depolymerization	10	1	0.78	1128	0.55411	0.55411
GO:0007615	anesthesia-resistant memory	10	1	0.78	1129	0.55411	0.55411
GO:0009070	serine family amino acid biosynthetic process	10	1	0.78	1130	0.55411	0.55411
GO:0009648	photoperiodism	10	1	0.78	1131	0.55411	0.55411
GO:0015695	organic cation transport	10	1	0.78	1132	0.55411	0.55411
GO:0016201	synaptic target inhibition	10	1	0.78	1133	0.55411	0.55411
GO:0017001	antibiotic catabolic process	10	1	0.78	1134	0.55411	0.55411
GO:0030322	stabilization of membrane potential	10	1	0.78	1135	0.55411	0.55411
GO:0030381	chorion-containing eggshell pattern formation	10	1	0.78	1136	0.55411	0.55411
GO:0030589	pseudocleavage involved in syncytial blastoderm formation	10	1	0.78	1137	0.55411	0.55411
GO:0030708	germarium-derived female germ-line cyst encapsulation	10	1	0.78	1138	0.55411	0.55411
GO:0030723	ovarian fusome organization	10	1	0.78	1139	0.55411	0.55411
GO:0031062	positive regulation of histone methylation	10	1	0.78	1140	0.55411	0.55411
GO:0040034	regulation of development, heterochronic	10	1	0.78	1141	0.55411	0.55411
GO:0042246	tissue regeneration	10	1	0.78	1142	0.55411	0.55411
GO:0043488	regulation of mRNA stability	10	1	0.78	1143	0.55411	0.55411
GO:0045292	mRNA cis splicing, via spliceosome	10	1	0.78	1144	0.55411	0.55411
GO:0046174	polyol catabolic process	10	1	0.78	1145	0.55411	0.55411
GO:0047496	vesicle transport along microtubule	10	1	0.78	1146	0.55411	0.55411
GO:0048142	germarium-derived cystoblast division	10	1	0.78	1147	0.55411	0.55411
GO:0060795	cell fate commitment involved in formation of primary germ layer	10	1	0.78	1148	0.55411	0.55411
GO:0070509	calcium ion import	10	1	0.78	1149	0.55411	0.55411
GO:2000737	negative regulation of stem cell differentiation	10	1	0.78	1150	0.55411	0.55411
GO:0032956	regulation of actin cytoskeleton organization	88	7	6.82	1094	0.52955	0.55415
GO:0051128	regulation of cellular component organization	675	52	52.34	1117	0.54385	0.55455
GO:0048542	lymph gland development	46	2	3.57	1944	0.88201	0.5553
GO:0007405	neuroblast proliferation	84	3	6.51	2259	0.96361	0.55661
GO:0006952	defense response	298	18	23.11	1994	0.89602	0.55779
GO:0016567	protein ubiquitination	154	12	11.94	1106	0.53724	0.56056
GO:0007097	nuclear migration	31	3	2.4	896	0.43571	0.56509
GO:0006289	nucleotide-excision repair	24	2	1.86	1175	0.56554	0.56554
GO:0043966	histone H3 acetylation	24	2	1.86	1176	0.56554	0.56554
GO:0046716	muscle cell cellular homeostasis	24	2	1.86	1177	0.56554	0.56554
GO:0022008	neurogenesis	716	40	55.52	2423	0.99278	0.56555
GO:0006338	chromatin remodeling	102	12	7.91	320	0.09527	0.56898
GO:0042221	response to chemical	788	40	61.11	2523	0.99932	0.56971
GO:0030718	germ-line stem cell population maintenance	65	5	5.04	1188	0.57469	0.57469
GO:0006807	nitrogen compound metabolic process	3667	263	284.36	2307	0.97217	0.58219
GO:0060070	canonical Wnt signaling pathway	66	7	5.12	520	0.24908	0.58756
GO:0007317	regulation of pole plasm oskar mRNA localization	25	2	1.94	1208	0.58813	0.58813
GO:0050830	defense response to Gram-positive bacterium	25	2	1.94	1209	0.58813	0.58813
GO:0051222	positive regulation of protein transport	22	2	1.71	1082	0.51775	0.58864
GO:0000737	DNA catabolic process, endonucleolytic	11	1	0.85	1216	0.58873	0.58873
GO:0002027	regulation of heart rate	11	1	0.85	1217	0.58873	0.58873
GO:0006964	positive regulation of biosynthetic process of antibacterial peptides active against Gram-negative b...	11	1	0.85	1218	0.58873	0.58873
GO:0007200	phospholipase C-activating G-protein coupled receptor signaling pathway	11	1	0.85	1219	0.58873	0.58873
GO:0007394	dorsal closure, elongation of leading edge cells	11	1	0.85	1220	0.58873	0.58873
GO:0007412	axon target recognition	11	1	0.85	1221	0.58873	0.58873
GO:0007620	copulation	11	1	0.85	1222	0.58873	0.58873
GO:0015701	bicarbonate transport	11	1	0.85	1223	0.58873	0.58873
GO:0016973	poly(A)+ mRNA export from nucleus	11	1	0.85	1224	0.58873	0.58873
GO:0019432	triglyceride biosynthetic process	11	1	0.85	1225	0.58873	0.58873
GO:0030725	germline ring canal formation	11	1	0.85	1226	0.58873	0.58873
GO:0031057	negative regulation of histone modification	11	1	0.85	1227	0.58873	0.58873
GO:0035290	trunk segmentation	11	1	0.85	1228	0.58873	0.58873
GO:0040040	thermosensory behavior	11	1	0.85	1229	0.58873	0.58873
GO:0046129	purine ribonucleoside biosynthetic process	11	1	0.85	1230	0.58873	0.58873
GO:0046514	ceramide catabolic process	11	1	0.85	1231	0.58873	0.58873
GO:0051153	regulation of striated muscle cell differentiation	11	1	0.85	1232	0.58873	0.58873
GO:0060964	regulation of gene silencing by miRNA	11	1	0.85	1233	0.58873	0.58873
GO:0061343	cell adhesion involved in heart morphogenesis	11	1	0.85	1234	0.58873	0.58873
GO:0071480	cellular response to gamma radiation	11	1	0.85	1235	0.58873	0.58873
GO:0090303	positive regulation of wound healing	11	1	0.85	1236	0.58873	0.58873
GO:0007530	sex determination	24	2	1.86	1178	0.56554	0.58874
GO:1901136	carbohydrate derivative catabolic process	62	4	4.81	1509	0.71912	0.58938
GO:0006959	humoral immune response	85	3	6.59	2269	0.96576	0.59127
GO:0009880	embryonic pattern specification	185	10	14.35	2082	0.91749	0.59182
GO:0030707	ovarian follicle cell development	282	17	21.87	1988	0.89189	0.59645
GO:0007015	actin filament organization	129	10	10	1121	0.54865	0.60938
GO:0043954	cellular component maintenance	26	2	2.02	1269	0.60983	0.60983
GO:0051259	protein complex oligomerization	36	4	2.79	572	0.304	0.6199
GO:0030010	establishment of cell polarity	48	4	3.72	1065	0.51699	0.62053
GO:0000060	protein import into nucleus, translocation	12	1	0.93	1281	0.62067	0.62067
GO:0006911	phagocytosis, engulfment	12	1	0.93	1282	0.62067	0.62067
GO:0006998	nuclear envelope organization	12	1	0.93	1283	0.62067	0.62067
GO:0007016	cytoskeletal anchoring at plasma membrane	12	1	0.93	1284	0.62067	0.62067
GO:0007193	adenylate cyclase-inhibiting G-protein coupled receptor signaling pathway	12	1	0.93	1285	0.62067	0.62067
GO:0007220	Notch receptor processing	12	1	0.93	1286	0.62067	0.62067
GO:0009047	dosage compensation by hyperactivation of X chromosome	12	1	0.93	1287	0.62067	0.62067
GO:0009065	glutamine family amino acid catabolic process	12	1	0.93	1288	0.62067	0.62067
GO:0009855	determination of bilateral symmetry	12	1	0.93	1289	0.62067	0.62067
GO:0010107	potassium ion import	12	1	0.93	1290	0.62067	0.62067
GO:0017158	regulation of calcium ion-dependent exocytosis	12	1	0.93	1291	0.62067	0.62067
GO:0035567	non-canonical Wnt signaling pathway	12	1	0.93	1292	0.62067	0.62067
GO:0035725	sodium ion transmembrane transport	12	1	0.93	1293	0.62067	0.62067
GO:0042632	cholesterol homeostasis	12	1	0.93	1294	0.62067	0.62067
GO:0071577	zinc ion transmembrane transport	12	1	0.93	1295	0.62067	0.62067
GO:0072375	medium-term memory	12	1	0.93	1296	0.62067	0.62067
GO:0032880	regulation of protein localization	77	6	5.97	1173	0.55679	0.6207
GO:0019439	aromatic compound catabolic process	156	12	12.1	1172	0.55581	0.62079
GO:0010720	positive regulation of cell development	82	6	6.36	1279	0.61948	0.62097
GO:0009062	fatty acid catabolic process	44	2	3.41	1893	0.86603	0.62168
GO:0060548	negative regulation of cell death	109	7	8.45	1601	0.75138	0.62172
GO:0006464	cellular protein modification process	1011	68	78.4	2083	0.91827	0.62173
GO:0051050	positive regulation of transport	88	5	6.82	1787	0.82308	0.62197
GO:0043900	regulation of multi-organism process	116	5	9	2203	0.95267	0.62346
GO:0048190	wing disc dorsal/ventral pattern formation	41	3	3.18	1322	0.62647	0.62647
GO:0048569	post-embryonic animal organ development	369	19	28.61	2359	0.98281	0.62752
GO:0007338	single fertilization	27	2	2.09	1333	0.63065	0.63065
GO:0035011	melanotic encapsulation of foreign target	27	2	2.09	1334	0.63065	0.63065
GO:0030307	positive regulation of cell growth	40	3	3.1	1267	0.6095	0.63066
GO:0048468	cell development	1169	74	90.65	2351	0.98155	0.63396
GO:0051124	synaptic growth at neuromuscular junction	118	3	9.15	2462	0.99585	0.6367
GO:0008586	imaginal disc-derived wing vein morphogenesis	42	3	3.26	1345	0.64293	0.64293
GO:0009411	response to UV	23	3	1.78	529	0.2623	0.64931
GO:0002385	mucosal immune response	13	1	1.01	1349	0.65014	0.65014
GO:0006536	glutamate metabolic process	13	1	1.01	1350	0.65014	0.65014
GO:0007204	positive regulation of cytosolic calcium ion concentration	13	1	1.01	1351	0.65014	0.65014
GO:0010025	wax biosynthetic process	13	1	1.01	1352	0.65014	0.65014
GO:0015696	ammonium transport	13	1	1.01	1353	0.65014	0.65014
GO:0016575	histone deacetylation	13	1	1.01	1354	0.65014	0.65014
GO:0019367	fatty acid elongation, saturated fatty acid	13	1	1.01	1355	0.65014	0.65014
GO:0030237	female sex determination	13	1	1.01	1356	0.65014	0.65014
GO:0034625	fatty acid elongation, monounsaturated fatty acid	13	1	1.01	1357	0.65014	0.65014
GO:0034626	fatty acid elongation, polyunsaturated fatty acid	13	1	1.01	1358	0.65014	0.65014
GO:0043112	receptor metabolic process	13	1	1.01	1359	0.65014	0.65014
GO:0043455	regulation of secondary metabolic process	13	1	1.01	1360	0.65014	0.65014
GO:0045773	positive regulation of axon extension	13	1	1.01	1361	0.65014	0.65014
GO:0045880	positive regulation of smoothened signaling pathway	13	1	1.01	1362	0.65014	0.65014
GO:0046173	polyol biosynthetic process	13	1	1.01	1363	0.65014	0.65014
GO:0007112	male meiosis cytokinesis	28	2	2.17	1393	0.65059	0.65059
GO:0045454	cell redox homeostasis	28	2	2.17	1394	0.65059	0.65059
GO:0051348	negative regulation of transferase activity	28	2	2.17	1395	0.65059	0.65059
GO:0090263	positive regulation of canonical Wnt signaling pathway	28	2	2.17	1396	0.65059	0.65059
GO:0050777	negative regulation of immune response	38	2	2.95	1737	0.80552	0.65077
GO:0001708	cell fate specification	68	6	5.27	894	0.43387	0.65759
GO:0050877	nervous system process	365	19	28.3	2342	0.98019	0.65996
GO:0007169	transmembrane receptor protein tyrosine kinase signaling pathway	155	7	12.02	2254	0.96202	0.66461
GO:0051301	cell division	225	28	17.45	127	0.0082	0.66989
GO:0006915	apoptotic process	231	16	17.91	1510	0.71962	0.67136
GO:0046843	dorsal appendage formation	44	3	3.41	1436	0.6743	0.6743
GO:0007166	cell surface receptor signaling pathway	565	37	43.81	1962	0.88637	0.67662
GO:0045732	positive regulation of protein catabolic process	40	4	3.1	722	0.3764	0.67665
GO:0072384	organelle transport along microtubule	24	2	1.86	1179	0.56554	0.67717
GO:0007162	negative regulation of cell adhesion	14	1	1.09	1440	0.67732	0.67732
GO:0008594	photoreceptor cell morphogenesis	14	1	1.09	1441	0.67732	0.67732
GO:0030422	production of siRNA involved in RNA interference	14	1	1.09	1442	0.67732	0.67732
GO:0035336	long-chain fatty-acyl-CoA metabolic process	14	1	1.09	1443	0.67732	0.67732
GO:0038083	peptidyl-tyrosine autophosphorylation	14	1	1.09	1444	0.67732	0.67732
GO:0051865	protein autoubiquitination	14	1	1.09	1445	0.67732	0.67732
GO:2000243	positive regulation of reproductive process	14	1	1.09	1446	0.67732	0.67732
GO:0035006	melanization defense response	41	3	3.18	1323	0.62647	0.67738
GO:0034968	histone lysine methylation	43	3	3.33	1414	0.65888	0.67748
GO:0009887	animal organ morphogenesis	603	39	46.76	2044	0.90798	0.67761
GO:0007254	JNK cascade	65	4	5.04	1606	0.75318	0.67796
GO:0006631	fatty acid metabolic process	91	5	7.06	1841	0.84462	0.67865
GO:0060627	regulation of vesicle-mediated transport	112	4	8.69	2333	0.97823	0.68044
GO:0007281	germ cell development	621	40	48.16	2070	0.91547	0.68321
GO:0040011	locomotion	508	27	39.39	2400	0.9897	0.68609
GO:0007528	neuromuscular junction development	150	5	11.63	2421	0.99255	0.69405
GO:0008104	protein localization	570	25	44.2	2537	0.99971	0.69798
GO:2000241	regulation of reproductive process	71	10	5.51	218	0.04601	0.69926
GO:0007447	imaginal disc pattern formation	83	8	6.44	578	0.31392	0.70123
GO:0007009	plasma membrane organization	21	2	1.63	998	0.49258	0.70203
GO:0048167	regulation of synaptic plasticity	23	2	1.78	1109	0.54208	0.70213
GO:0007040	lysosome organization	15	1	1.16	1476	0.70239	0.70239
GO:0007160	cell-matrix adhesion	15	1	1.16	1477	0.70239	0.70239
GO:0016239	positive regulation of macroautophagy	15	1	1.16	1478	0.70239	0.70239
GO:0016266	O-glycan processing	15	1	1.16	1479	0.70239	0.70239
GO:0035073	pupariation	15	1	1.16	1480	0.70239	0.70239
GO:0035209	pupal development	15	1	1.16	1481	0.70239	0.70239
GO:0060857	establishment of glial blood-brain barrier	15	1	1.16	1482	0.70239	0.70239
GO:0021782	glial cell development	30	2	2.33	1462	0.6879	0.7025
GO:0010212	response to ionizing radiation	39	2	3.02	1775	0.81706	0.70296
GO:0043902	positive regulation of multi-organism process	43	2	3.33	1876	0.85731	0.70317
GO:0051603	proteolysis involved in cellular protein catabolic process	231	16	17.91	1511	0.71962	0.70359
GO:0070374	positive regulation of ERK1 and ERK2 cascade	46	3	3.57	1493	0.70359	0.70359
GO:0030334	regulation of cell migration	31	2	2.4	1498	0.70529	0.70529
GO:0035159	regulation of tube length, open tracheal system	31	2	2.4	1499	0.70529	0.70529
GO:0046331	lateral inhibition	31	2	2.4	1500	0.70529	0.70529
GO:0002164	larval development	130	5	10.08	2329	0.97729	0.70569
GO:0045089	positive regulation of innate immune response	47	3	3.64	1506	0.71747	0.71747
GO:0016573	histone acetylation	74	7	5.74	688	0.34965	0.72023
GO:0007098	centrosome cycle	65	12	5.04	94	0.00377	0.72074
GO:0008340	determination of adult lifespan	134	9	10.39	1512	0.72175	0.72175
GO:0006487	protein N-linked glycosylation	32	2	2.48	1513	0.72187	0.72187
GO:0006820	anion transport	170	16	13.18	519	0.24385	0.72347
GO:0007224	smoothened signaling pathway	50	5	3.88	680	0.34596	0.72462
GO:0000132	establishment of mitotic spindle orientation	16	1	1.24	1522	0.72551	0.72551
GO:0009649	entrainment of circadian clock	16	1	1.24	1523	0.72551	0.72551
GO:0035212	cell competition in a multicellular organism	16	1	1.24	1524	0.72551	0.72551
GO:0035249	synaptic transmission, glutamatergic	16	1	1.24	1525	0.72551	0.72551
GO:0042074	cell migration involved in gastrulation	16	1	1.24	1526	0.72551	0.72551
GO:0042761	very long-chain fatty acid biosynthetic process	16	1	1.24	1527	0.72551	0.72551
GO:0045476	nurse cell apoptotic process	16	1	1.24	1528	0.72551	0.72551
GO:0046854	phosphatidylinositol phosphorylation	16	1	1.24	1529	0.72551	0.72551
GO:0051346	negative regulation of hydrolase activity	39	2	3.02	1776	0.81706	0.72603
GO:0007617	mating behavior	71	4	5.51	1748	0.81163	0.72635
GO:0030097	hemopoiesis	72	3	5.58	2117	0.92583	0.72705
GO:0043436	oxoacid metabolic process	332	23	25.74	1597	0.7476	0.72723
GO:0044087	regulation of cellular component biogenesis	269	15	20.86	2142	0.93588	0.7293
GO:0006629	lipid metabolic process	386	21	29.93	2308	0.97228	0.73011
GO:0000209	protein polyubiquitination	63	4	4.89	1549	0.73084	0.73084
GO:0006397	mRNA processing	278	13	21.56	2374	0.98594	0.73111
GO:0010033	response to organic substance	394	22	30.55	2266	0.9651	0.7312
GO:0048812	neuron projection morphogenesis	364	16	28.23	2476	0.99694	0.73364
GO:0007399	nervous system development	904	57	70.1	2280	0.9673	0.73511
GO:0007606	sensory perception of chemical stimulus	75	6	5.82	1095	0.53042	0.73697
GO:0007427	epithelial cell migration, open tracheal system	33	2	2.56	1560	0.73765	0.73765
GO:0042127	regulation of cell proliferation	192	12	14.89	1786	0.82191	0.73985
GO:0051225	spindle assembly	61	10	4.73	157	0.01789	0.74322
GO:0051017	actin filament bundle assembly	28	4	2.17	423	0.16792	0.74547
GO:0051051	negative regulation of transport	32	3	2.48	910	0.45663	0.74631
GO:0048520	positive regulation of behavior	23	2	1.78	1110	0.54208	0.7465
GO:0045471	response to ethanol	65	5	5.04	1189	0.57469	0.74667
GO:0007179	transforming growth factor beta receptor signaling pathway	17	1	1.32	1572	0.74684	0.74684
GO:0009312	oligosaccharide biosynthetic process	17	1	1.32	1573	0.74684	0.74684
GO:0030301	cholesterol transport	17	1	1.32	1574	0.74684	0.74684
GO:0035099	hemocyte migration	17	1	1.32	1575	0.74684	0.74684
GO:0071390	cellular response to ecdysone	17	1	1.32	1576	0.74684	0.74684
GO:0072347	response to anesthetic	17	1	1.32	1577	0.74684	0.74684
GO:1904263	positive regulation of TORC1 signaling	17	1	1.32	1578	0.74684	0.74684
GO:1901576	organic substance biosynthetic process	1984	152	153.85	1252	0.58903	0.74833
GO:0008286	insulin receptor signaling pathway	34	2	2.64	1602	0.75266	0.75266
GO:0007435	salivary gland morphogenesis	81	4	6.28	1956	0.88357	0.7576
GO:0035317	imaginal disc-derived wing hair organization	39	5	3.02	450	0.18144	0.76503
GO:0048085	adult chitin-containing cuticle pigmentation	28	4	2.17	424	0.16792	0.76513
GO:0097164	ammonium ion metabolic process	29	3	2.25	806	0.39304	0.7658
GO:0051494	negative regulation of cytoskeleton organization	29	2	2.25	1429	0.66967	0.76643
GO:0006383	transcription by RNA polymerase III	18	1	1.4	1627	0.76652	0.76652
GO:0007189	adenylate cyclase-activating G-protein coupled receptor signaling pathway	18	1	1.4	1628	0.76652	0.76652
GO:0007475	apposition of dorsal and ventral imaginal disc-derived wing surfaces	18	1	1.4	1629	0.76652	0.76652
GO:0015986	ATP synthesis coupled proton transport	18	1	1.4	1630	0.76652	0.76652
GO:0032786	positive regulation of DNA-templated transcription, elongation	18	1	1.4	1631	0.76652	0.76652
GO:0034333	adherens junction assembly	18	1	1.4	1632	0.76652	0.76652
GO:0042753	positive regulation of circadian rhythm	18	1	1.4	1633	0.76652	0.76652
GO:0045433	male courtship behavior, veined wing generated song production	18	1	1.4	1634	0.76652	0.76652
GO:0046839	phospholipid dephosphorylation	18	1	1.4	1635	0.76652	0.76652
GO:0050805	negative regulation of synaptic transmission	18	1	1.4	1636	0.76652	0.76652
GO:0034332	adherens junction organization	36	2	2.79	1672	0.78048	0.76677
GO:0007417	central nervous system development	204	13	15.82	1743	0.80898	0.77
GO:0042052	rhabdomere development	36	2	2.79	1673	0.78048	0.78048
GO:0022603	regulation of anatomical structure morphogenesis	198	18	15.35	547	0.2736	0.78273
GO:0022404	molting cycle process	48	5	3.72	580	0.3145	0.7836
GO:0000387	spliceosomal snRNP assembly	19	1	1.47	1680	0.78467	0.78467
GO:0007413	axonal fasciculation	19	1	1.47	1681	0.78467	0.78467
GO:0044275	cellular carbohydrate catabolic process	19	1	1.47	1682	0.78467	0.78467
GO:0045167	asymmetric protein localization involved in cell fate determination	19	1	1.47	1683	0.78467	0.78467
GO:0046165	alcohol biosynthetic process	32	2	2.48	1514	0.72187	0.78468
GO:0008063	Toll signaling pathway	40	2	3.1	1793	0.82798	0.78506
GO:0072330	monocarboxylic acid biosynthetic process	53	2	4.11	2115	0.92505	0.78567
GO:0044249	cellular biosynthetic process	1954	150	151.52	1192	0.57679	0.78569
GO:0009058	biosynthetic process	2009	153	155.79	1315	0.6242	0.78676
GO:0001745	compound eye morphogenesis	247	19	19.15	1125	0.55044	0.78932
GO:0007163	establishment or maintenance of cell polarity	185	14	14.35	1194	0.5791	0.7929
GO:0006351	transcription, DNA-templated	933	84	72.35	288	0.0739	0.79307
GO:0016477	cell migration	266	15	20.63	2121	0.92922	0.79744
GO:0009266	response to temperature stimulus	105	10	8.14	557	0.29576	0.79997
GO:0046425	regulation of JAK-STAT cascade	33	3	2.56	982	0.47722	0.80083
GO:0032147	activation of protein kinase activity	29	2	2.25	1430	0.66967	0.80123
GO:0006032	chitin catabolic process	20	1	1.55	1715	0.80141	0.80141
GO:0006081	cellular aldehyde metabolic process	20	1	1.55	1716	0.80141	0.80141
GO:0007279	pole cell formation	20	1	1.55	1717	0.80141	0.80141
GO:0007362	terminal region determination	20	1	1.55	1718	0.80141	0.80141
GO:0016199	axon midline choice point recognition	20	1	1.55	1719	0.80141	0.80141
GO:0034243	regulation of transcription elongation from RNA polymerase II promoter	20	1	1.55	1720	0.80141	0.80141
GO:0045879	negative regulation of smoothened signaling pathway	20	1	1.55	1721	0.80141	0.80141
GO:0006493	protein O-linked glycosylation	35	2	2.71	1659	0.76693	0.80151
GO:1901361	organic cyclic compound catabolic process	164	12	12.72	1328	0.62698	0.80152
GO:0032504	multicellular organism reproduction	898	69	69.64	1167	0.55462	0.8019
GO:0006644	phospholipid metabolic process	122	8	9.46	1566	0.73979	0.80196
GO:0007423	sensory organ development	383	28	29.7	1417	0.65955	0.80215
GO:0007314	oocyte anterior/posterior axis specification	81	4	6.28	1957	0.88357	0.80244
GO:0001709	cell fate determination	120	12	9.31	489	0.2188	0.81656
GO:0031532	actin cytoskeleton reorganization	28	2	2.17	1397	0.65059	0.81659
GO:0070588	calcium ion transmembrane transport	28	2	2.17	1398	0.65059	0.81659
GO:0045451	pole plasm oskar mRNA localization	46	3	3.57	1494	0.70359	0.81682
GO:0000245	spliceosomal complex assembly	21	1	1.63	1756	0.81685	0.81685
GO:0006165	nucleoside diphosphate phosphorylation	21	1	1.63	1757	0.81685	0.81685
GO:0008592	regulation of Toll signaling pathway	21	1	1.63	1758	0.81685	0.81685
GO:0010821	regulation of mitochondrion organization	21	1	1.63	1759	0.81685	0.81685
GO:0035050	embryonic heart tube development	21	1	1.63	1760	0.81685	0.81685
GO:0048332	mesoderm morphogenesis	21	1	1.63	1761	0.81685	0.81685
GO:0070897	DNA-templated transcriptional preinitiation complex assembly	21	1	1.63	1762	0.81685	0.81685
GO:0051607	defense response to virus	38	2	2.95	1738	0.80552	0.81704
GO:0050832	defense response to fungus	39	2	3.02	1777	0.81706	0.81706
GO:0035214	eye-antennal disc development	51	2	3.95	2066	0.91456	0.81762
GO:0007613	memory	97	5	7.52	1942	0.88123	0.81795
GO:0042391	regulation of membrane potential	78	5	6.05	1555	0.73369	0.82017
GO:0008045	motor neuron axon guidance	56	3	4.34	1782	0.82045	0.82045
GO:0006796	phosphate-containing compound metabolic process	815	47	63.2	2417	0.99174	0.82665
GO:0006418	tRNA aminoacylation for protein translation	40	2	3.1	1794	0.82798	0.82798
GO:0031935	regulation of chromatin silencing	40	4	3.1	723	0.3764	0.83021
GO:0043066	negative regulation of apoptotic process	89	5	6.9	1801	0.83051	0.83051
GO:0003007	heart morphogenesis	33	2	2.56	1561	0.73765	0.83102
GO:0007632	visual behavior	22	1	1.71	1804	0.8311	0.8311
GO:0010951	negative regulation of endopeptidase activity	22	1	1.71	1805	0.8311	0.8311
GO:0016318	ommatidial rotation	22	1	1.71	1806	0.8311	0.8311
GO:0030032	lamellipodium assembly	22	1	1.71	1807	0.8311	0.8311
GO:0034472	snRNA 3'-end processing	22	1	1.71	1808	0.8311	0.8311
GO:0051568	histone H3-K4 methylation	22	1	1.71	1809	0.8311	0.8311
GO:0042048	olfactory behavior	60	3	4.65	1855	0.85484	0.83162
GO:0000381	regulation of alternative mRNA splicing, via spliceosome	74	4	5.74	1817	0.83632	0.83632
GO:1902905	positive regulation of supramolecular fiber organization	47	4	3.64	1012	0.50011	0.83716
GO:0007186	G-protein coupled receptor signaling pathway	136	8	10.55	1819	0.83822	0.83717
GO:0009636	response to toxic substance	122	10	9.46	929	0.47587	0.84352
GO:0008345	larval locomotory behavior	23	1	1.78	1830	0.84423	0.84423
GO:0031122	cytoplasmic microtubule organization	23	1	1.78	1831	0.84423	0.84423
GO:0033227	dsRNA transport	23	1	1.78	1832	0.84423	0.84423
GO:0045187	regulation of circadian sleep/wake cycle, sleep	23	1	1.78	1833	0.84423	0.84423
GO:0051646	mitochondrion localization	23	1	1.78	1834	0.84423	0.84423
GO:0016042	lipid catabolic process	96	4	7.44	2191	0.94669	0.84566
GO:0045475	locomotor rhythm	59	3	4.58	1843	0.84683	0.84683
GO:0007391	dorsal closure	95	6	7.37	1615	0.75631	0.85073
GO:0006367	transcription initiation from RNA polymerase II promoter	76	4	5.89	1847	0.85124	0.85124
GO:0048646	anatomical structure formation involved in morphogenesis	440	37	34.12	586	0.32421	0.85421
GO:0010628	positive regulation of gene expression	373	28	28.92	1262	0.60241	0.85425
GO:0022416	chaeta development	60	3	4.65	1856	0.85484	0.85484
GO:0030866	cortical actin cytoskeleton organization	51	5	3.95	701	0.36177	0.85537
GO:0007526	larval somatic muscle development	24	1	1.86	1858	0.85635	0.85635
GO:0008293	torso signaling pathway	24	1	1.86	1859	0.85635	0.85635
GO:0046329	negative regulation of JNK cascade	24	1	1.86	1860	0.85635	0.85635
GO:0045926	negative regulation of growth	93	5	7.21	1879	0.85775	0.85705
GO:0007416	synapse assembly	149	4	11.55	2485	0.99771	0.85981
GO:0019233	sensory perception of pain	61	3	4.73	1883	0.86249	0.86249
GO:0045944	positive regulation of transcription by RNA polymerase II	230	14	17.84	1887	0.86314	0.86314
GO:0008406	gonad development	44	2	3.41	1894	0.86603	0.86603
GO:0006891	intra-Golgi vesicle-mediated transport	25	1	1.94	1899	0.86753	0.86753
GO:0007603	phototransduction, visible light	25	1	1.94	1900	0.86753	0.86753
GO:0045824	negative regulation of innate immune response	25	1	1.94	1901	0.86753	0.86753
GO:0045887	positive regulation of synaptic growth at neuromuscular junction	25	1	1.94	1902	0.86753	0.86753
GO:0007623	circadian rhythm	129	7	10	1950	0.88224	0.86856
GO:0016192	vesicle-mediated transport	465	15	36.06	2559	0.99999	0.87136
GO:0098609	cell-cell adhesion	89	3	6.9	2313	0.97322	0.87583
GO:0008039	synaptic target recognition	36	2	2.79	1674	0.78048	0.87773
GO:0006378	mRNA polyadenylation	26	1	2.02	1932	0.87783	0.87783
GO:0070050	neuron cellular homeostasis	26	1	2.02	1933	0.87783	0.87783
GO:0008587	imaginal disc-derived wing margin morphogenesis	44	2	3.41	1895	0.86603	0.87802
GO:0008593	regulation of Notch signaling pathway	95	9	7.37	583	0.31554	0.88609
GO:0008347	glial cell migration	27	1	2.09	1966	0.88734	0.88734
GO:0010501	RNA secondary structure unwinding	27	1	2.09	1967	0.88734	0.88734
GO:0031338	regulation of vesicle fusion	27	1	2.09	1968	0.88734	0.88734
GO:0032456	endocytic recycling	27	1	2.09	1969	0.88734	0.88734
GO:0034620	cellular response to unfolded protein	27	1	2.09	1970	0.88734	0.88734
GO:0043401	steroid hormone mediated signaling pathway	27	1	2.09	1971	0.88734	0.88734
GO:0072499	photoreceptor cell axon guidance	27	1	2.09	1972	0.88734	0.88734
GO:0007616	long-term memory	65	3	5.04	1985	0.88964	0.88964
GO:0048813	dendrite morphogenesis	131	7	10.16	1987	0.89141	0.89141
GO:0000902	cell morphogenesis	466	24	36.14	2414	0.99115	0.89257
GO:0043065	positive regulation of apoptotic process	50	5	3.88	681	0.34596	0.89511
GO:0071482	cellular response to light stimulus	37	3	2.87	1169	0.55557	0.89555
GO:0045455	ecdysteroid metabolic process	28	1	2.17	1995	0.89611	0.89611
GO:0045793	positive regulation of cell size	28	1	2.17	1996	0.89611	0.89611
GO:0048278	vesicle docking	28	1	2.17	1997	0.89611	0.89611
GO:0007349	cellularization	81	5	6.28	1619	0.76348	0.89616
GO:0043161	proteasome-mediated ubiquitin-dependent protein catabolic process	159	14	12.33	689	0.34972	0.8966
GO:0007424	open tracheal system development	200	9	15.51	2327	0.97712	0.89988
GO:0001700	embryonic development via the syncytial blastoderm	152	13	11.79	809	0.39824	0.90316
GO:0007591	molting cycle, chitin-based cuticle	81	7	6.28	902	0.44071	0.90338
GO:0042742	defense response to bacterium	149	11	11.55	1274	0.61323	0.90391
GO:0008355	olfactory learning	38	2	2.95	1739	0.80552	0.90407
GO:0007304	chorion-containing eggshell formation	105	7	8.14	1505	0.7157	0.90416
GO:0007156	homophilic cell adhesion via plasma membrane adhesion molecules	29	1	2.25	2025	0.9042	0.9042
GO:0007300	ovarian nurse cell to oocyte transport	29	1	2.25	2026	0.9042	0.9042
GO:0010004	gastrulation involving germ band extension	29	1	2.25	2027	0.9042	0.9042
GO:0042446	hormone biosynthetic process	29	1	2.25	2028	0.9042	0.9042
GO:0045807	positive regulation of endocytosis	29	1	2.25	2029	0.9042	0.9042
GO:0007409	axonogenesis	271	9	21.01	2525	0.99935	0.90871
GO:0006090	pyruvate metabolic process	30	1	2.33	2051	0.91166	0.91166
GO:0006694	steroid biosynthetic process	30	1	2.33	2052	0.91166	0.91166
GO:0007455	eye-antennal disc morphogenesis	30	1	2.33	2053	0.91166	0.91166
GO:0009166	nucleotide catabolic process	30	1	2.33	2054	0.91166	0.91166
GO:0050821	protein stabilization	30	1	2.33	2055	0.91166	0.91166
GO:1901565	organonitrogen compound catabolic process	388	28	30.09	1457	0.68655	0.91199
GO:0010629	negative regulation of gene expression	472	39	36.6	699	0.36051	0.91219
GO:0070925	organelle assembly	269	33	20.86	107	0.00537	0.91227
GO:0007517	muscle organ development	76	3	5.89	2170	0.94126	0.91228
GO:0048565	digestive tract development	85	6	6.59	1408	0.65458	0.91823
GO:0007218	neuropeptide signaling pathway	31	1	2.4	2087	0.91854	0.91854
GO:0007406	negative regulation of neuroblast proliferation	31	1	2.4	2088	0.91854	0.91854
GO:0035070	salivary gland histolysis	31	1	2.4	2089	0.91854	0.91854
GO:0016485	protein processing	59	4	4.58	1455	0.68172	0.92432
GO:0006635	fatty acid beta-oxidation	32	1	2.48	2107	0.92488	0.92488
GO:0016325	oocyte microtubule cytoskeleton organization	32	1	2.48	2108	0.92488	0.92488
GO:0034599	cellular response to oxidative stress	32	1	2.48	2109	0.92488	0.92488
GO:0051453	regulation of intracellular pH	32	1	2.48	2110	0.92488	0.92488
GO:0016579	protein deubiquitination	41	2	3.18	1820	0.83831	0.9306
GO:0000045	autophagosome assembly	33	1	2.56	2128	0.93073	0.93073
GO:0030148	sphingolipid biosynthetic process	33	1	2.56	2129	0.93073	0.93073
GO:0001510	RNA methylation	41	3	3.18	1324	0.62647	0.93565
GO:0006909	phagocytosis	50	3	3.88	1609	0.75607	0.93588
GO:0035206	regulation of hemocyte proliferation	34	1	2.64	2143	0.93613	0.93613
GO:0007444	imaginal disc development	457	24	35.44	2393	0.98792	0.93846
GO:0019991	septate junction assembly	35	1	2.71	2164	0.9411	0.9411
GO:1990542	mitochondrial transmembrane transport	35	1	2.71	2165	0.9411	0.9411
GO:0016311	dephosphorylation	135	7	10.47	2043	0.90797	0.94165
GO:0043547	positive regulation of GTPase activity	57	2	4.42	2173	0.9425	0.9425
GO:0046907	intracellular transport	553	21	42.88	2554	0.99997	0.94284
GO:0006470	protein dephosphorylation	84	5	6.51	1702	0.79068	0.94396
GO:0007030	Golgi organization	77	3	5.97	2179	0.94463	0.94463
GO:0019216	regulation of lipid metabolic process	36	1	2.79	2182	0.94569	0.94569
GO:0006030	chitin metabolic process	56	2	4.34	2159	0.93854	0.94585
GO:0009267	cellular response to starvation	59	2	4.58	2199	0.94971	0.94971
GO:0007552	metamorphosis	374	19	29	2371	0.98565	0.95224
GO:0006888	ER to Golgi vesicle-mediated transport	60	2	4.65	2204	0.95298	0.95298
GO:0008360	regulation of cell shape	61	4	4.73	1502	0.70703	0.95351
GO:0032273	positive regulation of protein polymerization	38	1	2.95	2210	0.95383	0.95383
GO:0055059	asymmetric neuroblast division	38	1	2.95	2211	0.95383	0.95383
GO:0030509	BMP signaling pathway	39	1	3.02	2222	0.95743	0.95743
GO:0032482	Rab protein signal transduction	39	1	3.02	2223	0.95743	0.95743
GO:0009306	protein secretion	66	2	5.12	2282	0.96872	0.9577
GO:0017144	drug metabolic process	275	15	21.32	2192	0.94761	0.95852
GO:0050808	synapse organization	233	6	18.07	2540	0.99983	0.95991
GO:0006749	glutathione metabolic process	40	1	3.1	2239	0.96075	0.96075
GO:0018105	peptidyl-serine phosphorylation	40	1	3.1	2240	0.96075	0.96075
GO:0051495	positive regulation of cytoskeleton organization	52	4	4.03	1195	0.58161	0.96333
GO:0046579	positive regulation of Ras protein signal transduction	57	4	4.42	1410	0.65493	0.96341
GO:0006511	ubiquitin-dependent protein catabolic process	203	15	15.74	1276	0.6172	0.96349
GO:0016079	synaptic vesicle exocytosis	48	2	3.72	2006	0.89621	0.9637
GO:0006997	nucleus organization	54	2	4.19	2122	0.92983	0.96661
GO:0007411	axon guidance	211	8	16.36	2440	0.99419	0.96725
GO:0006417	regulation of translation	144	8	11.17	1941	0.87973	0.96874
GO:0007298	border follicle cell migration	106	4	8.22	2291	0.96934	0.96934
GO:0008285	negative regulation of cell proliferation	79	2	6.13	2386	0.98733	0.96959
GO:0022411	cellular component disassembly	109	4	8.45	2319	0.97414	0.96965
GO:0007274	neuromuscular synaptic transmission	67	2	5.2	2294	0.97079	0.97079
GO:0048477	oogenesis	552	33	42.8	2237	0.95987	0.97159
GO:0007520	myoblast fusion	44	1	3.41	2299	0.97163	0.97163
GO:0007605	sensory perception of sound	44	1	3.41	2300	0.97163	0.97163
GO:0006457	protein folding	112	6	8.69	1925	0.87591	0.97768
GO:0016322	neuron remodeling	47	1	3.64	2331	0.97777	0.97777
GO:0048863	stem cell differentiation	74	5	5.74	1471	0.68989	0.97921
GO:0006400	tRNA modification	48	1	3.72	2339	0.9795	0.9795
GO:0006897	endocytosis	181	6	14.04	2466	0.99613	0.98016
GO:0009968	negative regulation of signal transduction	260	15	20.16	2065	0.91415	0.98059
GO:0008344	adult locomotory behavior	64	3	4.96	1951	0.88334	0.98099
GO:0045087	innate immune response	164	8	12.72	2190	0.94653	0.98137
GO:0000398	mRNA splicing, via spliceosome	226	11	17.53	2284	0.96901	0.98208
GO:0010506	regulation of autophagy	86	2	6.67	2419	0.99229	0.98281
GO:0045333	cellular respiration	96	5	7.44	1923	0.87569	0.98628
GO:0048871	multicellular organismal homeostasis	54	1	4.19	2388	0.98742	0.98742
GO:0051129	negative regulation of cellular component organization	136	10	10.55	1277	0.61731	0.98905
GO:0051240	positive regulation of multicellular organismal process	179	11	13.88	1800	0.83018	0.98927
GO:0048640	negative regulation of developmental growth	69	4	5.35	1709	0.79353	0.99212
GO:0007173	epidermal growth factor receptor signaling pathway	63	1	4.89	2432	0.99395	0.99395
GO:0016319	mushroom body development	63	1	4.89	2433	0.99395	0.99395
GO:0007480	imaginal disc-derived leg morphogenesis	65	1	5.04	2448	0.99486	0.99486
GO:0007476	imaginal disc-derived wing morphogenesis	220	12	17.06	2120	0.92876	0.99595
GO:0035556	intracellular signal transduction	572	28	44.36	2493	0.99814	0.99652
GO:0018193	peptidyl-amino acid modification	282	15	21.87	2233	0.95892	0.99717
GO:0009108	coenzyme biosynthetic process	73	1	5.66	2478	0.99732	0.99732
GO:0032543	mitochondrial translation	102	2	7.91	2481	0.99757	0.99757
GO:0022618	ribonucleoprotein complex assembly	120	3	9.31	2469	0.99637	0.99851
GO:0006508	proteolysis	573	33	44.43	2330	0.97746	0.99854
GO:0007005	mitochondrion organization	160	5	12.41	2460	0.99584	0.99969
GO:0006886	intracellular protein transport	310	7	24.04	2561	0.99999	1
GO:0000003	reproduction	994	83	77.08	518	0.24245	1
GO:0000018	regulation of DNA recombination	15	2	1.16	592	0.32633	1
GO:0000038	very long-chain fatty acid metabolic process	19	1	1.47	1684	0.78467	1
GO:0000041	transition metal ion transport	29	1	2.25	2030	0.9042	1
GO:0000096	sulfur amino acid metabolic process	19	1	1.47	1685	0.78467	1
GO:0000097	sulfur amino acid biosynthetic process	10	1	0.78	1151	0.55411	1
GO:0000165	MAPK cascade	149	9	11.55	1792	0.82703	1
GO:0000271	polysaccharide biosynthetic process	16	1	1.24	1530	0.72551	1
GO:0000280	nuclear division	262	58	20.32	6	7.9e-14	1
GO:0000288	nuclear-transcribed mRNA catabolic process, deadenylation-dependent decay	27	2	2.09	1335	0.63065	1
GO:0000289	nuclear-transcribed mRNA poly(A) tail shortening	13	2	1.01	537	0.26712	1
GO:0000337	regulation of transposition, DNA-mediated	6	1	0.47	772	0.38398	1
GO:0000375	RNA splicing, via transesterification reactions	226	11	17.53	2285	0.96901	1
GO:0000377	RNA splicing, via transesterification reactions with bulged adenosine as nucleophile	226	11	17.53	2286	0.96901	1
GO:0000380	alternative mRNA splicing, via spliceosome	74	4	5.74	1818	0.83632	1
GO:0000459	exonucleolytic trimming involved in rRNA processing	5	1	0.39	657	0.33215	1
GO:0000460	maturation of 5.8S rRNA	24	1	1.86	1861	0.85635	1
GO:0000466	maturation of 5.8S rRNA from tricistronic rRNA transcript (SSU-rRNA, 5.8S rRNA, LSU-rRNA)	13	1	1.01	1364	0.65014	1
GO:0000469	cleavage involved in rRNA processing	19	1	1.47	1686	0.78467	1
GO:0000578	embryonic axis specification	119	5	9.23	2235	0.95941	1
GO:0000725	recombinational repair	38	9	2.95	79	0.00202	1
GO:0000726	non-recombinational repair	10	1	0.78	1152	0.55411	1
GO:0000731	DNA synthesis involved in DNA repair	10	3	0.78	203	0.03688	1
GO:0000768	syncytium formation by plasma membrane fusion	44	1	3.41	2301	0.97163	1
GO:0000819	sister chromatid segregation	109	32	8.45	11	1.6e-11	1
GO:0000904	cell morphogenesis involved in differentiation	386	19	29.93	2409	0.9908	1
GO:0000910	cytokinesis	94	13	7.29	182	0.02866	1
GO:0000912	assembly of actomyosin apparatus involved in cytokinesis	20	4	1.55	268	0.0641	1
GO:0000956	nuclear-transcribed mRNA catabolic process	54	2	4.19	2123	0.92983	1
GO:0001505	regulation of neurotransmitter levels	110	10	8.53	684	0.34776	1
GO:0001654	eye development	322	24	24.97	1275	0.61335	1
GO:0001655	urogenital system development	59	5	4.58	992	0.48685	1
GO:0001667	ameboidal-type cell migration	160	6	12.41	2391	0.98776	1
GO:0001672	regulation of chromatin assembly or disassembly	15	2	1.16	593	0.32633	1
GO:0001703	gastrulation with mouth forming first	29	1	2.25	2031	0.9042	1
GO:0001704	formation of primary germ layer	24	1	1.86	1862	0.85635	1
GO:0001736	establishment of planar polarity	88	8	6.82	718	0.37367	1
GO:0001752	compound eye photoreceptor fate commitment	45	2	3.49	1921	0.87425	1
GO:0001754	eye photoreceptor cell differentiation	145	10	11.24	1474	0.69712	1
GO:0001885	endothelial cell development	9	1	0.7	1041	0.51658	1
GO:0001933	negative regulation of protein phosphorylation	62	1	4.81	2427	0.99344	1
GO:0001934	positive regulation of protein phosphorylation	132	10	10.24	1193	0.57868	1
GO:0002065	columnar/cuboidal epithelial cell differentiation	288	17	22.33	2049	0.90935	1
GO:0002066	columnar/cuboidal epithelial cell development	283	17	21.95	1990	0.89498	1
GO:0002165	instar larval or pupal development	444	22	34.43	2430	0.99372	1
GO:0002168	instar larval development	60	2	4.65	2205	0.95298	1
GO:0002225	positive regulation of antimicrobial peptide production	25	1	1.94	1903	0.86753	1
GO:0002237	response to molecule of bacterial origin	13	1	1.01	1365	0.65014	1
GO:0002251	organ or tissue specific immune response	13	1	1.01	1366	0.65014	1
GO:0002252	immune effector process	107	7	8.3	1557	0.73395	1
GO:0002376	immune system process	373	21	28.92	2232	0.95802	1
GO:0002440	production of molecular mediator of immune response	42	2	3.26	1845	0.84808	1
GO:0002520	immune system development	82	4	6.36	1980	0.88925	1
GO:0002683	negative regulation of immune system process	52	3	4.03	1671	0.77936	1
GO:0002684	positive regulation of immune system process	74	3	5.74	2139	0.93396	1
GO:0002697	regulation of immune effector process	52	2	4.03	2098	0.91997	1
GO:0002698	negative regulation of immune effector process	5	1	0.39	658	0.33215	1
GO:0002699	positive regulation of immune effector process	25	1	1.94	1904	0.86753	1
GO:0002700	regulation of production of molecular mediator of immune response	40	2	3.1	1795	0.82798	1
GO:0002702	positive regulation of production of molecular mediator of immune response	25	1	1.94	1905	0.86753	1
GO:0002759	regulation of antimicrobial humoral response	44	1	3.41	2302	0.97163	1
GO:0002760	positive regulation of antimicrobial humoral response	25	1	1.94	1906	0.86753	1
GO:0002775	antimicrobial peptide production	41	1	3.18	2261	0.96381	1
GO:0002777	antimicrobial peptide biosynthetic process	31	1	2.4	2090	0.91854	1
GO:0002778	antibacterial peptide production	18	1	1.4	1637	0.76652	1
GO:0002780	antibacterial peptide biosynthetic process	18	1	1.4	1638	0.76652	1
GO:0002784	regulation of antimicrobial peptide production	39	1	3.02	2224	0.95743	1
GO:0002786	regulation of antibacterial peptide production	18	1	1.4	1639	0.76652	1
GO:0002790	peptide secretion	72	2	5.58	2337	0.97932	1
GO:0002791	regulation of peptide secretion	25	1	1.94	1907	0.86753	1
GO:0002793	positive regulation of peptide secretion	13	1	1.01	1367	0.65014	1
GO:0002803	positive regulation of antibacterial peptide production	15	1	1.16	1483	0.70239	1
GO:0002805	regulation of antimicrobial peptide biosynthetic process	31	1	2.4	2091	0.91854	1
GO:0002807	positive regulation of antimicrobial peptide biosynthetic process	21	1	1.63	1763	0.81685	1
GO:0002808	regulation of antibacterial peptide biosynthetic process	18	1	1.4	1640	0.76652	1
GO:0002812	biosynthetic process of antibacterial peptides active against Gram-negative bacteria	13	1	1.01	1368	0.65014	1
GO:0002813	regulation of biosynthetic process of antibacterial peptides active against Gram-negative bacteria	13	1	1.01	1369	0.65014	1
GO:0002831	regulation of response to biotic stimulus	64	1	4.96	2443	0.99442	1
GO:0002833	positive regulation of response to biotic stimulus	28	1	2.17	1998	0.89611	1
GO:0002920	regulation of humoral immune response	45	1	3.49	2315	0.97384	1
GO:0002922	positive regulation of humoral immune response	25	1	1.94	1908	0.86753	1
GO:0003002	regionalization	372	22	28.85	2135	0.93264	1
GO:0003006	developmental process involved in reproduction	699	45	54.2	2119	0.92837	1
GO:0003013	circulatory system process	38	3	2.95	1186	0.57403	1
GO:0003014	renal system process	22	1	1.71	1810	0.8311	1
GO:0003015	heart process	35	3	2.71	1069	0.51725	1
GO:0003156	regulation of animal organ formation	9	1	0.7	1042	0.51658	1
GO:0003158	endothelium development	9	1	0.7	1043	0.51658	1
GO:0003381	epithelial cell morphogenesis involved in gastrulation	10	1	0.78	1153	0.55411	1
GO:0003382	epithelial cell morphogenesis	23	3	1.78	530	0.2623	1
GO:0005976	polysaccharide metabolic process	35	2	2.71	1660	0.76693	1
GO:0005977	glycogen metabolic process	24	1	1.86	1863	0.85635	1
GO:0005996	monosaccharide metabolic process	49	5	3.8	599	0.33019	1
GO:0006022	aminoglycan metabolic process	82	2	6.36	2401	0.98975	1
GO:0006026	aminoglycan catabolic process	29	1	2.25	2032	0.9042	1
GO:0006029	proteoglycan metabolic process	18	1	1.4	1641	0.76652	1
GO:0006040	amino sugar metabolic process	67	3	5.2	2021	0.90133	1
GO:0006066	alcohol metabolic process	61	3	4.73	1884	0.86249	1
GO:0006073	cellular glucan metabolic process	24	1	1.86	1864	0.85635	1
GO:0006082	organic acid metabolic process	334	23	25.9	1618	0.75764	1
GO:0006091	generation of precursor metabolites and energy	151	6	11.71	2343	0.98039	1
GO:0006101	citrate metabolic process	32	4	2.48	495	0.23349	1
GO:0006109	regulation of carbohydrate metabolic process	21	1	1.63	1764	0.81685	1
GO:0006112	energy reserve metabolic process	24	1	1.86	1865	0.85635	1
GO:0006140	regulation of nucleotide metabolic process	13	1	1.01	1370	0.65014	1
GO:0006144	purine nucleobase metabolic process	14	2	1.09	561	0.29682	1
GO:0006152	purine nucleoside catabolic process	9	1	0.7	1044	0.51658	1
GO:0006164	purine nucleotide biosynthetic process	75	3	5.82	2156	0.93771	1
GO:0006220	pyrimidine nucleotide metabolic process	13	1	1.01	1371	0.65014	1
GO:0006221	pyrimidine nucleotide biosynthetic process	13	1	1.01	1372	0.65014	1
GO:0006259	DNA metabolic process	283	67	21.95	1	1.9e-17	1
GO:0006271	DNA strand elongation involved in DNA replication	15	4	1.16	172	0.02452	1
GO:0006275	regulation of DNA replication	27	6	2.09	154	0.01537	1
GO:0006278	RNA-dependent DNA biosynthetic process	5	1	0.39	659	0.33215	1
GO:0006313	transposition, DNA-mediated	7	1	0.54	873	0.43179	1
GO:0006323	DNA packaging	86	21	6.67	27	1.6e-06	1
GO:0006352	DNA-templated transcription, initiation	85	5	6.59	1711	0.79918	1
GO:0006354	DNA-templated transcription, elongation	34	1	2.64	2144	0.93613	1
GO:0006356	regulation of transcription by RNA polymerase I	6	1	0.47	773	0.38398	1
GO:0006360	transcription by RNA polymerase I	13	1	1.01	1373	0.65014	1
GO:0006364	rRNA processing	132	1	10.24	2557	0.99998	1
GO:0006368	transcription elongation from RNA polymerase II promoter	30	1	2.33	2056	0.91166	1
GO:0006399	tRNA metabolic process	120	3	9.31	2470	0.99637	1
GO:0006403	RNA localization	166	12	12.87	1347	0.64386	1
GO:0006405	RNA export from nucleus	61	2	4.73	2215	0.95604	1
GO:0006406	mRNA export from nucleus	33	2	2.56	1562	0.73765	1
GO:0006412	translation	396	11	30.71	2562	1	1
GO:0006473	protein acetylation	79	7	6.13	830	0.41472	1
GO:0006475	internal protein amino acid acetylation	75	7	5.82	702	0.36262	1
GO:0006476	protein deacetylation	13	1	1.01	1374	0.65014	1
GO:0006479	protein methylation	69	3	5.35	2060	0.9119	1
GO:0006482	protein demethylation	8	1	0.62	961	0.47589	1
GO:0006486	protein glycosylation	80	3	6.2	2207	0.95368	1
GO:0006497	protein lipidation	54	3	4.19	1712	0.80079	1
GO:0006505	GPI anchor metabolic process	28	3	2.17	710	0.37138	1
GO:0006518	peptide metabolic process	497	14	38.54	2566	1	1
GO:0006555	methionine metabolic process	16	1	1.24	1531	0.72551	1
GO:0006575	cellular modified amino acid metabolic process	63	1	4.89	2434	0.99395	1
GO:0006582	melanin metabolic process	49	4	3.8	1100	0.53359	1
GO:0006584	catecholamine metabolic process	14	2	1.09	562	0.29682	1
GO:0006606	protein import into nucleus	57	3	4.42	1798	0.82965	1
GO:0006611	protein export from nucleus	56	2	4.34	2160	0.93854	1
GO:0006633	fatty acid biosynthetic process	34	1	2.64	2145	0.93613	1
GO:0006637	acyl-CoA metabolic process	34	1	2.64	2146	0.93613	1
GO:0006638	neutral lipid metabolic process	31	1	2.4	2092	0.91854	1
GO:0006639	acylglycerol metabolic process	31	1	2.4	2093	0.91854	1
GO:0006641	triglyceride metabolic process	28	1	2.17	1999	0.89611	1
GO:0006643	membrane lipid metabolic process	89	5	6.9	1802	0.83051	1
GO:0006650	glycerophospholipid metabolic process	81	5	6.28	1620	0.76348	1
GO:0006661	phosphatidylinositol biosynthetic process	35	3	2.71	1070	0.51725	1
GO:0006664	glycolipid metabolic process	50	4	3.88	1123	0.54991	1
GO:0006665	sphingolipid metabolic process	54	2	4.19	2124	0.92983	1
GO:0006672	ceramide metabolic process	20	1	1.55	1722	0.80141	1
GO:0006687	glycosphingolipid metabolic process	17	1	1.32	1579	0.74684	1
GO:0006720	isoprenoid metabolic process	22	1	1.71	1811	0.8311	1
GO:0006721	terpenoid metabolic process	10	1	0.78	1154	0.55411	1
GO:0006725	cellular aromatic compound metabolic process	2055	180	159.35	175	0.02591	1
GO:0006726	eye pigment biosynthetic process	34	3	2.64	1007	0.49743	1
GO:0006732	coenzyme metabolic process	120	2	9.31	2526	0.99936	1
GO:0006753	nucleoside phosphate metabolic process	197	7	15.28	2455	0.99541	1
GO:0006754	ATP biosynthetic process	38	1	2.95	2212	0.95383	1
GO:0006766	vitamin metabolic process	12	2	0.93	506	0.2374	1
GO:0006767	water-soluble vitamin metabolic process	10	1	0.78	1155	0.55411	1
GO:0006790	sulfur compound metabolic process	128	3	9.93	2488	0.99788	1
GO:0006810	transport	1370	81	106.24	2499	0.9985	1
GO:0006812	cation transport	209	11	16.21	2162	0.93969	1
GO:0006813	potassium ion transport	46	2	3.57	1945	0.88201	1
GO:0006814	sodium ion transport	27	1	2.09	1973	0.88734	1
GO:0006816	calcium ion transport	48	2	3.72	2007	0.89621	1
GO:0006821	chloride transport	33	3	2.56	983	0.47722	1
GO:0006829	zinc ion transport	12	1	0.93	1297	0.62067	1
GO:0006839	mitochondrial transport	77	1	5.97	2491	0.99807	1
GO:0006865	amino acid transport	39	6	3.02	298	0.0776	1
GO:0006869	lipid transport	58	2	4.5	2189	0.94622	1
GO:0006873	cellular ion homeostasis	106	7	8.22	1521	0.72493	1
GO:0006882	cellular zinc ion homeostasis	9	1	0.7	1045	0.51658	1
GO:0006885	regulation of pH	33	1	2.56	2130	0.93073	1
GO:0006887	exocytosis	78	2	6.05	2381	0.98641	1
GO:0006892	post-Golgi vesicle-mediated transport	27	2	2.09	1336	0.63065	1
GO:0006893	Golgi to plasma membrane transport	14	2	1.09	563	0.29682	1
GO:0006898	receptor-mediated endocytosis	33	1	2.56	2131	0.93073	1
GO:0006906	vesicle fusion	60	1	4.65	2418	0.99228	1
GO:0006914	autophagy	140	3	10.86	2513	0.99907	1
GO:0006928	movement of cell or subcellular component	532	39	41.25	1434	0.67273	1
GO:0006935	chemotaxis	233	10	18.07	2397	0.9889	1
GO:0006949	syncytium formation	44	1	3.41	2303	0.97163	1
GO:0006950	response to stress	956	85	74.13	319	0.09095	1
GO:0006955	immune response	246	12	19.08	2314	0.97339	1
GO:0006963	positive regulation of antibacterial peptide biosynthetic process	15	1	1.16	1484	0.70239	1
GO:0006986	response to unfolded protein	29	1	2.25	2033	0.9042	1
GO:0006996	organelle organization	1453	143	112.67	60	0.00071	1
GO:0007020	microtubule nucleation	12	1	0.93	1298	0.62067	1
GO:0007028	cytoplasm organization	68	3	5.27	2041	0.90675	1
GO:0007033	vacuole organization	50	2	3.88	2046	0.90881	1
GO:0007043	cell-cell junction assembly	51	1	3.95	2362	0.98394	1
GO:0007049	cell cycle	646	104	50.09	5	6.9e-14	1
GO:0007051	spindle organization	108	18	8.37	76	0.00149	1
GO:0007093	mitotic cell cycle checkpoint	42	10	3.26	68	0.0011	1
GO:0007127	meiosis I	50	15	3.88	30	3.2e-06	1
GO:0007154	cell communication	1452	85	112.6	2520	0.99924	1
GO:0007164	establishment of tissue polarity	88	8	6.82	719	0.37367	1
GO:0007167	enzyme linked receptor protein signaling pathway	217	8	16.83	2459	0.99574	1
GO:0007178	transmembrane receptor protein serine/threonine kinase signaling pathway	62	1	4.81	2428	0.99344	1
GO:0007187	G-protein coupled receptor signaling pathway, coupled to cyclic nucleotide second messenger	33	3	2.56	984	0.47722	1
GO:0007259	JAK-STAT cascade	37	3	2.87	1170	0.55557	1
GO:0007267	cell-cell signaling	391	25	30.32	1920	0.8728	1
GO:0007269	neurotransmitter secretion	80	4	6.2	1929	0.87764	1
GO:0007276	gamete generation	759	61	58.86	811	0.40103	1
GO:0007286	spermatid development	60	5	4.65	1016	0.50198	1
GO:0007292	female gamete generation	608	47	47.15	1099	0.53348	1
GO:0007293	germarium-derived egg chamber formation	89	8	6.9	799	0.38576	1
GO:0007297	ovarian follicle cell migration	118	4	9.15	2365	0.98466	1
GO:0007306	eggshell chorion assembly	71	5	5.51	1404	0.65398	1
GO:0007308	oocyte construction	121	8	9.38	1551	0.73142	1
GO:0007309	oocyte axis specification	118	8	9.15	1497	0.70523	1
GO:0007315	pole plasm assembly	61	3	4.73	1885	0.86249	1
GO:0007316	pole plasm RNA localization	50	3	3.88	1610	0.75607	1
GO:0007350	blastoderm segmentation	169	9	13.11	2072	0.91627	1
GO:0007351	tripartite regional subdivision	114	5	8.84	2193	0.94763	1
GO:0007354	zygotic determination of anterior/posterior axis, embryo	24	1	1.86	1866	0.85635	1
GO:0007365	periodic partitioning	36	3	2.79	1103	0.53663	1
GO:0007389	pattern specification process	403	24	31.25	2141	0.93563	1
GO:0007392	initiation of dorsal closure	16	1	1.24	1532	0.72551	1
GO:0007414	axonal defasciculation	9	1	0.7	1046	0.51658	1
GO:0007431	salivary gland development	109	5	8.45	2136	0.93283	1
GO:0007432	salivary gland boundary specification	20	1	1.55	1723	0.80141	1
GO:0007439	ectodermal digestive tract development	8	1	0.62	962	0.47589	1
GO:0007442	hindgut morphogenesis	46	5	3.57	550	0.28344	1
GO:0007448	anterior/posterior pattern specification, imaginal disc	16	1	1.24	1533	0.72551	1
GO:0007450	dorsal/ventral pattern formation, imaginal disc	45	3	3.49	1468	0.68921	1
GO:0007472	wing disc morphogenesis	226	12	17.53	2175	0.94263	1
GO:0007478	leg disc morphogenesis	67	1	5.2	2456	0.99563	1
GO:0007492	endoderm development	6	1	0.47	774	0.38398	1
GO:0007548	sex differentiation	80	2	6.2	2394	0.9882	1
GO:0007549	dosage compensation	17	1	1.32	1580	0.74684	1
GO:0007560	imaginal disc morphogenesis	312	17	24.19	2230	0.95769	1
GO:0007562	eclosion	16	1	1.24	1534	0.72551	1
GO:0007564	regulation of chitin-based cuticle tanning	10	3	0.78	204	0.03688	1
GO:0007568	aging	140	9	10.86	1668	0.76817	1
GO:0007586	digestion	6	1	0.47	775	0.38398	1
GO:0007593	chitin-based cuticle sclerotization	29	4	2.25	454	0.18368	1
GO:0007600	sensory perception	206	10	15.97	2263	0.9639	1
GO:0007602	phototransduction	51	1	3.95	2363	0.98394	1
GO:0007610	behavior	423	22	32.8	2384	0.98663	1
GO:0007611	learning or memory	139	7	10.78	2104	0.92232	1
GO:0007612	learning	57	2	4.42	2174	0.9425	1
GO:0007618	mating	75	4	5.82	1828	0.84393	1
GO:0007619	courtship behavior	50	3	3.88	1611	0.75607	1
GO:0007622	rhythmic behavior	86	4	6.67	2050	0.90961	1
GO:0007631	feeding behavior	33	2	2.56	1563	0.73765	1
GO:0007635	chemosensory behavior	64	3	4.96	1952	0.88334	1
GO:0008015	blood circulation	28	3	2.17	711	0.37138	1
GO:0008016	regulation of heart contraction	20	1	1.55	1724	0.80141	1
GO:0008033	tRNA processing	71	1	5.51	2472	0.99685	1
GO:0008038	neuron recognition	85	4	6.59	2039	0.90486	1
GO:0008052	sensory organ boundary specification	15	5	1.16	104	0.0043	1
GO:0008088	axo-dendritic transport	34	1	2.64	2147	0.93613	1
GO:0008150	biological_process	7299	566	566	2570	1	1
GO:0008202	steroid metabolic process	43	2	3.33	1877	0.85731	1
GO:0008213	protein alkylation	69	3	5.35	2061	0.9119	1
GO:0008214	protein dealkylation	8	1	0.62	963	0.47589	1
GO:0008272	sulfate transport	10	1	0.78	1156	0.55411	1
GO:0008299	isoprenoid biosynthetic process	16	1	1.24	1535	0.72551	1
GO:0008306	associative learning	48	2	3.72	2008	0.89621	1
GO:0008334	histone mRNA metabolic process	7	1	0.54	874	0.43179	1
GO:0008354	germ cell migration	38	2	2.95	1740	0.80552	1
GO:0008358	maternal determination of anterior/posterior axis, embryo	84	4	6.51	2016	0.89988	1
GO:0008361	regulation of cell size	86	5	6.67	1741	0.80742	1
GO:0008363	larval chitin-based cuticle development	22	2	1.71	1083	0.51775	1
GO:0008380	RNA splicing	243	11	18.84	2367	0.98485	1
GO:0008544	epidermis development	50	5	3.88	682	0.34596	1
GO:0008582	regulation of synaptic growth at neuromuscular junction	91	1	7.06	2527	0.99938	1
GO:0008595	anterior/posterior axis specification, embryo	114	5	8.84	2194	0.94763	1
GO:0008645	hexose transmembrane transport	17	4	1.32	207	0.0378	1
GO:0009056	catabolic process	768	47	59.55	2306	0.97169	1
GO:0009057	macromolecule catabolic process	399	29	30.94	1435	0.67388	1
GO:0009059	macromolecule biosynthetic process	1569	128	121.67	531	0.26548	1
GO:0009060	aerobic respiration	43	4	3.33	838	0.43035	1
GO:0009063	cellular amino acid catabolic process	39	4	3.02	696	0.35827	1
GO:0009064	glutamine family amino acid metabolic process	28	2	2.17	1399	0.65059	1
GO:0009066	aspartate family amino acid metabolic process	28	2	2.17	1400	0.65059	1
GO:0009067	aspartate family amino acid biosynthetic process	13	1	1.01	1375	0.65014	1
GO:0009069	serine family amino acid metabolic process	22	3	1.71	514	0.24084	1
GO:0009072	aromatic amino acid family metabolic process	16	2	1.24	693	0.3555	1
GO:0009100	glycoprotein metabolic process	119	7	9.23	1790	0.82628	1
GO:0009101	glycoprotein biosynthetic process	95	4	7.37	2176	0.94373	1
GO:0009112	nucleobase metabolic process	26	2	2.02	1270	0.60983	1
GO:0009117	nucleotide metabolic process	195	7	15.12	2450	0.99489	1
GO:0009119	ribonucleoside metabolic process	31	1	2.4	2094	0.91854	1
GO:0009123	nucleoside monophosphate metabolic process	123	2	9.54	2531	0.99948	1
GO:0009124	nucleoside monophosphate biosynthetic process	54	2	4.19	2125	0.92983	1
GO:0009126	purine nucleoside monophosphate metabolic process	113	1	8.76	2546	0.9999	1
GO:0009127	purine nucleoside monophosphate biosynthetic process	45	1	3.49	2316	0.97384	1
GO:0009129	pyrimidine nucleoside monophosphate metabolic process	7	1	0.54	875	0.43179	1
GO:0009132	nucleoside diphosphate metabolic process	23	1	1.78	1835	0.84423	1
GO:0009141	nucleoside triphosphate metabolic process	115	2	8.92	2512	0.99907	1
GO:0009142	nucleoside triphosphate biosynthetic process	43	1	3.33	2288	0.96923	1
GO:0009145	purine nucleoside triphosphate biosynthetic process	42	1	3.26	2273	0.96663	1
GO:0009150	purine ribonucleotide metabolic process	149	3	11.55	2532	0.9995	1
GO:0009152	purine ribonucleotide biosynthetic process	73	3	5.66	2126	0.93	1
GO:0009161	ribonucleoside monophosphate metabolic process	119	2	9.23	2522	0.99931	1
GO:0009163	nucleoside biosynthetic process	20	1	1.55	1725	0.80141	1
GO:0009164	nucleoside catabolic process	11	1	0.85	1237	0.58873	1
GO:0009165	nucleotide biosynthetic process	98	5	7.6	1963	0.88656	1
GO:0009167	purine ribonucleoside monophosphate metabolic process	113	1	8.76	2547	0.9999	1
GO:0009168	purine ribonucleoside monophosphate biosynthetic process	45	1	3.49	2317	0.97384	1
GO:0009187	cyclic nucleotide metabolic process	22	2	1.71	1084	0.51775	1
GO:0009190	cyclic nucleotide biosynthetic process	17	2	1.32	792	0.3842	1
GO:0009199	ribonucleoside triphosphate metabolic process	111	1	8.61	2543	0.99988	1
GO:0009201	ribonucleoside triphosphate biosynthetic process	42	1	3.26	2274	0.96663	1
GO:0009205	purine ribonucleoside triphosphate metabolic process	111	1	8.61	2544	0.99988	1
GO:0009206	purine ribonucleoside triphosphate biosynthetic process	42	1	3.26	2275	0.96663	1
GO:0009218	pyrimidine ribonucleotide metabolic process	7	1	0.54	876	0.43179	1
GO:0009225	nucleotide-sugar metabolic process	17	1	1.32	1581	0.74684	1
GO:0009247	glycolipid biosynthetic process	39	3	3.02	1256	0.59201	1
GO:0009259	ribonucleotide metabolic process	154	4	11.94	2496	0.99833	1
GO:0009260	ribonucleotide biosynthetic process	78	4	6.05	1890	0.86499	1
GO:0009262	deoxyribonucleotide metabolic process	9	2	0.7	405	0.1504	1
GO:0009308	amine metabolic process	21	2	1.63	999	0.49258	1
GO:0009309	amine biosynthetic process	7	1	0.54	877	0.43179	1
GO:0009311	oligosaccharide metabolic process	25	1	1.94	1909	0.86753	1
GO:0009404	toxin metabolic process	10	2	0.78	444	0.17878	1
GO:0009407	toxin catabolic process	8	1	0.62	964	0.47589	1
GO:0009409	response to cold	10	3	0.78	205	0.03688	1
GO:0009410	response to xenobiotic stimulus	29	5	2.25	272	0.06946	1
GO:0009416	response to light stimulus	127	6	9.85	2153	0.9363	1
GO:0009451	RNA modification	88	4	6.82	2086	0.91849	1
GO:0009453	energy taxis	20	2	1.55	919	0.46659	1
GO:0009581	detection of external stimulus	71	1	5.51	2473	0.99685	1
GO:0009582	detection of abiotic stimulus	71	1	5.51	2474	0.99685	1
GO:0009583	detection of light stimulus	58	1	4.5	2410	0.99091	1
GO:0009584	detection of visible light	33	1	2.56	2132	0.93073	1
GO:0009589	detection of UV	6	1	0.47	776	0.38398	1
GO:0009605	response to external stimulus	721	39	55.91	2465	0.99611	1
GO:0009607	response to biotic stimulus	269	14	20.86	2256	0.9626	1
GO:0009611	response to wounding	104	2	8.06	2489	0.9979	1
GO:0009615	response to virus	44	2	3.41	1896	0.86603	1
GO:0009617	response to bacterium	170	12	13.18	1439	0.67637	1
GO:0009620	response to fungus	49	2	3.8	2022	0.9027	1
GO:0009628	response to abiotic stimulus	350	22	27.14	1939	0.87823	1
GO:0009653	anatomical structure morphogenesis	1229	88	95.3	1780	0.8188	1
GO:0009712	catechol-containing compound metabolic process	14	2	1.09	564	0.29682	1
GO:0009713	catechol-containing compound biosynthetic process	5	1	0.39	660	0.33215	1
GO:0009719	response to endogenous stimulus	184	5	14.27	2511	0.99903	1
GO:0009725	response to hormone	108	4	8.37	2309	0.97263	1
GO:0009743	response to carbohydrate	17	1	1.32	1582	0.74684	1
GO:0009755	hormone-mediated signaling pathway	35	1	2.71	2166	0.9411	1
GO:0009790	embryo development	445	36	34.51	832	0.41943	1
GO:0009791	post-embryonic development	502	24	38.93	2484	0.99765	1
GO:0009792	embryo development ending in birth or egg hatching	157	13	12.17	906	0.44487	1
GO:0009798	axis specification	176	11	13.65	1754	0.81372	1
GO:0009799	specification of symmetry	12	1	0.93	1299	0.62067	1
GO:0009826	unidimensional cell growth	21	1	1.63	1765	0.81685	1
GO:0009886	post-embryonic animal morphogenesis	369	18	28.61	2404	0.99045	1
GO:0009889	regulation of biosynthetic process	1065	96	82.59	253	0.05667	1
GO:0009890	negative regulation of biosynthetic process	364	37	28.23	245	0.05211	1
GO:0009891	positive regulation of biosynthetic process	385	28	29.85	1432	0.67048	1
GO:0009892	negative regulation of metabolic process	628	49	48.7	1020	0.50506	1
GO:0009893	positive regulation of metabolic process	647	50	50.17	1101	0.53413	1
GO:0009894	regulation of catabolic process	169	8	13.11	2220	0.95695	1
GO:0009896	positive regulation of catabolic process	78	7	6.05	812	0.40169	1
GO:0009913	epidermal cell differentiation	42	5	3.26	493	0.22351	1
GO:0009948	anterior/posterior axis specification	123	8	9.54	1598	0.74798	1
GO:0009950	dorsal/ventral axis specification	70	8	5.43	427	0.1729	1
GO:0009952	anterior/posterior pattern specification	148	9	11.48	1784	0.82112	1
GO:0009953	dorsal/ventral pattern formation	129	11	10	831	0.41723	1
GO:0009966	regulation of signal transduction	645	33	50.02	2486	0.99772	1
GO:0009967	positive regulation of signal transduction	292	19	22.64	1785	0.82169	1
GO:0009987	cellular process	5560	416	431.15	2181	0.94481	1
GO:0009991	response to extracellular stimulus	126	10	9.77	1088	0.51785	1
GO:0009994	oocyte differentiation	155	11	12.02	1420	0.66564	1
GO:0010001	glial cell differentiation	35	2	2.71	1661	0.76693	1
GO:0010035	response to inorganic substance	45	3	3.49	1469	0.68921	1
GO:0010043	response to zinc ion	11	1	0.85	1238	0.58873	1
GO:0010160	formation of animal organ boundary	35	6	2.71	228	0.04997	1
GO:0010166	wax metabolic process	13	1	1.01	1376	0.65014	1
GO:0010243	response to organonitrogen compound	102	6	7.91	1752	0.81329	1
GO:0010256	endomembrane system organization	142	6	11.01	2287	0.96906	1
GO:0010259	multicellular organism aging	137	9	10.62	1570	0.74568	1
GO:0010324	membrane invagination	18	1	1.4	1642	0.76652	1
GO:0010332	response to gamma radiation	18	1	1.4	1643	0.76652	1
GO:0010453	regulation of cell fate commitment	28	3	2.17	712	0.37138	1
GO:0010454	negative regulation of cell fate commitment	18	3	1.4	419	0.15911	1
GO:0010466	negative regulation of peptidase activity	23	1	1.78	1836	0.84423	1
GO:0010467	gene expression	1866	121	144.7	2425	0.99315	1
GO:0010498	proteasomal protein catabolic process	169	14	13.11	897	0.43896	1
GO:0010508	positive regulation of autophagy	28	1	2.17	2000	0.89611	1
GO:0010528	regulation of transposition	15	3	1.16	356	0.105	1
GO:0010556	regulation of macromolecule biosynthetic process	1026	93	79.56	248	0.05371	1
GO:0010557	positive regulation of macromolecule biosynthetic process	356	26	27.61	1412	0.65777	1
GO:0010558	negative regulation of macromolecule biosynthetic process	353	36	27.37	247	0.05273	1
GO:0010562	positive regulation of phosphorus metabolic process	146	11	11.32	1205	0.5856	1
GO:0010563	negative regulation of phosphorus metabolic process	74	1	5.74	2479	0.99753	1
GO:0010604	positive regulation of macromolecule metabolic process	595	49	46.14	683	0.34692	1
GO:0010605	negative regulation of macromolecule metabolic process	594	48	46.06	813	0.40206	1
GO:0010608	posttranscriptional regulation of gene expression	171	10	13.26	1889	0.86403	1
GO:0010623	programmed cell death involved in cell development	92	2	7.13	2451	0.99498	1
GO:0010631	epithelial cell migration	146	5	11.32	2406	0.99064	1
GO:0010639	negative regulation of organelle organization	80	9	6.2	422	0.16519	1
GO:0010646	regulation of cell communication	724	40	56.14	2441	0.99433	1
GO:0010647	positive regulation of cell communication	311	20	24.12	1826	0.8417	1
GO:0010648	negative regulation of cell communication	278	16	21.56	2102	0.92194	1
GO:0010675	regulation of cellular carbohydrate metabolic process	15	1	1.16	1485	0.70239	1
GO:0010721	negative regulation of cell development	67	1	5.2	2457	0.99563	1
GO:0010769	regulation of cell morphogenesis involved in differentiation	64	2	4.96	2264	0.96414	1
GO:0010770	positive regulation of cell morphogenesis involved in differentiation	24	2	1.86	1180	0.56554	1
GO:0010817	regulation of hormone levels	61	2	4.73	2216	0.95604	1
GO:0010833	telomere maintenance via telomere lengthening	5	1	0.39	661	0.33215	1
GO:0010847	regulation of chromatin assembly	12	2	0.93	507	0.2374	1
GO:0010876	lipid localization	100	3	7.75	2382	0.98659	1
GO:0010883	regulation of lipid storage	29	1	2.25	2034	0.9042	1
GO:0010906	regulation of glucose metabolic process	11	1	0.85	1239	0.58873	1
GO:0010927	cellular component assembly involved in morphogenesis	125	14	9.69	351	0.10346	1
GO:0010942	positive regulation of cell death	72	6	5.58	994	0.48973	1
GO:0010950	positive regulation of endopeptidase activity	22	4	1.71	304	0.08576	1
GO:0010959	regulation of metal ion transport	32	2	2.48	1515	0.72187	1
GO:0010965	regulation of mitotic sister chromatid separation	30	7	2.33	118	0.00686	1
GO:0010970	transport along microtubule	52	4	4.03	1196	0.58161	1
GO:0010972	negative regulation of G2/M transition of mitotic cell cycle	17	4	1.32	208	0.0378	1
GO:0010975	regulation of neuron projection development	80	2	6.2	2395	0.9882	1
GO:0010976	positive regulation of neuron projection development	30	2	2.33	1463	0.6879	1
GO:0012501	programmed cell death	291	17	22.57	2079	0.91718	1
GO:0014070	response to organic cyclic compound	103	7	7.99	1473	0.69662	1
GO:0014074	response to purine-containing compound	10	3	0.78	206	0.03688	1
GO:0014706	striated muscle tissue development	22	1	1.71	1812	0.8311	1
GO:0014902	myotube differentiation	47	1	3.64	2332	0.97777	1
GO:0015012	heparan sulfate proteoglycan biosynthetic process	13	1	1.01	1377	0.65014	1
GO:0015698	inorganic anion transport	40	3	3.1	1268	0.6095	1
GO:0015711	organic anion transport	127	13	9.85	457	0.18433	1
GO:0015749	monosaccharide transmembrane transport	17	4	1.32	209	0.0378	1
GO:0015833	peptide transport	386	12	29.93	2553	0.99997	1
GO:0015849	organic acid transport	65	6	5.04	802	0.3913	1
GO:0015850	organic hydroxy compound transport	26	2	2.02	1271	0.60983	1
GO:0015931	nucleobase-containing compound transport	114	4	8.84	2344	0.98061	1
GO:0015980	energy derivation by oxidation of organic compounds	120	6	9.31	2062	0.91239	1
GO:0015985	energy coupled proton transport, down electrochemical gradient	18	1	1.4	1644	0.76652	1
GO:0015988	energy coupled proton transmembrane transport, against electrochemical gradient	21	3	1.63	491	0.21969	1
GO:0016043	cellular component organization	2219	177	172.07	674	0.33522	1
GO:0016049	cell growth	137	7	10.62	2069	0.9154	1
GO:0016050	vesicle organization	108	2	8.37	2498	0.99843	1
GO:0016051	carbohydrate biosynthetic process	47	4	3.64	1013	0.50011	1
GO:0016052	carbohydrate catabolic process	39	2	3.02	1778	0.81706	1
GO:0016053	organic acid biosynthetic process	100	5	7.75	2014	0.8966	1
GO:0016054	organic acid catabolic process	86	6	6.67	1423	0.66582	1
GO:0016070	RNA metabolic process	1519	113	117.79	1504	0.71373	1
GO:0016071	mRNA metabolic process	338	16	26.21	2412	0.99095	1
GO:0016072	rRNA metabolic process	140	2	10.86	2541	0.99986	1
GO:0016073	snRNA metabolic process	35	3	2.71	1071	0.51725	1
GO:0016074	snoRNA metabolic process	9	1	0.7	1047	0.51658	1
GO:0016197	endosomal transport	87	1	6.75	2515	0.99915	1
GO:0016198	axon choice point recognition	21	1	1.63	1766	0.81685	1
GO:0016203	muscle attachment	34	1	2.64	2148	0.93613	1
GO:0016236	macroautophagy	70	2	5.43	2325	0.97625	1
GO:0016241	regulation of macroautophagy	24	1	1.86	1867	0.85635	1
GO:0016246	RNA interference	30	2	2.33	1464	0.6879	1
GO:0016310	phosphorylation	503	31	39.01	2138	0.93286	1
GO:0016331	morphogenesis of embryonic epithelium	108	6	8.37	1851	0.85333	1
GO:0016333	morphogenesis of follicular epithelium	46	1	3.57	2323	0.97589	1
GO:0016358	dendrite development	139	7	10.78	2105	0.92232	1
GO:0016441	posttranscriptional gene silencing	53	3	4.11	1697	0.7903	1
GO:0016545	male courtship behavior, veined wing vibration	18	1	1.4	1645	0.76652	1
GO:0016556	mRNA modification	11	2	0.85	484	0.20787	1
GO:0016569	covalent chromatin modification	176	14	13.65	1015	0.50143	1
GO:0016570	histone modification	172	14	13.34	913	0.46585	1
GO:0016571	histone methylation	61	3	4.73	1886	0.86249	1
GO:0016577	histone demethylation	7	1	0.54	878	0.43179	1
GO:0017038	protein import	81	3	6.28	2218	0.95638	1
GO:0017085	response to insecticide	14	3	1.09	315	0.0889	1
GO:0017145	stem cell division	84	7	6.51	988	0.4793	1
GO:0017156	calcium ion regulated exocytosis	48	2	3.72	2009	0.89621	1
GO:0017157	regulation of exocytosis	24	1	1.86	1868	0.85635	1
GO:0018022	peptidyl-lysine methylation	46	3	3.57	1495	0.70359	1
GO:0018108	peptidyl-tyrosine phosphorylation	29	1	2.25	2035	0.9042	1
GO:0018130	heterocycle biosynthetic process	1147	101	88.94	302	0.08384	1
GO:0018205	peptidyl-lysine modification	133	12	10.31	673	0.33515	1
GO:0018209	peptidyl-serine modification	49	1	3.8	2347	0.9811	1
GO:0018212	peptidyl-tyrosine modification	30	1	2.33	2057	0.91166	1
GO:0018393	internal peptidyl-lysine acetylation	75	7	5.82	703	0.36262	1
GO:0018394	peptidyl-lysine acetylation	75	7	5.82	704	0.36262	1
GO:0018904	ether metabolic process	7	2	0.54	335	0.09713	1
GO:0018958	phenol-containing compound metabolic process	61	5	4.73	1062	0.51693	1
GO:0019094	pole plasm mRNA localization	50	3	3.88	1612	0.75607	1
GO:0019098	reproductive behavior	84	4	6.51	2017	0.89988	1
GO:0019219	regulation of nucleobase-containing compound metabolic process	1015	93	78.71	214	0.04267	1
GO:0019220	regulation of phosphate metabolic process	254	14	19.7	2154	0.93643	1
GO:0019222	regulation of metabolic process	1646	130	127.64	833	0.4197	1
GO:0019318	hexose metabolic process	42	4	3.26	826	0.41247	1
GO:0019319	hexose biosynthetic process	9	1	0.7	1048	0.51658	1
GO:0019368	fatty acid elongation, unsaturated fatty acid	13	1	1.01	1378	0.65014	1
GO:0019377	glycolipid catabolic process	9	1	0.7	1049	0.51658	1
GO:0019395	fatty acid oxidation	35	1	2.71	2167	0.9411	1
GO:0019400	alditol metabolic process	8	1	0.62	965	0.47589	1
GO:0019438	aromatic compound biosynthetic process	1143	103	88.63	227	0.0494	1
GO:0019538	protein metabolic process	1877	106	145.55	2558	0.99998	1
GO:0019637	organophosphate metabolic process	339	15	26.29	2458	0.99564	1
GO:0019692	deoxyribose phosphate metabolic process	6	1	0.47	777	0.38398	1
GO:0019693	ribose phosphate metabolic process	159	4	12.33	2504	0.99879	1
GO:0019725	cellular homeostasis	190	12	14.73	1746	0.81108	1
GO:0019730	antimicrobial humoral response	73	2	5.66	2345	0.98071	1
GO:0019748	secondary metabolic process	82	6	6.36	1280	0.61948	1
GO:0019751	polyol metabolic process	30	2	2.33	1465	0.6879	1
GO:0019752	carboxylic acid metabolic process	316	22	24.5	1559	0.73553	1
GO:0019827	stem cell population maintenance	81	7	6.28	903	0.44071	1
GO:0019915	lipid storage	44	1	3.41	2304	0.97163	1
GO:0019932	second-messenger-mediated signaling	53	2	4.11	2116	0.92505	1
GO:0019933	cAMP-mediated signaling	25	1	1.94	1910	0.86753	1
GO:0019935	cyclic-nucleotide-mediated signaling	34	2	2.64	1603	0.75266	1
GO:0019941	modification-dependent protein catabolic process	206	15	15.97	1341	0.6402	1
GO:0019953	sexual reproduction	829	65	64.28	989	0.48217	1
GO:0021700	developmental maturation	205	12	15.9	1943	0.88123	1
GO:0022402	cell cycle process	482	90	37.38	2	5e-16	1
GO:0022406	membrane docking	28	1	2.17	2001	0.89611	1
GO:0022412	cellular process involved in reproduction in multicellular organism	726	60	56.3	582	0.31523	1
GO:0022414	reproductive process	924	79	71.65	452	0.18296	1
GO:0022607	cellular component assembly	945	67	73.28	1745	0.81083	1
GO:0022610	biological adhesion	159	12	12.33	1202	0.58312	1
GO:0022612	gland morphogenesis	81	4	6.28	1958	0.88357	1
GO:0022613	ribonucleoprotein complex biogenesis	272	4	21.09	2565	1	1
GO:0022616	DNA strand elongation	15	4	1.16	173	0.02452	1
GO:0022898	regulation of transmembrane transporter activity	15	1	1.16	1486	0.70239	1
GO:0023014	signal transduction by protein phosphorylation	151	9	11.71	1824	0.83841	1
GO:0023051	regulation of signaling	730	40	56.61	2454	0.99529	1
GO:0023056	positive regulation of signaling	311	20	24.12	1827	0.8417	1
GO:0023057	negative regulation of signaling	278	16	21.56	2103	0.92194	1
GO:0023061	signal release	105	5	8.14	2085	0.91841	1
GO:0030001	metal ion transport	140	5	10.86	2385	0.98688	1
GO:0030003	cellular cation homeostasis	102	7	7.91	1458	0.68678	1
GO:0030029	actin filament-based process	250	25	19.39	361	0.11168	1
GO:0030030	cell projection organization	496	28	38.46	2322	0.97568	1
GO:0030031	cell projection assembly	101	8	7.83	1093	0.52893	1
GO:0030036	actin cytoskeleton organization	238	23	18.46	416	0.15906	1
GO:0030038	contractile actin filament bundle assembly	7	1	0.54	879	0.43179	1
GO:0030048	actin filament-based movement	26	3	2.02	597	0.3277	1
GO:0030100	regulation of endocytosis	52	2	4.03	2099	0.91997	1
GO:0030111	regulation of Wnt signaling pathway	75	6	5.82	1096	0.53042	1
GO:0030149	sphingolipid catabolic process	16	1	1.24	1536	0.72551	1
GO:0030155	regulation of cell adhesion	40	1	3.1	2241	0.96075	1
GO:0030166	proteoglycan biosynthetic process	18	1	1.4	1646	0.76652	1
GO:0030177	positive regulation of Wnt signaling pathway	35	2	2.71	1662	0.76693	1
GO:0030178	negative regulation of Wnt signaling pathway	29	4	2.25	455	0.18368	1
GO:0030201	heparan sulfate proteoglycan metabolic process	13	1	1.01	1379	0.65014	1
GO:0030258	lipid modification	78	3	6.05	2196	0.94781	1
GO:0030497	fatty acid elongation	17	1	1.32	1583	0.74684	1
GO:0030516	regulation of axon extension	20	2	1.55	920	0.46659	1
GO:0030534	adult behavior	124	8	9.62	1608	0.75599	1
GO:0030537	larval behavior	35	1	2.71	2168	0.9411	1
GO:0030588	pseudocleavage	10	1	0.78	1157	0.55411	1
GO:0030641	regulation of cellular pH	33	1	2.56	2133	0.93073	1
GO:0030703	eggshell formation	107	7	8.3	1558	0.73395	1
GO:0030716	oocyte fate determination	34	3	2.64	1008	0.49743	1
GO:0030808	regulation of nucleotide biosynthetic process	8	1	0.62	966	0.47589	1
GO:0030810	positive regulation of nucleotide biosynthetic process	5	1	0.39	662	0.33215	1
GO:0030855	epithelial cell differentiation	347	25	26.91	1456	0.68263	1
GO:0030859	polarized epithelial cell differentiation	10	1	0.78	1158	0.55411	1
GO:0030865	cortical cytoskeleton organization	60	5	4.65	1017	0.50198	1
GO:0031032	actomyosin structure organization	86	14	6.67	110	0.00599	1
GO:0031033	myosin filament organization	13	3	1.01	292	0.07395	1
GO:0031038	myosin II filament organization	8	1	0.62	967	0.47589	1
GO:0031047	gene silencing by RNA	64	3	4.96	1953	0.88334	1
GO:0031050	dsRNA fragmentation	21	1	1.63	1767	0.81685	1
GO:0031056	regulation of histone modification	45	3	3.49	1470	0.68921	1
GO:0031058	positive regulation of histone modification	17	1	1.32	1584	0.74684	1
GO:0031060	regulation of histone methylation	26	1	2.02	1934	0.87783	1
GO:0031099	regeneration	23	1	1.78	1837	0.84423	1
GO:0031109	microtubule polymerization or depolymerization	37	5	2.87	412	0.15522	1
GO:0031110	regulation of microtubule polymerization or depolymerization	18	2	1.4	822	0.41234	1
GO:0031111	negative regulation of microtubule polymerization or depolymerization	11	1	0.85	1240	0.58873	1
GO:0031114	regulation of microtubule depolymerization	13	1	1.01	1380	0.65014	1
GO:0031123	RNA 3'-end processing	70	3	5.43	2076	0.91678	1
GO:0031124	mRNA 3'-end processing	40	1	3.1	2242	0.96075	1
GO:0031125	rRNA 3'-end processing	10	1	0.78	1159	0.55411	1
GO:0031175	neuron projection development	388	16	30.09	2508	0.99895	1
GO:0031323	regulation of cellular metabolic process	1501	122	116.39	555	0.28809	1
GO:0031324	negative regulation of cellular metabolic process	510	43	39.55	569	0.30079	1
GO:0031325	positive regulation of cellular metabolic process	609	46	47.22	1261	0.60087	1
GO:0031326	regulation of cellular biosynthetic process	1060	96	82.2	230	0.05127	1
GO:0031328	positive regulation of cellular biosynthetic process	385	28	29.85	1433	0.67048	1
GO:0031329	regulation of cellular catabolic process	148	7	11.48	2195	0.94769	1
GO:0031331	positive regulation of cellular catabolic process	64	6	4.96	727	0.37707	1
GO:0031334	positive regulation of protein complex assembly	53	1	4.11	2378	0.98635	1
GO:0031344	regulation of cell projection organization	110	2	8.53	2502	0.99865	1
GO:0031346	positive regulation of cell projection organization	52	2	4.03	2100	0.91997	1
GO:0031347	regulation of defense response	115	4	8.92	2353	0.98171	1
GO:0031348	negative regulation of defense response	32	1	2.48	2111	0.92488	1
GO:0031349	positive regulation of defense response	66	3	5.12	1991	0.89563	1
GO:0031396	regulation of protein ubiquitination	27	3	2.09	686	0.34958	1
GO:0031398	positive regulation of protein ubiquitination	12	1	0.93	1300	0.62067	1
GO:0031399	regulation of protein modification process	296	21	22.95	1475	0.69974	1
GO:0031400	negative regulation of protein modification process	84	5	6.51	1703	0.79068	1
GO:0031401	positive regulation of protein modification process	166	13	12.87	1091	0.52779	1
GO:0031497	chromatin assembly	40	8	3.1	139	0.01042	1
GO:0031503	protein-containing complex localization	66	4	5.12	1621	0.7638	1
GO:0031507	heterochromatin assembly	18	2	1.4	823	0.41234	1
GO:0031570	DNA integrity checkpoint	37	10	2.87	50	0.00037	1
GO:0031572	G2 DNA damage checkpoint	11	3	0.85	223	0.04786	1
GO:0031589	cell-substrate adhesion	19	1	1.47	1687	0.78467	1
GO:0031644	regulation of neurological system process	13	1	1.01	1381	0.65014	1
GO:0031667	response to nutrient levels	124	10	9.62	1005	0.49697	1
GO:0031668	cellular response to extracellular stimulus	63	2	4.89	2252	0.96161	1
GO:0031669	cellular response to nutrient levels	61	2	4.73	2217	0.95604	1
GO:0031929	TOR signaling	56	4	4.34	1342	0.64098	1
GO:0032008	positive regulation of TOR signaling	28	1	2.17	2002	0.89611	1
GO:0032042	mitochondrial DNA metabolic process	6	1	0.47	778	0.38398	1
GO:0032101	regulation of response to external stimulus	112	3	8.69	2431	0.99384	1
GO:0032103	positive regulation of response to external stimulus	43	2	3.33	1878	0.85731	1
GO:0032119	sequestering of zinc ion	5	1	0.39	663	0.33215	1
GO:0032196	transposition	16	3	1.24	367	0.12214	1
GO:0032200	telomere organization	29	8	2.25	71	0.00124	1
GO:0032259	methylation	114	6	8.84	1961	0.88606	1
GO:0032268	regulation of cellular protein metabolic process	514	38	39.86	1392	0.65016	1
GO:0032269	negative regulation of cellular protein metabolic process	189	12	14.66	1736	0.80549	1
GO:0032270	positive regulation of cellular protein metabolic process	246	21	19.08	690	0.3545	1
GO:0032271	regulation of protein polymerization	57	1	4.42	2402	0.99014	1
GO:0032386	regulation of intracellular transport	47	2	3.64	1982	0.88932	1
GO:0032392	DNA geometric change	11	1	0.85	1241	0.58873	1
GO:0032409	regulation of transporter activity	15	1	1.16	1487	0.70239	1
GO:0032411	positive regulation of transporter activity	7	1	0.54	880	0.43179	1
GO:0032412	regulation of ion transmembrane transporter activity	15	1	1.16	1488	0.70239	1
GO:0032434	regulation of proteasomal ubiquitin-dependent protein catabolic process	24	2	1.86	1181	0.56554	1
GO:0032446	protein modification by small protein conjugation	168	14	13.03	836	0.42998	1
GO:0032496	response to lipopolysaccharide	8	1	0.62	968	0.47589	1
GO:0032501	multicellular organismal process	2542	193	197.12	1418	0.66314	1
GO:0032502	developmental process	2185	168	169.44	1185	0.57131	1
GO:0032506	cytokinetic process	33	4	2.56	522	0.25078	1
GO:0032535	regulation of cellular component size	150	5	11.63	2422	0.99255	1
GO:0032784	regulation of DNA-templated transcription, elongation	25	1	1.94	1911	0.86753	1
GO:0032787	monocarboxylic acid metabolic process	130	6	10.08	2180	0.94464	1
GO:0032868	response to insulin	41	2	3.18	1821	0.83831	1
GO:0032869	cellular response to insulin stimulus	39	2	3.02	1779	0.81706	1
GO:0032870	cellular response to hormone stimulus	84	4	6.51	2018	0.89988	1
GO:0032872	regulation of stress-activated MAPK cascade	53	3	4.11	1698	0.7903	1
GO:0032873	negative regulation of stress-activated MAPK cascade	24	1	1.86	1869	0.85635	1
GO:0032874	positive regulation of stress-activated MAPK cascade	23	2	1.78	1111	0.54208	1
GO:0032879	regulation of localization	351	19	27.22	2281	0.96798	1
GO:0032881	regulation of polysaccharide metabolic process	5	1	0.39	664	0.33215	1
GO:0032886	regulation of microtubule-based process	44	8	3.41	158	0.01829	1
GO:0032940	secretion by cell	175	6	13.57	2446	0.99459	1
GO:0032984	protein-containing complex disassembly	66	3	5.12	1992	0.89563	1
GO:0032989	cellular component morphogenesis	570	37	44.2	2015	0.89776	1
GO:0032990	cell part morphogenesis	374	17	29	2464	0.99593	1
GO:0033036	macromolecule localization	725	37	56.22	2503	0.99878	1
GO:0033043	regulation of organelle organization	355	39	27.53	155	0.01595	1
GO:0033044	regulation of chromosome organization	133	16	10.31	244	0.05136	1
GO:0033045	regulation of sister chromatid segregation	37	8	2.87	111	0.00642	1
GO:0033046	negative regulation of sister chromatid segregation	18	3	1.4	420	0.15911	1
GO:0033048	negative regulation of mitotic sister chromatid segregation	15	3	1.16	357	0.105	1
GO:0033059	cellular pigmentation	10	1	0.78	1160	0.55411	1
GO:0033157	regulation of intracellular protein transport	25	2	1.94	1210	0.58813	1
GO:0033206	meiotic cytokinesis	34	4	2.64	544	0.26832	1
GO:0033301	cell cycle comprising mitosis without cytokinesis	24	6	1.86	131	0.00852	1
GO:0033365	protein localization to organelle	169	6	13.11	2420	0.99247	1
GO:0033500	carbohydrate homeostasis	35	1	2.71	2169	0.9411	1
GO:0033554	cellular response to stress	492	53	38.15	126	0.008	1
GO:0033692	cellular polysaccharide biosynthetic process	16	1	1.24	1537	0.72551	1
GO:0034219	carbohydrate transmembrane transport	18	4	1.4	216	0.04572	1
GO:0034220	ion transmembrane transport	213	16	16.52	1255	0.59162	1
GO:0034248	regulation of cellular amide metabolic process	181	9	14.04	2198	0.94816	1
GO:0034249	negative regulation of cellular amide metabolic process	78	6	6.05	1184	0.56972	1
GO:0034250	positive regulation of cellular amide metabolic process	53	1	4.11	2379	0.98635	1
GO:0034329	cell junction assembly	56	2	4.34	2161	0.93854	1
GO:0034330	cell junction organization	76	3	5.89	2171	0.94126	1
GO:0034401	chromatin organization involved in regulation of transcription	22	3	1.71	515	0.24084	1
GO:0034404	nucleobase-containing small molecule biosynthetic process	52	2	4.03	2101	0.91997	1
GO:0034440	lipid oxidation	36	1	2.79	2183	0.94569	1
GO:0034470	ncRNA processing	226	5	17.53	2549	0.99993	1
GO:0034605	cellular response to heat	27	1	2.09	1974	0.88734	1
GO:0034613	cellular protein localization	440	16	34.12	2548	0.99991	1
GO:0034622	cellular protein-containing complex assembly	379	21	29.39	2267	0.96525	1
GO:0034641	cellular nitrogen compound metabolic process	2354	183	182.54	1011	0.49965	1
GO:0034645	cellular macromolecule biosynthetic process	1546	125	119.88	577	0.30822	1
GO:0034654	nucleobase-containing compound biosynthetic process	1091	100	84.6	197	0.03571	1
GO:0034655	nucleobase-containing compound catabolic process	141	11	10.93	1107	0.53778	1
GO:0034656	nucleobase-containing small molecule catabolic process	11	1	0.85	1242	0.58873	1
GO:0034660	ncRNA metabolic process	295	12	22.88	2475	0.99688	1
GO:0034661	ncRNA catabolic process	15	1	1.16	1489	0.70239	1
GO:0034724	DNA replication-independent nucleosome organization	7	2	0.54	336	0.09713	1
GO:0034728	nucleosome organization	48	9	3.72	137	0.01037	1
GO:0034754	cellular hormone metabolic process	34	1	2.64	2149	0.93613	1
GO:0034762	regulation of transmembrane transport	18	1	1.4	1647	0.76652	1
GO:0034764	positive regulation of transmembrane transport	9	1	0.7	1050	0.51658	1
GO:0034765	regulation of ion transmembrane transport	18	1	1.4	1648	0.76652	1
GO:0034767	positive regulation of ion transmembrane transport	9	1	0.7	1051	0.51658	1
GO:0035023	regulation of Rho protein signal transduction	30	3	2.33	829	0.4145	1
GO:0035075	response to ecdysone	40	1	3.1	2243	0.96075	1
GO:0035089	establishment of apical/basal cell polarity	11	1	0.85	1243	0.58873	1
GO:0035107	appendage morphogenesis	262	12	20.32	2377	0.98627	1
GO:0035114	imaginal disc-derived appendage morphogenesis	260	12	20.16	2368	0.98505	1
GO:0035120	post-embryonic appendage morphogenesis	256	12	19.85	2356	0.98232	1
GO:0035150	regulation of tube size	48	2	3.72	2010	0.89621	1
GO:0035151	regulation of tube size, open tracheal system	46	2	3.57	1946	0.88201	1
GO:0035152	regulation of tube architecture, open tracheal system	76	2	5.89	2364	0.98436	1
GO:0035162	embryonic hemopoiesis	21	1	1.63	1768	0.81685	1
GO:0035166	post-embryonic hemopoiesis	36	1	2.79	2184	0.94569	1
GO:0035167	larval lymph gland hemopoiesis	36	1	2.79	2185	0.94569	1
GO:0035168	larval lymph gland hemocyte differentiation	13	1	1.01	1382	0.65014	1
GO:0035171	lamellocyte differentiation	12	1	0.93	1301	0.62067	1
GO:0035172	hemocyte proliferation	43	1	3.33	2289	0.96923	1
GO:0035194	posttranscriptional gene silencing by RNA	51	3	3.95	1665	0.76795	1
GO:0035195	gene silencing by miRNA	30	1	2.33	2058	0.91166	1
GO:0035203	regulation of lamellocyte differentiation	8	1	0.62	969	0.47589	1
GO:0035210	prepupal development	17	1	1.32	1585	0.74684	1
GO:0035218	leg disc development	79	1	6.13	2497	0.99836	1
GO:0035220	wing disc development	306	16	23.73	2292	0.96953	1
GO:0035239	tube morphogenesis	396	21	30.71	2341	0.98015	1
GO:0035264	multicellular organism growth	43	5	3.33	511	0.23815	1
GO:0035272	exocrine system development	109	5	8.45	2137	0.93283	1
GO:0035282	segmentation	198	9	15.35	2321	0.97499	1
GO:0035295	tube development	568	29	44.05	2467	0.99618	1
GO:0035315	hair cell differentiation	40	5	3.1	463	0.19513	1
GO:0035316	non-sensory hair organization	40	5	3.1	464	0.19513	1
GO:0035337	fatty-acyl-CoA metabolic process	16	1	1.24	1538	0.72551	1
GO:0035383	thioester metabolic process	34	1	2.64	2150	0.93613	1
GO:0035601	protein deacylation	16	1	1.24	1539	0.72551	1
GO:0035825	homologous recombination	28	8	2.17	63	0.00096	1
GO:0035966	response to topologically incorrect protein	35	3	2.71	1072	0.51725	1
GO:0035967	cellular response to topologically incorrect protein	33	3	2.56	985	0.47722	1
GO:0036211	protein modification process	1011	68	78.4	2084	0.91827	1
GO:0036213	contractile ring contraction	8	1	0.62	970	0.47589	1
GO:0036270	response to diuretic	9	3	0.7	181	0.02736	1
GO:0036314	response to sterol	40	1	3.1	2244	0.96075	1
GO:0036315	cellular response to sterol	17	1	1.32	1586	0.74684	1
GO:0036445	neuronal stem cell division	39	1	3.02	2225	0.95743	1
GO:0038127	ERBB signaling pathway	63	1	4.89	2435	0.99395	1
GO:0038202	TORC1 signaling	36	1	2.79	2186	0.94569	1
GO:0040001	establishment of mitotic spindle localization	24	1	1.86	1870	0.85635	1
GO:0040008	regulation of growth	261	15	20.24	2078	0.91683	1
GO:0040012	regulation of locomotion	52	4	4.03	1197	0.58161	1
GO:0040014	regulation of multicellular organism growth	41	5	3.18	486	0.20917	1
GO:0040017	positive regulation of locomotion	16	1	1.24	1540	0.72551	1
GO:0040020	regulation of meiotic nuclear division	10	2	0.78	445	0.17878	1
GO:0040029	regulation of gene expression, epigenetic	157	14	12.17	671	0.33222	1
GO:0042051	compound eye photoreceptor development	81	3	6.28	2219	0.95638	1
GO:0042060	wound healing	77	2	5.97	2370	0.98542	1
GO:0042063	gliogenesis	72	2	5.58	2338	0.97932	1
GO:0042073	intraciliary transport	7	1	0.54	881	0.43179	1
GO:0042157	lipoprotein metabolic process	57	3	4.42	1799	0.82965	1
GO:0042158	lipoprotein biosynthetic process	54	3	4.19	1713	0.80079	1
GO:0042176	regulation of protein catabolic process	55	4	4.26	1326	0.62667	1
GO:0042178	xenobiotic catabolic process	5	1	0.39	665	0.33215	1
GO:0042180	cellular ketone metabolic process	50	1	3.88	2357	0.98258	1
GO:0042254	ribosome biogenesis	197	1	15.28	2568	1	1
GO:0042303	molting cycle	81	7	6.28	904	0.44071	1
GO:0042325	regulation of phosphorylation	231	13	17.91	2080	0.91732	1
GO:0042326	negative regulation of phosphorylation	64	1	4.96	2444	0.99442	1
GO:0042327	positive regulation of phosphorylation	137	10	10.62	1327	0.62668	1
GO:0042330	taxis	277	12	21.48	2424	0.99287	1
GO:0042335	cuticle development	136	17	10.55	193	0.0333	1
GO:0042337	cuticle development involved in chitin-based cuticle molting cycle	23	2	1.78	1112	0.54208	1
GO:0042386	hemocyte differentiation	36	3	2.79	1104	0.53663	1
GO:0042387	plasmatocyte differentiation	13	1	1.01	1383	0.65014	1
GO:0042441	eye pigment metabolic process	35	3	2.71	1073	0.51725	1
GO:0042445	hormone metabolic process	49	2	3.8	2023	0.9027	1
GO:0042451	purine nucleoside biosynthetic process	11	1	0.85	1244	0.58873	1
GO:0042454	ribonucleoside catabolic process	9	1	0.7	1052	0.51658	1
GO:0042455	ribonucleoside biosynthetic process	18	1	1.4	1649	0.76652	1
GO:0042461	photoreceptor cell development	100	4	7.75	2221	0.95715	1
GO:0042462	eye photoreceptor cell development	84	3	6.51	2260	0.96361	1
GO:0042478	regulation of eye photoreceptor cell development	10	1	0.78	1161	0.55411	1
GO:0042493	response to drug	140	10	10.86	1407	0.65407	1
GO:0042551	neuron maturation	49	1	3.8	2348	0.9811	1
GO:0042592	homeostatic process	385	25	29.85	1854	0.8536	1
GO:0042593	glucose homeostasis	30	1	2.33	2059	0.91166	1
GO:0042659	regulation of cell fate specification	25	3	1.94	575	0.30581	1
GO:0042676	compound eye cone cell fate commitment	10	2	0.78	446	0.17878	1
GO:0042679	compound eye cone cell fate specification	5	2	0.39	241	0.05128	1
GO:0042692	muscle cell differentiation	104	10	8.06	554	0.2856	1
GO:0042706	eye photoreceptor cell fate commitment	46	2	3.57	1947	0.88201	1
GO:0042745	circadian sleep/wake cycle	34	2	2.64	1604	0.75266	1
GO:0042886	amide transport	389	12	30.16	2555	0.99998	1
GO:0043039	tRNA aminoacylation	40	2	3.1	1796	0.82798	1
GO:0043044	ATP-dependent chromatin remodeling	32	4	2.48	496	0.23349	1
GO:0043062	extracellular structure organization	57	1	4.42	2403	0.99014	1
GO:0043063	intercellular bridge organization	12	1	0.93	1302	0.62067	1
GO:0043067	regulation of programmed cell death	204	14	15.82	1520	0.7235	1
GO:0043068	positive regulation of programmed cell death	66	5	5.12	1214	0.58856	1
GO:0043086	negative regulation of catalytic activity	68	4	5.27	1677	0.78397	1
GO:0043094	cellular metabolic compound salvage	20	1	1.55	1726	0.80141	1
GO:0043101	purine-containing compound salvage	8	1	0.62	971	0.47589	1
GO:0043149	stress fiber assembly	7	1	0.54	882	0.43179	1
GO:0043170	macromolecule metabolic process	3290	247	255.12	1670	0.77573	1
GO:0043207	response to external biotic stimulus	269	14	20.86	2257	0.9626	1
GO:0043242	negative regulation of protein complex disassembly	14	1	1.09	1447	0.67732	1
GO:0043244	regulation of protein complex disassembly	25	2	1.94	1211	0.58813	1
GO:0043254	regulation of protein complex assembly	95	1	7.37	2533	0.99956	1
GO:0043269	regulation of ion transport	40	2	3.1	1797	0.82798	1
GO:0043270	positive regulation of ion transport	13	1	1.01	1384	0.65014	1
GO:0043279	response to alkaloid	19	3	1.47	431	0.17872	1
GO:0043281	regulation of cysteine-type endopeptidase activity involved in apoptotic process	23	4	1.78	348	0.09775	1
GO:0043297	apical junction assembly	45	1	3.49	2318	0.97384	1
GO:0043324	pigment metabolic process involved in developmental pigmentation	35	3	2.71	1074	0.51725	1
GO:0043331	response to dsRNA	21	1	1.63	1769	0.81685	1
GO:0043405	regulation of MAP kinase activity	28	1	2.17	2003	0.89611	1
GO:0043406	positive regulation of MAP kinase activity	19	1	1.47	1688	0.78467	1
GO:0043408	regulation of MAPK cascade	132	8	10.24	1753	0.8136	1
GO:0043409	negative regulation of MAPK cascade	31	1	2.4	2095	0.91854	1
GO:0043412	macromolecule modification	1100	74	85.3	2118	0.92753	1
GO:0043413	macromolecule glycosylation	80	3	6.2	2208	0.95368	1
GO:0043414	macromolecule methylation	108	6	8.37	1852	0.85333	1
GO:0043434	response to peptide hormone	43	3	3.33	1415	0.65888	1
GO:0043473	pigmentation	98	8	7.6	1003	0.49392	1
GO:0043474	pigment metabolic process involved in pigmentation	35	3	2.71	1075	0.51725	1
GO:0043487	regulation of RNA stability	13	1	1.01	1385	0.65014	1
GO:0043543	protein acylation	96	7	7.44	1314	0.62359	1
GO:0043549	regulation of kinase activity	102	7	7.91	1459	0.68678	1
GO:0043603	cellular amide metabolic process	541	15	41.95	2567	1	1
GO:0043604	amide biosynthetic process	449	13	34.82	2564	1	1
GO:0043624	cellular protein complex disassembly	36	2	2.79	1675	0.78048	1
GO:0043628	ncRNA 3'-end processing	29	2	2.25	1431	0.66967	1
GO:0043631	RNA polyadenylation	27	1	2.09	1975	0.88734	1
GO:0043632	modification-dependent macromolecule catabolic process	212	16	16.44	1203	0.58382	1
GO:0043633	polyadenylation-dependent RNA catabolic process	6	1	0.47	779	0.38398	1
GO:0043634	polyadenylation-dependent ncRNA catabolic process	6	1	0.47	780	0.38398	1
GO:0043648	dicarboxylic acid metabolic process	26	1	2.02	1935	0.87783	1
GO:0043687	post-translational protein modification	12	1	0.93	1303	0.62067	1
GO:0043933	protein-containing complex subunit organization	524	31	40.63	2249	0.96115	1
GO:0044042	glucan metabolic process	24	1	1.86	1871	0.85635	1
GO:0044057	regulation of system process	47	4	3.64	1014	0.50011	1
GO:0044085	cellular component biogenesis	1107	68	85.84	2399	0.98904	1
GO:0044089	positive regulation of cellular component biogenesis	118	6	9.15	2038	0.90426	1
GO:0044092	negative regulation of molecular function	88	5	6.82	1788	0.82308	1
GO:0044093	positive regulation of molecular function	199	18	15.43	549	0.28078	1
GO:0044106	cellular amine metabolic process	21	2	1.63	1000	0.49258	1
GO:0044237	cellular metabolic process	3879	280	300.8	2283	0.96901	1
GO:0044238	primary metabolic process	3857	284	299.09	2064	0.91409	1
GO:0044242	cellular lipid catabolic process	73	3	5.66	2127	0.93	1
GO:0044255	cellular lipid metabolic process	302	16	23.42	2265	0.96489	1
GO:0044257	cellular protein catabolic process	233	16	18.07	1552	0.73219	1
GO:0044260	cellular macromolecule metabolic process	2602	219	201.77	266	0.06376	1
GO:0044262	cellular carbohydrate metabolic process	84	4	6.51	2019	0.89988	1
GO:0044264	cellular polysaccharide metabolic process	35	2	2.71	1663	0.76693	1
GO:0044265	cellular macromolecule catabolic process	334	25	25.9	1265	0.60577	1
GO:0044267	cellular protein metabolic process	1596	95	123.76	2521	0.99927	1
GO:0044270	cellular nitrogen compound catabolic process	153	11	11.86	1348	0.64862	1
GO:0044271	cellular nitrogen compound biosynthetic process	1531	113	118.72	1571	0.7466	1
GO:0044272	sulfur compound biosynthetic process	33	1	2.56	2134	0.93073	1
GO:0044281	small molecule metabolic process	667	44	51.72	2005	0.89615	1
GO:0044282	small molecule catabolic process	119	9	9.23	1200	0.58162	1
GO:0044283	small molecule biosynthetic process	194	10	15.04	2172	0.94148	1
GO:0044550	secondary metabolite biosynthetic process	26	1	2.02	1936	0.87783	1
GO:0044703	multi-organism reproductive process	829	65	64.28	990	0.48217	1
GO:0044772	mitotic cell cycle phase transition	103	21	7.99	36	3.2e-05	1
GO:0044773	mitotic DNA damage checkpoint	19	6	1.47	82	0.00239	1
GO:0044774	mitotic DNA integrity checkpoint	23	7	1.78	74	0.00133	1
GO:0044782	cilium organization	45	7	3.49	251	0.05619	1
GO:0044784	metaphase/anaphase transition of cell cycle	31	7	2.4	128	0.00828	1
GO:0044786	cell cycle DNA replication	34	10	2.64	43	0.00017	1
GO:0044818	mitotic G2/M transition checkpoint	15	4	1.16	174	0.02452	1
GO:0044837	actomyosin contractile ring organization	27	4	2.09	408	0.15268	1
GO:0044839	cell cycle G2/M phase transition	37	8	2.87	112	0.00642	1
GO:0044843	cell cycle G1/S phase transition	36	8	2.79	109	0.00539	1
GO:0045017	glycerolipid biosynthetic process	58	5	4.5	927	0.47157	1
GO:0045055	regulated exocytosis	50	2	3.88	2047	0.90881	1
GO:0045088	regulation of innate immune response	81	4	6.28	1959	0.88357	1
GO:0045137	development of primary sexual characteristics	44	2	3.41	1897	0.86603	1
GO:0045144	meiotic sister chromatid segregation	5	1	0.39	666	0.33215	1
GO:0045168	cell-cell signaling involved in cell fate commitment	32	2	2.48	1516	0.72187	1
GO:0045184	establishment of protein localization	395	14	30.63	2542	0.99987	1
GO:0045185	maintenance of protein location	34	3	2.64	1009	0.49743	1
GO:0045197	establishment or maintenance of epithelial cell apical/basal polarity	27	1	2.09	1976	0.88734	1
GO:0045216	cell-cell junction organization	75	3	5.82	2157	0.93771	1
GO:0045446	endothelial cell differentiation	9	1	0.7	1053	0.51658	1
GO:0045466	R7 cell differentiation	50	2	3.88	2048	0.90881	1
GO:0045596	negative regulation of cell differentiation	95	6	7.37	1616	0.75631	1
GO:0045597	positive regulation of cell differentiation	86	6	6.67	1424	0.66582	1
GO:0045610	regulation of hemocyte differentiation	23	1	1.78	1838	0.84423	1
GO:0045611	negative regulation of hemocyte differentiation	10	1	0.78	1162	0.55411	1
GO:0045613	regulation of plasmatocyte differentiation	8	1	0.62	972	0.47589	1
GO:0045614	negative regulation of plasmatocyte differentiation	8	1	0.62	973	0.47589	1
GO:0045664	regulation of neuron differentiation	122	5	9.46	2268	0.96527	1
GO:0045666	positive regulation of neuron differentiation	48	4	3.72	1066	0.51699	1
GO:0045676	regulation of R7 cell differentiation	12	2	0.93	508	0.2374	1
GO:0045704	regulation of salivary gland boundary specification	8	1	0.62	974	0.47589	1
GO:0045740	positive regulation of DNA replication	9	1	0.7	1054	0.51658	1
GO:0045786	negative regulation of cell cycle	94	22	7.29	28	1.9e-06	1
GO:0045787	positive regulation of cell cycle	60	14	4.65	41	0.00015	1
GO:0045799	positive regulation of chromatin assembly or disassembly	8	1	0.62	975	0.47589	1
GO:0045814	negative regulation of gene expression, epigenetic	99	12	7.68	300	0.08012	1
GO:0045815	positive regulation of gene expression, epigenetic	17	2	1.32	793	0.3842	1
GO:0045839	negative regulation of mitotic nuclear division	16	3	1.24	368	0.12214	1
GO:0045840	positive regulation of mitotic nuclear division	14	2	1.09	565	0.29682	1
GO:0045841	negative regulation of mitotic metaphase/anaphase transition	15	3	1.16	358	0.105	1
GO:0045859	regulation of protein kinase activity	84	5	6.51	1704	0.79068	1
GO:0045860	positive regulation of protein kinase activity	54	4	4.19	1273	0.612	1
GO:0045861	negative regulation of proteolysis	32	1	2.48	2112	0.92488	1
GO:0045934	negative regulation of nucleobase-containing compound metabolic process	311	31	24.12	305	0.08664	1
GO:0045935	positive regulation of nucleobase-containing compound metabolic process	342	29	26.52	672	0.33294	1
GO:0045936	negative regulation of phosphate metabolic process	74	1	5.74	2480	0.99753	1
GO:0045937	positive regulation of phosphate metabolic process	146	11	11.32	1206	0.5856	1
GO:0045981	positive regulation of nucleotide metabolic process	5	1	0.39	667	0.33215	1
GO:0046011	regulation of oskar mRNA translation	14	1	1.09	1448	0.67732	1
GO:0046034	ATP metabolic process	105	1	8.14	2539	0.9998	1
GO:0046068	cGMP metabolic process	17	2	1.32	794	0.3842	1
GO:0046112	nucleobase biosynthetic process	16	2	1.24	694	0.3555	1
GO:0046128	purine ribonucleoside metabolic process	22	1	1.71	1813	0.8311	1
GO:0046148	pigment biosynthetic process	65	6	5.04	803	0.3913	1
GO:0046154	rhodopsin metabolic process	16	3	1.24	369	0.12214	1
GO:0046164	alcohol catabolic process	13	1	1.01	1386	0.65014	1
GO:0046189	phenol-containing compound biosynthetic process	13	2	1.01	538	0.26712	1
[truncated: 1,861 more rows]

## Sheet: GO_FP_up
GO.ID	Term	Annotated	Significant	Expected	Rank in Fisher.classic	Fisher.classic	Fisher.weight01
GO:0002181	cytoplasmic translation	103	30	8.37	1	2.8e-10	6.6e-11
GO:0006508	proteolysis	573	66	46.55	80	0.00193	4e-08
GO:0008406	gonad development	44	16	3.57	3	1.4e-07	3.4e-06
GO:0007305	vitelline membrane formation involved in chorion-containing eggshell formation	11	7	0.89	10	5.6e-06	5.6e-06
GO:0042761	very long-chain fatty acid biosynthetic process	16	8	1.3	13	1.3e-05	1.3e-05
GO:0007494	midgut development	27	9	2.19	26	0.00018	0.00018
GO:0019367	fatty acid elongation, saturated fatty acid	13	6	1.06	33	0.00029	0.00029
GO:0034625	fatty acid elongation, monounsaturated fatty acid	13	6	1.06	34	0.00029	0.00029
GO:0034626	fatty acid elongation, polyunsaturated fatty acid	13	6	1.06	35	0.00029	0.00029
GO:0000028	ribosomal small subunit assembly	14	6	1.14	44	0.00048	0.00048
GO:0072175	epithelial tube formation	6	4	0.49	50	0.00057	0.00057
GO:0007426	tracheal outgrowth, open tracheal system	21	7	1.71	59	0.00095	0.00095
GO:0016339	calcium-dependent cell-cell adhesion via plasma membrane cell adhesion molecules	16	6	1.3	66	0.00111	0.00111
GO:0007419	ventral cord development	62	13	5.04	68	0.00119	0.00119
GO:0007503	fat body development	7	4	0.57	70	0.00124	0.00124
GO:0016318	ommatidial rotation	22	7	1.79	74	0.0013	0.0013
GO:0044331	cell-cell adhesion mediated by cadherin	12	5	0.97	77	0.0017	0.0017
GO:0007155	cell adhesion	158	32	12.84	8	9.5e-07	0.00182
GO:0050918	positive chemotaxis	8	4	0.65	85	0.00232	0.00232
GO:0030148	sphingolipid biosynthetic process	33	8	2.68	106	0.00405	0.00296
GO:0007400	neuroblast fate determination	14	5	1.14	99	0.00375	0.00375
GO:0014019	neuroblast development	14	5	1.14	100	0.00375	0.00375
GO:0002052	positive regulation of neuroblast proliferation	9	4	0.73	101	0.0039	0.0039
GO:0007398	ectoderm development	25	7	2.03	92	0.00297	0.00402
GO:0006032	chitin catabolic process	20	6	1.62	104	0.00404	0.00404
GO:0055065	metal ion homeostasis	92	11	7.47	505	0.12497	0.00469
GO:0032469	endoplasmic reticulum calcium ion homeostasis	5	3	0.41	109	0.00471	0.00471
GO:0072499	photoreceptor cell axon guidance	27	7	2.19	110	0.00475	0.00475
GO:0021782	glial cell development	30	6	2.44	261	0.031	0.00526
GO:0035050	embryonic heart tube development	21	6	1.71	120	0.00528	0.00528
GO:0022409	positive regulation of cell-cell adhesion	10	4	0.81	129	0.00609	0.00609
GO:1901072	glucosamine-containing compound catabolic process	22	8	1.79	28	0.00021	0.00649
GO:0040036	regulation of fibroblast growth factor receptor signaling pathway	7	4	0.57	71	0.00124	0.00655
GO:0042273	ribosomal large subunit biogenesis	58	13	4.71	52	0.00061	0.00691
GO:0018990	ecdysis, chitin-based cuticle	16	5	1.3	135	0.00714	0.00714
GO:0007156	homophilic cell adhesion via plasma membrane adhesion molecules	29	7	2.36	139	0.00725	0.00725
GO:0085029	extracellular matrix assembly	17	10	1.38	2	1.3e-07	0.0086
GO:0007455	eye-antennal disc morphogenesis	30	7	2.44	149	0.00881	0.00881
GO:0001746	Bolwig's organ morphogenesis	6	3	0.49	150	0.00886	0.00886
GO:0007473	wing disc proximal/distal pattern formation	6	3	0.49	151	0.00886	0.00886
GO:0010888	negative regulation of lipid storage	6	3	0.49	152	0.00886	0.00886
GO:0034446	substrate adhesion-dependent cell spreading	6	3	0.49	153	0.00886	0.00886
GO:0048562	embryonic organ morphogenesis	6	3	0.49	154	0.00886	0.00886
GO:0006697	ecdysone biosynthetic process	11	4	0.89	157	0.00896	0.00896
GO:2000274	regulation of epithelial cell migration, open tracheal system	11	4	0.89	158	0.00896	0.00896
GO:0003007	heart morphogenesis	33	7	2.68	186	0.01495	0.00941
GO:0007420	brain development	94	12	7.64	382	0.07733	0.01061
GO:0046716	muscle cell cellular homeostasis	24	6	1.95	165	0.01063	0.01063
GO:0048085	adult chitin-containing cuticle pigmentation	28	6	2.27	226	0.02256	0.01222
GO:0008585	female gonad development	12	4	0.97	170	0.01259	0.01259
GO:0016348	imaginal disc-derived leg joint morphogenesis	12	4	0.97	171	0.01259	0.01259
GO:0010038	response to metal ion	33	5	2.68	506	0.12536	0.01264
GO:0005975	carbohydrate metabolic process	211	27	17.14	166	0.01173	0.01318
GO:0007474	imaginal disc-derived wing vein specification	40	8	3.25	177	0.01359	0.01359
GO:0007435	salivary gland morphogenesis	81	10	6.58	501	0.11926	0.01376
GO:0035152	regulation of tube architecture, open tracheal system	76	14	6.17	91	0.00287	0.0142
GO:0048103	somatic stem cell division	46	7	3.74	380	0.0758	0.01451
GO:0003401	axis elongation	7	3	0.57	181	0.01457	0.01457
GO:0006044	N-acetylglucosamine metabolic process	7	3	0.57	182	0.01457	0.01457
GO:0007386	compartment pattern specification	7	3	0.57	183	0.01457	0.01457
GO:0008584	male gonad development	7	3	0.57	184	0.01457	0.01457
GO:0016477	cell migration	266	33	21.61	160	0.00902	0.01692
GO:0008258	head involution	34	7	2.76	191	0.01755	0.01755
GO:0040003	chitin-based cuticle development	82	12	6.66	265	0.03216	0.01795
GO:0035161	imaginal disc lineage restriction	8	3	0.65	214	0.02192	0.01867
GO:0048665	neuron fate specification	12	3	0.97	364	0.06755	0.01869
GO:0008015	blood circulation	28	4	2.27	598	0.18876	0.01871
GO:0051960	regulation of nervous system development	262	22	21.29	1199	0.46844	0.01877
GO:0045216	cell-cell junction organization	75	6	6.09	1471	0.57741	0.01882
GO:0000027	ribosomal large subunit assembly	20	5	1.62	198	0.01934	0.01934
GO:0007362	terminal region determination	20	5	1.62	199	0.01934	0.01934
GO:0006525	arginine metabolic process	8	3	0.65	215	0.02192	0.02192
GO:0007440	foregut morphogenesis	8	3	0.65	216	0.02192	0.02192
GO:0007458	progression of morphogenetic furrow involved in compound eye morphogenesis	8	3	0.65	217	0.02192	0.02192
GO:0008343	adult feeding behavior	8	3	0.65	218	0.02192	0.02192
GO:0060026	convergent extension	8	3	0.65	219	0.02192	0.02192
GO:0090276	regulation of peptide hormone secretion	8	3	0.65	220	0.02192	0.02192
GO:0007369	gastrulation	64	7	5.2	716	0.2616	0.02198
GO:0030713	ovarian follicle cell stalk formation	14	4	1.14	224	0.02236	0.02236
GO:0035220	wing disc development	306	30	24.86	570	0.16029	0.02338
GO:0007160	cell-matrix adhesion	15	4	1.22	245	0.02858	0.02858
GO:0071711	basement membrane organization	15	4	1.22	246	0.02858	0.02858
GO:0070983	dendrite guidance	22	5	1.79	250	0.02872	0.02872
GO:0009952	anterior/posterior pattern specification	148	21	12.02	145	0.00815	0.03
GO:0008595	anterior/posterior axis specification, embryo	114	16	9.26	207	0.02136	0.03031
GO:0055114	oxidation-reduction process	433	39	35.18	725	0.26878	0.03056
GO:0001894	tissue homeostasis	44	8	3.57	231	0.02355	0.03063
GO:0007443	Malpighian tubule morphogenesis	37	8	3.01	147	0.00846	0.03068
GO:0006465	signal peptide processing	9	3	0.73	255	0.03093	0.03093
GO:0035225	determination of genital disc primordium	9	3	0.73	256	0.03093	0.03093
GO:0071322	cellular response to carbohydrate stimulus	9	3	0.73	257	0.03093	0.03093
GO:0007417	central nervous system development	204	29	16.57	82	0.00202	0.03136
GO:0035215	genital disc development	38	9	3.09	90	0.00278	0.03492
GO:0014017	neuroblast fate commitment	18	7	1.46	38	0.00032	0.03497
GO:0008045	motor neuron axon guidance	56	9	4.55	271	0.03515	0.03515
GO:0007224	smoothened signaling pathway	50	5	4.06	943	0.38371	0.03607
GO:0008293	torso signaling pathway	24	5	1.95	276	0.04056	0.04056
GO:0007431	salivary gland development	109	15	8.86	252	0.02967	0.04086
GO:0030381	chorion-containing eggshell pattern formation	10	3	0.81	281	0.04158	0.04158
GO:0031290	retinal ganglion cell axon guidance	10	3	0.81	282	0.04158	0.04158
GO:0035160	maintenance of epithelial integrity, open tracheal system	10	3	0.81	283	0.04158	0.04158
GO:0070593	dendrite self-avoidance	10	3	0.81	284	0.04158	0.04158
GO:0003015	heart process	35	5	2.84	553	0.15068	0.04158
GO:0006952	defense response	298	22	24.21	1777	0.71508	0.0424
GO:0007411	axon guidance	211	31	17.14	57	0.00083	0.04246
GO:0042051	compound eye photoreceptor development	81	10	6.58	502	0.11926	0.04362
GO:0030488	tRNA methylation	18	4	1.46	315	0.05283	0.05283
GO:0035277	spiracle morphogenesis, open tracheal system	18	4	1.46	316	0.05283	0.05283
GO:0030301	cholesterol transport	17	4	1.38	291	0.04381	0.05369
GO:0042335	cuticle development	136	21	11.05	94	0.00301	0.0544
GO:0008039	synaptic target recognition	36	7	2.92	232	0.02367	0.05458
GO:0007460	R8 cell fate commitment	10	3	0.81	285	0.04158	0.05576
GO:0042676	compound eye cone cell fate commitment	10	3	0.81	286	0.04158	0.05576
GO:0000467	exonucleolytic trimming to generate mature 3'-end of 5.8S rRNA from tricistronic rRNA transcript (SS...	5	2	0.41	324	0.05586	0.05586
GO:0006265	DNA topological change	5	2	0.41	325	0.05586	0.05586
GO:0006551	leucine metabolic process	5	2	0.41	326	0.05586	0.05586
GO:0007313	maternal specification of dorsal/ventral axis, oocyte, soma encoded	5	2	0.41	327	0.05586	0.05586
GO:0007561	imaginal disc eversion	5	2	0.41	328	0.05586	0.05586
GO:0034227	tRNA thio-modification	5	2	0.41	329	0.05586	0.05586
GO:0035001	dorsal trunk growth, open tracheal system	5	2	0.41	330	0.05586	0.05586
GO:0035310	notum cell fate specification	5	2	0.41	331	0.05586	0.05586
GO:0042685	cardioblast cell fate specification	5	2	0.41	332	0.05586	0.05586
GO:0045463	R8 cell development	5	2	0.41	333	0.05586	0.05586
GO:0045743	positive regulation of fibroblast growth factor receptor signaling pathway	5	2	0.41	334	0.05586	0.05586
GO:0046663	dorsal closure, leading edge cell differentiation	5	2	0.41	335	0.05586	0.05586
GO:0048052	R1/R6 cell differentiation	5	2	0.41	336	0.05586	0.05586
GO:0050886	endocrine process	5	2	0.41	337	0.05586	0.05586
GO:0051890	regulation of cardioblast differentiation	5	2	0.41	338	0.05586	0.05586
GO:0060395	SMAD protein signal transduction	5	2	0.41	339	0.05586	0.05586
GO:0071046	nuclear polyadenylation-dependent ncRNA catabolic process	5	2	0.41	340	0.05586	0.05586
GO:0071260	cellular response to mechanical stimulus	5	2	0.41	341	0.05586	0.05586
GO:0090646	mitochondrial tRNA processing	5	2	0.41	342	0.05586	0.05586
GO:0097327	response to antineoplastic agent	5	2	0.41	343	0.05586	0.05586
GO:0007391	dorsal closure	95	14	7.72	206	0.02056	0.05857
GO:0007169	transmembrane receptor protein tyrosine kinase signaling pathway	155	21	12.59	176	0.01353	0.06104
GO:0007605	sensory perception of sound	44	7	3.57	355	0.06229	0.06229
GO:0007413	axonal fasciculation	19	4	1.54	357	0.06278	0.06278
GO:0045167	asymmetric protein localization involved in cell fate determination	19	4	1.54	358	0.06278	0.06278
GO:0006629	lipid metabolic process	386	40	31.36	361	0.06318	0.06499
GO:0002098	tRNA wobble uridine modification	12	3	0.97	365	0.06755	0.06755
GO:0007509	mesoderm migration involved in gastrulation	12	3	0.97	366	0.06755	0.06755
GO:0035567	non-canonical Wnt signaling pathway	12	3	0.97	367	0.06755	0.06755
GO:0007280	pole cell migration	20	4	1.62	374	0.07364	0.07364
GO:0043171	peptide catabolic process	20	4	1.62	375	0.07364	0.07364
GO:0007314	oocyte anterior/posterior axis specification	81	8	6.58	805	0.3359	0.07399
GO:0006644	phospholipid metabolic process	122	7	9.91	2133	0.87692	0.07562
GO:0000122	negative regulation of transcription by RNA polymerase II	134	16	10.89	381	0.07592	0.07592
GO:0035295	tube development	568	71	46.15	23	0.00012	0.07769
GO:0030155	regulation of cell adhesion	40	9	3.25	102	0.00403	0.07835
GO:0042659	regulation of cell fate specification	25	7	2.03	93	0.00297	0.07854
GO:0007365	periodic partitioning	36	7	2.92	233	0.02367	0.07875
GO:0042675	compound eye cone cell differentiation	16	5	1.3	136	0.00714	0.07884
GO:0060562	epithelial tube morphogenesis	368	45	29.9	98	0.00332	0.0792
GO:0042693	muscle cell fate commitment	11	3	0.89	321	0.05381	0.07922
GO:0045047	protein targeting to ER	15	3	1.22	488	0.1168	0.0793
GO:0001764	neuron migration	6	2	0.49	383	0.07936	0.07936
GO:0003407	neural retina development	6	2	0.49	384	0.07936	0.07936
GO:0006047	UDP-N-acetylglucosamine metabolic process	6	2	0.49	385	0.07936	0.07936
GO:0006560	proline metabolic process	6	2	0.49	386	0.07936	0.07936
GO:0007418	ventral midline development	6	2	0.49	387	0.07936	0.07936
GO:0009083	branched-chain amino acid catabolic process	6	2	0.49	388	0.07936	0.07936
GO:0010862	positive regulation of pathway-restricted SMAD protein phosphorylation	6	2	0.49	389	0.07936	0.07936
GO:0016078	tRNA catabolic process	6	2	0.49	390	0.07936	0.07936
GO:0019321	pentose metabolic process	6	2	0.49	391	0.07936	0.07936
GO:0032528	microvillus organization	6	2	0.49	392	0.07936	0.07936
GO:0032875	regulation of DNA endoreduplication	6	2	0.49	393	0.07936	0.07936
GO:0035155	negative regulation of terminal cell fate specification, open tracheal system	6	2	0.49	394	0.07936	0.07936
GO:0035156	fusion cell fate specification	6	2	0.49	395	0.07936	0.07936
GO:0035207	negative regulation of hemocyte proliferation	6	2	0.49	396	0.07936	0.07936
GO:0043392	negative regulation of DNA binding	6	2	0.49	397	0.07936	0.07936
GO:0043470	regulation of carbohydrate catabolic process	6	2	0.49	398	0.07936	0.07936
GO:0043928	exonucleolytic nuclear-transcribed mRNA catabolic process involved in deadenylation-dependent decay	6	2	0.49	399	0.07936	0.07936
GO:0048036	central complex development	6	2	0.49	400	0.07936	0.07936
GO:0009791	post-embryonic development	502	53	40.78	241	0.02674	0.07958
GO:0008038	neuron recognition	85	17	6.91	41	0.0004	0.07997
GO:0009798	axis specification	176	21	14.3	303	0.04727	0.08043
GO:0016331	morphogenesis of embryonic epithelium	108	17	8.77	127	0.00594	0.08059
GO:0008645	hexose transmembrane transport	17	4	1.38	292	0.04381	0.08101
GO:0051156	glucose 6-phosphate metabolic process	8	3	0.65	221	0.02192	0.08105
GO:0016074	snoRNA metabolic process	9	3	0.73	258	0.03093	0.08106
GO:0048056	R3/R4 cell differentiation	15	3	1.22	489	0.1168	0.08113
GO:0007586	digestion	6	2	0.49	401	0.07936	0.08116
GO:0021953	central nervous system neuron differentiation	6	2	0.49	402	0.07936	0.08116
GO:0045168	cell-cell signaling involved in cell fate commitment	32	4	2.6	713	0.2598	0.08118
GO:0046500	S-adenosylmethionine metabolic process	8	2	0.65	517	0.13307	0.08118
GO:0048139	female germ-line cyst encapsulation	11	2	0.89	657	0.22322	0.08122
GO:0061061	muscle structure development	186	16	15.11	1091	0.44379	0.08125
GO:0046154	rhodopsin metabolic process	16	2	1.3	922	0.37765	0.08127
GO:0010721	negative regulation of cell development	67	6	5.44	1191	0.46485	0.08129
GO:0045859	regulation of protein kinase activity	84	7	6.82	1327	0.52986	0.08135
GO:1905037	autophagosome organization	34	2	2.76	1910	0.77601	0.08148
GO:0120035	regulation of plasma membrane bounded cell projection organization	109	8	8.86	1679	0.67014	0.08149
GO:0009141	nucleoside triphosphate metabolic process	115	4	9.34	2505	0.98685	0.08212
GO:0002385	mucosal immune response	13	3	1.06	414	0.0827	0.0827
GO:0006517	protein deglycosylation	13	3	1.06	415	0.0827	0.0827
GO:0009084	glutamine family amino acid biosynthetic process	13	3	1.06	416	0.0827	0.0827
GO:0010025	wax biosynthetic process	13	3	1.06	417	0.0827	0.0827
GO:0045926	negative regulation of growth	93	8	7.56	1204	0.48739	0.0832
GO:0007422	peripheral nervous system development	74	10	6.01	379	0.07496	0.0842
GO:0007367	segment polarity determination	30	5	2.44	436	0.09152	0.09152
GO:0007165	signal transduction	1242	94	100.91	1961	0.7999	0.09189
GO:0007427	epithelial cell migration, open tracheal system	33	8	2.68	107	0.00405	0.09652
GO:0016360	sensory organ precursor cell fate determination	14	3	1.14	443	0.09915	0.09915
GO:0035336	long-chain fatty-acyl-CoA metabolic process	14	3	1.14	444	0.09915	0.09915
GO:0006030	chitin metabolic process	56	12	4.55	75	0.00149	0.09944
GO:0048066	developmental pigmentation	93	15	7.56	143	0.00756	0.10342
GO:0048859	formation of anatomical boundary	42	8	3.41	195	0.01808	0.10431
GO:0043467	regulation of generation of precursor metabolites and energy	12	3	0.97	368	0.06755	0.1051
GO:0060438	trachea development	12	3	0.97	369	0.06755	0.1051
GO:0031167	rRNA methylation	14	3	1.14	445	0.09915	0.10515
GO:0061355	Wnt protein secretion	14	3	1.14	446	0.09915	0.10515
GO:0006098	pentose-phosphate shunt	7	2	0.57	455	0.10528	0.10528
GO:0006207	'de novo' pyrimidine nucleobase biosynthetic process	7	2	0.57	456	0.10528	0.10528
GO:0007402	ganglion mother cell fate determination	7	2	0.57	457	0.10528	0.10528
GO:0016486	peptide hormone processing	7	2	0.57	458	0.10528	0.10528
GO:0034475	U4 snRNA 3'-end processing	7	2	0.57	459	0.10528	0.10528
GO:0035289	posterior head segmentation	7	2	0.57	460	0.10528	0.10528
GO:0046672	positive regulation of compound eye retinal cell programmed cell death	7	2	0.57	461	0.10528	0.10528
GO:0048042	regulation of post-mating oviposition	7	2	0.57	462	0.10528	0.10528
GO:0051180	vitamin transport	7	2	0.57	463	0.10528	0.10528
GO:0060250	germ-line stem-cell niche homeostasis	7	2	0.57	464	0.10528	0.10528
GO:0060571	morphogenesis of an epithelial fold	7	2	0.57	465	0.10528	0.10528
GO:0061331	epithelial cell proliferation involved in Malpighian tubule morphogenesis	7	2	0.57	466	0.10528	0.10528
GO:1903578	regulation of ATP metabolic process	7	2	0.57	467	0.10528	0.10528
GO:1902476	chloride transmembrane transport	23	4	1.87	483	0.11137	0.11137
GO:0001708	cell fate specification	68	17	5.52	15	2.1e-05	0.11247
GO:0016042	lipid catabolic process	96	6	7.8	1979	0.80311	0.11344
GO:0007552	metamorphosis	374	39	30.39	354	0.06111	0.1136
GO:0006727	ommochrome biosynthetic process	15	3	1.22	490	0.1168	0.1168
GO:0007157	heterophilic cell-cell adhesion via plasma membrane cell adhesion molecules	15	3	1.22	491	0.1168	0.1168
GO:0045944	positive regulation of transcription by RNA polymerase II	230	24	18.69	504	0.12082	0.12082
GO:0006633	fatty acid biosynthetic process	34	11	2.76	17	4.7e-05	0.13221
GO:0006376	mRNA splice site selection	8	2	0.65	518	0.13307	0.13307
GO:0007395	dorsal closure, spreading of leading edge cells	8	2	0.65	519	0.13307	0.13307
GO:0007638	mechanosensory behavior	8	2	0.65	520	0.13307	0.13307
GO:0016330	second mitotic wave involved in compound eye morphogenesis	8	2	0.65	521	0.13307	0.13307
GO:0018279	protein N-linked glycosylation via asparagine	8	2	0.65	522	0.13307	0.13307
GO:0034427	nuclear-transcribed mRNA catabolic process, exonucleolytic, 3'-5'	8	2	0.65	523	0.13307	0.13307
GO:0046855	inositol phosphate dephosphorylation	8	2	0.65	524	0.13307	0.13307
GO:0097150	neuronal stem cell population maintenance	8	2	0.65	525	0.13307	0.13307
GO:1900371	regulation of purine nucleotide biosynthetic process	8	2	0.65	526	0.13307	0.13307
GO:0007444	imaginal disc development	457	48	37.13	273	0.03676	0.1345
GO:0035147	branch fusion, open tracheal system	16	3	1.3	536	0.13551	0.13551
GO:0045924	regulation of female receptivity	16	3	1.3	537	0.13551	0.13551
GO:0046323	glucose import	16	3	1.3	538	0.13551	0.13551
GO:0006820	anion transport	170	15	13.81	1041	0.40831	0.13577
GO:0009953	dorsal/ventral pattern formation	129	11	10.48	1201	0.47981	0.13611
GO:0030707	ovarian follicle cell development	282	32	22.91	266	0.03246	0.13934
GO:0046843	dorsal appendage formation	44	6	3.57	552	0.14336	0.14336
GO:0048729	tissue morphogenesis	494	62	40.13	32	0.00029	0.15021
GO:0035239	tube morphogenesis	396	50	32.17	60	0.001	0.15137
GO:0009790	embryo development	445	59	36.15	20	9.2e-05	0.15216
GO:0048736	appendage development	271	30	22.02	308	0.04954	0.15403
GO:0048737	imaginal disc-derived appendage development	267	29	21.69	362	0.06444	0.15421
GO:0030703	eggshell formation	107	16	8.69	169	0.01215	0.15424
GO:0035218	leg disc development	79	13	6.42	163	0.01056	0.15444
GO:0033627	cell adhesion mediated by integrin	17	3	1.38	561	0.15516	0.15516
GO:0007478	leg disc morphogenesis	67	9	5.44	435	0.09091	0.15521
GO:0015918	sterol transport	20	5	1.62	200	0.01934	0.15526
GO:1901292	nucleoside phosphate catabolic process	32	5	2.6	485	0.11351	0.1555
GO:0048332	mesoderm morphogenesis	21	4	1.71	427	0.08538	0.15553
GO:0002793	positive regulation of peptide secretion	13	3	1.06	418	0.0827	0.15562
GO:0023061	signal release	105	10	8.53	892	0.34774	0.15574
GO:0043279	response to alkaloid	19	3	1.54	625	0.19678	0.15574
GO:0070252	actin-mediated cell contraction	19	3	1.54	626	0.19678	0.15574
GO:0031126	snoRNA 3'-end processing	7	2	0.57	468	0.10528	0.15575
GO:0050920	regulation of chemotaxis	20	3	1.62	647	0.21851	0.15576
GO:0031038	myosin II filament organization	8	2	0.65	527	0.13307	0.15577
GO:0022408	negative regulation of cell-cell adhesion	11	2	0.89	658	0.22322	0.15583
GO:0031669	cellular response to nutrient levels	61	6	4.96	920	0.37576	0.15585
GO:0071229	cellular response to acid chemical	12	2	0.97	698	0.25436	0.15585
GO:1990138	neuron projection extension	48	4	3.9	1403	0.55491	0.15608
GO:0002775	antimicrobial peptide production	41	3	3.33	1639	0.65868	0.15619
GO:0002376	immune system process	373	30	30.3	1402	0.55266	0.1562
GO:0044782	cilium organization	45	3	3.66	1792	0.71999	0.15628
GO:0072350	tricarboxylic acid metabolic process	34	2	2.76	1911	0.77601	0.1563
GO:0046395	carboxylic acid catabolic process	86	6	6.99	1764	0.70993	0.15636
GO:0051052	regulation of DNA metabolic process	62	4	5.04	1856	0.75322	0.15637
GO:0023014	signal transduction by protein phosphorylation	151	11	12.27	1720	0.69224	0.15644
GO:0009913	epidermal cell differentiation	42	2	3.41	2109	0.86654	0.15647
GO:0051049	regulation of transport	227	17	18.44	1691	0.67503	0.15649
GO:0007602	phototransduction	51	5	4.14	1017	0.4003	0.15665
GO:0051963	regulation of synapse assembly	98	5	7.96	2221	0.90919	0.15687
GO:0007622	rhythmic behavior	86	4	6.99	2267	0.92731	0.15687
GO:0002682	regulation of immune system process	187	12	15.19	2056	0.84213	0.15694
GO:0019538	protein metabolic process	1877	150	152.49	1545	0.61312	0.15703
GO:0051707	response to other organism	269	18	21.85	2051	0.83912	0.15712
GO:0006403	RNA localization	166	9	13.49	2288	0.93123	0.15727
GO:0045456	ecdysteroid biosynthetic process	20	6	1.62	105	0.00404	0.16088
GO:0009611	response to wounding	104	11	8.45	655	0.22238	0.16168
GO:0035222	wing disc pattern formation	60	7	4.87	643	0.21199	0.16187
GO:0009058	biosynthetic process	2009	156	163.22	1902	0.76965	0.16199
GO:0019731	antibacterial humoral response	27	4	2.19	586	0.17208	0.16201
GO:0006020	inositol metabolic process	9	2	0.73	571	0.16225	0.16225
GO:0006879	cellular iron ion homeostasis	9	2	0.73	572	0.16225	0.16225
GO:0007414	axonal defasciculation	9	2	0.73	573	0.16225	0.16225
GO:0008062	eclosion rhythm	9	2	0.73	574	0.16225	0.16225
GO:0045314	regulation of compound eye photoreceptor development	9	2	0.73	575	0.16225	0.16225
GO:0048100	wing disc anterior/posterior pattern formation	9	2	0.73	576	0.16225	0.16225
GO:0071028	nuclear mRNA surveillance	9	2	0.73	577	0.16225	0.16225
GO:0043408	regulation of MAPK cascade	132	9	10.72	1858	0.75599	0.1636
GO:0016485	protein processing	59	11	4.79	134	0.00713	0.1743
GO:0098609	cell-cell adhesion	89	17	7.23	54	0.00069	0.18802
GO:0045995	regulation of embryonic development	74	8	6.01	695	0.25093	0.19201
GO:0002230	positive regulation of defense response to virus by host	10	2	0.81	605	0.19242	0.19242
GO:0003341	cilium movement	10	2	0.81	606	0.19242	0.19242
GO:0007628	adult walking behavior	10	2	0.81	607	0.19242	0.19242
GO:0009744	response to sucrose	10	2	0.81	608	0.19242	0.19242
GO:0016075	rRNA catabolic process	10	2	0.81	609	0.19242	0.19242
GO:0016201	synaptic target inhibition	10	2	0.81	610	0.19242	0.19242
GO:0040034	regulation of development, heterochronic	10	2	0.81	611	0.19242	0.19242
GO:0045292	mRNA cis splicing, via spliceosome	10	2	0.81	612	0.19242	0.19242
GO:0045752	positive regulation of Toll signaling pathway	10	2	0.81	613	0.19242	0.19242
GO:0060326	cell chemotaxis	10	2	0.81	614	0.19242	0.19242
GO:2001234	negative regulation of apoptotic signaling pathway	10	2	0.81	615	0.19242	0.19242
GO:0050773	regulation of dendrite development	40	4	3.25	1043	0.41092	0.19264
GO:0042981	regulation of apoptotic process	180	16	14.62	949	0.39111	0.19271
GO:0007409	axonogenesis	271	37	22.02	67	0.00111	0.19444
GO:0045467	R7 cell development	19	3	1.54	627	0.19678	0.19678
GO:0016311	dephosphorylation	135	11	10.97	1383	0.54225	0.20731
GO:0048513	animal organ development	968	106	78.64	48	0.00053	0.21381
GO:0007432	salivary gland boundary specification	20	3	1.62	648	0.21851	0.21851
GO:0035149	lumen formation, open tracheal system	20	3	1.62	649	0.21851	0.21851
GO:0009880	embryonic pattern specification	185	24	15.03	180	0.01445	0.21863
GO:0001709	cell fate determination	120	16	9.75	267	0.03281	0.21932
GO:0048598	embryonic morphogenesis	192	28	15.6	76	0.00163	0.22034
GO:0048546	digestive tract morphogenesis	54	12	4.39	64	0.00106	0.2221
GO:0009996	negative regulation of cell fate specification	17	4	1.38	293	0.04381	0.22236
GO:0030718	germ-line stem cell population maintenance	65	8	5.28	556	0.15476	0.2225
GO:0051270	regulation of cellular component movement	51	10	4.14	133	0.00704	0.22271
GO:0048619	embryonic hindgut morphogenesis	40	9	3.25	103	0.00403	0.22275
GO:0035017	cuticle pattern formation	29	4	2.36	634	0.20594	0.22292
GO:0060070	canonical Wnt signaling pathway	66	7	5.36	750	0.28755	0.22292
GO:0048568	embryonic organ development	46	9	3.74	162	0.0105	0.22292
GO:0002027	regulation of heart rate	11	2	0.89	659	0.22322	0.22322
GO:0007295	growth of a germarium-derived egg chamber	11	2	0.89	660	0.22322	0.22322
GO:0007479	leg disc proximal/distal pattern formation	11	2	0.89	661	0.22322	0.22322
GO:0007482	haltere development	11	2	0.89	662	0.22322	0.22322
GO:0019432	triglyceride biosynthetic process	11	2	0.89	663	0.22322	0.22322
GO:0043052	thermotaxis	11	2	0.89	664	0.22322	0.22322
GO:0040014	regulation of multicellular organism growth	41	4	3.33	1057	0.4297	0.22348
GO:0060446	branching involved in open tracheal system development	47	7	3.82	424	0.08316	0.22365
GO:0000154	rRNA modification	24	5	1.95	277	0.04056	0.2237
GO:0043067	regulation of programmed cell death	204	19	16.57	762	0.29938	0.2239
GO:0035223	leg disc pattern formation	14	3	1.14	447	0.09915	0.22411
GO:0018991	oviposition	15	3	1.22	492	0.1168	0.22414
GO:0007568	aging	140	13	11.37	894	0.34893	0.22419
GO:0046349	amino sugar biosynthetic process	8	2	0.65	528	0.13307	0.22429
GO:0042044	fluid transport	21	3	1.71	681	0.2407	0.22431
GO:0045596	negative regulation of cell differentiation	95	9	7.72	908	0.36605	0.22431
GO:0048278	vesicle docking	28	2	2.27	1693	0.67645	0.22485
GO:0010243	response to organonitrogen compound	102	8	8.29	1497	0.59486	0.22486
GO:0055002	striated muscle cell development	54	4	4.39	1625	0.64951	0.22489
GO:0007091	metaphase/anaphase transition of mitotic cell cycle	30	2	2.44	1767	0.71311	0.22491
GO:0007450	dorsal/ventral pattern formation, imaginal disc	45	3	3.66	1793	0.71999	0.22499
GO:0035265	organ growth	61	3	4.96	2145	0.8832	0.22544
GO:0048638	regulation of developmental growth	188	12	15.27	2068	0.84714	0.22593
GO:0019637	organophosphate metabolic process	339	21	27.54	2281	0.92865	0.22715
GO:0035159	regulation of tube length, open tracheal system	31	4	2.52	687	0.24151	0.24055
GO:0042059	negative regulation of epidermal growth factor receptor signaling pathway	31	4	2.52	688	0.24151	0.24151
GO:0007548	sex differentiation	80	21	6.5	7	9.4e-07	0.2458
GO:0008283	cell proliferation	305	27	24.78	891	0.34757	0.24839
GO:0008586	imaginal disc-derived wing vein morphogenesis	42	5	3.41	697	0.25286	0.25286
GO:0016476	regulation of embryonic cell shape	23	3	1.87	745	0.28601	0.25429
GO:0006805	xenobiotic metabolic process	12	2	0.97	699	0.25436	0.25436
GO:0007016	cytoskeletal anchoring at plasma membrane	12	2	0.97	700	0.25436	0.25436
GO:0010107	potassium ion import	12	2	0.97	701	0.25436	0.25436
GO:0030536	larval feeding behavior	12	2	0.97	702	0.25436	0.25436
GO:0034389	lipid particle organization	12	2	0.97	703	0.25436	0.25436
GO:0034614	cellular response to reactive oxygen species	12	2	0.97	704	0.25436	0.25436
GO:0002168	instar larval development	60	7	4.87	644	0.21199	0.26247
GO:0061057	peptidoglycan recognition protein signaling pathway	22	3	1.79	720	0.26323	0.26323
GO:0055059	asymmetric neuroblast division	38	4	3.09	915	0.37303	0.26349
GO:0009950	dorsal/ventral axis specification	70	6	5.69	1298	0.50825	0.26399
GO:0042060	wound healing	77	8	6.26	749	0.28658	0.27273
GO:0030198	extracellular matrix organization	45	13	3.66	16	3.8e-05	0.2798
GO:0010927	cellular component assembly involved in morphogenesis	125	17	10.16	234	0.02389	0.28486
GO:0009166	nucleotide catabolic process	30	4	2.44	674	0.22354	0.28515
GO:0001510	RNA methylation	41	9	3.33	111	0.0048	0.28539
GO:0030497	fatty acid elongation	17	7	1.38	30	0.00021	0.28542
GO:0007204	positive regulation of cytosolic calcium ion concentration	13	2	1.06	733	0.28557	0.28557
GO:0035002	liquid clearance, open tracheal system	13	2	1.06	734	0.28557	0.28557
GO:0036098	male germ-line stem cell population maintenance	13	2	1.06	735	0.28557	0.28557
GO:0030490	maturation of SSU-rRNA	46	4	3.74	1319	0.52052	0.28604
GO:0035167	larval lymph gland hemopoiesis	36	4	2.92	803	0.33497	0.28606
GO:0010632	regulation of epithelial cell migration	15	5	1.22	116	0.00526	0.2862
GO:0010557	positive regulation of macromolecule biosynthetic process	356	32	28.92	761	0.29773	0.28645
GO:0000469	cleavage involved in rRNA processing	19	4	1.54	359	0.06278	0.28677
GO:0051651	maintenance of location in cell	33	5	2.68	507	0.12536	0.28682
GO:0006109	regulation of carbohydrate metabolic process	21	4	1.71	428	0.08538	0.28684
GO:0035051	cardiocyte differentiation	21	4	1.71	429	0.08538	0.28684
GO:0006726	eye pigment biosynthetic process	34	5	2.76	548	0.13776	0.28686
GO:0035154	terminal cell fate specification, open tracheal system	10	3	0.81	287	0.04158	0.28688
GO:0007485	imaginal disc-derived male genitalia development	18	3	1.46	592	0.17562	0.28716
GO:0006165	nucleoside diphosphate phosphorylation	21	3	1.71	682	0.2407	0.28726
GO:0006826	iron ion transport	9	2	0.73	578	0.16225	0.28727
GO:0044057	regulation of system process	47	5	3.82	802	0.33392	0.28731
GO:0050714	positive regulation of protein secretion	11	2	0.89	665	0.22322	0.28734
GO:1905954	positive regulation of lipid localization	11	2	0.89	666	0.22322	0.28734
GO:0043687	post-translational protein modification	12	2	0.97	705	0.25436	0.28738
GO:0071901	negative regulation of protein serine/threonine kinase activity	12	2	0.97	706	0.25436	0.28738
GO:0006963	positive regulation of antibacterial peptide biosynthetic process	15	2	1.22	878	0.34739	0.28748
GO:0035196	production of miRNAs involved in gene silencing by miRNA	16	2	1.3	923	0.37765	0.28752
GO:0002684	positive regulation of immune system process	74	6	6.01	1408	0.56396	0.28782
GO:0009206	purine ribonucleoside triphosphate biosynthetic process	42	3	3.41	1684	0.67486	0.28799
GO:0030041	actin filament polymerization	56	3	4.55	2058	0.84461	0.28848
GO:0030705	cytoskeleton-dependent intracellular transport	56	3	4.55	2059	0.84461	0.28848
GO:0032886	regulation of microtubule-based process	44	2	3.57	2147	0.88321	0.28849
GO:0006091	generation of precursor metabolites and energy	151	9	12.27	2128	0.87499	0.28851
GO:0099504	synaptic vesicle cycle	100	4	8.12	2415	0.96734	0.28959
GO:0010604	positive regulation of macromolecule metabolic process	595	42	48.34	2105	0.85867	0.29077
GO:0006364	rRNA processing	132	17	10.72	274	0.03802	0.2916
GO:2000112	regulation of cellular macromolecule biosynthetic process	1021	62	82.95	2583	0.99688	0.29815
GO:0051171	regulation of nitrogen compound metabolic process	1445	82	117.4	2700	0.99997	0.30645
GO:0000470	maturation of LSU-rRNA	24	3	1.95	765	0.30894	0.30894
GO:0048749	compound eye development	304	27	24.7	808	0.34106	0.31502
GO:0016334	establishment or maintenance of polarity of follicular epithelium	26	3	2.11	902	0.35488	0.31662
GO:0007464	R3/R4 cell fate commitment	14	2	1.14	776	0.31664	0.31664
GO:0045494	photoreceptor cell maintenance	14	2	1.14	777	0.31664	0.31664
GO:0048803	imaginal disc-derived male genitalia morphogenesis	14	2	1.14	778	0.31664	0.31664
GO:0051129	negative regulation of cellular component organization	136	6	11.05	2426	0.96998	0.32105
GO:0007498	mesoderm development	75	10	6.09	412	0.08055	0.33035
GO:0090090	negative regulation of canonical Wnt signaling pathway	25	3	2.03	798	0.33192	0.33192
GO:0007623	circadian rhythm	129	8	10.48	2042	0.83365	0.33531
GO:0002065	columnar/cuboidal epithelial cell differentiation	288	33	23.4	240	0.02671	0.34086
GO:0009792	embryo development ending in birth or egg hatching	157	19	12.76	311	0.05079	0.34262
GO:0048865	stem cell fate commitment	26	8	2.11	55	0.00076	0.34285
GO:0010001	glial cell differentiation	35	7	2.84	205	0.02045	0.34369
GO:0017145	stem cell division	84	9	6.82	686	0.24086	0.34466
GO:0031125	rRNA 3'-end processing	10	3	0.81	288	0.04158	0.34466
GO:0042684	cardioblast cell fate commitment	10	3	0.81	289	0.04158	0.34466
GO:0006739	NADP metabolic process	12	3	0.97	370	0.06755	0.34474
GO:1904799	regulation of neuron remodeling	10	2	0.81	616	0.19242	0.34515
GO:0005977	glycogen metabolic process	24	3	1.95	766	0.30894	0.34522
GO:0000447	endonucleolytic cleavage in ITS1 to separate SSU-rRNA from 5.8S rRNA and LSU-rRNA from tricistronic ...	5	1	0.41	809	0.34544	0.34544
GO:0002792	negative regulation of peptide secretion	5	1	0.41	810	0.34544	0.34544
GO:0006031	chitin biosynthetic process	5	1	0.41	811	0.34544	0.34544
GO:0006034	cuticle chitin metabolic process	5	1	0.41	812	0.34544	0.34544
GO:0006501	C-terminal protein lipidation	5	1	0.41	813	0.34544	0.34544
GO:0006723	cuticle hydrocarbon biosynthetic process	5	1	0.41	814	0.34544	0.34544
GO:0006777	Mo-molybdopterin cofactor biosynthetic process	5	1	0.41	815	0.34544	0.34544
GO:0006939	smooth muscle contraction	5	1	0.41	816	0.34544	0.34544
GO:0007191	adenylate cyclase-activating dopamine receptor signaling pathway	5	1	0.41	817	0.34544	0.34544
GO:0007451	dorsal/ventral lineage restriction, imaginal disc	5	1	0.41	818	0.34544	0.34544
GO:0007486	imaginal disc-derived female genitalia development	5	1	0.41	819	0.34544	0.34544
GO:0007487	analia development	5	1	0.41	820	0.34544	0.34544
GO:0009147	pyrimidine nucleoside triphosphate metabolic process	5	1	0.41	821	0.34544	0.34544
GO:0015837	amine transport	5	1	0.41	822	0.34544	0.34544
GO:0016601	Rac protein signal transduction	5	1	0.41	823	0.34544	0.34544
GO:0019099	female germ-line sex determination	5	1	0.41	824	0.34544	0.34544
GO:0021954	central nervous system neuron development	5	1	0.41	825	0.34544	0.34544
GO:0022600	digestive system process	5	1	0.41	826	0.34544	0.34544
GO:0030104	water homeostasis	5	1	0.41	827	0.34544	0.34544
GO:0030335	positive regulation of cell migration	5	1	0.41	828	0.34544	0.34544
GO:0031623	receptor internalization	5	1	0.41	829	0.34544	0.34544
GO:0032780	negative regulation of ATPase activity	5	1	0.41	830	0.34544	0.34544
GO:0034453	microtubule anchoring	5	1	0.41	831	0.34544	0.34544
GO:0034755	iron ion transmembrane transport	5	1	0.41	832	0.34544	0.34544
GO:0035721	intraciliary retrograde transport	5	1	0.41	833	0.34544	0.34544
GO:0038061	NIK/NF-kappaB signaling	5	1	0.41	834	0.34544	0.34544
GO:0042682	regulation of compound eye cone cell fate specification	5	1	0.41	835	0.34544	0.34544
GO:0042688	crystal cell differentiation	5	1	0.41	836	0.34544	0.34544
GO:0042694	muscle cell fate specification	5	1	0.41	837	0.34544	0.34544
GO:0043096	purine nucleobase salvage	5	1	0.41	838	0.34544	0.34544
GO:0043388	positive regulation of DNA binding	5	1	0.41	839	0.34544	0.34544
GO:0045069	regulation of viral genome replication	5	1	0.41	840	0.34544	0.34544
GO:0045464	R8 cell fate specification	5	1	0.41	841	0.34544	0.34544
GO:0046132	pyrimidine ribonucleoside biosynthetic process	5	1	0.41	842	0.34544	0.34544
GO:0048076	regulation of compound eye pigmentation	5	1	0.41	843	0.34544	0.34544
GO:0048383	mesectoderm development	5	1	0.41	844	0.34544	0.34544
GO:0048644	muscle organ morphogenesis	5	1	0.41	845	0.34544	0.34544
GO:0050482	arachidonic acid secretion	5	1	0.41	846	0.34544	0.34544
GO:0050848	regulation of calcium-mediated signaling	5	1	0.41	847	0.34544	0.34544
GO:0050916	sensory perception of sweet taste	5	1	0.41	848	0.34544	0.34544
GO:0051569	regulation of histone H3-K4 methylation	5	1	0.41	849	0.34544	0.34544
GO:0060439	trachea morphogenesis	5	1	0.41	850	0.34544	0.34544
GO:0060914	heart formation	5	1	0.41	851	0.34544	0.34544
GO:0070873	regulation of glycogen metabolic process	5	1	0.41	852	0.34544	0.34544
GO:0070920	regulation of production of small RNA involved in gene silencing by RNA	5	1	0.41	853	0.34544	0.34544
GO:0071051	polyadenylation-dependent snoRNA 3'-end processing	5	1	0.41	854	0.34544	0.34544
GO:0090382	phagosome maturation	5	1	0.41	855	0.34544	0.34544
GO:0097191	extrinsic apoptotic signaling pathway	5	1	0.41	856	0.34544	0.34544
GO:0097374	sensory neuron axon guidance	5	1	0.41	857	0.34544	0.34544
GO:0098700	neurotransmitter loading into synaptic vesicle	5	1	0.41	858	0.34544	0.34544
GO:1900078	positive regulation of cellular response to insulin stimulus	5	1	0.41	859	0.34544	0.34544
GO:1901070	guanosine-containing compound biosynthetic process	5	1	0.41	860	0.34544	0.34544
GO:1904801	positive regulation of neuron remodeling	5	1	0.41	861	0.34544	0.34544
GO:2000677	regulation of transcription regulatory region DNA binding	5	1	0.41	862	0.34544	0.34544
GO:2001022	positive regulation of response to DNA damage stimulus	5	1	0.41	863	0.34544	0.34544
GO:0043902	positive regulation of multi-organism process	43	4	3.49	1193	0.46673	0.34549
GO:0006898	receptor-mediated endocytosis	33	3	2.68	1299	0.50918	0.34558
GO:0006575	cellular modified amino acid metabolic process	63	5	5.12	1483	0.58898	0.34579
GO:0035151	regulation of tube size, open tracheal system	46	6	3.74	582	0.16667	0.34623
GO:0071214	cellular response to abiotic stimulus	63	4	5.12	1898	0.76436	0.34628
GO:0044272	sulfur compound biosynthetic process	33	4	2.68	730	0.27834	0.34697
GO:0016266	O-glycan processing	15	2	1.22	879	0.34739	0.34739
GO:1901700	response to oxygen-containing compound	219	17	17.79	1562	0.61578	0.34865
GO:0031399	regulation of protein modification process	296	18	24.05	2268	0.92737	0.34882
GO:0050790	regulation of catalytic activity	292	15	23.72	2488	0.98317	0.35017
GO:0044085	cellular component biogenesis	1107	81	89.94	2126	0.87091	0.35092
GO:0007059	chromosome segregation	170	7	13.81	2509	0.98777	0.35341
GO:0008587	imaginal disc-derived wing margin morphogenesis	44	4	3.57	1202	0.48492	0.35534
GO:0000902	cell morphogenesis	466	54	37.86	108	0.00435	0.36073
GO:0006487	protein N-linked glycosylation	32	5	2.6	486	0.11351	0.37626
GO:0045807	positive regulation of endocytosis	29	4	2.36	635	0.20594	0.37688
GO:0009649	entrainment of circadian clock	16	2	1.3	924	0.37765	0.37765
GO:0032012	regulation of ARF protein signal transduction	16	2	1.3	925	0.37765	0.37765
GO:0046854	phosphatidylinositol phosphorylation	16	2	1.3	926	0.37765	0.37765
GO:0008347	glial cell migration	27	3	2.19	940	0.37772	0.37772
GO:0033674	positive regulation of kinase activity	70	5	5.69	1709	0.68265	0.3788
GO:0022411	cellular component disassembly	109	4	8.86	2474	0.98097	0.38225
GO:0031175	neuron projection development	388	46	31.52	122	0.00542	0.39069
GO:0042254	ribosome biogenesis	197	34	16.01	14	1.8e-05	0.3921
GO:0048569	post-embryonic animal organ development	369	39	29.98	314	0.05169	0.39383
GO:0048477	oogenesis	552	50	44.85	656	0.22292	0.39459
GO:0001736	establishment of planar polarity	88	13	7.15	237	0.02463	0.39486
GO:0070887	cellular response to chemical stimulus	314	32	25.51	475	0.10542	0.3953
GO:0007442	hindgut morphogenesis	46	10	3.74	96	0.00324	0.39554
GO:0043436	oxoacid metabolic process	332	33	26.97	515	0.12913	0.39555
GO:0001654	eye development	322	31	26.16	594	0.18121	0.39622
GO:0055085	transmembrane transport	447	34	36.32	1712	0.68671	0.39643
GO:0045785	positive regulation of cell adhesion	16	5	1.3	137	0.00714	0.39694
GO:0032259	methylation	114	12	9.26	645	0.21388	0.39744
GO:0046129	purine ribonucleoside biosynthetic process	11	2	0.89	667	0.22322	0.39834
GO:0072348	sulfur compound transport	16	2	1.3	927	0.37765	0.39856
GO:0000729	DNA double-strand break processing	6	1	0.49	953	0.39866	0.39866
GO:0005978	glycogen biosynthetic process	6	1	0.49	954	0.39866	0.39866
GO:0006013	mannose metabolic process	6	1	0.49	955	0.39866	0.39866
GO:0006356	regulation of transcription by RNA polymerase I	6	1	0.49	956	0.39866	0.39866
GO:0006884	cell volume homeostasis	6	1	0.49	957	0.39866	0.39866
GO:0007348	regulation of syncytial blastoderm mitotic cell cycle	6	1	0.49	958	0.39866	0.39866
GO:0007425	epithelial cell fate determination, open tracheal system	6	1	0.49	959	0.39866	0.39866
GO:0007477	notum development	6	1	0.49	960	0.39866	0.39866
GO:0007506	gonadal mesoderm development	6	1	0.49	961	0.39866	0.39866
GO:0009226	nucleotide-sugar biosynthetic process	6	1	0.49	962	0.39866	0.39866
GO:0009303	rRNA transcription	6	1	0.49	963	0.39866	0.39866
GO:0010496	intercellular transport	6	1	0.49	964	0.39866	0.39866
GO:0016114	terpenoid biosynthetic process	6	1	0.49	965	0.39866	0.39866
GO:0016540	protein autoprocessing	6	1	0.49	966	0.39866	0.39866
GO:0019101	female somatic sex determination	6	1	0.49	967	0.39866	0.39866
GO:0019226	transmission of nerve impulse	6	1	0.49	968	0.39866	0.39866
GO:0030336	negative regulation of cell migration	6	1	0.49	969	0.39866	0.39866
GO:0030728	ovulation	6	1	0.49	970	0.39866	0.39866
GO:0030950	establishment or maintenance of actin cytoskeleton polarity	6	1	0.49	971	0.39866	0.39866
GO:0031397	negative regulation of protein ubiquitination	6	1	0.49	972	0.39866	0.39866
GO:0032367	intracellular cholesterol transport	6	1	0.49	973	0.39866	0.39866
GO:0032922	circadian regulation of gene expression	6	1	0.49	974	0.39866	0.39866
GO:0032924	activin receptor signaling pathway	6	1	0.49	975	0.39866	0.39866
GO:0034067	protein localization to Golgi apparatus	6	1	0.49	976	0.39866	0.39866
GO:0035074	pupation	6	1	0.49	977	0.39866	0.39866
GO:0035094	response to nicotine	6	1	0.49	978	0.39866	0.39866
GO:0035224	genital disc anterior/posterior pattern formation	6	1	0.49	979	0.39866	0.39866
GO:0043266	regulation of potassium ion transport	6	1	0.49	980	0.39866	0.39866
GO:0043519	regulation of myosin II filament organization	6	1	0.49	981	0.39866	0.39866
GO:0044036	cell wall macromolecule metabolic process	6	1	0.49	982	0.39866	0.39866
GO:0044130	negative regulation of growth of symbiont in host	6	1	0.49	983	0.39866	0.39866
GO:0045199	maintenance of epithelial cell apical/basal polarity	6	1	0.49	984	0.39866	0.39866
GO:0046039	GTP metabolic process	6	1	0.49	985	0.39866	0.39866
GO:0046085	adenosine metabolic process	6	1	0.49	986	0.39866	0.39866
GO:0046665	amnioserosa maintenance	6	1	0.49	987	0.39866	0.39866
GO:0046688	response to copper ion	6	1	0.49	988	0.39866	0.39866
GO:0048148	behavioral response to cocaine	6	1	0.49	989	0.39866	0.39866
GO:0048636	positive regulation of muscle organ development	6	1	0.49	990	0.39866	0.39866
GO:0055078	sodium ion homeostasis	6	1	0.49	991	0.39866	0.39866
GO:0090481	pyrimidine nucleotide-sugar transmembrane transport	6	1	0.49	992	0.39866	0.39866
GO:0097206	nephrocyte filtration	6	1	0.49	993	0.39866	0.39866
GO:1900087	positive regulation of G1/S transition of mitotic cell cycle	6	1	0.49	994	0.39866	0.39866
GO:1901216	positive regulation of neuron death	6	1	0.49	995	0.39866	0.39866
GO:2000104	negative regulation of DNA-dependent DNA replication	6	1	0.49	996	0.39866	0.39866
GO:2000105	positive regulation of DNA-dependent DNA replication	6	1	0.49	997	0.39866	0.39866
GO:2000370	positive regulation of clathrin-dependent endocytosis	6	1	0.49	998	0.39866	0.39866
GO:0000086	G2/M transition of mitotic cell cycle	34	3	2.76	1325	0.5297	0.39881
GO:0051294	establishment of spindle orientation	22	2	1.79	1384	0.54372	0.39882
GO:0035088	establishment or maintenance of apical/basal cell polarity	35	3	2.84	1396	0.54974	0.39885
GO:0045927	positive regulation of growth	91	6	7.39	1862	0.75982	0.3997
GO:0120031	plasma membrane bounded cell projection assembly	91	4	7.39	2326	0.94504	0.40078
GO:0045786	negative regulation of cell cycle	94	4	7.64	2354	0.95369	0.40092
GO:0042067	establishment of ommatidial planar polarity	50	10	4.06	128	0.00609	0.40277
GO:0008340	determination of adult lifespan	134	12	10.89	1023	0.40632	0.40632
GO:0032507	maintenance of protein location in cell	29	4	2.36	636	0.20594	0.40645
GO:0006096	glycolytic process	17	2	1.38	1024	0.40732	0.40732
GO:0007469	antennal development	17	2	1.38	1025	0.40732	0.40732
GO:0045176	apical protein localization	17	2	1.38	1026	0.40732	0.40732
GO:0031032	actomyosin structure organization	86	5	6.99	2049	0.83887	0.40956
GO:0010647	positive regulation of cell communication	311	19	25.27	2282	0.92919	0.41341
GO:0023056	positive regulation of signaling	311	19	25.27	2283	0.92919	0.41341
GO:0051603	proteolysis involved in cellular protein catabolic process	231	9	18.77	2589	0.997	0.4164
GO:0007186	G-protein coupled receptor signaling pathway	136	10	11.05	1692	0.67626	0.41953
GO:0007015	actin filament organization	129	9	10.48	1809	0.73152	0.42016
GO:0008407	chaeta morphogenesis	29	3	2.36	1052	0.42284	0.42284
GO:0043604	amide biosynthetic process	449	42	36.48	595	0.18404	0.43163
GO:0006400	tRNA modification	48	9	3.9	178	0.01383	0.43225
GO:0098754	detoxification	26	3	2.11	903	0.35488	0.43598
GO:0006491	N-glycan processing	18	2	1.46	1064	0.43628	0.43628
GO:0030968	endoplasmic reticulum unfolded protein response	18	2	1.46	1065	0.43628	0.43628
GO:0035293	chitin-based larval cuticle pattern formation	18	2	1.46	1066	0.43628	0.43628
GO:0046529	imaginal disc fusion, thorax closure	18	2	1.46	1067	0.43628	0.43628
GO:0046839	phospholipid dephosphorylation	18	2	1.46	1068	0.43628	0.43628
GO:0090288	negative regulation of cellular response to growth factor stimulus	18	2	1.46	1069	0.43628	0.43628
GO:0010648	negative regulation of cell communication	278	21	22.59	1681	0.6714	0.43822
GO:0023057	negative regulation of signaling	278	21	22.59	1682	0.6714	0.43822
GO:0007416	synapse assembly	149	8	12.11	2264	0.92585	0.44043
GO:0001700	embryonic development via the syncytial blastoderm	152	18	12.35	363	0.06668	0.44153
GO:0045455	ecdysteroid metabolic process	28	7	2.27	125	0.0059	0.44506
GO:0035309	wing and notum subfield formation	12	3	0.97	371	0.06755	0.44663
GO:0030048	actin filament-based movement	26	4	2.11	565	0.15594	0.44671
GO:0043647	inositol phosphate metabolic process	15	3	1.22	493	0.1168	0.44677
GO:0006360	transcription by RNA polymerase I	13	2	1.06	736	0.28557	0.44726
GO:0048260	positive regulation of receptor-mediated endocytosis	13	2	1.06	737	0.28557	0.44726
GO:0003383	apical constriction	17	2	1.38	1027	0.40732	0.44744
GO:0000055	ribosomal large subunit export from nucleus	7	1	0.57	1096	0.44755	0.44755
GO:0000712	resolution of meiotic recombination intermediates	7	1	0.57	1097	0.44755	0.44755
GO:0001682	tRNA 5'-leader removal	7	1	0.57	1098	0.44755	0.44755
GO:0006541	glutamine metabolic process	7	1	0.57	1099	0.44755	0.44755
GO:0007111	meiosis II cytokinesis	7	1	0.57	1100	0.44755	0.44755
GO:0007380	specification of segmental identity, head	7	1	0.57	1101	0.44755	0.44755
GO:0007539	primary sex determination, soma	7	1	0.57	1102	0.44755	0.44755
GO:0009220	pyrimidine ribonucleotide biosynthetic process	7	1	0.57	1103	0.44755	0.44755
GO:0010884	positive regulation of lipid storage	7	1	0.57	1104	0.44755	0.44755
GO:0016335	morphogenesis of larval imaginal disc epithelium	7	1	0.57	1105	0.44755	0.44755
GO:0030856	regulation of epithelial cell differentiation	7	1	0.57	1106	0.44755	0.44755
GO:0031034	myosin filament assembly	7	1	0.57	1107	0.44755	0.44755
GO:0031053	primary miRNA processing	7	1	0.57	1108	0.44755	0.44755
GO:0031054	pre-miRNA processing	7	1	0.57	1109	0.44755	0.44755
GO:0031118	rRNA pseudouridine synthesis	7	1	0.57	1110	0.44755	0.44755
GO:0032368	regulation of lipid transport	7	1	0.57	1111	0.44755	0.44755
GO:0032413	negative regulation of ion transmembrane transporter activity	7	1	0.57	1112	0.44755	0.44755
GO:0032414	positive regulation of ion transmembrane transporter activity	7	1	0.57	1113	0.44755	0.44755
GO:0033353	S-adenosylmethionine cycle	7	1	0.57	1114	0.44755	0.44755
GO:0033539	fatty acid beta-oxidation using acyl-CoA dehydrogenase	7	1	0.57	1115	0.44755	0.44755
GO:0034030	ribonucleoside bisphosphate biosynthetic process	7	1	0.57	1116	0.44755	0.44755
GO:0034033	purine nucleoside bisphosphate biosynthetic process	7	1	0.57	1117	0.44755	0.44755
GO:0034394	protein localization to cell surface	7	1	0.57	1118	0.44755	0.44755
GO:0035262	gonad morphogenesis	7	1	0.57	1119	0.44755	0.44755
GO:0042595	behavioral response to starvation	7	1	0.57	1120	0.44755	0.44755
GO:0044728	DNA methylation or demethylation	7	1	0.57	1121	0.44755	0.44755
GO:0045842	positive regulation of mitotic metaphase/anaphase transition	7	1	0.57	1122	0.44755	0.44755
GO:0046113	nucleobase catabolic process	7	1	0.57	1123	0.44755	0.44755
GO:0046130	purine ribonucleoside catabolic process	7	1	0.57	1124	0.44755	0.44755
GO:0046533	negative regulation of photoreceptor cell differentiation	7	1	0.57	1125	0.44755	0.44755
GO:0046664	dorsal closure, amnioserosa morphology change	7	1	0.57	1126	0.44755	0.44755
GO:0046825	regulation of protein export from nucleus	7	1	0.57	1127	0.44755	0.44755
GO:0046831	regulation of RNA export from nucleus	7	1	0.57	1128	0.44755	0.44755
GO:0046902	regulation of mitochondrial membrane permeability	7	1	0.57	1129	0.44755	0.44755
GO:0048567	ectodermal digestive tract morphogenesis	7	1	0.57	1130	0.44755	0.44755
GO:0050982	detection of mechanical stimulus	7	1	0.57	1131	0.44755	0.44755
GO:0051238	sequestering of metal ion	7	1	0.57	1132	0.44755	0.44755
GO:0051926	negative regulation of calcium ion transport	7	1	0.57	1133	0.44755	0.44755
GO:0055083	monovalent inorganic anion homeostasis	7	1	0.57	1134	0.44755	0.44755
GO:0061357	positive regulation of Wnt protein secretion	7	1	0.57	1135	0.44755	0.44755
GO:0070286	axonemal dynein complex assembly	7	1	0.57	1136	0.44755	0.44755
GO:0070475	rRNA base methylation	7	1	0.57	1137	0.44755	0.44755
GO:0072529	pyrimidine-containing compound catabolic process	7	1	0.57	1138	0.44755	0.44755
GO:0080009	mRNA methylation	7	1	0.57	1139	0.44755	0.44755
GO:0090527	actin filament reorganization	7	1	0.57	1140	0.44755	0.44755
GO:0097104	postsynaptic membrane assembly	7	1	0.57	1141	0.44755	0.44755
GO:1901019	regulation of calcium ion transmembrane transporter activity	7	1	0.57	1142	0.44755	0.44755
GO:1901739	regulation of myoblast fusion	7	1	0.57	1143	0.44755	0.44755
GO:1903076	regulation of protein localization to plasma membrane	7	1	0.57	1144	0.44755	0.44755
GO:1903828	negative regulation of cellular protein localization	7	1	0.57	1145	0.44755	0.44755
GO:1904063	negative regulation of cation transmembrane transport	7	1	0.57	1146	0.44755	0.44755
GO:0003012	muscle system process	32	3	2.6	1205	0.48819	0.44757
GO:0090068	positive regulation of cell cycle process	33	3	2.68	1300	0.50918	0.44762
GO:0030522	intracellular receptor signaling pathway	21	2	1.71	1306	0.51822	0.44763
GO:0030177	positive regulation of Wnt signaling pathway	35	3	2.84	1397	0.54974	0.44771
GO:0042386	hemocyte differentiation	36	3	2.92	1423	0.56927	0.44776
GO:1901576	organic substance biosynthetic process	1984	153	161.19	1960	0.79808	0.45439
GO:0042737	drug catabolic process	51	9	4.14	203	0.0202	0.46178
GO:0007430	terminal branching, open tracheal system	19	2	1.54	1182	0.46446	0.46446
GO:0008362	chitin-based embryonic cuticle biosynthetic process	19	2	1.54	1183	0.46446	0.46446
GO:0042332	gravitaxis	19	2	1.54	1184	0.46446	0.46446
GO:0045466	R7 cell differentiation	50	6	4.06	646	0.21756	0.46512
GO:0046331	lateral inhibition	31	3	2.52	1196	0.46678	0.46678
GO:0045089	positive regulation of innate immune response	47	4	3.82	1381	0.53788	0.46713
GO:0031323	regulation of cellular metabolic process	1501	80	121.95	2716	1	0.47761
GO:0007480	imaginal disc-derived leg morphogenesis	65	8	5.28	557	0.15476	0.48182
GO:0003333	amino acid transmembrane transport	32	3	2.6	1206	0.48819	0.48819
GO:0006915	apoptotic process	231	19	18.77	1303	0.51326	0.4884
GO:0042274	ribosomal small subunit biogenesis	63	10	5.12	251	0.02939	0.48971
GO:0008543	fibroblast growth factor receptor signaling pathway	15	5	1.22	117	0.00526	0.49039
GO:1901570	fatty acid derivative biosynthetic process	21	4	1.71	430	0.08538	0.4913
GO:0007390	germ-band shortening	20	2	1.62	1209	0.49179	0.49179
GO:0016199	axon midline choice point recognition	20	2	1.62	1210	0.49179	0.49179
GO:0046580	negative regulation of Ras protein signal transduction	20	2	1.62	1211	0.49179	0.49179
GO:0001742	oenocyte differentiation	8	1	0.65	1221	0.49248	0.49248
GO:0006488	dolichol-linked oligosaccharide biosynthetic process	8	1	0.65	1222	0.49248	0.49248
GO:0006688	glycosphingolipid biosynthetic process	8	1	0.65	1223	0.49248	0.49248
GO:0006896	Golgi to vacuole transport	8	1	0.65	1224	0.49248	0.49248
GO:0007158	neuron cell-cell adhesion	8	1	0.65	1225	0.49248	0.49248
GO:0007289	spermatid nucleus differentiation	8	1	0.65	1226	0.49248	0.49248
GO:0007319	negative regulation of oskar mRNA translation	8	1	0.65	1227	0.49248	0.49248
GO:0007343	egg activation	8	1	0.65	1228	0.49248	0.49248
GO:0007523	larval visceral muscle development	8	1	0.65	1229	0.49248	0.49248
GO:0008637	apoptotic mitochondrial changes	8	1	0.65	1230	0.49248	0.49248
GO:0009407	toxin catabolic process	8	1	0.65	1231	0.49248	0.49248
GO:0009642	response to light intensity	8	1	0.65	1232	0.49248	0.49248
GO:0015807	L-amino acid transport	8	1	0.65	1233	0.49248	0.49248
GO:0019221	cytokine-mediated signaling pathway	8	1	0.65	1234	0.49248	0.49248
GO:0030206	chondroitin sulfate biosynthetic process	8	1	0.65	1235	0.49248	0.49248
GO:0033314	mitotic DNA replication checkpoint	8	1	0.65	1236	0.49248	0.49248
GO:0034975	protein folding in endoplasmic reticulum	8	1	0.65	1237	0.49248	0.49248
GO:0035204	negative regulation of lamellocyte differentiation	8	1	0.65	1238	0.49248	0.49248
GO:0043407	negative regulation of MAP kinase activity	8	1	0.65	1239	0.49248	0.49248
GO:0043697	cell dedifferentiation	8	1	0.65	1240	0.49248	0.49248
GO:0045477	regulation of nurse cell apoptotic process	8	1	0.65	1241	0.49248	0.49248
GO:0046673	negative regulation of compound eye retinal cell programmed cell death	8	1	0.65	1242	0.49248	0.49248
GO:0046686	response to cadmium ion	8	1	0.65	1243	0.49248	0.49248
GO:0048009	insulin-like growth factor receptor signaling pathway	8	1	0.65	1244	0.49248	0.49248
GO:0048738	cardiac muscle tissue development	8	1	0.65	1245	0.49248	0.49248
GO:0048935	peripheral nervous system neuron development	8	1	0.65	1246	0.49248	0.49248
GO:0050907	detection of chemical stimulus involved in sensory perception	8	1	0.65	1247	0.49248	0.49248
GO:0055075	potassium ion homeostasis	8	1	0.65	1248	0.49248	0.49248
GO:0061327	anterior Malpighian tubule development	8	1	0.65	1249	0.49248	0.49248
GO:0072697	protein localization to cell cortex	8	1	0.65	1250	0.49248	0.49248
GO:0097105	presynaptic membrane assembly	8	1	0.65	1251	0.49248	0.49248
GO:0098659	inorganic cation import across plasma membrane	8	1	0.65	1252	0.49248	0.49248
GO:1902669	positive regulation of axon guidance	8	1	0.65	1253	0.49248	0.49248
GO:1903053	regulation of extracellular matrix organization	8	1	0.65	1254	0.49248	0.49248
GO:1903531	negative regulation of secretion by cell	8	1	0.65	1255	0.49248	0.49248
GO:1904064	positive regulation of cation transmembrane transport	8	1	0.65	1256	0.49248	0.49248
GO:2000242	negative regulation of reproductive process	8	1	0.65	1257	0.49248	0.49248
GO:0009755	hormone-mediated signaling pathway	35	3	2.84	1398	0.54974	0.4926
GO:0040001	establishment of mitotic spindle localization	24	2	1.95	1486	0.59184	0.49266
GO:0008544	epidermis development	50	3	4.06	1937	0.78416	0.49334
GO:0007298	border follicle cell migration	106	9	8.61	1291	0.49631	0.49631
GO:0042127	regulation of cell proliferation	192	16	15.6	1290	0.49631	0.50909
GO:0006790	sulfur compound metabolic process	128	13	10.4	679	0.23906	0.51603
GO:0035162	embryonic hemopoiesis	21	2	1.71	1307	0.51822	0.51822
GO:0044283	small molecule biosynthetic process	194	30	15.76	42	0.00042	0.52471
GO:0048565	digestive tract development	85	18	6.91	24	0.00013	0.52687
GO:0009267	cellular response to starvation	59	5	4.79	1324	0.52923	0.52923
GO:0016203	muscle attachment	34	3	2.76	1326	0.5297	0.5297
GO:0042446	hormone biosynthetic process	29	7	2.36	140	0.00725	0.531
GO:0030334	regulation of cell migration	31	7	2.52	164	0.0106	0.53111
GO:0007476	imaginal disc-derived wing morphogenesis	220	21	17.87	693	0.24927	0.53129
GO:0010629	negative regulation of gene expression	472	31	38.35	2239	0.91746	0.53156
GO:0032879	regulation of localization	351	32	28.52	726	0.26975	0.53165
GO:1901605	alpha-amino acid metabolic process	88	10	7.15	590	0.17526	0.53212
GO:0046667	compound eye retinal cell programmed cell death	25	4	2.03	549	0.14041	0.53269
GO:0035172	hemocyte proliferation	43	5	3.49	724	0.26873	0.53298
GO:0050708	regulation of protein secretion	20	3	1.62	650	0.21851	0.53306
GO:0006520	cellular amino acid metabolic process	145	13	11.78	952	0.39742	0.53315
GO:0034620	cellular response to unfolded protein	27	3	2.19	941	0.37772	0.53342
GO:0009593	detection of chemical stimulus	17	2	1.38	1028	0.40732	0.53354
GO:1902667	regulation of axon guidance	17	2	1.38	1029	0.40732	0.53354
GO:0030011	maintenance of cell polarity	18	2	1.46	1070	0.43628	0.53359
GO:0090502	RNA phosphodiester bond hydrolysis, endonucleolytic	19	2	1.54	1185	0.46446	0.53364
GO:0001508	action potential	9	1	0.73	1330	0.53376	0.53376
GO:0006072	glycerol-3-phosphate metabolic process	9	1	0.73	1331	0.53376	0.53376
GO:0006614	SRP-dependent cotranslational protein targeting to membrane	9	1	0.73	1332	0.53376	0.53376
GO:0006937	regulation of muscle contraction	9	1	0.73	1333	0.53376	0.53376
GO:0007519	skeletal muscle tissue development	9	1	0.73	1334	0.53376	0.53376
GO:0009086	methionine biosynthetic process	9	1	0.73	1335	0.53376	0.53376
GO:0009253	peptidoglycan catabolic process	9	1	0.73	1336	0.53376	0.53376
GO:0018242	protein O-linked glycosylation via serine	9	1	0.73	1337	0.53376	0.53376
GO:0031000	response to caffeine	9	1	0.73	1338	0.53376	0.53376
GO:0040015	negative regulation of multicellular organism growth	9	1	0.73	1339	0.53376	0.53376
GO:0045003	double-strand break repair via synthesis-dependent strand annealing	9	1	0.73	1340	0.53376	0.53376
GO:0046845	branched duct epithelial cell fate determination, open tracheal system	9	1	0.73	1341	0.53376	0.53376
GO:0048140	male germ-line cyst encapsulation	9	1	0.73	1342	0.53376	0.53376
GO:0048753	pigment granule organization	9	1	0.73	1343	0.53376	0.53376
GO:0050686	negative regulation of mRNA processing	9	1	0.73	1344	0.53376	0.53376
GO:0060232	delamination	9	1	0.73	1345	0.53376	0.53376
GO:0060361	flight	9	1	0.73	1346	0.53376	0.53376
GO:0070278	extracellular matrix constituent secretion	9	1	0.73	1347	0.53376	0.53376
GO:0090136	epithelial cell-cell adhesion	9	1	0.73	1348	0.53376	0.53376
GO:1902358	sulfate transmembrane transport	9	1	0.73	1349	0.53376	0.53376
GO:0045861	negative regulation of proteolysis	32	2	2.6	1846	0.74623	0.5343
GO:0007626	locomotory behavior	144	10	11.7	1842	0.74361	0.53501
GO:0016458	gene silencing	165	5	13.41	2617	0.99809	0.53928
GO:0007017	microtubule-based process	322	13	26.16	2650	0.99905	0.54248
GO:0007219	Notch signaling pathway	117	9	9.51	1565	0.61824	0.54441
GO:0045165	cell fate commitment	261	36	21.2	65	0.00107	0.56192
GO:0001752	compound eye photoreceptor fate commitment	45	6	3.66	559	0.15482	0.56615
GO:0007350	blastoderm segmentation	169	22	13.73	194	0.01801	0.56638
GO:0048646	anatomical structure formation involved in morphogenesis	440	41	35.75	624	0.19442	0.56825
GO:0033227	dsRNA transport	23	2	1.87	1412	0.56826	0.56826
GO:0051302	regulation of cell division	23	2	1.87	1413	0.56826	0.56826
GO:0046777	protein autophosphorylation	37	3	3.01	1477	0.58826	0.56839
GO:0048871	multicellular organismal homeostasis	54	9	4.39	244	0.02847	0.56883
GO:0045746	negative regulation of Notch signaling pathway	36	3	2.92	1424	0.56927	0.56927
GO:0006821	chloride transport	33	5	2.68	508	0.12536	0.57032
GO:0048542	lymph gland development	46	5	3.74	784	0.31743	0.57099
GO:0000302	response to reactive oxygen species	22	3	1.79	721	0.26323	0.57103
GO:0033692	cellular polysaccharide biosynthetic process	16	2	1.3	928	0.37765	0.57136
GO:0000726	non-recombinational repair	10	1	0.81	1425	0.57168	0.57168
GO:0003384	apical constriction involved in gastrulation	10	1	0.81	1426	0.57168	0.57168
GO:0006084	acetyl-CoA metabolic process	10	1	0.81	1427	0.57168	0.57168
GO:0007026	negative regulation of microtubule depolymerization	10	1	0.81	1428	0.57168	0.57168
GO:0007096	regulation of exit from mitosis	10	1	0.81	1429	0.57168	0.57168
GO:0007436	larval salivary gland morphogenesis	10	1	0.81	1430	0.57168	0.57168
GO:0007488	histoblast morphogenesis	10	1	0.81	1431	0.57168	0.57168
GO:0017001	antibiotic catabolic process	10	1	0.81	1432	0.57168	0.57168
GO:0018243	protein O-linked glycosylation via threonine	10	1	0.81	1433	0.57168	0.57168
GO:0030322	stabilization of membrane potential	10	1	0.81	1434	0.57168	0.57168
GO:0030708	germarium-derived female germ-line cyst encapsulation	10	1	0.81	1435	0.57168	0.57168
GO:0030723	ovarian fusome organization	10	1	0.81	1436	0.57168	0.57168
GO:0035158	regulation of tube diameter, open tracheal system	10	1	0.81	1437	0.57168	0.57168
GO:0040020	regulation of meiotic nuclear division	10	1	0.81	1438	0.57168	0.57168
GO:0042246	tissue regeneration	10	1	0.81	1439	0.57168	0.57168
GO:0043113	receptor clustering	10	1	0.81	1440	0.57168	0.57168
GO:0045742	positive regulation of epidermal growth factor receptor signaling pathway	10	1	0.81	1441	0.57168	0.57168
GO:0048082	regulation of adult chitin-containing cuticle pigmentation	10	1	0.81	1442	0.57168	0.57168
GO:0048747	muscle fiber development	10	1	0.81	1443	0.57168	0.57168
GO:0050775	positive regulation of dendrite morphogenesis	10	1	0.81	1444	0.57168	0.57168
GO:0061723	glycophagy	10	1	0.81	1445	0.57168	0.57168
GO:0071230	cellular response to amino acid stimulus	10	1	0.81	1446	0.57168	0.57168
GO:1905881	positive regulation of oogenesis	10	1	0.81	1447	0.57168	0.57168
GO:2000737	negative regulation of stem cell differentiation	10	1	0.81	1448	0.57168	0.57168
GO:0009620	response to fungus	49	3	3.98	1905	0.77239	0.57243
GO:0045860	positive regulation of protein kinase activity	54	3	4.39	2014	0.82631	0.5727
GO:0001934	positive regulation of protein phosphorylation	132	9	10.72	1859	0.75599	0.57293
GO:0042325	regulation of phosphorylation	231	16	18.77	1943	0.78472	0.57363
GO:0030031	cell projection assembly	101	5	8.21	2254	0.9219	0.57388
GO:0000910	cytokinesis	94	4	7.64	2355	0.95369	0.57415
GO:0050803	regulation of synapse structure or activity	145	7	11.78	2362	0.95643	0.57491
GO:0006260	DNA replication	99	3	8.04	2516	0.98952	0.57506
GO:0044249	cellular biosynthetic process	1954	149	158.75	2054	0.83936	0.58035
GO:0006796	phosphate-containing compound metabolic process	815	49	66.21	2543	0.99364	0.58405
GO:0043065	positive regulation of apoptotic process	50	4	4.06	1475	0.58795	0.58795
GO:0042078	germ-line stem cell division	37	3	3.01	1478	0.58826	0.58826
GO:0016319	mushroom body development	63	5	5.12	1484	0.58898	0.58898
GO:0036099	female germ-line stem cell population maintenance	24	2	1.95	1487	0.59184	0.59184
GO:0036335	intestinal stem cell homeostasis	24	2	1.95	1488	0.59184	0.59184
GO:0046329	negative regulation of JNK cascade	24	2	1.95	1489	0.59184	0.59184
GO:0071456	cellular response to hypoxia	24	2	1.95	1490	0.59184	0.59184
GO:0050877	nervous system process	365	23	29.65	2262	0.92431	0.59852
GO:0044550	secondary metabolite biosynthetic process	26	4	2.11	566	0.15594	0.60538
GO:0007517	muscle organ development	76	8	6.17	729	0.27455	0.60541
GO:0034613	cellular protein localization	440	22	35.75	2579	0.99672	0.60565
GO:0098656	anion transmembrane transport	70	7	5.69	806	0.341	0.60575
GO:0051054	positive regulation of DNA metabolic process	20	2	1.62	1212	0.49179	0.60636
GO:0016051	carbohydrate biosynthetic process	47	4	3.82	1382	0.53788	0.60648
GO:0006760	folic acid-containing compound metabolic process	11	1	0.89	1500	0.60653	0.60653
GO:0006964	positive regulation of biosynthetic process of antibacterial peptides active against Gram-negative b...	11	1	0.89	1501	0.60653	0.60653
GO:0007110	meiosis I cytokinesis	11	1	0.89	1502	0.60653	0.60653
GO:0007200	phospholipase C-activating G-protein coupled receptor signaling pathway	11	1	0.89	1503	0.60653	0.60653
GO:0007394	dorsal closure, elongation of leading edge cells	11	1	0.89	1504	0.60653	0.60653
GO:0007412	axon target recognition	11	1	0.89	1505	0.60653	0.60653
GO:0007428	primary branching, open tracheal system	11	1	0.89	1506	0.60653	0.60653
GO:0007584	response to nutrient	11	1	0.89	1507	0.60653	0.60653
GO:0010043	response to zinc ion	11	1	0.89	1508	0.60653	0.60653
GO:0015701	bicarbonate transport	11	1	0.89	1509	0.60653	0.60653
GO:0016973	poly(A)+ mRNA export from nucleus	11	1	0.89	1510	0.60653	0.60653
GO:0030837	negative regulation of actin filament polymerization	11	1	0.89	1511	0.60653	0.60653
GO:0031440	regulation of mRNA 3'-end processing	11	1	0.89	1512	0.60653	0.60653
GO:0033619	membrane protein proteolysis	11	1	0.89	1513	0.60653	0.60653
GO:0035290	trunk segmentation	11	1	0.89	1514	0.60653	0.60653
GO:0035332	positive regulation of hippo signaling	11	1	0.89	1515	0.60653	0.60653
GO:0042417	dopamine metabolic process	11	1	0.89	1516	0.60653	0.60653
GO:0042559	pteridine-containing compound biosynthetic process	11	1	0.89	1517	0.60653	0.60653
GO:0046426	negative regulation of JAK-STAT cascade	11	1	0.89	1518	0.60653	0.60653
GO:0060025	regulation of synaptic activity	11	1	0.89	1519	0.60653	0.60653
GO:0060964	regulation of gene silencing by miRNA	11	1	0.89	1520	0.60653	0.60653
GO:0061343	cell adhesion involved in heart morphogenesis	11	1	0.89	1521	0.60653	0.60653
GO:0090303	positive regulation of wound healing	11	1	0.89	1522	0.60653	0.60653
GO:0097501	stress response to metal ion	11	1	0.89	1523	0.60653	0.60653
GO:2000765	regulation of cytoplasmic translation	11	1	0.89	1524	0.60653	0.60653
GO:0010389	regulation of G2/M transition of mitotic cell cycle	28	2	2.27	1694	0.67645	0.60678
GO:0006605	protein targeting	84	6	6.82	1714	0.68811	0.60714
GO:0032870	cellular response to hormone stimulus	84	6	6.82	1715	0.68811	0.60714
GO:0007315	pole plasm assembly	61	4	4.96	1822	0.74169	0.60722
GO:0031098	stress-activated protein kinase signaling cascade	79	5	6.42	1917	0.7803	0.60752
GO:0006816	calcium ion transport	48	2	3.9	2223	0.91091	0.60783
GO:0016571	histone methylation	61	2	4.96	2395	0.96414	0.60852
GO:0006955	immune response	246	15	19.99	2219	0.90806	0.60992
GO:0098655	cation transmembrane transport	138	6	11.21	2440	0.97298	0.61002
GO:0006869	lipid transport	58	8	4.71	437	0.09524	0.61126
GO:1901606	alpha-amino acid catabolic process	37	3	3.01	1479	0.58826	0.61441
GO:0007317	regulation of pole plasm oskar mRNA localization	25	2	2.03	1546	0.61444	0.61444
GO:0045887	positive regulation of synaptic growth at neuromuscular junction	25	2	2.03	1547	0.61444	0.61444
GO:0050830	defense response to Gram-positive bacterium	25	2	2.03	1548	0.61444	0.61444
GO:0007018	microtubule-based movement	88	6	7.15	1808	0.73069	0.61551
GO:0010468	regulation of gene expression	1188	73	96.52	2611	0.99796	0.61805
GO:0007507	heart development	88	11	7.15	440	0.09899	0.63227
GO:0072002	Malpighian tubule development	52	9	4.22	227	0.02274	0.63544
GO:0030010	establishment of cell polarity	48	4	3.9	1404	0.55491	0.63587
GO:0006378	mRNA polyadenylation	26	2	2.11	1575	0.63607	0.63607
GO:0048675	axon extension	46	3	3.74	1811	0.7339	0.63666
GO:0010035	response to inorganic substance	45	6	3.66	560	0.15482	0.63704
GO:1901607	alpha-amino acid biosynthetic process	37	5	3.01	593	0.17794	0.63726
GO:0051050	positive regulation of transport	88	9	7.15	732	0.28484	0.63735
GO:1903532	positive regulation of secretion by cell	23	3	1.87	746	0.28601	0.63783
GO:0019722	calcium-mediated signaling	17	2	1.38	1030	0.40732	0.63816
GO:0045665	negative regulation of neuron differentiation	19	2	1.54	1186	0.46446	0.63827
GO:0007297	ovarian follicle cell migration	118	10	9.59	1286	0.4932	0.63829
GO:0006936	muscle contraction	23	2	1.87	1414	0.56826	0.63848
GO:0006623	protein targeting to vacuole	12	1	0.97	1581	0.63854	0.63854
GO:0006835	dicarboxylic acid transport	12	1	0.97	1582	0.63854	0.63854
GO:0006998	nuclear envelope organization	12	1	0.97	1583	0.63854	0.63854
GO:0007032	endosome organization	12	1	0.97	1584	0.63854	0.63854
GO:0007035	vacuolar acidification	12	1	0.97	1585	0.63854	0.63854
GO:0008069	dorsal/ventral axis specification, ovarian follicular epithelium	12	1	0.97	1586	0.63854	0.63854
GO:0009047	dosage compensation by hyperactivation of X chromosome	12	1	0.97	1587	0.63854	0.63854
GO:0009065	glutamine family amino acid catabolic process	12	1	0.97	1588	0.63854	0.63854
GO:0018023	peptidyl-lysine trimethylation	12	1	0.97	1589	0.63854	0.63854
GO:0018107	peptidyl-threonine phosphorylation	12	1	0.97	1590	0.63854	0.63854
GO:0035725	sodium ion transmembrane transport	12	1	0.97	1591	0.63854	0.63854
GO:0043001	Golgi to plasma membrane protein transport	12	1	0.97	1592	0.63854	0.63854
GO:0045175	basal protein localization	12	1	0.97	1593	0.63854	0.63854
GO:0046835	carbohydrate phosphorylation	12	1	0.97	1594	0.63854	0.63854
GO:0050962	detection of light stimulus involved in sensory perception	12	1	0.97	1595	0.63854	0.63854
GO:0050975	sensory perception of touch	12	1	0.97	1596	0.63854	0.63854
GO:0062013	positive regulation of small molecule metabolic process	12	1	0.97	1597	0.63854	0.63854
GO:1905515	non-motile cilium assembly	12	1	0.97	1598	0.63854	0.63854
GO:0048639	positive regulation of developmental growth	70	5	5.69	1710	0.68265	0.63901
GO:0008344	adult locomotory behavior	64	6	5.2	1049	0.42052	0.6479
GO:0008593	regulation of Notch signaling pathway	95	7	7.72	1644	0.66201	0.65724
GO:0016579	protein deubiquitination	41	3	3.33	1640	0.65868	0.65868
GO:0008033	tRNA processing	71	11	5.77	242	0.02706	0.66451
GO:0035214	eye-antennal disc development	51	9	4.14	204	0.0202	0.66477
GO:0000245	spliceosomal complex assembly	21	3	1.71	683	0.2407	0.66709
GO:0006469	negative regulation of protein kinase activity	25	3	2.03	799	0.33192	0.6673
GO:0007189	adenylate cyclase-activating G-protein coupled receptor signaling pathway	18	2	1.46	1071	0.43628	0.66758
GO:0045610	regulation of hemocyte differentiation	23	2	1.87	1415	0.56826	0.66784
GO:0002237	response to molecule of bacterial origin	13	1	1.06	1647	0.66796	0.66796
GO:0006536	glutamate metabolic process	13	1	1.06	1648	0.66796	0.66796
GO:0030308	negative regulation of cell growth	13	1	1.06	1649	0.66796	0.66796
GO:0030720	oocyte localization involved in germarium-derived egg chamber formation	13	1	1.06	1650	0.66796	0.66796
GO:0031145	anaphase-promoting complex-dependent catabolic process	13	1	1.06	1651	0.66796	0.66796
GO:0031644	regulation of neurological system process	13	1	1.06	1652	0.66796	0.66796
GO:0045773	positive regulation of axon extension	13	1	1.06	1653	0.66796	0.66796
GO:0046427	positive regulation of JAK-STAT cascade	13	1	1.06	1654	0.66796	0.66796
GO:0046627	negative regulation of insulin receptor signaling pathway	13	1	1.06	1655	0.66796	0.66796
GO:0055092	sterol homeostasis	13	1	1.06	1656	0.66796	0.66796
GO:0043401	steroid hormone mediated signaling pathway	27	2	2.19	1627	0.65673	0.66805
GO:0008286	insulin receptor signaling pathway	34	2	2.76	1912	0.77601	0.66842
GO:0009617	response to bacterium	170	13	13.81	1572	0.6327	0.66846
GO:0010948	negative regulation of cell cycle process	60	3	4.87	2130	0.87624	0.66914
GO:0007608	sensory perception of smell	42	3	3.41	1685	0.67486	0.67486
GO:0035206	regulation of hemocyte proliferation	34	4	2.76	756	0.29709	0.67504
GO:0006414	translational elongation	28	2	2.27	1695	0.67645	0.67645
GO:0090263	positive regulation of canonical Wnt signaling pathway	28	2	2.27	1696	0.67645	0.67645
GO:0055088	lipid homeostasis	63	4	5.12	1899	0.76436	0.67724
GO:0007591	molting cycle, chitin-based cuticle	81	14	6.58	112	0.00522	0.69009
GO:0007631	feeding behavior	33	6	2.68	302	0.0471	0.69277
GO:0007163	establishment or maintenance of cell polarity	185	18	15.03	690	0.24411	0.69296
GO:0010628	positive regulation of gene expression	373	32	30.3	1016	0.39911	0.69329
GO:0001933	negative regulation of protein phosphorylation	62	6	5.04	947	0.3907	0.69428
GO:0015718	monocarboxylic acid transport	22	2	1.79	1385	0.54372	0.69476
GO:0008594	photoreceptor cell morphogenesis	14	1	1.14	1722	0.69498	0.69498
GO:0016059	deactivation of rhodopsin mediated signaling	14	1	1.14	1723	0.69498	0.69498
GO:0016081	synaptic vesicle docking	14	1	1.14	1724	0.69498	0.69498
GO:0030422	production of siRNA involved in RNA interference	14	1	1.14	1725	0.69498	0.69498
GO:0030518	intracellular steroid hormone receptor signaling pathway	14	1	1.14	1726	0.69498	0.69498
GO:0038083	peptidyl-tyrosine autophosphorylation	14	1	1.14	1727	0.69498	0.69498
GO:0044804	autophagy of nucleus	14	1	1.14	1728	0.69498	0.69498
GO:0050878	regulation of body fluid levels	14	1	1.14	1729	0.69498	0.69498
GO:2000134	negative regulation of G1/S transition of mitotic cell cycle	14	1	1.14	1730	0.69498	0.69498
GO:0000723	telomere maintenance	29	2	2.36	1747	0.69524	0.69524
GO:0016321	female meiosis chromosome segregation	29	2	2.36	1748	0.69524	0.69524
GO:0032147	activation of protein kinase activity	29	2	2.36	1749	0.69524	0.69524
GO:0022603	regulation of anatomical structure morphogenesis	198	15	16.09	1626	0.6513	0.69561
GO:0007254	JNK cascade	65	4	5.28	1946	0.78545	0.69572
GO:0008152	metabolic process	4473	359	363.4	1646	0.6677	0.69808
GO:0006914	autophagy	140	4	11.37	2602	0.99737	0.69965
GO:0042593	glucose homeostasis	30	2	2.44	1768	0.71311	0.71311
GO:0007528	neuromuscular junction development	150	7	12.19	2401	0.96584	0.71746
GO:0006486	protein glycosylation	80	8	6.5	790	0.32342	0.71872
GO:0006814	sodium ion transport	27	2	2.19	1628	0.65673	0.7198
GO:0006282	regulation of DNA repair	15	1	1.22	1779	0.71981	0.71981
GO:0006730	one-carbon metabolic process	15	1	1.22	1780	0.71981	0.71981
GO:0016063	rhodopsin biosynthetic process	15	1	1.22	1781	0.71981	0.71981
GO:0051091	positive regulation of DNA binding transcription factor activity	15	1	1.22	1782	0.71981	0.71981
GO:0060857	establishment of glial blood-brain barrier	15	1	1.22	1783	0.71981	0.71981
GO:0018108	peptidyl-tyrosine phosphorylation	29	2	2.36	1750	0.69524	0.7199
GO:0022416	chaeta development	60	5	4.87	1395	0.54454	0.72953
GO:0045727	positive regulation of translation	31	2	2.52	1799	0.7301	0.7301
GO:0007424	open tracheal system development	200	31	16.25	37	0.00032	0.73229
GO:0070374	positive regulation of ERK1 and ERK2 cascade	46	3	3.74	1812	0.7339	0.7339
GO:0007166	cell surface receptor signaling pathway	565	55	45.9	434	0.08641	0.73995
GO:0019233	sensory perception of pain	61	4	4.96	1823	0.74169	0.74169
GO:0003014	renal system process	22	2	1.79	1386	0.54372	0.74231
GO:0030097	hemopoiesis	72	6	5.85	1379	0.53646	0.74235
GO:0000132	establishment of mitotic spindle orientation	16	1	1.3	1829	0.74262	0.74262
GO:0002218	activation of innate immune response	16	1	1.3	1830	0.74262	0.74262
GO:0007370	ventral furrow formation	16	1	1.3	1831	0.74262	0.74262
GO:0009072	aromatic amino acid family metabolic process	16	1	1.3	1832	0.74262	0.74262
GO:0045196	establishment or maintenance of neuroblast polarity	16	1	1.3	1833	0.74262	0.74262
GO:0090175	regulation of establishment of planar polarity	16	1	1.3	1834	0.74262	0.74262
GO:0016246	RNA interference	30	2	2.44	1769	0.71311	0.74271
GO:0051453	regulation of intracellular pH	32	2	2.6	1847	0.74623	0.74281
GO:0008298	intracellular mRNA localization	77	4	6.26	2143	0.88208	0.74384
GO:0045214	sarcomere organization	32	2	2.6	1848	0.74623	0.74623
GO:0006397	mRNA processing	278	11	22.59	2623	0.99843	0.74974
GO:0030162	regulation of proteolysis	105	5	8.53	2297	0.93639	0.75016
GO:0030261	chromosome condensation	48	3	3.9	1863	0.76009	0.76009
GO:0048149	behavioral response to ethanol	48	3	3.9	1864	0.76009	0.76009
GO:0007030	Golgi organization	77	5	6.26	1868	0.76084	0.76084
GO:0006909	phagocytosis	50	3	4.06	1938	0.78416	0.76185
GO:0051241	negative regulation of multicellular organismal process	159	11	12.92	1857	0.75483	0.7626
GO:0007173	epidermal growth factor receptor signaling pathway	63	6	5.12	1020	0.40562	0.76282
GO:0048814	regulation of dendrite morphogenesis	27	2	2.19	1629	0.65673	0.76347
GO:0097190	apoptotic signaling pathway	40	3	3.25	1617	0.64193	0.7635
GO:0000079	regulation of cyclin-dependent protein serine/threonine kinase activity	17	1	1.38	1878	0.76358	0.76358
GO:0006308	DNA catabolic process	17	1	1.38	1879	0.76358	0.76358
GO:0007041	lysosomal transport	17	1	1.38	1880	0.76358	0.76358
GO:0007179	transforming growth factor beta receptor signaling pathway	17	1	1.38	1881	0.76358	0.76358
GO:0009312	oligosaccharide biosynthetic process	17	1	1.38	1882	0.76358	0.76358
GO:0035019	somatic stem cell population maintenance	17	1	1.38	1883	0.76358	0.76358
GO:0043248	proteasome assembly	17	1	1.38	1884	0.76358	0.76358
GO:0043277	apoptotic cell clearance	17	1	1.38	1885	0.76358	0.76358
GO:0032386	regulation of intracellular transport	47	2	3.82	2205	0.90463	0.76444
GO:1901136	carbohydrate derivative catabolic process	62	11	5.04	161	0.01039	0.77903
GO:0007281	germ cell development	621	52	50.45	1056	0.42931	0.78159
GO:0006006	glucose metabolic process	29	2	2.36	1751	0.69524	0.78277
GO:0006383	transcription by RNA polymerase III	18	1	1.46	1920	0.78283	0.78283
GO:0007031	peroxisome organization	18	1	1.46	1921	0.78283	0.78283
GO:0007475	apposition of dorsal and ventral imaginal disc-derived wing surfaces	18	1	1.46	1922	0.78283	0.78283
GO:0030433	ubiquitin-dependent ERAD pathway	18	1	1.46	1923	0.78283	0.78283
GO:0031507	heterochromatin assembly	18	1	1.46	1924	0.78283	0.78283
GO:0031937	positive regulation of chromatin silencing	18	1	1.46	1925	0.78283	0.78283
GO:0044719	regulation of imaginal disc-derived wing size	18	1	1.46	1926	0.78283	0.78283
GO:0048678	response to axon injury	18	1	1.46	1927	0.78283	0.78283
GO:0031647	regulation of protein stability	48	2	3.9	2224	0.91091	0.78367
GO:0007616	long-term memory	65	4	5.28	1947	0.78545	0.78545
GO:0019991	septate junction assembly	35	2	2.84	1948	0.78972	0.78972
GO:0045747	positive regulation of Notch signaling pathway	35	2	2.84	1949	0.78972	0.78972
GO:0009152	purine ribonucleotide biosynthetic process	73	4	5.93	2080	0.85512	0.79061
GO:0045892	negative regulation of transcription, DNA-templated	277	20	22.5	1843	0.74461	0.79681
GO:0031328	positive regulation of cellular biosynthetic process	385	34	31.28	794	0.32811	0.79859
GO:0008063	Toll signaling pathway	40	3	3.25	1618	0.64193	0.80035
GO:0000387	spliceosomal snRNP assembly	19	1	1.54	1963	0.80052	0.80052
GO:0043523	regulation of neuron apoptotic process	19	1	1.54	1964	0.80052	0.80052
GO:1903829	positive regulation of cellular protein localization	19	1	1.54	1965	0.80052	0.80052
GO:0007088	regulation of mitotic nuclear division	61	4	4.96	1824	0.74169	0.80076
GO:0006396	RNA processing	524	40	42.57	1716	0.68967	0.80178
GO:0034332	adherens junction organization	36	2	2.92	1974	0.80269	0.80269
GO:2000647	negative regulation of stem cell proliferation	36	2	2.92	1975	0.80269	0.80269
GO:0048813	dendrite morphogenesis	131	12	10.64	921	0.37579	0.80353
GO:0007346	regulation of mitotic cell cycle	172	9	13.97	2331	0.94668	0.80593
GO:0018130	heterocycle biosynthetic process	1147	72	93.19	2560	0.99565	0.81397
GO:0030100	regulation of endocytosis	52	5	4.22	1047	0.41685	0.816
GO:0034599	cellular response to oxidative stress	32	3	2.6	1207	0.48819	0.81621
GO:0043901	negative regulation of multi-organism process	26	2	2.11	1576	0.63607	0.81649
GO:0007131	reciprocal meiotic recombination	27	2	2.19	1630	0.65673	0.81653
GO:0000915	actomyosin contractile ring assembly	20	1	1.62	2002	0.81677	0.81677
GO:0045879	negative regulation of smoothened signaling pathway	20	1	1.62	2003	0.81677	0.81677
GO:0007269	neurotransmitter secretion	80	3	6.5	2386	0.96342	0.81835
GO:0045087	innate immune response	164	9	13.32	2263	0.92529	0.81858
GO:0050829	defense response to Gram-negative bacterium	82	5	6.66	1984	0.80718	0.82316
GO:0007446	imaginal disc growth	38	2	3.09	2018	0.82652	0.82652
GO:0031146	SCF-dependent proteasomal ubiquitin-dependent protein catabolic process	38	2	3.09	2019	0.82652	0.82652
GO:0006325	chromatin organization	327	7	26.57	2719	1	0.82731
GO:0051604	protein maturation	80	12	6.5	243	0.02708	0.82836
GO:0006950	response to stress	956	58	77.67	2565	0.99591	0.82842
GO:0090305	nucleic acid phosphodiester bond hydrolysis	69	6	5.61	1288	0.49392	0.83111
GO:0051607	defense response to virus	38	3	3.09	1542	0.60671	0.83137
GO:0045197	establishment or maintenance of epithelial cell apical/basal polarity	27	2	2.19	1631	0.65673	0.83142
GO:0031532	actin cytoskeleton reorganization	28	2	2.27	1697	0.67645	0.83147
GO:0010507	negative regulation of autophagy	21	1	1.71	2027	0.8317	0.8317
GO:0040018	positive regulation of multicellular organism growth	21	1	1.71	2028	0.8317	0.8317
GO:0044106	cellular amine metabolic process	21	1	1.71	2029	0.8317	0.8317
GO:0046330	positive regulation of JNK cascade	21	1	1.71	2030	0.8317	0.8317
GO:0046928	regulation of neurotransmitter secretion	21	1	1.71	2031	0.8317	0.8317
GO:0045451	pole plasm oskar mRNA localization	46	3	3.74	1813	0.7339	0.83171
GO:0046578	regulation of Ras protein signal transduction	122	8	9.91	1944	0.78535	0.83235
GO:0042752	regulation of circadian rhythm	62	3	5.04	2165	0.88981	0.8324
GO:0009306	protein secretion	66	7	5.36	751	0.28755	0.8354
GO:0032504	multicellular organism reproduction	898	68	72.96	1861	0.75958	0.83544
GO:0050768	negative regulation of neurogenesis	58	4	4.71	1761	0.70464	0.8371
GO:0050832	defense response to fungus	39	2	3.17	2044	0.83743	0.83743
GO:0001666	response to hypoxia	46	3	3.74	1814	0.7339	0.84538
GO:0007632	visual behavior	22	1	1.79	2060	0.84541	0.84541
GO:0010951	negative regulation of endopeptidase activity	22	1	1.79	2061	0.84541	0.84541
GO:0006749	glutathione metabolic process	40	2	3.25	2069	0.84772	0.84772
GO:0018105	peptidyl-serine phosphorylation	40	2	3.25	2070	0.84772	0.84772
GO:0043547	positive regulation of GTPase activity	57	3	4.63	2079	0.85311	0.85311
GO:0007423	sensory organ development	383	36	31.12	630	0.19778	0.85505
GO:0008049	male courtship behavior	41	2	3.33	2084	0.85741	0.85741
GO:0045886	negative regulation of synaptic growth at neuromuscular junction	41	2	3.33	2085	0.85741	0.85741
GO:0048190	wing disc dorsal/ventral pattern formation	41	2	3.33	2086	0.85741	0.85741
GO:0008345	larval locomotory behavior	23	1	1.87	2092	0.85801	0.85801
GO:0035096	larval midgut cell programmed cell death	23	1	1.87	2093	0.85801	0.85801
GO:0045187	regulation of circadian sleep/wake cycle, sleep	23	1	1.87	2094	0.85801	0.85801
GO:0070328	triglyceride homeostasis	23	1	1.87	2095	0.85801	0.85801
GO:0042391	regulation of membrane potential	78	5	6.34	1903	0.77073	0.86857
GO:0045475	locomotor rhythm	59	3	4.79	2116	0.86892	0.86892
GO:0007526	larval somatic muscle development	24	1	1.95	2119	0.86958	0.86958
GO:0072384	organelle transport along microtubule	24	1	1.95	2120	0.86958	0.86958
GO:0030866	cortical actin cytoskeleton organization	51	2	4.14	2273	0.92751	0.87014
GO:0006888	ER to Golgi vesicle-mediated transport	60	3	4.87	2131	0.87624	0.87624
GO:0008361	regulation of cell size	86	5	6.99	2050	0.83887	0.87633
GO:0006635	fatty acid beta-oxidation	32	2	2.6	1849	0.74623	0.88002
GO:0031325	positive regulation of cellular metabolic process	609	43	49.48	2106	0.86098	0.88287
GO:0016192	vesicle-mediated transport	465	20	37.78	2678	0.99974	0.88551
GO:0030154	cell differentiation	1361	116	110.57	754	0.29161	0.8866
GO:0006511	ubiquitin-dependent protein catabolic process	203	7	16.49	2616	0.99808	0.88797
GO:0006979	response to oxidative stress	103	7	8.37	1826	0.74245	0.88935
GO:0035071	salivary gland cell autophagic cell death	26	1	2.11	2166	0.88998	0.88998
GO:0015711	organic anion transport	127	9	10.32	1776	0.71433	0.89007
GO:0042594	response to starvation	109	8	8.86	1680	0.67014	0.89034
GO:0006302	double-strand break repair	69	3	5.61	2269	0.92741	0.89062
GO:0040008	regulation of growth	261	18	21.2	1973	0.80153	0.89091
GO:0009314	response to radiation	168	8	13.65	2418	0.96868	0.89194
GO:0043066	negative regulation of apoptotic process	89	6	7.23	1820	0.74066	0.89294
GO:0044087	regulation of cellular component biogenesis	269	10	21.85	2643	0.99901	0.89464
GO:0008284	positive regulation of cell proliferation	58	6	4.71	797	0.33113	0.89625
GO:0007306	eggshell chorion assembly	71	7	5.77	900	0.35458	0.89795
GO:0000422	autophagy of mitochondrion	27	1	2.19	2188	0.89895	0.89895
GO:0034605	cellular response to heat	27	1	2.19	2189	0.89895	0.89895
GO:0043252	sodium-independent organic anion transport	27	1	2.19	2190	0.89895	0.89895
GO:0030307	positive regulation of cell growth	40	2	3.25	2071	0.84772	0.89897
GO:0009266	response to temperature stimulus	105	5	8.53	2298	0.93639	0.89991
GO:0051124	synaptic growth at neuromuscular junction	118	5	9.59	2417	0.9683	0.90034
GO:0007349	cellularization	81	3	6.58	2400	0.96569	0.90556
GO:0035556	intracellular signal transduction	572	30	46.47	2609	0.99781	0.90656
GO:0071805	potassium ion transmembrane transport	40	3	3.25	1619	0.64193	0.90679
GO:0000462	maturation of SSU-rRNA from tricistronic rRNA transcript (SSU-rRNA, 5.8S rRNA, LSU-rRNA)	33	2	2.68	1870	0.76152	0.90696
GO:0007112	male meiosis cytokinesis	28	1	2.27	2213	0.90719	0.90719
GO:0045454	cell redox homeostasis	28	1	2.27	2214	0.90719	0.90719
GO:0009636	response to toxic substance	122	8	9.91	1945	0.78535	0.90744
GO:0033993	response to lipid	64	3	5.2	2200	0.90203	0.90755
GO:0045893	positive regulation of transcription, DNA-templated	313	28	25.43	787	0.32293	0.91066
GO:0007275	multicellular organism development	1822	182	148.03	51	0.00057	0.91081
GO:1901701	cellular response to oxygen-containing compound	99	9	8.04	1045	0.41361	0.91389
GO:0042742	defense response to bacterium	149	12	12.11	1407	0.55699	0.91429
GO:0000724	double-strand break repair via homologous recombination	38	2	3.09	2020	0.82652	0.91466
GO:0006626	protein targeting to mitochondrion	29	1	2.36	2229	0.91476	0.91476
GO:0080090	regulation of primary metabolic process	1461	81	118.7	2706	0.99999	0.91602
GO:0009967	positive regulation of signal transduction	292	17	23.72	2334	0.94843	0.9168
GO:0014070	response to organic cyclic compound	103	7	8.37	1827	0.74245	0.92169
GO:0000212	meiotic spindle organization	30	1	2.44	2244	0.92171	0.92171
GO:0006368	transcription elongation from RNA polymerase II promoter	30	1	2.44	2245	0.92171	0.92171
GO:0033108	mitochondrial respiratory chain complex assembly	30	1	2.44	2246	0.92171	0.92171
GO:0035023	regulation of Rho protein signal transduction	30	1	2.44	2247	0.92171	0.92171
GO:0050821	protein stabilization	30	1	2.44	2248	0.92171	0.92171
GO:1901362	organic cyclic compound biosynthetic process	1183	78	96.11	2503	0.9864	0.92189
GO:0006099	tricarboxylic acid cycle	31	1	2.52	2275	0.9281	0.9281
GO:0007097	nuclear migration	31	1	2.52	2276	0.9281	0.9281
GO:0007218	neuropeptide signaling pathway	31	1	2.52	2277	0.9281	0.9281
GO:0051489	regulation of filopodium assembly	31	1	2.52	2278	0.9281	0.9281
GO:0007399	nervous system development	904	87	73.44	299	0.04701	0.92836
GO:0031329	regulation of cellular catabolic process	148	3	12.02	2677	0.99968	0.93524
GO:0008104	protein localization	570	31	46.31	2566	0.99592	0.93851
GO:0000045	autophagosome assembly	33	1	2.68	2306	0.93935	0.93935
GO:0006355	regulation of transcription, DNA-templated	872	53	70.84	2544	0.99382	0.94011
GO:0007268	chemical synaptic transmission	234	8	19.01	2651	0.99907	0.94044
GO:0000281	mitotic cytokinesis	54	2	4.39	2313	0.94116	0.94116
GO:0050808	synapse organization	233	11	18.93	2497	0.98565	0.94126
GO:0006997	nucleus organization	54	3	4.39	2015	0.82631	0.9442
GO:0000077	DNA damage checkpoint	34	1	2.76	2316	0.9443	0.9443
GO:0007291	sperm individualization	34	1	2.76	2317	0.9443	0.9443
GO:0030716	oocyte fate determination	34	1	2.76	2318	0.9443	0.9443
GO:0030838	positive regulation of actin filament polymerization	34	1	2.76	2319	0.9443	0.9443
GO:0048193	Golgi vesicle transport	118	6	9.59	2265	0.92594	0.94483
GO:0000381	regulation of alternative mRNA splicing, via spliceosome	74	3	6.01	2328	0.94662	0.94662
GO:0007310	oocyte dorsal/ventral axis specification	40	3	3.25	1620	0.64193	0.94842
GO:0071902	positive regulation of protein serine/threonine kinase activity	35	1	2.84	2335	0.94885	0.94885
GO:0017148	negative regulation of translation	73	4	5.93	2081	0.85512	0.94887
GO:0046579	positive regulation of Ras protein signal transduction	57	2	4.63	2346	0.95235	0.95235
GO:0017144	drug metabolic process	275	22	22.34	1411	0.56398	0.95262
GO:0042052	rhabdomere development	36	1	2.92	2349	0.95302	0.95302
GO:0051259	protein complex oligomerization	36	1	2.92	2350	0.95302	0.95302
GO:0008356	asymmetric cell division	94	5	7.64	2164	0.88947	0.95321
GO:0006417	regulation of translation	144	8	11.7	2220	0.90831	0.95348
GO:0008285	negative regulation of cell proliferation	79	5	6.42	1918	0.7803	0.95672
GO:0007520	myoblast fusion	44	2	3.57	2148	0.88321	0.95676
GO:0051726	regulation of cell cycle	268	13	21.77	2508	0.98755	0.95851
GO:0007283	spermatogenesis	153	5	12.43	2567	0.99595	0.95992
GO:0008360	regulation of cell shape	61	4	4.96	1825	0.74169	0.96013
GO:0008355	olfactory learning	38	1	3.09	2374	0.96038	0.96038
GO:0006906	vesicle fusion	60	2	4.87	2380	0.96149	0.96149
GO:0030509	BMP signaling pathway	39	1	3.17	2388	0.96362	0.96362
GO:0032482	Rab protein signal transduction	39	1	3.17	2389	0.96362	0.96362
GO:0035317	imaginal disc-derived wing hair organization	39	1	3.17	2390	0.96362	0.96362
GO:0006418	tRNA aminoacylation for protein translation	40	1	3.25	2403	0.96659	0.96659
GO:0009408	response to heat	67	2	5.44	2453	0.97673	0.96683
GO:0000209	protein polyubiquitination	63	2	5.12	2419	0.96893	0.96893
GO:0061077	chaperone-mediated protein folding	41	1	3.33	2422	0.96932	0.96932
GO:0006839	mitochondrial transport	77	3	6.26	2357	0.95576	0.96949
GO:0007525	somatic muscle development	65	2	5.28	2441	0.9731	0.9695
GO:0006457	protein folding	112	4	9.1	2491	0.98417	0.97153
GO:0006470	protein dephosphorylation	84	3	6.82	2434	0.97171	0.97171
GO:0048488	synaptic vesicle endocytosis	42	1	3.41	2437	0.97183	0.97183
GO:0009416	response to light stimulus	127	7	10.32	2198	0.90058	0.97199
GO:0097305	response to alcohol	108	4	8.77	2470	0.97978	0.97451
GO:0007274	neuromuscular synaptic transmission	67	2	5.44	2454	0.97673	0.97673
GO:0009108	coenzyme biosynthetic process	73	4	5.93	2082	0.85512	0.97808
GO:0006897	endocytosis	181	11	14.71	2135	0.88005	0.98173
GO:0046620	regulation of organ growth	48	1	3.9	2484	0.98311	0.98311
GO:0016482	cytosolic transport	53	1	4.31	2513	0.98898	0.98898
GO:0045333	cellular respiration	96	2	7.8	2600	0.99733	0.98919
GO:0000226	microtubule cytoskeleton organization	263	9	21.37	2667	0.9995	0.99061
GO:0009968	negative regulation of signal transduction	260	19	21.12	1794	0.72141	0.99137
GO:0007293	germarium-derived egg chamber formation	89	3	7.23	2467	0.97958	0.99342
GO:0051225	spindle assembly	61	1	4.96	2550	0.99443	0.99443
GO:0016197	endosomal transport	87	2	7.07	2552	0.99472	0.99472
GO:0050804	modulation of chemical synaptic transmission	94	3	7.64	2494	0.98534	0.99533
GO:0000398	mRNA splicing, via spliceosome	226	7	18.36	2669	0.99952	0.99676
GO:0007052	mitotic spindle organization	68	1	5.52	2585	0.99694	0.99694
GO:0008654	phospholipid biosynthetic process	68	1	5.52	2586	0.99694	0.99694
GO:0006468	protein phosphorylation	370	22	30.06	2367	0.95764	0.99721
GO:0000278	mitotic cell cycle	419	12	34.04	2717	1	0.99747
GO:0016567	protein ubiquitination	154	4	12.51	2640	0.99897	0.99753
GO:0031023	microtubule organizing center organization	72	1	5.85	2610	0.99783	0.99783
GO:0006886	intracellular protein transport	310	12	25.19	2657	0.99928	0.999
GO:0061024	membrane organization	202	6	16.41	2664	0.99936	0.99905
GO:0006357	regulation of transcription by RNA polymerase II	530	39	43.06	1904	0.77161	0.99915
GO:0006338	chromatin remodeling	102	2	8.29	2620	0.99832	0.99923
GO:0018205	peptidyl-lysine modification	133	3	10.81	2648	0.99903	0.99941
GO:0043161	proteasome-mediated ubiquitin-dependent protein catabolic process	159	5	12.92	2597	0.99721	0.99955
GO:0016570	histone modification	172	3	13.97	2696	0.99995	0.99966
GO:0032543	mitochondrial translation	102	1	8.29	2687	0.99983	0.99983
GO:0000003	reproduction	994	82	80.76	1181	0.45802	1
GO:0000038	very long-chain fatty acid metabolic process	19	8	1.54	18	6.1e-05	1
GO:0000041	transition metal ion transport	29	2	2.36	1752	0.69524	1
GO:0000054	ribosomal subunit export from nucleus	11	1	0.89	1525	0.60653	1
GO:0000070	mitotic sister chromatid segregation	96	2	7.8	2601	0.99733	1
GO:0000075	cell cycle checkpoint	58	1	4.71	2539	0.99281	1
GO:0000076	DNA replication checkpoint	14	1	1.14	1731	0.69498	1
GO:0000082	G1/S transition of mitotic cell cycle	34	2	2.76	1913	0.77601	1
GO:0000096	sulfur amino acid metabolic process	19	2	1.54	1187	0.46446	1
GO:0000097	sulfur amino acid biosynthetic process	10	1	0.81	1449	0.57168	1
GO:0000165	MAPK cascade	149	10	12.11	1919	0.78057	1
GO:0000270	peptidoglycan metabolic process	9	1	0.73	1350	0.53376	1
GO:0000271	polysaccharide biosynthetic process	16	2	1.3	929	0.37765	1
GO:0000272	polysaccharide catabolic process	13	1	1.06	1657	0.66796	1
GO:0000280	nuclear division	262	7	21.29	2697	0.99995	1
GO:0000288	nuclear-transcribed mRNA catabolic process, deadenylation-dependent decay	27	2	2.19	1632	0.65673	1
GO:0000291	nuclear-transcribed mRNA catabolic process, exonucleolytic	10	2	0.81	617	0.19242	1
GO:0000375	RNA splicing, via transesterification reactions	226	7	18.36	2670	0.99952	1
GO:0000377	RNA splicing, via transesterification reactions with bulged adenosine as nucleophile	226	7	18.36	2671	0.99952	1
GO:0000380	alternative mRNA splicing, via spliceosome	74	3	6.01	2329	0.94662	1
GO:0000459	exonucleolytic trimming involved in rRNA processing	5	2	0.41	344	0.05586	1
GO:0000460	maturation of 5.8S rRNA	24	3	1.95	767	0.30894	1
GO:0000466	maturation of 5.8S rRNA from tricistronic rRNA transcript (SSU-rRNA, 5.8S rRNA, LSU-rRNA)	13	3	1.06	419	0.0827	1
GO:0000478	endonucleolytic cleavage involved in rRNA processing	10	1	0.81	1450	0.57168	1
GO:0000479	endonucleolytic cleavage of tricistronic rRNA transcript (SSU-rRNA, 5.8S rRNA, LSU-rRNA)	9	1	0.73	1351	0.53376	1
GO:0000578	embryonic axis specification	119	16	9.67	254	0.03064	1
GO:0000725	recombinational repair	38	2	3.09	2021	0.82652	1
GO:0000768	syncytium formation by plasma membrane fusion	44	2	3.57	2149	0.88321	1
GO:0000819	sister chromatid segregation	109	2	8.86	2645	0.99902	1
GO:0000904	cell morphogenesis involved in differentiation	386	48	31.36	79	0.00173	1
GO:0000912	assembly of actomyosin apparatus involved in cytokinesis	20	1	1.62	2004	0.81677	1
GO:0000956	nuclear-transcribed mRNA catabolic process	54	2	4.39	2314	0.94116	1
GO:0000959	mitochondrial RNA metabolic process	21	2	1.71	1308	0.51822	1
GO:0000963	mitochondrial RNA processing	7	2	0.57	469	0.10528	1
GO:0000966	RNA 5'-end processing	8	1	0.65	1258	0.49248	1
GO:0001101	response to acid chemical	15	2	1.22	880	0.34739	1
GO:0001505	regulation of neurotransmitter levels	110	3	8.94	2556	0.99507	1
GO:0001522	pseudouridine synthesis	14	1	1.14	1732	0.69498	1
GO:0001558	regulation of cell growth	68	3	5.52	2260	0.92287	1
GO:0001578	microtubule bundle formation	26	1	2.11	2167	0.88998	1
GO:0001655	urogenital system development	59	9	4.79	300	0.04707	1
GO:0001667	ameboidal-type cell migration	160	20	13	270	0.03433	1
GO:0001703	gastrulation with mouth forming first	29	1	2.36	2230	0.91476	1
GO:0001704	formation of primary germ layer	24	3	1.95	768	0.30894	1
GO:0001707	mesoderm formation	19	3	1.54	628	0.19678	1
GO:0001738	morphogenesis of a polarized epithelium	100	13	8.12	353	0.06035	1
GO:0001745	compound eye morphogenesis	247	21	20.07	1095	0.44706	1
GO:0001751	compound eye photoreceptor cell differentiation	140	14	11.37	692	0.24583	1
GO:0001754	eye photoreceptor cell differentiation	145	14	11.78	752	0.28859	1
GO:0001763	morphogenesis of a branching structure	50	7	4.06	479	0.10757	1
GO:0001775	cell activation	11	1	0.89	1526	0.60653	1
GO:0001895	retina homeostasis	17	2	1.38	1031	0.40732	1
GO:0001932	regulation of protein phosphorylation	213	15	17.3	1860	0.7572	1
GO:0001941	postsynaptic membrane organization	13	1	1.06	1658	0.66796	1
GO:0002009	morphogenesis of an epithelium	481	60	39.08	43	0.00043	1
GO:0002064	epithelial cell development	311	34	25.27	295	0.04464	1
GO:0002066	columnar/cuboidal epithelial cell development	283	32	22.99	268	0.03389	1
GO:0002097	tRNA wobble base modification	13	3	1.06	420	0.0827	1
GO:0002164	larval development	130	13	10.56	712	0.25644	1
GO:0002165	instar larval or pupal development	444	48	36.07	230	0.02343	1
GO:0002225	positive regulation of antimicrobial peptide production	25	2	2.03	1549	0.61444	1
GO:0002251	organ or tissue specific immune response	13	3	1.06	421	0.0827	1
GO:0002252	immune effector process	107	4	8.69	2463	0.97851	1
GO:0002253	activation of immune response	17	1	1.38	1886	0.76358	1
GO:0002440	production of molecular mediator of immune response	42	3	3.41	1686	0.67486	1
GO:0002520	immune system development	82	7	6.66	1296	0.5037	1
GO:0002683	negative regulation of immune system process	52	3	4.22	1981	0.80619	1
GO:0002697	regulation of immune effector process	52	3	4.22	1982	0.80619	1
GO:0002699	positive regulation of immune effector process	25	2	2.03	1550	0.61444	1
GO:0002700	regulation of production of molecular mediator of immune response	40	2	3.25	2072	0.84772	1
GO:0002702	positive regulation of production of molecular mediator of immune response	25	2	2.03	1551	0.61444	1
GO:0002759	regulation of antimicrobial humoral response	44	2	3.57	2150	0.88321	1
GO:0002760	positive regulation of antimicrobial humoral response	25	2	2.03	1552	0.61444	1
GO:0002777	antimicrobial peptide biosynthetic process	31	2	2.52	1800	0.7301	1
GO:0002778	antibacterial peptide production	18	2	1.46	1072	0.43628	1
GO:0002780	antibacterial peptide biosynthetic process	18	2	1.46	1073	0.43628	1
GO:0002784	regulation of antimicrobial peptide production	39	2	3.17	2045	0.83743	1
GO:0002786	regulation of antibacterial peptide production	18	2	1.46	1074	0.43628	1
GO:0002790	peptide secretion	72	9	5.85	513	0.12749	1
GO:0002791	regulation of peptide secretion	25	5	2.03	304	0.04744	1
GO:0002803	positive regulation of antibacterial peptide production	15	2	1.22	881	0.34739	1
GO:0002805	regulation of antimicrobial peptide biosynthetic process	31	2	2.52	1801	0.7301	1
GO:0002807	positive regulation of antimicrobial peptide biosynthetic process	21	2	1.71	1309	0.51822	1
GO:0002808	regulation of antibacterial peptide biosynthetic process	18	2	1.46	1075	0.43628	1
GO:0002812	biosynthetic process of antibacterial peptides active against Gram-negative bacteria	13	1	1.06	1659	0.66796	1
GO:0002813	regulation of biosynthetic process of antibacterial peptides active against Gram-negative bacteria	13	1	1.06	1660	0.66796	1
GO:0002831	regulation of response to biotic stimulus	64	3	5.2	2201	0.90203	1
GO:0002833	positive regulation of response to biotic stimulus	28	2	2.27	1698	0.67645	1
GO:0002920	regulation of humoral immune response	45	2	3.66	2171	0.8908	1
GO:0002922	positive regulation of humoral immune response	25	2	2.03	1553	0.61444	1
GO:0003002	regionalization	372	46	30.22	87	0.00241	1
GO:0003006	developmental process involved in reproduction	699	65	56.79	516	0.13158	1
GO:0003008	system process	450	34	36.56	1760	0.70175	1
GO:0003013	circulatory system process	38	7	3.09	263	0.03111	1
GO:0003381	epithelial cell morphogenesis involved in gastrulation	10	1	0.81	1451	0.57168	1
GO:0003382	epithelial cell morphogenesis	23	2	1.87	1416	0.56826	1
GO:0005976	polysaccharide metabolic process	35	4	2.84	774	0.31598	1
GO:0005980	glycogen catabolic process	12	1	0.97	1599	0.63854	1
GO:0005996	monosaccharide metabolic process	49	5	3.98	911	0.36709	1
GO:0006022	aminoglycan metabolic process	82	14	6.66	124	0.00584	1
GO:0006023	aminoglycan biosynthetic process	19	2	1.54	1188	0.46446	1
GO:0006024	glycosaminoglycan biosynthetic process	11	1	0.89	1527	0.60653	1
GO:0006026	aminoglycan catabolic process	29	7	2.36	141	0.00725	1
GO:0006027	glycosaminoglycan catabolic process	9	1	0.73	1352	0.53376	1
GO:0006029	proteoglycan metabolic process	18	1	1.46	1928	0.78283	1
GO:0006040	amino sugar metabolic process	67	16	5.44	19	6.6e-05	1
GO:0006066	alcohol metabolic process	61	7	4.96	675	0.22406	1
GO:0006073	cellular glucan metabolic process	24	3	1.95	769	0.30894	1
GO:0006081	cellular aldehyde metabolic process	20	2	1.62	1213	0.49179	1
GO:0006082	organic acid metabolic process	334	33	27.14	547	0.13656	1
GO:0006090	pyruvate metabolic process	30	2	2.44	1770	0.71311	1
GO:0006101	citrate metabolic process	32	1	2.6	2293	0.93396	1
GO:0006112	energy reserve metabolic process	24	3	1.95	770	0.30894	1
GO:0006139	nucleobase-containing compound metabolic process	1946	117	158.1	2703	0.99998	1
GO:0006140	regulation of nucleotide metabolic process	13	2	1.06	738	0.28557	1
GO:0006144	purine nucleobase metabolic process	14	1	1.14	1733	0.69498	1
GO:0006152	purine nucleoside catabolic process	9	1	0.73	1353	0.53376	1
GO:0006163	purine nucleotide metabolic process	152	4	12.35	2637	0.99882	1
GO:0006164	purine nucleotide biosynthetic process	75	4	6.09	2117	0.8692	1
GO:0006206	pyrimidine nucleobase metabolic process	13	2	1.06	739	0.28557	1
[truncated: 2,536 more rows]

## Sheet: GO_FP_down
GO.ID	Term	Annotated	Significant	Expected	Rank in Fisher.classic	Fisher.classic	Fisher.weight01
[truncated: 3,860 more rows]

[truncated: 5 more sheets: GO_FN_up, GO_FN_down, GO_consistent_up, GO_consistent_down, GO_reversed]
